# Supplementary material for: Unraveling the Role of Scutellaria baicalensis for the Treatment of Breast Cancer Using Network Pharmacology, Molecular Docking, and Molecular Dynamics Simulation
Source: MDPI journal article supplement (doi:10.3390/ijms24043594), 2023-02-10
Supplement: s1 [file s1]

## **Supplementary Materials**

**Unraveling the role of *Scutellaria baicalensis* for the treatment of breast cancer using network pharmacology, molecular docking, and molecular dynamics simulation**

*Yanqi Jiao<sup>1</sup>, Chengcheng Shi<sup>2</sup>, Yao Sun<sup>1,\*</sup>*

<sup>1</sup>School of Science, Harbin Institute of Technology (Shenzhen), Shenzhen, Guangdong, 518055, China.

<sup>2</sup>State Key Lab of Urban Water Resource and Environment, School of Science, Harbin Institute of Technology (Shenzhen), Shenzhen, Guangdong, 518055, China.

\*To whom correspondence should be addressed. Email: sunyao0819@hit.edu.cn (Dr. Yao Sun).

\*) Corresponding author:

Dr. Yao Sun (sunyao0819@hit.edu.cn)

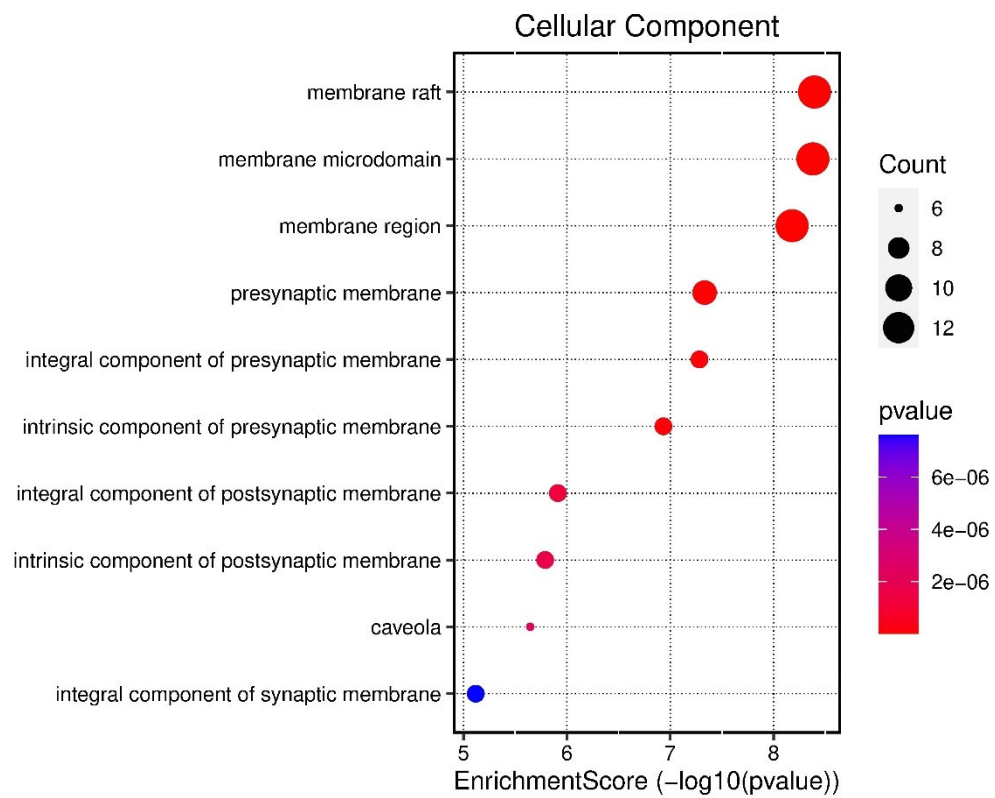

**Figure S1** Bubble diagram of Cellular Component (CC) enrichment.

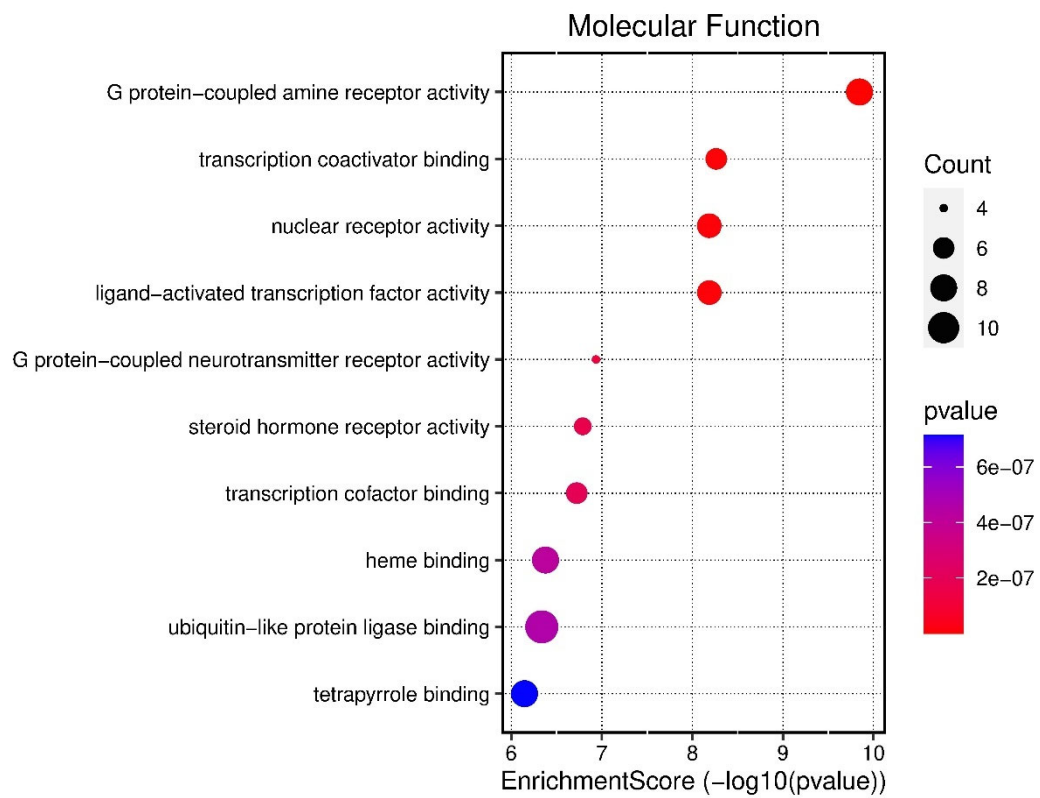

**Figure S2** Bubble diagram of Molecular Function (MF) enrichment.



**Table S1.** Results of BP GO terms enrichment of *Scutellaria baicalensis* in breast cancer.

| ID             | Description                               | pvalue          | qvalue          | Count |
|----------------|-------------------------------------------|-----------------|-----------------|-------|
| GO:00424<br>93 | response to drug                          | 8.16198E-<br>19 | 1.47689E-<br>15 | 23    |
| GO:00485<br>45 | response to steroid hormone               | 2.14771E-<br>16 | 1.94311E-<br>13 | 21    |
| GO:00324<br>96 | response to lipopolysaccharide            | 1.77376E-<br>15 | 1.06986E-<br>12 | 20    |
| GO:00069<br>79 | response to oxidative stress              | 3.59148E-<br>15 | 1.62467E-<br>12 | 19    |
| GO:00022<br>37 | response to molecule of bacterial origin  | 5.67948E-<br>15 | 2.05538E-<br>12 | 19    |
| GO:00075<br>68 | aging                                     | 1.83192E-<br>13 | 5.52467E-<br>11 | 19    |
| GO:00199<br>32 | second-messenger-mediated signaling       | 4.82922E-<br>13 | 1.20972E-<br>10 | 18    |
| GO:00725<br>93 | reactive oxygen species metabolic process | 5.34839E-<br>13 | 1.20972E-<br>10 | 18    |
| GO:19012<br>16 | positive regulation of neuron death       | 1.25039E-<br>12 | 2.33344E-<br>10 | 18    |
| GO:00621<br>97 | cellular response to chemical stress      | 1.28957E-<br>12 | 2.33344E-<br>10 | 17    |
| GO:19012<br>14 | regulation of neuron death                | 2.79866E-<br>12 | 4.55218E-<br>10 | 17    |
| GO:00486<br>08 | reproductive structure development        | 3.27047E-<br>12 | 4.55218E-<br>10 | 17    |
| GO:00487<br>32 | gland development                         | 3.27047E-<br>12 | 4.55218E-<br>10 | 16    |
| GO:00614<br>58 | reproductive system development           | 3.79982E-<br>12 | 4.9112E-<br>10  | 16    |
| GO:00003<br>02 | response to reactive oxygen species       | 6.71133E-<br>12 | 8.09598E-<br>10 | 16    |
| GO:19016<br>54 | response to ketone                        | 1.34143E-<br>11 | 1.51705E-<br>09 | 16    |
| GO:00709<br>97 | neuron death                              | 1.576E-11       | 1.67749E-<br>09 | 16    |
| GO:00100<br>38 | response to metal ion                     | 2.01817E-<br>11 | 2.02879E-<br>09 | 16    |
| GO:00345<br>99 | cellular response to oxidative stress     | 2.18591E-<br>11 | 2.08176E-<br>09 | 15    |
| GO:00506<br>73 | epithelial cell proliferation             | 4.89034E-<br>11 | 4.42447E-<br>09 | 15    |
| GO:00343<br>49 | glial cell apoptotic process              | 5.14895E-<br>11 | 4.43661E-<br>09 | 15    |

|                |                                                                     |                 |                 |    |
|----------------|---------------------------------------------------------------------|-----------------|-----------------|----|
| GO:00094<br>11 | response to UV                                                      | 7.20491E-<br>11 | 5.92595E-<br>09 | 15 |
| GO:00323<br>55 | response to estradiol                                               | 7.78408E-<br>11 | 6.12395E-<br>09 | 14 |
| GO:00308<br>79 | mammary gland development                                           | 8.4048E-<br>11  | 6.33678E-<br>09 | 14 |
| GO:20012<br>34 | negative regulation of apoptotic signaling pathway                  | 9.10494E-<br>11 | 6.59006E-<br>09 | 14 |
| GO:00030<br>18 | vascular process in circulatory system                              | 1.21104E-<br>10 | 8.1953E-<br>09  | 14 |
| GO:00513<br>84 | response to glucocorticoid                                          | 1.22286E-<br>10 | 8.1953E-<br>09  | 13 |
| GO:00486<br>38 | regulation of developmental growth                                  | 1.35771E-<br>10 | 8.77407E-<br>09 | 13 |
| GO:00063<br>52 | DNA-templated transcription, initiation                             | 2.07491E-<br>10 | 1.27262E-<br>08 | 13 |
| GO:00485<br>11 | rhythmic process                                                    | 2.16252E-<br>10 | 1.27262E-<br>08 | 13 |
| GO:00096<br>36 | response to toxic substance                                         | 2.18026E-<br>10 | 1.27262E-<br>08 | 13 |
| GO:00423<br>91 | regulation of membrane potential                                    | 3.38765E-<br>10 | 1.91559E-<br>08 | 13 |
| GO:00435<br>25 | positive regulation of neuron apoptotic process                     | 3.88256E-<br>10 | 2.11364E-<br>08 | 13 |
| GO:00319<br>60 | response to corticosteroid                                          | 3.97152E-<br>10 | 2.11364E-<br>08 | 13 |
| GO:19028<br>95 | positive regulation of pri-miRNA transcription by RNA polymerase II | 7.86857E-<br>10 | 4.06799E-<br>08 | 13 |
| GO:00316<br>67 | response to nutrient levels                                         | 8.77387E-<br>10 | 4.37367E-<br>08 | 13 |
| GO:00447<br>06 | multi-multicellular organism process                                | 8.94326E-<br>10 | 4.37367E-<br>08 | 13 |
| GO:00971<br>91 | extrinsic apoptotic signaling pathway                               | 1.09256E-<br>09 | 5.2025E-<br>08  | 12 |
| GO:20012<br>33 | regulation of apoptotic signaling pathway                           | 1.18792E-<br>09 | 5.51156E-<br>08 | 12 |
| GO:00973<br>05 | response to alcohol                                                 | 1.32964E-<br>09 | 5.93153E-<br>08 | 12 |
| GO:00971<br>93 | intrinsic apoptotic signaling pathway                               | 1.344E-09       | 5.93153E-<br>08 | 12 |
| GO:00352<br>96 | regulation of tube diameter                                         | 1.73608E-<br>09 | 7.30555E-<br>08 | 12 |
| GO:00977<br>46 | regulation of blood vessel diameter                                 | 1.73608E-<br>09 | 7.30555E-<br>08 | 12 |

|                |                                                                                             |                 |                 |    |
|----------------|---------------------------------------------------------------------------------------------|-----------------|-----------------|----|
| GO:00063<br>67 | transcription initiation from RNA polymerase II promoter                                    | 1.79627E-<br>09 | 7.38707E-<br>08 | 12 |
| GO:00351<br>50 | regulation of tube size                                                                     | 1.85834E-<br>09 | 7.47247E-<br>08 | 12 |
| GO:00330<br>02 | muscle cell proliferation                                                                   | 2.13838E-<br>09 | 8.41163E-<br>08 | 12 |
| GO:20012<br>37 | negative regulation of extrinsic apoptotic signaling pathway                                | 2.29746E-<br>09 | 8.84508E-<br>08 | 12 |
| GO:00075<br>65 | female pregnancy                                                                            | 2.63575E-<br>09 | 9.93609E-<br>08 | 12 |
| GO:00380<br>34 | signal transduction in absence of ligand                                                    | 2.77439E-<br>09 | 1.00404E-<br>07 | 12 |
| GO:00971<br>92 | extrinsic apoptotic signaling pathway in absence of ligand                                  | 2.77439E-<br>09 | 1.00404E-<br>07 | 12 |
| GO:00199<br>33 | cAMP-mediated signaling                                                                     | 3.09229E-<br>09 | 1.09714E-<br>07 | 12 |
| GO:00093<br>14 | response to radiation                                                                       | 3.4837E-<br>09  | 1.21224E-<br>07 | 12 |
| GO:00018<br>90 | placenta development                                                                        | 4.04777E-<br>09 | 1.38195E-<br>07 | 12 |
| GO:00094<br>16 | response to light stimulus                                                                  | 4.25154E-<br>09 | 1.42464E-<br>07 | 11 |
| GO:19028<br>93 | regulation of pri-miRNA transcription by RNA polymerase II                                  | 4.681E-09       | 1.54003E-<br>07 | 11 |
| GO:00071<br>87 | G protein-coupled receptor signaling pathway, coupled to cyclic nucleotide second messenger | 4.98268E-<br>09 | 1.61001E-<br>07 | 11 |
| GO:00096<br>12 | response to mechanical stimulus                                                             | 5.16969E-<br>09 | 1.64113E-<br>07 | 11 |
| GO:00506<br>78 | regulation of epithelial cell proliferation                                                 | 6.11762E-<br>09 | 1.87395E-<br>07 | 11 |
| GO:00616<br>14 | pri-miRNA transcription by RNA polymerase II                                                | 6.18384E-<br>09 | 1.87395E-<br>07 | 11 |
| GO:00481<br>45 | regulation of fibroblast proliferation                                                      | 6.2861E-<br>09  | 1.87395E-<br>07 | 11 |
| GO:00704<br>82 | response to oxygen levels                                                                   | 6.31737E-<br>09 | 1.87395E-<br>07 | 11 |
| GO:00435<br>23 | regulation of neuron apoptotic process                                                      | 6.61719E-<br>09 | 1.93123E-<br>07 | 11 |
| GO:00481<br>44 | fibroblast proliferation                                                                    | 6.92061E-<br>09 | 1.96406E-<br>07 | 11 |
| GO:00432<br>81 | regulation of cysteine-type endopeptidase activity involved in apoptotic process            | 6.94676E-<br>09 | 1.96406E-<br>07 | 11 |
| GO:00199<br>35 | cyclic-nucleotide-mediated signaling                                                        | 1.06415E-<br>08 | 2.9624E-<br>07  | 11 |

|            |                                                                           |             |             |    |
|------------|---------------------------------------------------------------------------|-------------|-------------|----|
| GO:0043270 | positive regulation of ion transport                                      | 1.17636E-08 | 3.22513E-07 | 11 |
| GO:0031649 | heat generation                                                           | 1.3811E-08  | 3.72994E-07 | 11 |
| GO:0007188 | adenylate cyclase-modulating G protein-coupled receptor signaling pathway | 1.60009E-08 | 4.25782E-07 | 11 |
| GO:0001666 | response to hypoxia                                                       | 1.7384E-08  | 4.55883E-07 | 11 |
| GO:2000116 | regulation of cysteine-type endopeptidase activity                        | 2.07998E-08 | 5.37667E-07 | 11 |
| GO:0036293 | response to decreased oxygen levels                                       | 2.56242E-08 | 6.38417E-07 | 11 |
| GO:0060749 | mammary gland alveolus development                                        | 2.57558E-08 | 6.38417E-07 | 11 |
| GO:0061377 | mammary gland lobule development                                          | 2.57558E-08 | 6.38417E-07 | 11 |
| GO:0051402 | neuron apoptotic process                                                  | 2.68429E-08 | 6.56372E-07 | 11 |
| GO:0071216 | cellular response to biotic stimulus                                      | 2.79896E-08 | 6.75286E-07 | 11 |
| GO:0018105 | peptidyl-serine phosphorylation                                           | 3.10234E-08 | 7.38632E-07 | 11 |
| GO:0051412 | response to corticosterone                                                | 3.42107E-08 | 8.03939E-07 | 11 |
| GO:0001935 | endothelial cell proliferation                                            | 4.16246E-08 | 9.65624E-07 | 11 |
| GO:2000377 | regulation of reactive oxygen species metabolic process                   | 4.36439E-08 | 9.99651E-07 | 11 |
| GO:0061180 | mammary gland epithelium development                                      | 4.97338E-08 | 1.1249E-06  | 11 |
| GO:0071887 | leukocyte apoptotic process                                               | 5.08668E-08 | 1.13632E-06 | 11 |
| GO:0018209 | peptidyl-serine modification                                              | 6.79557E-08 | 1.49956E-06 | 11 |
| GO:0050679 | positive regulation of epithelial cell proliferation                      | 7.22707E-08 | 1.57557E-06 | 11 |
| GO:2001236 | regulation of extrinsic apoptotic signaling pathway                       | 8.72146E-08 | 1.87872E-06 | 11 |
| GO:0042310 | vasoconstriction                                                          | 9.61378E-08 | 2.04657E-06 | 11 |
| GO:0043536 | positive regulation of blood vessel endothelial cell migration            | 1.05074E-07 | 2.2108E-06  | 10 |
| GO:0010822 | positive regulation of mitochondrion organization                         | 1.0854E-07  | 2.25748E-06 | 10 |



|            |                                                                    |             |             |    |
|------------|--------------------------------------------------------------------|-------------|-------------|----|
| GO:0002064 | epithelial cell development                                        | 1.11516E-07 | 2.29302E-06 | 10 |
| GO:0034614 | cellular response to reactive oxygen species                       | 1.31844E-07 | 2.65366E-06 | 10 |
| GO:0051222 | positive regulation of protein transport                           | 1.31988E-07 | 2.65366E-06 | 10 |
| GO:0030099 | myeloid cell differentiation                                       | 1.46758E-07 | 2.91818E-06 | 10 |
| GO:0022612 | gland morphogenesis                                                | 1.4941E-07  | 2.93862E-06 | 10 |
| GO:0048660 | regulation of smooth muscle cell proliferation                     | 1.53098E-07 | 2.97059E-06 | 10 |
| GO:0032409 | regulation of transporter activity                                 | 1.54318E-07 | 2.97059E-06 | 10 |
| GO:0008637 | apoptotic mitochondrial changes                                    | 1.59002E-07 | 3.02852E-06 | 10 |
| GO:0048146 | positive regulation of fibroblast proliferation                    | 1.61197E-07 | 3.03836E-06 | 10 |
| GO:0048659 | smooth muscle cell proliferation                                   | 1.68871E-07 | 3.15019E-06 | 10 |
| GO:0010634 | positive regulation of epithelial cell migration                   | 1.77275E-07 | 3.27321E-06 | 10 |
| GO:0097756 | negative regulation of blood vessel diameter                       | 1.89522E-07 | 3.464E-06   | 10 |
| GO:0071880 | adenylate cyclase-activating adrenergic receptor signaling pathway | 2.10364E-07 | 3.7696E-06  | 10 |
| GO:0045862 | positive regulation of proteolysis                                 | 2.12492E-07 | 3.7696E-06  | 10 |
| GO:1904951 | positive regulation of establishment of protein localization       | 2.12492E-07 | 3.7696E-06  | 10 |
| GO:2001235 | positive regulation of apoptotic signaling pathway                 | 2.46984E-07 | 4.33895E-06 | 10 |
| GO:0001936 | regulation of endothelial cell proliferation                       | 2.58669E-07 | 4.50053E-06 | 10 |
| GO:0046683 | response to organophosphorus                                       | 2.71921E-07 | 4.66042E-06 | 10 |
| GO:0051090 | regulation of DNA-binding transcription factor activity            | 2.7301E-07  | 4.66042E-06 | 10 |
| GO:0051899 | membrane depolarization                                            | 2.79977E-07 | 4.73468E-06 | 10 |
| GO:0042133 | neurotransmitter metabolic process                                 | 3.02718E-07 | 5.07186E-06 | 10 |
| GO:0001701 | in utero embryonic development                                     | 3.07557E-07 | 5.10565E-06 | 10 |

|                |                                                                                 |                 |                 |    |
|----------------|---------------------------------------------------------------------------------|-----------------|-----------------|----|
| GO:00108<br>21 | regulation of mitochondrion organization                                        | 3.54783E-<br>07 | 5.78351E-<br>06 | 10 |
| GO:00352<br>65 | organ growth                                                                    | 3.54783E-<br>07 | 5.78351E-<br>06 | 10 |
| GO:00525<br>47 | regulation of peptidase activity                                                | 3.58282E-<br>07 | 5.7884E-<br>06  | 10 |
| GO:00075<br>89 | body fluid secretion                                                            | 3.76315E-<br>07 | 5.97309E-<br>06 | 10 |
| GO:00971<br>94 | execution phase of apoptosis                                                    | 3.76315E-<br>07 | 5.97309E-<br>06 | 10 |
| GO:00513<br>85 | response to mineralocorticoid                                                   | 4.24533E-<br>07 | 6.62226E-<br>06 | 10 |
| GO:00718<br>75 | adrenergic receptor signaling pathway                                           | 4.24533E-<br>07 | 6.62226E-<br>06 | 10 |
| GO:00018<br>36 | release of cytochrome c from mitochondria                                       | 4.32792E-<br>07 | 6.63667E-<br>06 | 10 |
| GO:00192<br>29 | regulation of vasoconstriction                                                  | 4.32792E-<br>07 | 6.63667E-<br>06 | 10 |
| GO:00714<br>96 | cellular response to external stimulus                                          | 4.79114E-<br>07 | 7.28525E-<br>06 | 10 |
| GO:19037<br>99 | negative regulation of production of miRNAs involved in gene silencing by miRNA | 4.8861E-<br>07  | 7.36773E-<br>06 | 10 |
| GO:00100<br>39 | response to iron ion                                                            | 4.98445E-<br>07 | 7.45391E-<br>06 | 10 |
| GO:00109<br>52 | positive regulation of peptidase activity                                       | 5.45221E-<br>07 | 8.08659E-<br>06 | 10 |
| GO:00071<br>89 | adenylate cyclase-activating G protein-coupled receptor signaling pathway       | 5.52519E-<br>07 | 8.1282E-<br>06  | 10 |
| GO:00456<br>39 | positive regulation of myeloid cell differentiation                             | 5.72197E-<br>07 | 8.29462E-<br>06 | 10 |
| GO:00331<br>57 | regulation of intracellular protein transport                                   | 5.76705E-<br>07 | 8.29462E-<br>06 | 9  |
| GO:00427<br>59 | long-chain fatty acid biosynthetic process                                      | 5.82167E-<br>07 | 8.29462E-<br>06 | 9  |
| GO:00459<br>07 | positive regulation of vasoconstriction                                         | 5.82167E-<br>07 | 8.29462E-<br>06 | 9  |
| GO:00305<br>22 | intracellular receptor signaling pathway                                        | 5.96973E-<br>07 | 8.43911E-<br>06 | 9  |
| GO:00140<br>74 | response to purine-containing compound                                          | 6.12415E-<br>07 | 8.59029E-<br>06 | 9  |
| GO:00601<br>35 | maternal process involved in female pregnancy                                   | 6.38202E-<br>07 | 8.88315E-<br>06 | 9  |
| GO:00066<br>06 | protein import into nucleus                                                     | 6.44387E-<br>07 | 8.89821E-<br>06 | 9  |

|            |                                                                                                              |             |             |   |
|------------|--------------------------------------------------------------------------------------------------------------|-------------|-------------|---|
| GO:0008630 | intrinsic apoptotic signaling pathway in response to DNA damage                                              | 6.54036E-07 | 8.89821E-06 | 9 |
| GO:0048661 | positive regulation of smooth muscle cell proliferation                                                      | 6.54036E-07 | 8.89821E-06 | 9 |
| GO:1901030 | positive regulation of mitochondrial outer membrane permeabilization involved in apoptotic signaling pathway | 6.76619E-07 | 9.13675E-06 | 9 |
| GO:0007200 | phospholipase C-activating G protein-coupled receptor signaling pathway                                      | 6.98507E-07 | 9.36244E-06 | 9 |
| GO:0071222 | cellular response to lipopolysaccharide                                                                      | 7.26335E-07 | 9.66385E-06 | 9 |
| GO:0002573 | myeloid leukocyte differentiation                                                                            | 7.86804E-07 | 1.03504E-05 | 9 |
| GO:0032091 | negative regulation of protein binding                                                                       | 7.95094E-07 | 1.03504E-05 | 9 |
| GO:2000379 | positive regulation of reactive oxygen species metabolic process                                             | 7.95094E-07 | 1.03504E-05 | 9 |
| GO:0002685 | regulation of leukocyte migration                                                                            | 8.51585E-07 | 1.10066E-05 | 9 |
| GO:0098926 | postsynaptic signal transduction                                                                             | 9.01648E-07 | 1.1571E-05  | 9 |
| GO:0015980 | energy derivation by oxidation of organic compounds                                                          | 9.23229E-07 | 1.17645E-05 | 9 |
| GO:0071276 | cellular response to cadmium ion                                                                             | 1.03432E-06 | 1.3088E-05  | 9 |
| GO:0007623 | circadian rhythm                                                                                             | 1.07441E-06 | 1.35008E-05 | 9 |
| GO:0043467 | regulation of generation of precursor metabolites and energy                                                 | 1.15432E-06 | 1.43102E-05 | 9 |
| GO:0046822 | regulation of nucleocytoplasmic transport                                                                    | 1.15464E-06 | 1.43102E-05 | 9 |
| GO:0032386 | regulation of intracellular transport                                                                        | 1.20214E-06 | 1.47976E-05 | 9 |
| GO:0001938 | positive regulation of endothelial cell proliferation                                                        | 1.2261E-06  | 1.49906E-05 | 9 |
| GO:0032388 | positive regulation of intracellular transport                                                               | 1.24952E-06 | 1.50732E-05 | 9 |
| GO:0071219 | cellular response to molecule of bacterial origin                                                            | 1.24952E-06 | 1.50732E-05 | 9 |
| GO:0043535 | regulation of blood vessel endothelial cell migration                                                        | 1.26619E-06 | 1.51731E-05 | 9 |
| GO:0008406 | gonad development                                                                                            | 1.29697E-06 | 1.53667E-05 | 9 |
| GO:0022407 | regulation of cell-cell adhesion                                                                             | 1.29933E-06 | 1.53667E-05 | 9 |

|                |                                                                                                     |                 |                 |   |
|----------------|-----------------------------------------------------------------------------------------------------|-----------------|-----------------|---|
| GO:00436<br>20 | regulation of DNA-templated transcription in response to stress                                     | 1.38019E-<br>06 | 1.61939E-<br>05 | 9 |
| GO:20012<br>42 | regulation of intrinsic apoptotic signaling pathway                                                 | 1.38718E-<br>06 | 1.61939E-<br>05 | 9 |
| GO:00359<br>94 | response to muscle stretch                                                                          | 1.47176E-<br>06 | 1.70712E-<br>05 | 9 |
| GO:00068<br>01 | superoxide metabolic process                                                                        | 1.51717E-<br>06 | 1.74859E-<br>05 | 9 |
| GO:00511<br>00 | negative regulation of binding                                                                      | 1.58708E-<br>06 | 1.81758E-<br>05 | 9 |
| GO:00451<br>37 | development of primary sexual characteristics                                                       | 1.6157E-<br>06  | 1.83872E-<br>05 | 9 |
| GO:00511<br>70 | import into nucleus                                                                                 | 1.73356E-<br>06 | 1.96052E-<br>05 | 9 |
| GO:19035<br>24 | positive regulation of blood circulation                                                            | 1.77668E-<br>06 | 1.9968E-<br>05  | 9 |
| GO:00072<br>13 | G protein-coupled acetylcholine receptor signaling pathway                                          | 1.85736E-<br>06 | 2.07459E-<br>05 | 9 |
| GO:00066<br>33 | fatty acid biosynthetic process                                                                     | 1.8914E-<br>06  | 2.08692E-<br>05 | 9 |
| GO:00106<br>32 | regulation of epithelial cell migration                                                             | 1.89146E-<br>06 | 2.08692E-<br>05 | 9 |
| GO:00086<br>31 | intrinsic apoptotic signaling pathway in response to oxidative stress                               | 1.94626E-<br>06 | 2.13436E-<br>05 | 9 |
| GO:19035<br>22 | regulation of blood circulation                                                                     | 2.00717E-<br>06 | 2.18791E-<br>05 | 9 |
| GO:00066<br>90 | icosanoid metabolic process                                                                         | 2.05328E-<br>06 | 2.22017E-<br>05 | 9 |
| GO:19015<br>68 | fatty acid derivative metabolic process                                                             | 2.06131E-<br>06 | 2.22017E-<br>05 | 9 |
| GO:00609<br>65 | negative regulation of gene silencing by miRNA                                                      | 2.31314E-<br>06 | 2.47667E-<br>05 | 9 |
| GO:00350<br>94 | response to nicotine                                                                                | 2.45156E-<br>06 | 2.59417E-<br>05 | 9 |
| GO:19010<br>28 | regulation of mitochondrial outer membrane permeabilization involved in apoptotic signaling pathway | 2.45156E-<br>06 | 2.59417E-<br>05 | 9 |
| GO:20001<br>34 | negative regulation of G1/S transition of mitotic cell cycle                                        | 2.54808E-<br>06 | 2.68063E-<br>05 | 9 |
| GO:00346<br>44 | cellular response to UV                                                                             | 2.58706E-<br>06 | 2.70591E-<br>05 | 9 |
| GO:19001<br>80 | regulation of protein localization to nucleus                                                       | 2.68623E-<br>06 | 2.79349E-<br>05 | 9 |
| GO:00325<br>70 | response to progesterone                                                                            | 2.74011E-<br>06 | 2.83323E-<br>05 | 8 |

|                |                                                                                           |                 |                 |   |
|----------------|-------------------------------------------------------------------------------------------|-----------------|-----------------|---|
| GO:00903<br>16 | positive regulation of intracellular protein transport                                    | 2.76219E-<br>06 | 2.83983E-<br>05 | 8 |
| GO:19034<br>09 | reactive oxygen species biosynthetic process                                              | 2.83058E-<br>06 | 2.89371E-<br>05 | 8 |
| GO:00069<br>53 | acute-phase response                                                                      | 3.05469E-<br>06 | 3.10527E-<br>05 | 8 |
| GO:20000<br>45 | regulation of G1/S transition of mitotic cell cycle                                       | 3.11937E-<br>06 | 3.15331E-<br>05 | 8 |
| GO:00066<br>31 | fatty acid metabolic process                                                              | 3.18913E-<br>06 | 3.1882E-<br>05  | 8 |
| GO:00457<br>87 | positive regulation of cell cycle                                                         | 3.18913E-<br>06 | 3.1882E-<br>05  | 8 |
| GO:00346<br>12 | response to tumor necrosis factor                                                         | 3.26709E-<br>06 | 3.24819E-<br>05 | 8 |
| GO:00082<br>17 | regulation of blood pressure                                                              | 3.37868E-<br>06 | 3.30466E-<br>05 | 8 |
| GO:00486<br>39 | positive regulation of developmental growth                                               | 3.37868E-<br>06 | 3.30466E-<br>05 | 8 |
| GO:00611<br>38 | morphogenesis of a branching epithelium                                                   | 3.37868E-<br>06 | 3.30466E-<br>05 | 8 |
| GO:00105<br>95 | positive regulation of endothelial cell migration                                         | 3.47447E-<br>06 | 3.35847E-<br>05 | 8 |
| GO:19028<br>07 | negative regulation of cell cycle G1/S phase transition                                   | 3.47447E-<br>06 | 3.35847E-<br>05 | 8 |
| GO:00510<br>51 | negative regulation of transport                                                          | 3.48937E-<br>06 | 3.35847E-<br>05 | 8 |
| GO:00098<br>95 | negative regulation of catabolic process                                                  | 3.54934E-<br>06 | 3.39811E-<br>05 | 8 |
| GO:00427<br>70 | signal transduction in response to DNA damage                                             | 3.65324E-<br>06 | 3.44663E-<br>05 | 8 |
| GO:00435<br>34 | blood vessel endothelial cell migration                                                   | 3.65606E-<br>06 | 3.44663E-<br>05 | 8 |
| GO:00017<br>76 | leukocyte homeostasis                                                                     | 3.6762E-<br>06  | 3.44663E-<br>05 | 8 |
| GO:00069<br>19 | activation of cysteine-type endopeptidase activity involved in apoptotic process          | 3.6762E-<br>06  | 3.44663E-<br>05 | 8 |
| GO:00075<br>95 | lactation                                                                                 | 3.76865E-<br>06 | 3.4906E-<br>05  | 8 |
| GO:00702<br>31 | T cell apoptotic process                                                                  | 3.76865E-<br>06 | 3.4906E-<br>05  | 8 |
| GO:00459<br>26 | negative regulation of growth                                                             | 3.78097E-<br>06 | 3.4906E-<br>05  | 8 |
| GO:00432<br>80 | positive regulation of cysteine-type endopeptidase activity involved in apoptotic process | 3.83961E-<br>06 | 3.52674E-<br>05 | 8 |

|                |                                                                                                                         |                 |                 |   |
|----------------|-------------------------------------------------------------------------------------------------------------------------|-----------------|-----------------|---|
| GO:00347<br>65 | regulation of ion transmembrane transport                                                                               | 3.95933E-<br>06 | 3.61833E-<br>05 | 8 |
| GO:00973<br>00 | programmed necrotic cell death                                                                                          | 4.17153E-<br>06 | 3.72689E-<br>05 | 8 |
| GO:00601<br>49 | negative regulation of posttranscriptional gene silencing                                                               | 4.1811E-<br>06  | 3.72689E-<br>05 | 8 |
| GO:00609<br>67 | negative regulation of gene silencing by RNA                                                                            | 4.1811E-<br>06  | 3.72689E-<br>05 | 8 |
| GO:19015<br>22 | positive regulation of transcription from RNA polymerase II promoter involved in cellular response to chemical stimulus | 4.1811E-<br>06  | 3.72689E-<br>05 | 8 |
| GO:19037<br>98 | regulation of production of miRNAs involved in gene silencing by miRNA                                                  | 4.1811E-<br>06  | 3.72689E-<br>05 | 8 |
| GO:00712<br>48 | cellular response to metal ion                                                                                          | 4.26917E-<br>06 | 3.78674E-<br>05 | 8 |
| GO:00605<br>62 | epithelial tube morphogenesis                                                                                           | 4.40805E-<br>06 | 3.85326E-<br>05 | 8 |
| GO:00712<br>14 | cellular response to abiotic stimulus                                                                                   | 4.40805E-<br>06 | 3.85326E-<br>05 | 8 |
| GO:01040<br>04 | cellular response to environmental stimulus                                                                             | 4.40805E-<br>06 | 3.85326E-<br>05 | 8 |
| GO:00018<br>92 | embryonic placenta development                                                                                          | 4.49145E-<br>06 | 3.8886E-<br>05  | 8 |
| GO:00086<br>25 | extrinsic apoptotic signaling pathway via death domain receptors                                                        | 4.49145E-<br>06 | 3.8886E-<br>05  | 8 |
| GO:00015<br>03 | ossification                                                                                                            | 4.65596E-<br>06 | 4.01183E-<br>05 | 8 |
| GO:19033<br>51 | cellular response to dopamine                                                                                           | 4.79374E-<br>06 | 4.11097E-<br>05 | 8 |
| GO:19033<br>50 | response to dopamine                                                                                                    | 5.11236E-<br>06 | 4.36353E-<br>05 | 8 |
| GO:19038<br>29 | positive regulation of cellular protein localization                                                                    | 5.30199E-<br>06 | 4.50413E-<br>05 | 8 |
| GO:00170<br>38 | protein import                                                                                                          | 5.55243E-<br>06 | 4.69485E-<br>05 | 8 |
| GO:00017<br>63 | morphogenesis of a branching structure                                                                                  | 5.75998E-<br>06 | 4.82525E-<br>05 | 8 |
| GO:00310<br>99 | regeneration                                                                                                            | 5.75998E-<br>06 | 4.82525E-<br>05 | 8 |
| GO:00158<br>50 | organic hydroxy compound transport                                                                                      | 5.84428E-<br>06 | 4.8733E-<br>05  | 8 |
| GO:00509<br>27 | positive regulation of positive chemotaxis                                                                              | 5.92909E-<br>06 | 4.89887E-<br>05 | 8 |
| GO:00709<br>20 | regulation of production of small RNA involved in gene silencing by RNA                                                 | 5.92909E-<br>06 | 4.89887E-<br>05 | 8 |

|                |                                                                  |                 |                 |   |
|----------------|------------------------------------------------------------------|-----------------|-----------------|---|
| GO:00102<br>12 | response to ionizing radiation                                   | 6.18092E-<br>06 | 5.08139E-<br>05 | 8 |
| GO:00510<br>91 | positive regulation of DNA-binding transcription factor activity | 6.20616E-<br>06 | 5.08139E-<br>05 | 8 |
| GO:00507<br>27 | regulation of inflammatory response                              | 6.2526E-<br>06  | 5.09636E-<br>05 | 8 |
| GO:00331<br>35 | regulation of peptidyl-serine phosphorylation                    | 6.4692E-<br>06  | 5.24926E-<br>05 | 8 |
| GO:00105<br>06 | regulation of autophagy                                          | 6.67944E-<br>06 | 5.37427E-<br>05 | 8 |
| GO:00457<br>85 | positive regulation of cell adhesion                             | 6.68267E-<br>06 | 5.37427E-<br>05 | 8 |
| GO:00973<br>45 | mitochondrial outer membrane permeabilization                    | 6.72042E-<br>06 | 5.38072E-<br>05 | 8 |
| GO:00425<br>42 | response to hydrogen peroxide                                    | 6.76857E-<br>06 | 5.3954E-<br>05  | 8 |
| GO:19028<br>06 | regulation of cell cycle G1/S phase transition                   | 6.89911E-<br>06 | 5.47533E-<br>05 | 8 |
| GO:00509<br>26 | regulation of positive chemotaxis                                | 6.98131E-<br>06 | 5.51638E-<br>05 | 8 |
| GO:00551<br>23 | digestive system development                                     | 7.07937E-<br>06 | 5.56954E-<br>05 | 8 |
| GO:00192<br>16 | regulation of lipid metabolic process                            | 7.13836E-<br>06 | 5.59164E-<br>05 | 8 |
| GO:00606<br>88 | regulation of morphogenesis of a branching structure             | 7.35134E-<br>06 | 5.7052E-<br>05  | 8 |
| GO:00714<br>56 | cellular response to hypoxia                                     | 7.40529E-<br>06 | 5.7052E-<br>05  | 8 |
| GO:00421<br>00 | B cell proliferation                                             | 7.40559E-<br>06 | 5.7052E-<br>05  | 8 |
| GO:00228<br>98 | regulation of transmembrane transporter activity                 | 7.40946E-<br>06 | 5.7052E-<br>05  | 8 |
| GO:00525<br>48 | regulation of endopeptidase activity                             | 7.62097E-<br>06 | 5.82412E-<br>05 | 8 |
| GO:00345<br>04 | protein localization to nucleus                                  | 7.62828E-<br>06 | 5.82412E-<br>05 | 8 |
| GO:20012<br>43 | negative regulation of intrinsic apoptotic signaling pathway     | 7.85819E-<br>06 | 5.97445E-<br>05 | 8 |
| GO:00347<br>64 | positive regulation of transmembrane transport                   | 7.94254E-<br>06 | 5.99805E-<br>05 | 8 |
| GO:00069<br>13 | nucleocytoplasmic transport                                      | 7.95553E-<br>06 | 5.99805E-<br>05 | 8 |
| GO:00352<br>64 | multicellular organism growth                                    | 8.08382E-<br>06 | 6.06948E-<br>05 | 8 |

|            |                                                             |             |             |   |
|------------|-------------------------------------------------------------|-------------|-------------|---|
| GO:0001963 | synaptic transmission, dopaminergic                         | 8.16529E-06 | 6.10532E-05 | 8 |
| GO:0043393 | regulation of protein binding                               | 8.22329E-06 | 6.12338E-05 | 8 |
| GO:0007548 | sex differentiation                                         | 8.31828E-06 | 6.16873E-05 | 8 |
| GO:0000077 | DNA damage checkpoint                                       | 8.44383E-06 | 6.18579E-05 | 8 |
| GO:0061041 | regulation of wound healing                                 | 8.44383E-06 | 6.18579E-05 | 8 |
| GO:2001056 | positive regulation of cysteine-type endopeptidase activity | 8.44383E-06 | 6.18579E-05 | 8 |
| GO:0051169 | nuclear transport                                           | 8.56392E-06 | 6.24846E-05 | 8 |
| GO:0002763 | positive regulation of myeloid leukocyte differentiation    | 8.75175E-06 | 6.33443E-05 | 8 |
| GO:0019369 | arachidonic acid metabolic process                          | 8.75175E-06 | 6.33443E-05 | 8 |
| GO:0008585 | female gonad development                                    | 8.83074E-06 | 6.36613E-05 | 8 |
| GO:0046651 | lymphocyte proliferation                                    | 9.06104E-06 | 6.50624E-05 | 8 |
| GO:0006006 | glucose metabolic process                                   | 9.11637E-06 | 6.52009E-05 | 8 |
| GO:1901342 | regulation of vasculature development                       | 9.44157E-06 | 6.68095E-05 | 8 |
| GO:0095500 | acetylcholine receptor signaling pathway                    | 9.49111E-06 | 6.68095E-05 | 8 |
| GO:0031663 | lipopolysaccharide-mediated signaling pathway               | 9.52589E-06 | 6.68095E-05 | 8 |
| GO:0042306 | regulation of protein import into nucleus                   | 9.52589E-06 | 6.68095E-05 | 8 |
| GO:0046456 | icosanoid biosynthetic process                              | 9.52589E-06 | 6.68095E-05 | 8 |
| GO:0006936 | muscle contraction                                          | 9.66751E-06 | 6.75409E-05 | 8 |
| GO:0032943 | mononuclear cell proliferation                              | 9.85986E-06 | 6.86199E-05 | 8 |
| GO:0048754 | branching morphogenesis of an epithelial tube               | 1.00199E-05 | 6.94663E-05 | 8 |
| GO:0010631 | epithelial cell migration                                   | 1.0387E-05  | 7.17366E-05 | 8 |
| GO:0036294 | cellular response to decreased oxygen levels                | 1.04335E-05 | 7.1765E-05  | 8 |



|                |                                                                                          |                 |                 |   |
|----------------|------------------------------------------------------------------------------------------|-----------------|-----------------|---|
| GO:19015<br>70 | fatty acid derivative biosynthetic process                                               | 1.04704E-<br>05 | 7.1765E-<br>05  | 8 |
| GO:00510<br>98 | regulation of binding                                                                    | 1.0892E-<br>05  | 7.40613E-<br>05 | 8 |
| GO:00432<br>71 | negative regulation of ion transport                                                     | 1.0895E-<br>05  | 7.40613E-<br>05 | 7 |
| GO:00485<br>68 | embryonic organ development                                                              | 1.09316E-<br>05 | 7.40613E-<br>05 | 7 |
| GO:00017<br>82 | B cell homeostasis                                                                       | 1.09692E-<br>05 | 7.40613E-<br>05 | 7 |
| GO:00020<br>27 | regulation of heart rate                                                                 | 1.10687E-<br>05 | 7.44556E-<br>05 | 7 |
| GO:00901<br>32 | epithelium migration                                                                     | 1.11523E-<br>05 | 7.474E-05       | 7 |
| GO:19021<br>10 | positive regulation of mitochondrial membrane permeability involved in apoptotic process | 1.12342E-<br>05 | 7.50109E-<br>05 | 7 |
| GO:00712<br>41 | cellular response to inorganic substance                                                 | 1.15236E-<br>05 | 7.66607E-<br>05 | 7 |
| GO:00465<br>45 | development of primary female sexual characteristics                                     | 1.16944E-<br>05 | 7.75115E-<br>05 | 7 |
| GO:00620<br>12 | regulation of small molecule metabolic process                                           | 1.21177E-<br>05 | 7.98094E-<br>05 | 7 |
| GO:00022<br>60 | lymphocyte homeostasis                                                                   | 1.21734E-<br>05 | 7.98094E-<br>05 | 7 |
| GO:19045<br>89 | regulation of protein import                                                             | 1.21734E-<br>05 | 7.98094E-<br>05 | 7 |
| GO:00718<br>68 | cellular response to monoamine stimulus                                                  | 1.23483E-<br>05 | 8.01504E-<br>05 | 7 |
| GO:00718<br>70 | cellular response to catecholamine stimulus                                              | 1.23483E-<br>05 | 8.01504E-<br>05 | 7 |
| GO:00018<br>44 | protein insertion into mitochondrial membrane involved in apoptotic signaling pathway    | 1.26102E-<br>05 | 8.01504E-<br>05 | 7 |
| GO:19051<br>44 | response to acetylcholine                                                                | 1.26102E-<br>05 | 8.01504E-<br>05 | 7 |
| GO:19051<br>45 | cellular response to acetylcholine                                                       | 1.26102E-<br>05 | 8.01504E-<br>05 | 7 |
| GO:00511<br>46 | striated muscle cell differentiation                                                     | 1.26279E-<br>05 | 8.01504E-<br>05 | 7 |
| GO:00016<br>60 | fever generation                                                                         | 1.27126E-<br>05 | 8.01504E-<br>05 | 7 |
| GO:00196<br>14 | catechol-containing compound catabolic process                                           | 1.27126E-<br>05 | 8.01504E-<br>05 | 7 |
| GO:00320<br>25 | response to cobalt ion                                                                   | 1.27126E-<br>05 | 8.01504E-<br>05 | 7 |

|                |                                                                                   |                 |                 |   |
|----------------|-----------------------------------------------------------------------------------|-----------------|-----------------|---|
| GO:00343<br>50 | regulation of glial cell apoptotic process                                        | 1.27126E-<br>05 | 8.01504E-<br>05 | 7 |
| GO:00424<br>24 | catecholamine catabolic process                                                   | 1.27126E-<br>05 | 8.01504E-<br>05 | 7 |
| GO:00901<br>30 | tissue migration                                                                  | 1.28301E-<br>05 | 8.03683E-<br>05 | 7 |
| GO:00315<br>70 | DNA integrity checkpoint                                                          | 1.2836E-<br>05  | 8.03683E-<br>05 | 7 |
| GO:00315<br>71 | mitotic G1 DNA damage checkpoint                                                  | 1.31728E-<br>05 | 8.19098E-<br>05 | 7 |
| GO:19026<br>86 | mitochondrial outer membrane permeabilization involved in programmed cell death   | 1.31728E-<br>05 | 8.19098E-<br>05 | 7 |
| GO:00447<br>83 | G1 DNA damage checkpoint                                                          | 1.4235E-<br>05  | 8.73148E-<br>05 | 7 |
| GO:00448<br>19 | mitotic G1/S transition checkpoint                                                | 1.4235E-<br>05  | 8.73148E-<br>05 | 7 |
| GO:00466<br>86 | response to cadmium ion                                                           | 1.4235E-<br>05  | 8.73148E-<br>05 | 7 |
| GO:00702<br>65 | necrotic cell death                                                               | 1.4235E-<br>05  | 8.73148E-<br>05 | 7 |
| GO:00026<br>75 | positive regulation of acute inflammatory response                                | 1.44251E-<br>05 | 8.76881E-<br>05 | 7 |
| GO:00069<br>39 | smooth muscle contraction                                                         | 1.44897E-<br>05 | 8.76881E-<br>05 | 7 |
| GO:00331<br>38 | positive regulation of peptidyl-serine phosphorylation                            | 1.44897E-<br>05 | 8.76881E-<br>05 | 7 |
| GO:00436<br>18 | regulation of transcription from RNA polymerase II promoter in response to stress | 1.44897E-<br>05 | 8.76881E-<br>05 | 7 |
| GO:00030<br>12 | muscle system process                                                             | 1.5128E-<br>05  | 9.11434E-<br>05 | 7 |
| GO:00508<br>90 | cognition                                                                         | 1.52164E-<br>05 | 9.11434E-<br>05 | 7 |
| GO:00718<br>67 | response to monoamine                                                             | 1.52667E-<br>05 | 9.11434E-<br>05 | 7 |
| GO:00718<br>69 | response to catecholamine                                                         | 1.52667E-<br>05 | 9.11434E-<br>05 | 7 |
| GO:00069<br>40 | regulation of smooth muscle contraction                                           | 1.53629E-<br>05 | 9.11434E-<br>05 | 7 |
| GO:00357<br>94 | positive regulation of mitochondrial membrane permeability                        | 1.53629E-<br>05 | 9.11434E-<br>05 | 7 |
| GO:00025<br>26 | acute inflammatory response                                                       | 1.6077E-<br>05  | 9.49644E-<br>05 | 7 |
| GO:00016<br>54 | eye development                                                                   | 1.61119E-<br>05 | 9.49644E-<br>05 | 7 |

|                |                                                                                 |                 |                 |   |
|----------------|---------------------------------------------------------------------------------|-----------------|-----------------|---|
| GO:00342<br>50 | positive regulation of cellular amide metabolic process                         | 1.62784E-<br>05 | 9.5634E-<br>05  | 7 |
| GO:00101<br>65 | response to X-ray                                                               | 1.64251E-<br>05 | 9.6184E-<br>05  | 7 |
| GO:00468<br>24 | positive regulation of nucleocytoplasmic transport                              | 1.65592E-<br>05 | 9.63456E-<br>05 | 7 |
| GO:19021<br>08 | regulation of mitochondrial membrane permeability involved in apoptotic process | 1.65592E-<br>05 | 9.63456E-<br>05 | 7 |
| GO:00092<br>66 | response to temperature stimulus                                                | 1.68964E-<br>05 | 9.79923E-<br>05 | 7 |
| GO:00316<br>52 | positive regulation of heat generation                                          | 1.74188E-<br>05 | 0.0001003<br>78 | 7 |
| GO:00421<br>35 | neurotransmitter catabolic process                                              | 1.74188E-<br>05 | 0.0001003<br>78 | 7 |
| GO:01500<br>63 | visual system development                                                       | 1.7614E-<br>05  | 0.0001011<br>81 | 7 |
| GO:00016<br>76 | long-chain fatty acid metabolic process                                         | 1.78018E-<br>05 | 0.0001012<br>96 | 7 |
| GO:19000<br>15 | regulation of cytokine production involved in inflammatory response             | 1.78269E-<br>05 | 0.0001012<br>96 | 7 |
| GO:19057<br>10 | positive regulation of membrane permeability                                    | 1.78269E-<br>05 | 0.0001012<br>96 | 7 |
| GO:00015<br>05 | regulation of neurotransmitter levels                                           | 1.79698E-<br>05 | 0.0001012<br>96 | 7 |
| GO:00454<br>44 | fat cell differentiation                                                        | 1.79698E-<br>05 | 0.0001012<br>96 | 7 |
| GO:00714<br>53 | cellular response to oxygen levels                                              | 1.79698E-<br>05 | 0.0001012<br>96 | 7 |
| GO:00313<br>31 | positive regulation of cellular catabolic process                               | 1.84093E-<br>05 | 0.0001031<br>3  | 7 |
| GO:00426<br>92 | muscle cell differentiation                                                     | 1.84093E-<br>05 | 0.0001031<br>3  | 7 |
| GO:00324<br>11 | positive regulation of transporter activity                                     | 1.87185E-<br>05 | 0.0001045<br>39 | 7 |
| GO:00400<br>14 | regulation of multicellular organism growth                                     | 1.9169E-<br>05  | 0.0001067<br>25 | 7 |
| GO:00105<br>94 | regulation of endothelial cell migration                                        | 1.96871E-<br>05 | 0.0001092<br>74 | 7 |
| GO:00016<br>67 | ameboidal-type cell migration                                                   | 1.98848E-<br>05 | 0.0001100<br>34 | 7 |
| GO:00488<br>80 | sensory system development                                                      | 2.0093E-<br>05  | 0.0001108<br>47 | 7 |
| GO:00706<br>61 | leukocyte proliferation                                                         | 2.01953E-<br>05 | 0.0001110<br>72 | 7 |

|            |                                                                                   |             |             |   |
|------------|-----------------------------------------------------------------------------------|-------------|-------------|---|
| GO:0006937 | regulation of muscle contraction                                                  | 2.04512E-05 | 0.000112139 | 7 |
| GO:0042698 | ovulation cycle                                                                   | 2.05883E-05 | 0.00011255  | 7 |
| GO:0010959 | regulation of metal ion transport                                                 | 2.09834E-05 | 0.000114364 | 7 |
| GO:0001659 | temperature homeostasis                                                           | 2.12257E-05 | 0.000114992 | 7 |
| GO:0010469 | regulation of signaling receptor activity                                         | 2.12257E-05 | 0.000114992 | 7 |
| GO:0018107 | peptidyl-threonine phosphorylation                                                | 2.16994E-05 | 0.000117207 | 7 |
| GO:0002534 | cytokine production involved in inflammatory response                             | 2.20882E-05 | 0.000118952 | 7 |
| GO:0007569 | cell aging                                                                        | 2.27739E-05 | 0.000122281 | 7 |
| GO:1904031 | positive regulation of cyclin-dependent protein kinase activity                   | 2.36531E-05 | 0.000126626 | 7 |
| GO:0046660 | female sex differentiation                                                        | 2.38909E-05 | 0.000127522 | 7 |
| GO:0045765 | regulation of angiogenesis                                                        | 2.43724E-05 | 0.000129709 | 7 |
| GO:0072330 | monocarboxylic acid biosynthetic process                                          | 2.49543E-05 | 0.000132417 | 7 |
| GO:0048469 | cell maturation                                                                   | 2.54705E-05 | 0.000134761 | 7 |
| GO:0045742 | positive regulation of epidermal growth factor receptor signaling pathway         | 2.65119E-05 | 0.000139051 | 7 |
| GO:1901099 | negative regulation of signal transduction in absence of ligand                   | 2.65119E-05 | 0.000139051 | 7 |
| GO:2001240 | negative regulation of extrinsic apoptotic signaling pathway in absence of ligand | 2.65119E-05 | 0.000139051 | 7 |
| GO:0070227 | lymphocyte apoptotic process                                                      | 2.71024E-05 | 0.000140923 | 6 |
| GO:0072401 | signal transduction involved in DNA integrity checkpoint                          | 2.71024E-05 | 0.000140923 | 6 |
| GO:0072422 | signal transduction involved in DNA damage checkpoint                             | 2.71024E-05 | 0.000140923 | 6 |
| GO:0010950 | positive regulation of endopeptidase activity                                     | 2.73535E-05 | 0.000141821 | 6 |
| GO:0045471 | response to ethanol                                                               | 2.75092E-05 | 0.000142221 | 6 |
| GO:0051881 | regulation of mitochondrial membrane potential                                    | 2.89564E-05 | 0.000148852 | 6 |

|                |                                                                  |                 |                 |   |
|----------------|------------------------------------------------------------------|-----------------|-----------------|---|
| GO:00723<br>95 | signal transduction involved in cell cycle checkpoint            | 2.89564E-<br>05 | 0.0001488<br>52 | 6 |
| GO:00421<br>13 | B cell activation                                                | 2.91721E-<br>05 | 0.0001495<br>36 | 6 |
| GO:19030<br>34 | regulation of response to wounding                               | 2.93498E-<br>05 | 0.0001500<br>22 | 6 |
| GO:00609<br>69 | negative regulation of gene silencing                            | 2.96162E-<br>05 | 0.0001509<br>57 | 6 |
| GO:00106<br>23 | programmed cell death involved in cell development               | 2.9982E-<br>05  | 0.0001515<br>41 | 6 |
| GO:00193<br>36 | phenol-containing compound catabolic process                     | 2.9982E-<br>05  | 0.0001515<br>41 | 6 |
| GO:00316<br>50 | regulation of heat generation                                    | 2.9982E-<br>05  | 0.0001515<br>41 | 6 |
| GO:00026<br>88 | regulation of leukocyte chemotaxis                               | 3.01572E-<br>05 | 0.0001520<br>02 | 6 |
| GO:00359<br>24 | cellular response to vascular endothelial growth factor stimulus | 3.09074E-<br>05 | 0.0001553<br>5  | 6 |
| GO:00193<br>18 | hexose metabolic process                                         | 3.13563E-<br>05 | 0.0001571<br>7  | 6 |
| GO:00019<br>52 | regulation of cell-matrix adhesion                               | 3.15559E-<br>05 | 0.0001577<br>34 | 6 |
| GO:00430<br>29 | T cell homeostasis                                               | 3.29787E-<br>05 | 0.0001630<br>28 | 6 |
| GO:19011<br>86 | positive regulation of ERBB signaling pathway                    | 3.29787E-<br>05 | 0.0001630<br>28 | 6 |
| GO:20001<br>44 | positive regulation of DNA-templated transcription, initiation   | 3.29787E-<br>05 | 0.0001630<br>28 | 6 |
| GO:00182<br>10 | peptidyl-threonine modification                                  | 3.30063E-<br>05 | 0.0001630<br>28 | 6 |
| GO:00488<br>72 | homeostasis of number of cells                                   | 3.31556E-<br>05 | 0.0001630<br>28 | 6 |
| GO:00902<br>57 | regulation of muscle system process                              | 3.31556E-<br>05 | 0.0001630<br>28 | 6 |
| GO:00714<br>78 | cellular response to radiation                                   | 3.48707E-<br>05 | 0.0001709<br>96 | 6 |
| GO:00469<br>02 | regulation of mitochondrial membrane permeability                | 3.51144E-<br>05 | 0.0001712<br>63 | 6 |
| GO:01500<br>76 | neuroinflammatory response                                       | 3.51144E-<br>05 | 0.0001712<br>63 | 6 |
| GO:00072<br>10 | serotonin receptor signaling pathway                             | 3.66127E-<br>05 | 0.0001780<br>9  | 6 |
| GO:00714<br>82 | cellular response to light stimulus                              | 3.76817E-<br>05 | 0.0001827<br>99 | 6 |

|                |                                                                 |                 |                 |   |
|----------------|-----------------------------------------------------------------|-----------------|-----------------|---|
| GO:00903<br>99 | replicative senescence                                          | 3.80256E-<br>05 | 0.0001839<br>74 | 6 |
| GO:00459<br>30 | negative regulation of mitotic cell cycle                       | 3.94982E-<br>05 | 0.0001905<br>89 | 6 |
| GO:00456<br>37 | regulation of myeloid cell differentiation                      | 4.01491E-<br>05 | 0.0001927<br>02 | 6 |
| GO:00507<br>30 | regulation of peptidyl-tyrosine phosphorylation                 | 4.01491E-<br>05 | 0.0001927<br>02 | 6 |
| GO:00165<br>72 | histone phosphorylation                                         | 4.05312E-<br>05 | 0.0001940<br>22 | 6 |
| GO:00324<br>12 | regulation of ion transmembrane transporter activity            | 4.23598E-<br>05 | 0.0002022<br>4  | 6 |
| GO:00719<br>02 | positive regulation of protein serine/threonine kinase activity | 4.32396E-<br>05 | 0.0002058<br>97 | 6 |
| GO:00507<br>31 | positive regulation of peptidyl-tyrosine phosphorylation        | 4.40101E-<br>05 | 0.0002090<br>16 | 6 |
| GO:00723<br>31 | signal transduction by p53 class mediator                       | 4.46712E-<br>05 | 0.0002116<br>01 | 6 |
| GO:19040<br>62 | regulation of cation transmembrane transport                    | 4.72767E-<br>05 | 0.0002224<br>8  | 6 |
| GO:19001<br>19 | positive regulation of execution phase of apoptosis             | 4.73661E-<br>05 | 0.0002224<br>8  | 6 |
| GO:20004<br>02 | negative regulation of lymphocyte migration                     | 4.73661E-<br>05 | 0.0002224<br>8  | 6 |
| GO:00226<br>17 | extracellular matrix disassembly                                | 4.75828E-<br>05 | 0.0002224<br>8  | 6 |
| GO:00301<br>93 | regulation of blood coagulation                                 | 4.75828E-<br>05 | 0.0002224<br>8  | 6 |
| GO:19019<br>88 | negative regulation of cell cycle phase transition              | 4.83354E-<br>05 | 0.0002254<br>17 | 6 |
| GO:00485<br>65 | digestive tract development                                     | 4.86259E-<br>05 | 0.0002261<br>88 | 6 |
| GO:19000<br>46 | regulation of hemostasis                                        | 5.04416E-<br>05 | 0.0002340<br>32 | 6 |
| GO:00108<br>76 | lipid localization                                              | 5.12107E-<br>05 | 0.0002369<br>93 | 6 |
| GO:00097<br>55 | hormone-mediated signaling pathway                              | 5.16736E-<br>05 | 0.0002385<br>26 | 6 |
| GO:00158<br>44 | monoamine transport                                             | 5.34313E-<br>05 | 0.0002460<br>12 | 6 |
| GO:00459<br>27 | positive regulation of growth                                   | 5.36084E-<br>05 | 0.0002462       | 6 |
| GO:01500<br>77 | regulation of neuroinflammatory response                        | 5.41309E-<br>05 | 0.0002479<br>71 | 6 |

|            |                                                                                           |             |             |   |
|------------|-------------------------------------------------------------------------------------------|-------------|-------------|---|
| GO:0006970 | response to osmotic stress                                                                | 5.65562E-05 | 0.000257128 | 6 |
| GO:0010507 | negative regulation of autophagy                                                          | 5.65562E-05 | 0.000257128 | 6 |
| GO:0043154 | negative regulation of cysteine-type endopeptidase activity involved in apoptotic process | 5.65562E-05 | 0.000257128 | 6 |
| GO:0043401 | steroid hormone mediated signaling pathway                                                | 5.72389E-05 | 0.00025958  | 6 |
| GO:0002070 | epithelial cell maturation                                                                | 5.80932E-05 | 0.00026214  | 6 |
| GO:0019372 | lipoxigenase pathway                                                                      | 5.80932E-05 | 0.00026214  | 6 |
| GO:1903708 | positive regulation of hemopoiesis                                                        | 5.85635E-05 | 0.000263605 | 6 |
| GO:0007193 | adenylate cyclase-inhibiting G protein-coupled receptor signaling pathway                 | 5.98204E-05 | 0.000268594 | 6 |
| GO:0007586 | digestion                                                                                 | 6.19806E-05 | 0.000276919 | 6 |
| GO:0008584 | male gonad development                                                                    | 6.19806E-05 | 0.000276919 | 6 |
| GO:0071383 | cellular response to steroid hormone stimulus                                             | 6.22805E-05 | 0.000277574 | 6 |
| GO:0002687 | positive regulation of leukocyte migration                                                | 6.44664E-05 | 0.000284921 | 6 |
| GO:0007292 | female gamete generation                                                                  | 6.44664E-05 | 0.000284921 | 6 |
| GO:0046546 | development of primary male sexual characteristics                                        | 6.44664E-05 | 0.000284921 | 6 |
| GO:0051204 | protein insertion into mitochondrial membrane                                             | 6.48739E-05 | 0.000284921 | 6 |
| GO:0060443 | mammary gland morphogenesis                                                               | 6.48739E-05 | 0.000284921 | 6 |
| GO:0070266 | necroptotic process                                                                       | 6.48739E-05 | 0.000284921 | 6 |
| GO:0009896 | positive regulation of catabolic process                                                  | 6.65094E-05 | 0.000291189 | 6 |
| GO:0050818 | regulation of coagulation                                                                 | 6.67838E-05 | 0.000291189 | 6 |
| GO:0090559 | regulation of membrane permeability                                                       | 6.67838E-05 | 0.000291189 | 6 |
| GO:0050921 | positive regulation of chemotaxis                                                         | 6.96769E-05 | 0.000302133 | 6 |
| GO:0060078 | regulation of postsynaptic membrane potential                                             | 6.96769E-05 | 0.000302133 | 6 |

|            |                                                                                            |             |             |   |
|------------|--------------------------------------------------------------------------------------------|-------------|-------------|---|
| GO:0006109 | regulation of carbohydrate metabolic process                                               | 7.02946E-05 | 0.000302133 | 6 |
| GO:0010224 | response to UV-B                                                                           | 7.02956E-05 | 0.000302133 | 6 |
| GO:0070242 | thymocyte apoptotic process                                                                | 7.02956E-05 | 0.000302133 | 6 |
| GO:2001267 | regulation of cysteine-type endopeptidase activity involved in apoptotic signaling pathway | 7.02956E-05 | 0.000302133 | 6 |
| GO:2000142 | regulation of DNA-templated transcription, initiation                                      | 7.07914E-05 | 0.000303543 | 6 |
| GO:0043542 | endothelial cell migration                                                                 | 7.23875E-05 | 0.000309653 | 6 |
| GO:0000082 | G1/S transition of mitotic cell cycle                                                      | 7.41724E-05 | 0.00031654  | 6 |
| GO:1901215 | negative regulation of neuron death                                                        | 7.46069E-05 | 0.000317645 | 6 |
| GO:0030225 | macrophage differentiation                                                                 | 7.70925E-05 | 0.000325927 | 6 |
| GO:0045776 | negative regulation of blood pressure                                                      | 7.70925E-05 | 0.000325927 | 6 |
| GO:0046677 | response to antibiotic                                                                     | 7.70925E-05 | 0.000325927 | 6 |
| GO:0018108 | peptidyl-tyrosine phosphorylation                                                          | 8.0443E-05  | 0.0003393   | 6 |
| GO:0070374 | positive regulation of ERK1 and ERK2 cascade                                               | 8.14787E-05 | 0.000342869 | 6 |
| GO:0009409 | response to cold                                                                           | 8.37921E-05 | 0.000350971 | 6 |
| GO:2001239 | regulation of extrinsic apoptotic signaling pathway in absence of ligand                   | 8.37921E-05 | 0.000350971 | 6 |
| GO:0042136 | neurotransmitter biosynthetic process                                                      | 8.40603E-05 | 0.000351282 | 6 |
| GO:0018212 | peptidyl-tyrosine modification                                                             | 8.54949E-05 | 0.000356453 | 6 |
| GO:0010810 | regulation of cell-substrate adhesion                                                      | 8.63406E-05 | 0.000359152 | 6 |
| GO:0002532 | production of molecular mediator involved in inflammatory response                         | 8.69358E-05 | 0.000359683 | 6 |
| GO:2000117 | negative regulation of cysteine-type endopeptidase activity                                | 8.69358E-05 | 0.000359683 | 6 |
| GO:0060249 | anatomical structure homeostasis                                                           | 8.70646E-05 | 0.000359683 | 6 |
| GO:0034976 | response to endoplasmic reticulum stress                                                   | 8.77203E-05 | 0.000361566 | 6 |



|                |                                                                              |                 |                 |   |
|----------------|------------------------------------------------------------------------------|-----------------|-----------------|---|
| GO:00026<br>73 | regulation of acute inflammatory response                                    | 9.09052E-<br>05 | 0.0003694<br>6  | 6 |
| GO:00032<br>54 | regulation of membrane depolarization                                        | 9.09052E-<br>05 | 0.0003694<br>6  | 6 |
| GO:00351<br>96 | production of miRNAs involved in gene silencing by miRNA                     | 9.09052E-<br>05 | 0.0003694<br>6  | 6 |
| GO:00607<br>11 | labyrinthine layer development                                               | 9.09052E-<br>05 | 0.0003694<br>6  | 6 |
| GO:00901<br>51 | establishment of protein localization to mitochondrial membrane              | 9.09052E-<br>05 | 0.0003694<br>6  | 6 |
| GO:00901<br>99 | regulation of release of cytochrome c from mitochondria                      | 9.09052E-<br>05 | 0.0003694<br>6  | 6 |
| GO:00000<br>75 | cell cycle checkpoint                                                        | 9.14367E-<br>05 | 0.0003694<br>6  | 6 |
| GO:00515<br>91 | response to cAMP                                                             | 9.1473E-<br>05  | 0.0003694<br>6  | 6 |
| GO:19040<br>35 | regulation of epithelial cell apoptotic process                              | 9.1473E-<br>05  | 0.0003694<br>6  | 6 |
| GO:00059<br>96 | monosaccharide metabolic process                                             | 9.19479E-<br>05 | 0.0003705<br>51 | 6 |
| GO:00713<br>56 | cellular response to tumor necrosis factor                                   | 9.41243E-<br>05 | 0.0003784<br>79 | 6 |
| GO:00030<br>73 | regulation of systemic arterial blood pressure                               | 9.61902E-<br>05 | 0.0003859<br>28 | 6 |
| GO:00030<br>44 | regulation of systemic arterial blood pressure mediated by a chemical signal | 9.84473E-<br>05 | 0.0003932<br>4  | 6 |
| GO:00508<br>73 | brown fat cell differentiation                                               | 9.84473E-<br>05 | 0.0003932<br>4  | 6 |
| GO:00022<br>62 | myeloid cell homeostasis                                                     | 0.0001010<br>03 | 0.0004011<br>48 | 6 |
| GO:00620<br>13 | positive regulation of small molecule metabolic process                      | 0.0001010<br>03 | 0.0004011<br>48 | 6 |
| GO:00026<br>90 | positive regulation of leukocyte chemotaxis                                  | 0.0001010<br>92 | 0.0004011<br>48 | 6 |
| GO:00364<br>73 | cell death in response to oxidative stress                                   | 0.0001061<br>84 | 0.0004204<br>31 | 6 |
| GO:00069<br>84 | ER-nucleus signaling pathway                                                 | 0.0001064<br>34 | 0.0004205       | 6 |
| GO:00485<br>92 | eye morphogenesis                                                            | 0.0001084<br>36 | 0.0004274<br>77 | 6 |
| GO:00703<br>72 | regulation of ERK1 and ERK2 cascade                                          | 0.0001157<br>07 | 0.0004549<br>51 | 6 |
| GO:00301<br>68 | platelet activation                                                          | 0.0001162<br>97 | 0.0004549<br>51 | 6 |

|                |                                                                         |                 |                 |   |
|----------------|-------------------------------------------------------------------------|-----------------|-----------------|---|
| GO:00030<br>85 | negative regulation of systemic arterial blood pressure                 | 0.0001166<br>19 | 0.0004549<br>51 | 6 |
| GO:19020<br>04 | positive regulation of amyloid-beta formation                           | 0.0001166<br>19 | 0.0004549<br>51 | 6 |
| GO:19019<br>87 | regulation of cell cycle phase transition                               | 0.0001166<br>62 | 0.0004549<br>51 | 6 |
| GO:00070<br>44 | cell-substrate junction assembly                                        | 0.0001169<br>56 | 0.0004551<br>16 | 6 |
| GO:00509<br>20 | regulation of chemotaxis                                                | 0.0001207<br>35 | 0.0004688<br>13 | 6 |
| GO:00439<br>49 | regulation of cAMP-mediated signaling                                   | 0.0001238<br>02 | 0.0004785<br>72 | 6 |
| GO:00071<br>60 | cell-matrix adhesion                                                    | 0.0001240<br>42 | 0.0004785<br>72 | 5 |
| GO:00986<br>57 | import into cell                                                        | 0.0001240<br>42 | 0.0004785<br>72 | 5 |
| GO:00160<br>49 | cell growth                                                             | 0.0001247<br>47 | 0.0004802<br>7  | 5 |
| GO:00448<br>43 | cell cycle G1/S phase transition                                        | 0.0001265<br>34 | 0.0004861<br>16 | 5 |
| GO:00447<br>73 | mitotic DNA damage checkpoint                                           | 0.0001285<br>48 | 0.0004928<br>05 | 5 |
| GO:00347<br>67 | positive regulation of ion transmembrane transport                      | 0.0001289<br>3  | 0.0004932<br>27 | 5 |
| GO:00603<br>26 | cell chemotaxis                                                         | 0.0001293<br>68 | 0.0004938<br>58 | 5 |
| GO:00308<br>57 | negative regulation of epithelial cell differentiation                  | 0.0001332<br>15 | 0.0005053<br>46 | 5 |
| GO:00310<br>50 | dsRNA processing                                                        | 0.0001332<br>15 | 0.0005053<br>46 | 5 |
| GO:00709<br>18 | production of small RNA involved in gene silencing by RNA               | 0.0001332<br>15 | 0.0005053<br>46 | 5 |
| GO:00000<br>79 | regulation of cyclin-dependent protein serine/threonine kinase activity | 0.0001346<br>64 | 0.0005087<br>06 | 5 |
| GO:01501<br>15 | cell-substrate junction organization                                    | 0.0001346<br>64 | 0.0005087<br>06 | 5 |
| GO:00610<br>42 | vascular wound healing                                                  | 0.0001355<br>81 | 0.0005100<br>44 | 5 |
| GO:00903<br>30 | regulation of platelet aggregation                                      | 0.0001355<br>81 | 0.0005100<br>44 | 5 |
| GO:00716<br>95 | anatomical structure maturation                                         | 0.0001417       | 0.0005319<br>55 | 5 |
| GO:00466<br>61 | male sex differentiation                                                | 0.0001426<br>3  | 0.0005343<br>36 | 5 |

|                |                                                                                               |                 |                 |   |
|----------------|-----------------------------------------------------------------------------------------------|-----------------|-----------------|---|
| GO:00432<br>79 | response to alkaloid                                                                          | 0.0001475<br>62 | 0.0005516<br>74 | 5 |
| GO:00069<br>77 | DNA damage response, signal transduction by p53 class mediator resulting in cell cycle arrest | 0.0001535<br>82 | 0.0005706<br>41 | 5 |
| GO:00103<br>32 | response to gamma radiation                                                                   | 0.0001535<br>82 | 0.0005706<br>41 | 5 |
| GO:19046<br>45 | response to amyloid-beta                                                                      | 0.0001535<br>82 | 0.0005706<br>41 | 5 |
| GO:00510<br>00 | positive regulation of nitric-oxide synthase activity                                         | 0.0001564<br>42 | 0.0005788<br>9  | 5 |
| GO:00519<br>00 | regulation of mitochondrial depolarization                                                    | 0.0001564<br>42 | 0.0005788<br>9  | 5 |
| GO:00711<br>56 | regulation of cell cycle arrest                                                               | 0.0001613<br>86 | 0.0005947<br>52 | 5 |
| GO:19040<br>29 | regulation of cyclin-dependent protein kinase activity                                        | 0.0001613<br>86 | 0.0005947<br>52 | 5 |
| GO:00072<br>04 | positive regulation of cytosolic calcium ion concentration                                    | 0.0001641<br>61 | 0.0006015<br>75 | 5 |
| GO:00015<br>41 | ovarian follicle development                                                                  | 0.0001645<br>67 | 0.0006015<br>75 | 5 |
| GO:00724<br>31 | signal transduction involved in mitotic G1 DNA damage checkpoint                              | 0.0001645<br>67 | 0.0006015<br>75 | 5 |
| GO:19024<br>00 | intracellular signal transduction involved in G1 DNA damage checkpoint                        | 0.0001645<br>67 | 0.0006015<br>75 | 5 |
| GO:20002<br>41 | regulation of reproductive process                                                            | 0.0001734<br>82 | 0.0006328<br>84 | 5 |
| GO:00703<br>71 | ERK1 and ERK2 cascade                                                                         | 0.0001748<br>83 | 0.0006367<br>14 | 5 |
| GO:00075<br>66 | embryo implantation                                                                           | 0.0001761<br>09 | 0.0006388<br>57 | 5 |
| GO:00447<br>74 | mitotic DNA integrity checkpoint                                                              | 0.0001761<br>78 | 0.0006388<br>57 | 5 |
| GO:00075<br>84 | response to nutrient                                                                          | 0.0001791       | 0.0006462<br>22 | 5 |
| GO:00351<br>62 | embryonic hemopoiesis                                                                         | 0.0001792<br>81 | 0.0006462<br>22 | 5 |
| GO:19049<br>96 | positive regulation of leukocyte adhesion to vascular endothelial cell                        | 0.0001792<br>81 | 0.0006462<br>22 | 5 |
| GO:00508<br>06 | positive regulation of synaptic transmission                                                  | 0.0001848<br>62 | 0.0006650<br>15 | 5 |
| GO:00724<br>13 | signal transduction involved in mitotic cell cycle checkpoint                                 | 0.0001882<br>24 | 0.0006730<br>95 | 5 |
| GO:19024<br>02 | signal transduction involved in mitotic DNA damage checkpoint                                 | 0.0001882<br>24 | 0.0006730<br>95 | 5 |

|                |                                                                                            |                 |                 |   |
|----------------|--------------------------------------------------------------------------------------------|-----------------|-----------------|---|
| GO:19024<br>03 | signal transduction involved in mitotic DNA integrity checkpoint                           | 0.0001882<br>24 | 0.0006730<br>95 | 5 |
| GO:00015<br>58 | regulation of cell growth                                                                  | 0.0001928<br>1  | 0.0006881<br>35 | 5 |
| GO:00016<br>55 | urogenital system development                                                              | 0.0001940<br>35 | 0.0006911<br>43 | 5 |
| GO:00509<br>94 | regulation of lipid catabolic process                                                      | 0.0002009<br>29 | 0.0007142<br>94 | 5 |
| GO:00430<br>10 | camera-type eye development                                                                | 0.0002021<br>63 | 0.0007172<br>73 | 5 |
| GO:00360<br>03 | positive regulation of transcription from RNA polymerase II promoter in response to stress | 0.0002041<br>78 | 0.0007173<br>88 | 5 |
| GO:00509<br>95 | negative regulation of lipid catabolic process                                             | 0.0002041<br>78 | 0.0007173<br>88 | 5 |
| GO:00518<br>82 | mitochondrial depolarization                                                               | 0.0002041<br>78 | 0.0007173<br>88 | 5 |
| GO:00604<br>44 | branching involved in mammary gland duct morphogenesis                                     | 0.0002041<br>78 | 0.0007173<br>88 | 5 |
| GO:19029<br>93 | positive regulation of amyloid precursor protein catabolic process                         | 0.0002041<br>78 | 0.0007173<br>88 | 5 |
| GO:00162<br>41 | regulation of macroautophagy                                                               | 0.0002093<br>89 | 0.0007342<br>71 | 5 |
| GO:19019<br>91 | negative regulation of mitotic cell cycle phase transition                                 | 0.0002123<br>9  | 0.0007433<br>54 | 5 |
| GO:00068<br>16 | calcium ion transport                                                                      | 0.0002142<br>29 | 0.0007483<br>44 | 5 |
| GO:00487<br>71 | tissue remodeling                                                                          | 0.0002225<br>79 | 0.0007757<br>64 | 5 |
| GO:00316<br>68 | cellular response to extracellular stimulus                                                | 0.0002229<br>36 | 0.0007757<br>64 | 5 |
| GO:00308<br>88 | regulation of B cell proliferation                                                         | 0.0002281<br>77 | 0.0007870<br>88 | 5 |
| GO:00705<br>27 | platelet aggregation                                                                       | 0.0002281<br>77 | 0.0007870<br>88 | 5 |
| GO:20003<br>51 | regulation of endothelial cell apoptotic process                                           | 0.0002281<br>77 | 0.0007870<br>88 | 5 |
| GO:20012<br>44 | positive regulation of intrinsic apoptotic signaling pathway                               | 0.0002281<br>77 | 0.0007870<br>88 | 5 |
| GO:20000<br>27 | regulation of animal organ morphogenesis                                                   | 0.0002283<br>66 | 0.0007870<br>88 | 5 |
| GO:00158<br>74 | norepinephrine transport                                                                   | 0.0002312<br>12 | 0.0007953<br>84 | 5 |
| GO:00486<br>40 | negative regulation of developmental growth                                                | 0.0002362<br>38 | 0.0008111<br>31 | 5 |

|                |                                                                                                              |                 |                 |   |
|----------------|--------------------------------------------------------------------------------------------------------------|-----------------|-----------------|---|
| GO:00507<br>96 | regulation of insulin secretion                                                                              | 0.0002435<br>84 | 0.0008331<br>91 | 5 |
| GO:19053<br>30 | regulation of morphogenesis of an epithelium                                                                 | 0.0002435<br>84 | 0.0008331<br>91 | 5 |
| GO:00313<br>34 | positive regulation of protein-containing complex assembly                                                   | 0.0002452<br>97 | 0.0008374<br>7  | 5 |
| GO:00305<br>18 | intracellular steroid hormone receptor signaling pathway                                                     | 0.0002459<br>48 | 0.0008381<br>11 | 5 |
| GO:00075<br>96 | blood coagulation                                                                                            | 0.0002520<br>4  | 0.0008556<br>46 | 5 |
| GO:00107<br>21 | negative regulation of cell development                                                                      | 0.0002520<br>4  | 0.0008556<br>46 | 5 |
| GO:19040<br>19 | epithelial cell apoptotic process                                                                            | 0.0002559<br>59 | 0.0008673<br>26 | 5 |
| GO:00020<br>66 | columnar/cuboidal epithelial cell development                                                                | 0.0002579<br>88 | 0.0008711<br>55 | 5 |
| GO:00063<br>09 | apoptotic DNA fragmentation                                                                                  | 0.0002604<br>6  | 0.0008711<br>55 | 5 |
| GO:00439<br>51 | negative regulation of cAMP-mediated signaling                                                               | 0.0002604<br>6  | 0.0008711<br>55 | 5 |
| GO:00603<br>07 | regulation of ventricular cardiac muscle cell membrane repolarization                                        | 0.0002604<br>6  | 0.0008711<br>55 | 5 |
| GO:00607<br>40 | prostate gland epithelium morphogenesis                                                                      | 0.0002604<br>6  | 0.0008711<br>55 | 5 |
| GO:19007<br>39 | regulation of protein insertion into mitochondrial membrane involved in apoptotic signaling pathway          | 0.0002604<br>6  | 0.0008711<br>55 | 5 |
| GO:19007<br>40 | positive regulation of protein insertion into mitochondrial membrane involved in apoptotic signaling pathway | 0.0002604<br>6  | 0.0008711<br>55 | 5 |
| GO:00076<br>11 | learning or memory                                                                                           | 0.0002632<br>28 | 0.0008787<br>89 | 5 |
| GO:00335<br>59 | unsaturated fatty acid metabolic process                                                                     | 0.0002662<br>77 | 0.0008873<br>33 | 5 |
| GO:00018<br>94 | tissue homeostasis                                                                                           | 0.0002694<br>34 | 0.0008962<br>01 | 5 |
| GO:00105<br>73 | vascular endothelial growth factor production                                                                | 0.0002738<br>97 | 0.0009077<br>11 | 5 |
| GO:00512<br>05 | protein insertion into membrane                                                                              | 0.0002738<br>97 | 0.0009077<br>11 | 5 |
| GO:00075<br>99 | hemostasis                                                                                                   | 0.0002778<br>3  | 0.0009190<br>62 | 5 |
| GO:00508<br>17 | coagulation                                                                                                  | 0.0002832<br>39 | 0.0009352<br>45 | 5 |
| GO:00096<br>51 | response to salt stress                                                                                      | 0.0002919<br>96 | 0.0009606<br>54 | 5 |

|                |                                                                              |                 |                 |   |
|----------------|------------------------------------------------------------------------------|-----------------|-----------------|---|
| GO:19021<br>75 | regulation of oxidative stress-induced intrinsic apoptotic signaling pathway | 0.0002919<br>96 | 0.0009606<br>54 | 5 |
| GO:00020<br>65 | columnar/cuboidal epithelial cell differentiation                            | 0.0002991<br>35 | 0.0009788       | 5 |
| GO:00109<br>06 | regulation of glucose metabolic process                                      | 0.0002991<br>35 | 0.0009788       | 5 |
| GO:01202<br>54 | olefinic compound metabolic process                                          | 0.0002991<br>35 | 0.0009788       | 5 |
| GO:00507<br>08 | regulation of protein secretion                                              | 0.0002999<br>86 | 0.0009798<br>13 | 5 |
| GO:00509<br>18 | positive chemotaxis                                                          | 0.0003078<br>12 | 0.0010035<br>65 | 5 |
| GO:19019<br>90 | regulation of mitotic cell cycle phase transition                            | 0.0003104<br>79 | 0.0010104<br>38 | 5 |
| GO:00432<br>54 | regulation of protein-containing complex assembly                            | 0.0003155<br>89 | 0.0010252<br>25 | 5 |
| GO:00027<br>61 | regulation of myeloid leukocyte differentiation                              | 0.0003226<br>89 | 0.0010382<br>08 | 5 |
| GO:00326<br>42 | regulation of chemokine production                                           | 0.0003258<br>53 | 0.0010382<br>08 | 5 |
| GO:00725<br>77 | endothelial cell apoptotic process                                           | 0.0003258<br>53 | 0.0010382<br>08 | 5 |
| GO:00023<br>60 | T cell lineage commitment                                                    | 0.0003258<br>97 | 0.0010382<br>08 | 5 |
| GO:00104<br>60 | positive regulation of heart rate                                            | 0.0003258<br>97 | 0.0010382<br>08 | 5 |
| GO:00105<br>75 | positive regulation of vascular endothelial growth factor production         | 0.0003258<br>97 | 0.0010382<br>08 | 5 |
| GO:00328<br>00 | receptor biosynthetic process                                                | 0.0003258<br>97 | 0.0010382<br>08 | 5 |
| GO:00335<br>98 | mammary gland epithelial cell proliferation                                  | 0.0003258<br>97 | 0.0010382<br>08 | 5 |
| GO:00605<br>12 | prostate gland morphogenesis                                                 | 0.0003258<br>97 | 0.0010382<br>08 | 5 |
| GO:00902<br>00 | positive regulation of release of cytochrome c from mitochondria             | 0.0003258<br>97 | 0.0010382<br>08 | 5 |
| GO:19907<br>76 | response to angiotensin                                                      | 0.0003258<br>97 | 0.0010382<br>08 | 5 |
| GO:00514<br>80 | regulation of cytosolic calcium ion concentration                            | 0.0003296<br>93 | 0.0010484<br>56 | 5 |
| GO:00508<br>04 | modulation of chemical synaptic transmission                                 | 0.0003421<br>98 | 0.0010845<br>13 | 5 |
| GO:00109<br>48 | negative regulation of cell cycle process                                    | 0.0003422<br>3  | 0.0010845<br>13 | 5 |

|                |                                                                                  |                 |                 |   |
|----------------|----------------------------------------------------------------------------------|-----------------|-----------------|---|
| GO:00991<br>77 | regulation of trans-synaptic signaling                                           | 0.0003477<br>36 | 0.0011000<br>34 | 5 |
| GO:00157<br>21 | bile acid and bile salt transport                                                | 0.0003622<br>35 | 0.0011438<br>99 | 5 |
| GO:19054<br>75 | regulation of protein localization to membrane                                   | 0.0003631<br>32 | 0.0011447<br>33 | 5 |
| GO:19054<br>77 | positive regulation of protein localization to membrane                          | 0.0003739<br>89 | 0.0011769<br>09 | 5 |
| GO:00356<br>90 | cellular response to drug                                                        | 0.0003845<br>16 | 0.0012058<br>43 | 5 |
| GO:00429<br>82 | amyloid precursor protein metabolic process                                      | 0.0003845<br>16 | 0.0012058<br>43 | 5 |
| GO:00347<br>63 | negative regulation of transmembrane transport                                   | 0.0003877<br>25 | 0.0012138<br>04 | 5 |
| GO:00093<br>06 | protein secretion                                                                | 0.0003886<br>21 | 0.0012145<br>06 | 5 |
| GO:00434<br>91 | protein kinase B signaling                                                       | 0.0003942<br>7  | 0.0012294<br>86 | 5 |
| GO:00355<br>92 | establishment of protein localization to extracellular region                    | 0.0003947<br>73 | 0.0012294<br>86 | 5 |
| GO:00463<br>94 | carboxylic acid biosynthetic process                                             | 0.0003963<br>37 | 0.0012322<br>37 | 5 |
| GO:00059<br>79 | regulation of glycogen biosynthetic process                                      | 0.0004010<br>82 | 0.0012342<br>64 | 5 |
| GO:00109<br>62 | regulation of glucan biosynthetic process                                        | 0.0004010<br>82 | 0.0012342<br>64 | 5 |
| GO:00341<br>10 | regulation of homotypic cell-cell adhesion                                       | 0.0004010<br>82 | 0.0012342<br>64 | 5 |
| GO:00434<br>57 | regulation of cellular respiration                                               | 0.0004010<br>82 | 0.0012342<br>64 | 5 |
| GO:00600<br>55 | angiogenesis involved in wound healing                                           | 0.0004010<br>82 | 0.0012342<br>64 | 5 |
| GO:00996<br>25 | ventricular cardiac muscle cell membrane repolarization                          | 0.0004010<br>82 | 0.0012342<br>64 | 5 |
| GO:00160<br>53 | organic acid biosynthetic process                                                | 0.0004035<br>65 | 0.0012397<br>97 | 5 |
| GO:00059<br>77 | glycogen metabolic process                                                       | 0.0004275<br>88 | 0.0013113<br>72 | 5 |
| GO:00716<br>92 | protein localization to extracellular region                                     | 0.0004401<br>32 | 0.0013434<br>72 | 5 |
| GO:00327<br>70 | positive regulation of monooxygenase activity                                    | 0.0004425<br>09 | 0.0013434<br>72 | 5 |
| GO:00457<br>37 | positive regulation of cyclin-dependent protein serine/threonine kinase activity | 0.0004425<br>09 | 0.0013434<br>72 | 5 |

|                |                                                                                    |                 |                 |   |
|----------------|------------------------------------------------------------------------------------|-----------------|-----------------|---|
| GO:00459<br>87 | positive regulation of smooth muscle contraction                                   | 0.0004425<br>09 | 0.0013434<br>72 | 5 |
| GO:00996<br>23 | regulation of cardiac muscle cell membrane repolarization                          | 0.0004425<br>09 | 0.0013434<br>72 | 5 |
| GO:19001<br>81 | negative regulation of protein localization to nucleus                             | 0.0004425<br>09 | 0.0013434<br>72 | 5 |
| GO:00011<br>01 | response to acid chemical                                                          | 0.0004465<br>2  | 0.0013524<br>13 | 5 |
| GO:00708<br>38 | divalent metal ion transport                                                       | 0.0004469<br>49 | 0.0013524<br>13 | 5 |
| GO:00060<br>73 | cellular glucan metabolic process                                                  | 0.0004503<br>67 | 0.0013582<br>13 | 5 |
| GO:00440<br>42 | glucan metabolic process                                                           | 0.0004503<br>67 | 0.0013582<br>13 | 5 |
| GO:00513<br>46 | negative regulation of hydrolase activity                                          | 0.0004608<br>45 | 0.0013875       | 5 |
| GO:00311<br>00 | animal organ regeneration                                                          | 0.0004739<br>99 | 0.0014200<br>14 | 5 |
| GO:00326<br>02 | chemokine production                                                               | 0.0004739<br>99 | 0.0014200<br>14 | 5 |
| GO:00436<br>27 | response to estrogen                                                               | 0.0004739<br>99 | 0.0014200<br>14 | 5 |
| GO:00217<br>00 | developmental maturation                                                           | 0.0004770<br>15 | 0.0014266<br>88 | 5 |
| GO:00606<br>03 | mammary gland duct morphogenesis                                                   | 0.0004865<br>87 | 0.0014505<br>22 | 5 |
| GO:00988<br>10 | neurotransmitter reuptake                                                          | 0.0004865<br>87 | 0.0014505<br>22 | 5 |
| GO:00031<br>58 | endothelium development                                                            | 0.0004948<br>5  | 0.0014727<br>26 | 5 |
| GO:00725<br>11 | divalent inorganic cation transport                                                | 0.0004971<br>51 | 0.0014771<br>46 | 5 |
| GO:00468<br>90 | regulation of lipid biosynthetic process                                           | 0.0004984<br>77 | 0.0014786<br>56 | 5 |
| GO:00027<br>91 | regulation of peptide secretion                                                    | 0.0005077<br>13 | 0.0015035<br>91 | 5 |
| GO:00457<br>66 | positive regulation of angiogenesis                                                | 0.0005113<br>17 | 0.0015117<br>88 | 5 |
| GO:00614<br>18 | regulation of transcription from RNA polymerase II promoter in response to hypoxia | 0.0005238<br>92 | 0.0015464<br>42 | 5 |
| GO:00400<br>18 | positive regulation of multicellular organism growth                               | 0.0005333<br>84 | 0.0015693<br>39 | 5 |
| GO:19020<br>03 | regulation of amyloid-beta formation                                               | 0.0005333<br>84 | 0.0015693<br>39 | 5 |



|                |                                                             |                 |                 |   |
|----------------|-------------------------------------------------------------|-----------------|-----------------|---|
| GO:00421<br>10 | T cell activation                                           | 0.0005357<br>81 | 0.0015738<br>33 | 5 |
| GO:00610<br>45 | negative regulation of wound healing                        | 0.0005501<br>9  | 0.0016107<br>47 | 5 |
| GO:00723<br>32 | intrinsic apoptotic signaling pathway by p53 class mediator | 0.0005501<br>9  | 0.0016107<br>47 | 5 |
| GO:00705<br>55 | response to interleukin-1                                   | 0.0005513<br>9  | 0.0016107<br>47 | 5 |
| GO:00507<br>69 | positive regulation of neurogenesis                         | 0.0005519<br>08 | 0.0016107<br>47 | 5 |
| GO:00302<br>78 | regulation of ossification                                  | 0.0005652<br>77 | 0.0016471<br>07 | 5 |
| GO:00513<br>48 | negative regulation of transferase activity                 | 0.0005730<br>85 | 0.0016615<br>94 | 5 |
| GO:00068<br>09 | nitric oxide biosynthetic process                           | 0.0005774<br>13 | 0.0016615<br>94 | 5 |
| GO:00310<br>16 | pancreas development                                        | 0.0005774<br>13 | 0.0016615<br>94 | 5 |
| GO:00712<br>60 | cellular response to mechanical stimulus                    | 0.0005774<br>13 | 0.0016615<br>94 | 5 |
| GO:00903<br>98 | cellular senescence                                         | 0.0005774<br>13 | 0.0016615<br>94 | 5 |
| GO:00300<br>73 | insulin secretion                                           | 0.0005794<br>34 | 0.0016615<br>94 | 5 |
| GO:00902<br>76 | regulation of peptide hormone secretion                     | 0.0005794<br>34 | 0.0016615<br>94 | 5 |
| GO:00147<br>06 | striated muscle tissue development                          | 0.0005819<br>84 | 0.0016615<br>94 | 5 |
| GO:00007<br>37 | DNA catabolic process, endonucleolytic                      | 0.0005829<br>67 | 0.0016615<br>94 | 5 |
| GO:00356<br>33 | maintenance of blood-brain barrier                          | 0.0005829<br>67 | 0.0016615<br>94 | 5 |
| GO:00432<br>76 | anoikis                                                     | 0.0005829<br>67 | 0.0016615<br>94 | 5 |
| GO:00986<br>64 | G protein-coupled serotonin receptor signaling pathway      | 0.0005829<br>67 | 0.0016615<br>94 | 5 |
| GO:19026<br>92 | regulation of neuroblast proliferation                      | 0.0005829<br>67 | 0.0016615<br>94 | 5 |
| GO:00600<br>48 | cardiac muscle contraction                                  | 0.0005840<br>23 | 0.0016615<br>94 | 5 |
| GO:00726<br>55 | establishment of protein localization to mitochondrion      | 0.0005840<br>23 | 0.0016615<br>94 | 5 |
| GO:00486<br>78 | response to axon injury                                     | 0.0006055<br>8  | 0.0017175<br>26 | 5 |

|                |                                                        |                 |                 |   |
|----------------|--------------------------------------------------------|-----------------|-----------------|---|
| GO:19001<br>82 | positive regulation of protein localization to nucleus | 0.0006055<br>8  | 0.0017175<br>26 | 5 |
| GO:00068<br>69 | lipid transport                                        | 0.0006222<br>9  | 0.0017610<br>64 | 5 |
| GO:00070<br>06 | mitochondrial membrane organization                    | 0.0006228<br>78 | 0.0017610<br>64 | 5 |
| GO:00711<br>58 | positive regulation of cell cycle arrest               | 0.0006347<br>09 | 0.0017880<br>93 | 5 |
| GO:00302<br>62 | apoptotic nuclear changes                              | 0.0006354<br>02 | 0.0017880<br>93 | 5 |
| GO:00602<br>51 | regulation of glial cell proliferation                 | 0.0006354<br>02 | 0.0017880<br>93 | 5 |
| GO:19027<br>49 | regulation of cell cycle G2/M phase transition         | 0.0006388<br>43 | 0.0017949<br>85 | 5 |
| GO:00082<br>86 | insulin receptor signaling pathway                     | 0.0006430<br>17 | 0.0017990<br>54 | 5 |
| GO:00455<br>98 | regulation of fat cell differentiation                 | 0.0006430<br>17 | 0.0017990<br>54 | 5 |
| GO:00301<br>98 | extracellular matrix organization                      | 0.0006432<br>74 | 0.0017990<br>54 | 5 |
| GO:00900<br>68 | positive regulation of cell cycle process              | 0.0006452<br>7  | 0.0018018<br>5  | 5 |
| GO:00430<br>62 | extracellular structure organization                   | 0.0006539<br>79 | 0.0018233<br>55 | 5 |
| GO:00705<br>85 | protein localization to mitochondrion                  | 0.0006636<br>41 | 0.0018474<br>47 | 5 |
| GO:00506<br>70 | regulation of lymphocyte proliferation                 | 0.0006702<br>67 | 0.0018630<br>28 | 5 |
| GO:19016<br>53 | cellular response to peptide                           | 0.0006758<br>21 | 0.0018755<br>83 | 4 |
| GO:00076<br>12 | learning                                               | 0.0006847<br>56 | 0.0018945<br>7  | 4 |
| GO:00381<br>27 | ERBB signaling pathway                                 | 0.0006847<br>56 | 0.0018945<br>7  | 4 |
| GO:00018<br>93 | maternal placenta development                          | 0.0006907<br>56 | 0.0018966<br>69 | 4 |
| GO:00105<br>43 | regulation of platelet activation                      | 0.0006907<br>56 | 0.0018966<br>69 | 4 |
| GO:00425<br>54 | superoxide anion generation                            | 0.0006907<br>56 | 0.0018966<br>69 | 4 |
| GO:00708<br>73 | regulation of glycogen metabolic process               | 0.0006907<br>56 | 0.0018966<br>69 | 4 |
| GO:19053<br>32 | positive regulation of morphogenesis of an epithelium  | 0.0006907<br>56 | 0.0018966<br>69 | 4 |

|                |                                                                          |                 |                 |   |
|----------------|--------------------------------------------------------------------------|-----------------|-----------------|---|
| GO:00480<br>41 | focal adhesion assembly                                                  | 0.0006959<br>26 | 0.0019079<br>69 | 4 |
| GO:00329<br>44 | regulation of mononuclear cell proliferation                             | 0.0007028<br>78 | 0.0019241<br>13 | 4 |
| GO:00197<br>22 | calcium-mediated signaling                                               | 0.0007196<br>37 | 0.0019670<br>16 | 4 |
| GO:00462<br>09 | nitric oxide metabolic process                                           | 0.0007280<br>51 | 0.0019852<br>24 | 4 |
| GO:19040<br>64 | positive regulation of cation transmembrane transport                    | 0.0007284<br>93 | 0.0019852<br>24 | 4 |
| GO:00069<br>21 | cellular component disassembly involved in execution phase of apoptosis  | 0.0007490<br>92 | 0.0020225<br>41 | 4 |
| GO:00715<br>42 | dopaminergic neuron differentiation                                      | 0.0007490<br>92 | 0.0020225<br>41 | 4 |
| GO:00860<br>10 | membrane depolarization during action potential                          | 0.0007490<br>92 | 0.0020225<br>41 | 4 |
| GO:00900<br>50 | positive regulation of cell migration involved in sprouting angiogenesis | 0.0007490<br>92 | 0.0020225<br>41 | 4 |
| GO:19049<br>94 | regulation of leukocyte adhesion to vascular endothelial cell            | 0.0007490<br>92 | 0.0020225<br>41 | 4 |
| GO:20002<br>73 | positive regulation of signaling receptor activity                       | 0.0007490<br>92 | 0.0020225<br>41 | 4 |
| GO:00106<br>75 | regulation of cellular carbohydrate metabolic process                    | 0.0007511<br>29 | 0.0020225<br>41 | 4 |
| GO:00719<br>01 | negative regulation of protein serine/threonine kinase activity          | 0.0007511<br>29 | 0.0020225<br>41 | 4 |
| GO:00310<br>56 | regulation of histone modification                                       | 0.0007742<br>87 | 0.0020787<br>11 | 4 |
| GO:00435<br>24 | negative regulation of neuron apoptotic process                          | 0.0007742<br>87 | 0.0020787<br>11 | 4 |
| GO:20010<br>20 | regulation of response to DNA damage stimulus                            | 0.0007897<br>93 | 0.0021172       | 4 |
| GO:00061<br>12 | energy reserve metabolic process                                         | 0.0007954<br>25 | 0.0021228<br>62 | 4 |
| GO:00097<br>91 | post-embryonic development                                               | 0.0007954<br>25 | 0.0021228<br>62 | 4 |
| GO:00341<br>09 | homotypic cell-cell adhesion                                             | 0.0007954<br>25 | 0.0021228<br>62 | 4 |
| GO:00605<br>37 | muscle tissue development                                                | 0.0008067<br>41 | 0.0021409<br>19 | 4 |
| GO:00302<br>24 | monocyte differentiation                                                 | 0.0008104<br>73 | 0.0021409<br>19 | 4 |
| GO:00320<br>94 | response to food                                                         | 0.0008104<br>73 | 0.0021409<br>19 | 4 |

|                |                                                                    |                 |                 |   |
|----------------|--------------------------------------------------------------------|-----------------|-----------------|---|
| GO:00328<br>85 | regulation of polysaccharide biosynthetic process                  | 0.0008104<br>73 | 0.0021409<br>19 | 4 |
| GO:00457<br>77 | positive regulation of blood pressure                              | 0.0008104<br>73 | 0.0021409<br>19 | 4 |
| GO:00603<br>06 | regulation of membrane repolarization                              | 0.0008104<br>73 | 0.0021409<br>19 | 4 |
| GO:19031<br>31 | mononuclear cell differentiation                                   | 0.0008104<br>73 | 0.0021409<br>19 | 4 |
| GO:19047<br>05 | regulation of vascular associated smooth muscle cell proliferation | 0.0008307<br>12 | 0.0021848<br>12 | 4 |
| GO:19908<br>74 | vascular associated smooth muscle cell proliferation               | 0.0008307<br>12 | 0.0021848<br>12 | 4 |
| GO:20010<br>57 | reactive nitrogen species metabolic process                        | 0.0008307<br>12 | 0.0021848<br>12 | 4 |
| GO:00468<br>89 | positive regulation of lipid biosynthetic process                  | 0.0008670<br>89 | 0.0022771<br>77 | 4 |
| GO:00082<br>03 | cholesterol metabolic process                                      | 0.0008722<br>89 | 0.0022875<br>14 | 4 |
| GO:00342<br>05 | amyloid-beta formation                                             | 0.0008749<br>61 | 0.0022878<br>89 | 4 |
| GO:00860<br>91 | regulation of heart rate by cardiac conduction                     | 0.0008749<br>61 | 0.0022878<br>89 | 4 |
| GO:00016<br>49 | osteoblast differentiation                                         | 0.0008847<br>99 | 0.0023069<br>47 | 4 |
| GO:00487<br>38 | cardiac muscle tissue development                                  | 0.0008847<br>99 | 0.0023069<br>47 | 4 |
| GO:00305<br>95 | leukocyte chemotaxis                                               | 0.0009048<br>15 | 0.0023557<br>39 | 4 |
| GO:00423<br>07 | positive regulation of protein import into nucleus                 | 0.0009426<br>18 | 0.0024381<br>13 | 4 |
| GO:00424<br>17 | dopamine metabolic process                                         | 0.0009426<br>18 | 0.0024381<br>13 | 4 |
| GO:19029<br>91 | regulation of amyloid precursor protein catabolic process          | 0.0009426<br>18 | 0.0024381<br>13 | 4 |
| GO:00420<br>58 | regulation of epidermal growth factor receptor signaling pathway   | 0.0009431<br>91 | 0.0024381<br>13 | 4 |
| GO:00705<br>42 | response to fatty acid                                             | 0.0009431<br>91 | 0.0024381<br>13 | 4 |
| GO:00070<br>50 | cell cycle arrest                                                  | 0.0009458<br>93 | 0.0024416<br>1  | 4 |
| GO:00309<br>02 | hindbrain development                                              | 0.0009516<br>48 | 0.0024529<br>65 | 4 |
| GO:19030<br>39 | positive regulation of leukocyte cell-cell adhesion                | 0.0009669<br>63 | 0.0024853<br>62 | 4 |

|                |                                                                                         |                 |                 |   |
|----------------|-----------------------------------------------------------------------------------------|-----------------|-----------------|---|
| GO:19040<br>18 | positive regulation of vasculature development                                          | 0.0009669<br>63 | 0.0024853<br>62 | 4 |
| GO:00332<br>73 | response to vitamin                                                                     | 0.0009829<br>52 | 0.0025157<br>37 | 4 |
| GO:00341<br>03 | regulation of tissue remodeling                                                         | 0.0009829<br>52 | 0.0025157<br>37 | 4 |
| GO:20001<br>77 | regulation of neural precursor cell proliferation                                       | 0.0009829<br>52 | 0.0025157<br>37 | 4 |
| GO:00604<br>02 | calcium ion transport into cytosol                                                      | 0.0010074<br>59 | 0.0025577<br>48 | 4 |
| GO:00320<br>70 | regulation of deoxyribonuclease activity                                                | 0.0010097<br>83 | 0.0025577<br>48 | 4 |
| GO:00519<br>01 | positive regulation of mitochondrial depolarization                                     | 0.0010097<br>83 | 0.0025577<br>48 | 4 |
| GO:00600<br>68 | vagina development                                                                      | 0.0010097<br>83 | 0.0025577<br>48 | 4 |
| GO:00703<br>91 | response to lipoteichoic acid                                                           | 0.0010097<br>83 | 0.0025577<br>48 | 4 |
| GO:00712<br>23 | cellular response to lipoteichoic acid                                                  | 0.0010097<br>83 | 0.0025577<br>48 | 4 |
| GO:00900<br>37 | positive regulation of protein kinase C signaling                                       | 0.0010097<br>83 | 0.0025577<br>48 | 4 |
| GO:00996<br>22 | cardiac muscle cell membrane repolarization                                             | 0.0010135<br>02 | 0.0025577<br>48 | 4 |
| GO:19001<br>17 | regulation of execution phase of apoptosis                                              | 0.0010135<br>02 | 0.0025577<br>48 | 4 |
| GO:19020<br>42 | negative regulation of extrinsic apoptotic signaling pathway via death domain receptors | 0.0010135<br>02 | 0.0025577<br>48 | 4 |
| GO:19004<br>07 | regulation of cellular response to oxidative stress                                     | 0.0010238<br>78 | 0.0025803<br>36 | 4 |
| GO:19021<br>07 | positive regulation of leukocyte differentiation                                        | 0.0010362<br>6  | 0.0026079<br>06 | 4 |
| GO:19030<br>37 | regulation of leukocyte cell-cell adhesion                                              | 0.0010644<br>54 | 0.0026751<br>41 | 4 |
| GO:19030<br>35 | negative regulation of response to wounding                                             | 0.0010659<br>88 | 0.0026752<br>81 | 4 |
| GO:00706<br>63 | regulation of leukocyte proliferation                                                   | 0.0010777<br>97 | 0.0027011<br>7  | 4 |
| GO:00015<br>04 | neurotransmitter uptake                                                                 | 0.0010876<br>73 | 0.0027146<br>43 | 4 |
| GO:19040<br>37 | positive regulation of epithelial cell apoptotic process                                | 0.0010876<br>73 | 0.0027146<br>43 | 4 |
| GO:19045<br>91 | positive regulation of protein import                                                   | 0.0010876<br>73 | 0.0027146<br>43 | 4 |

|            |                                                                                                     |             |             |   |
|------------|-----------------------------------------------------------------------------------------------------|-------------|-------------|---|
| GO:0006814 | sodium ion transport                                                                                | 0.001101089 | 0.002743937 | 4 |
| GO:0032147 | activation of protein kinase activity                                                               | 0.001102443 | 0.002743937 | 4 |
| GO:0008202 | steroid metabolic process                                                                           | 0.001121834 | 0.002788364 | 4 |
| GO:1902652 | secondary alcohol metabolic process                                                                 | 0.001126338 | 0.00279572  | 4 |
| GO:0006308 | DNA catabolic process                                                                               | 0.001165189 | 0.002884239 | 4 |
| GO:0045823 | positive regulation of heart contraction                                                            | 0.001165189 | 0.002884239 | 4 |
| GO:0034329 | cell junction assembly                                                                              | 0.001180932 | 0.002919215 | 4 |
| GO:0001820 | serotonin secretion                                                                                 | 0.001230309 | 0.003000285 | 4 |
| GO:0009629 | response to gravity                                                                                 | 0.001230309 | 0.003000285 | 4 |
| GO:0019371 | cyclooxygenase pathway                                                                              | 0.001230309 | 0.003000285 | 4 |
| GO:0033327 | Leydig cell differentiation                                                                         | 0.001230309 | 0.003000285 | 4 |
| GO:0033483 | gas homeostasis                                                                                     | 0.001230309 | 0.003000285 | 4 |
| GO:0040015 | negative regulation of multicellular organism growth                                                | 0.001230309 | 0.003000285 | 4 |
| GO:0045899 | positive regulation of RNA polymerase II transcription preinitiation complex assembly               | 0.001230309 | 0.003000285 | 4 |
| GO:0060525 | prostate glandular acinus development                                                               | 0.001230309 | 0.003000285 | 4 |
| GO:1903800 | positive regulation of production of miRNAs involved in gene silencing by miRNA                     | 0.001230309 | 0.003000285 | 4 |
| GO:2001269 | positive regulation of cysteine-type endopeptidase activity involved in apoptotic signaling pathway | 0.001230309 | 0.003000285 | 4 |
| GO:0032881 | regulation of polysaccharide metabolic process                                                      | 0.001246106 | 0.00301168  | 4 |
| GO:0033173 | calcineurin-NFAT signaling cascade                                                                  | 0.001246106 | 0.00301168  | 4 |
| GO:0030516 | regulation of axon extension                                                                        | 0.001246632 | 0.00301168  | 4 |
| GO:0071674 | mononuclear cell migration                                                                          | 0.001246632 | 0.00301168  | 4 |
| GO:0120162 | positive regulation of cold-induced thermogenesis                                                   | 0.001246632 | 0.00301168  | 4 |

|                |                                                                                       |                 |                 |   |
|----------------|---------------------------------------------------------------------------------------|-----------------|-----------------|---|
| GO:19011<br>84 | regulation of ERBB signaling pathway                                                  | 0.0012466<br>32 | 0.0030116<br>8  | 4 |
| GO:19016<br>55 | cellular response to ketone                                                           | 0.0012466<br>32 | 0.0030116<br>8  | 4 |
| GO:00070<br>93 | mitotic cell cycle checkpoint                                                         | 0.0012553<br>21 | 0.0030286<br>27 | 4 |
| GO:00458<br>33 | negative regulation of lipid metabolic process                                        | 0.0012949<br>37 | 0.0031158<br>97 | 4 |
| GO:00480<br>10 | vascular endothelial growth factor receptor signaling pathway                         | 0.0012949<br>37 | 0.0031158<br>97 | 4 |
| GO:00459<br>31 | positive regulation of mitotic cell cycle                                             | 0.0013237<br>62 | 0.0031760<br>79 | 4 |
| GO:00310<br>18 | endocrine pancreas development                                                        | 0.0013304<br>8  | 0.0031760<br>79 | 4 |
| GO:00327<br>22 | positive regulation of chemokine production                                           | 0.0013304<br>8  | 0.0031760<br>79 | 4 |
| GO:00427<br>71 | intrinsic apoptotic signaling pathway in response to DNA damage by p53 class mediator | 0.0013304<br>8  | 0.0031760<br>79 | 4 |
| GO:00454<br>29 | positive regulation of nitric oxide biosynthetic process                              | 0.0013304<br>8  | 0.0031760<br>79 | 4 |
| GO:19046<br>46 | cellular response to amyloid-beta                                                     | 0.0013304<br>8  | 0.0031760<br>79 | 4 |
| GO:00161<br>25 | sterol metabolic process                                                              | 0.0013589<br>99 | 0.0032398<br>85 | 4 |
| GO:00019<br>33 | negative regulation of protein phosphorylation                                        | 0.0013647<br>91 | 0.0032494<br>12 | 4 |
| GO:00431<br>22 | regulation of I-kappaB kinase/NF-kappaB signaling                                     | 0.0013836<br>49 | 0.0032899<br>82 | 4 |
| GO:00519<br>24 | regulation of calcium ion transport                                                   | 0.0014118<br>44 | 0.0033505<br>14 | 4 |
| GO:00059<br>78 | glycogen biosynthetic process                                                         | 0.0014183<br>65 | 0.0033505<br>14 | 4 |
| GO:00092<br>50 | glucan biosynthetic process                                                           | 0.0014183<br>65 | 0.0033505<br>14 | 4 |
| GO:00610<br>28 | establishment of endothelial barrier                                                  | 0.0014183<br>65 | 0.0033505<br>14 | 4 |
| GO:19044<br>07 | positive regulation of nitric oxide metabolic process                                 | 0.0014183<br>65 | 0.0033505<br>14 | 4 |
| GO:00018<br>19 | positive regulation of cytokine production                                            | 0.0014241<br>84 | 0.0033555       | 4 |
| GO:00434<br>34 | response to peptide hormone                                                           | 0.0014241<br>84 | 0.0033555       | 4 |
| GO:00308<br>56 | regulation of epithelial cell differentiation                                         | 0.0014315<br>45 | 0.0033640<br>81 | 4 |

|                |                                                                        |                 |                 |   |
|----------------|------------------------------------------------------------------------|-----------------|-----------------|---|
| GO:19059<br>52 | regulation of lipid localization                                       | 0.0014315<br>45 | 0.0033640<br>81 | 4 |
| GO:00326<br>37 | interleukin-8 production                                               | 0.0014476<br>92 | 0.0033709<br>85 | 4 |
| GO:00442<br>64 | cellular polysaccharide metabolic process                              | 0.0014476<br>92 | 0.0033709<br>85 | 4 |
| GO:19028<br>82 | regulation of response to oxidative stress                             | 0.0014476<br>92 | 0.0033709<br>85 | 4 |
| GO:00020<br>24 | diet induced thermogenesis                                             | 0.0014717<br>42 | 0.0033709<br>85 | 4 |
| GO:00069<br>83 | ER overload response                                                   | 0.0014717<br>42 | 0.0033709<br>85 | 4 |
| GO:00070<br>77 | mitotic nuclear envelope disassembly                                   | 0.0014717<br>42 | 0.0033709<br>85 | 4 |
| GO:00324<br>94 | response to peptidoglycan                                              | 0.0014717<br>42 | 0.0033709<br>85 | 4 |
| GO:00457<br>60 | positive regulation of action potential                                | 0.0014717<br>42 | 0.0033709<br>85 | 4 |
| GO:00465<br>41 | saliva secretion                                                       | 0.0014717<br>42 | 0.0033709<br>85 | 4 |
| GO:00515<br>83 | dopamine uptake involved in synaptic transmission                      | 0.0014717<br>42 | 0.0033709<br>85 | 4 |
| GO:00519<br>34 | catecholamine uptake involved in synaptic transmission                 | 0.0014717<br>42 | 0.0033709<br>85 | 4 |
| GO:00604<br>42 | branching involved in prostate gland morphogenesis                     | 0.0014717<br>42 | 0.0033709<br>85 | 4 |
| GO:00607<br>36 | prostate gland growth                                                  | 0.0014717<br>42 | 0.0033709<br>85 | 4 |
| GO:00607<br>42 | epithelial cell differentiation involved in prostate gland development | 0.0014717<br>42 | 0.0033709<br>85 | 4 |
| GO:00702<br>43 | regulation of thymocyte apoptotic process                              | 0.0014717<br>42 | 0.0033709<br>85 | 4 |
| GO:00901<br>54 | positive regulation of sphingolipid biosynthetic process               | 0.0014717<br>42 | 0.0033709<br>85 | 4 |
| GO:00903<br>31 | negative regulation of platelet aggregation                            | 0.0014717<br>42 | 0.0033709<br>85 | 4 |
| GO:19025<br>10 | regulation of apoptotic DNA fragmentation                              | 0.0014717<br>42 | 0.0033709<br>85 | 4 |
| GO:19041<br>81 | positive regulation of membrane depolarization                         | 0.0014717<br>42 | 0.0033709<br>85 | 4 |
| GO:20003<br>04 | positive regulation of ceramide biosynthetic process                   | 0.0014717<br>42 | 0.0033709<br>85 | 4 |
| GO:00080<br>16 | regulation of heart contraction                                        | 0.0014990<br>71 | 0.0034278<br>18 | 4 |



|            |                                                    |             |             |   |
|------------|----------------------------------------------------|-------------|-------------|---|
| GO:0022600 | digestive system process                           | 0.001501285 | 0.003427818 | 4 |
| GO:0021543 | pallium development                                | 0.001506909 | 0.003427818 | 4 |
| GO:0022602 | ovulation cycle process                            | 0.001509815 | 0.003427818 | 4 |
| GO:0045933 | positive regulation of muscle contraction          | 0.001509815 | 0.003427818 | 4 |
| GO:0048599 | oocyte development                                 | 0.001509815 | 0.003427818 | 4 |
| GO:0048806 | genitalia development                              | 0.001509815 | 0.003427818 | 4 |
| GO:0030072 | peptide hormone secretion                          | 0.001529042 | 0.003467119 | 4 |
| GO:0003205 | cardiac chamber development                        | 0.001545669 | 0.00349606  | 4 |
| GO:0015718 | monocarboxylic acid transport                      | 0.001545669 | 0.00349606  | 4 |
| GO:0002042 | cell migration involved in sprouting angiogenesis  | 0.001556246 | 0.00350247  | 4 |
| GO:0034766 | negative regulation of ion transmembrane transport | 0.001556246 | 0.00350247  | 4 |
| GO:0060079 | excitatory postsynaptic potential                  | 0.001556246 | 0.00350247  | 4 |
| GO:0098869 | cellular oxidant detoxification                    | 0.001556246 | 0.00350247  | 4 |
| GO:0003007 | heart morphogenesis                                | 0.001559468 | 0.003505361 | 4 |
| GO:0021537 | telencephalon development                          | 0.001590353 | 0.003570349 | 4 |
| GO:0042220 | response to cocaine                                | 0.001604883 | 0.003598506 | 4 |
| GO:0006874 | cellular calcium ion homeostasis                   | 0.001614817 | 0.003616298 | 4 |
| GO:0002067 | glandular epithelial cell differentiation          | 0.001703621 | 0.003787049 | 4 |
| GO:0002686 | negative regulation of leukocyte migration         | 0.001703621 | 0.003787049 | 4 |
| GO:0030850 | prostate gland development                         | 0.001703621 | 0.003787049 | 4 |
| GO:0048512 | circadian behavior                                 | 0.001703621 | 0.003787049 | 4 |
| GO:0086009 | membrane repolarization                            | 0.001703621 | 0.003787049 | 4 |

|                |                                                                             |                 |                 |   |
|----------------|-----------------------------------------------------------------------------|-----------------|-----------------|---|
| GO:00977<br>20 | calcineurin-mediated signaling                                              | 0.0017036<br>21 | 0.0037870<br>49 | 4 |
| GO:00069<br>41 | striated muscle contraction                                                 | 0.0017080<br>87 | 0.0037876<br>69 | 4 |
| GO:00604<br>01 | cytosolic calcium ion transport                                             | 0.0017080<br>87 | 0.0037876<br>69 | 4 |
| GO:00324<br>14 | positive regulation of ion transmembrane transporter activity               | 0.0017295<br>2  | 0.0038305<br>03 | 4 |
| GO:00423<br>08 | negative regulation of protein import into nucleus                          | 0.0017338<br>8  | 0.0038307<br>82 | 4 |
| GO:19045<br>90 | negative regulation of protein import                                       | 0.0017338<br>8  | 0.0038307<br>82 | 4 |
| GO:00315<br>89 | cell-substrate adhesion                                                     | 0.0017551<br>47 | 0.0038730<br>39 | 4 |
| GO:00313<br>30 | negative regulation of cellular catabolic process                           | 0.0017855<br>71 | 0.0039326<br>74 | 4 |
| GO:00303<br>30 | DNA damage response, signal transduction by p53 class mediator              | 0.0017901<br>36 | 0.0039326<br>74 | 4 |
| GO:00550<br>17 | cardiac muscle tissue growth                                                | 0.0017901<br>36 | 0.0039326<br>74 | 4 |
| GO:19017<br>96 | regulation of signal transduction by p53 class mediator                     | 0.0017938<br>39 | 0.0039326<br>74 | 4 |
| GO:00017<br>74 | microglial cell activation                                                  | 0.0018060<br>79 | 0.0039326<br>74 | 4 |
| GO:00022<br>69 | leukocyte activation involved in inflammatory response                      | 0.0018060<br>79 | 0.0039326<br>74 | 4 |
| GO:00076<br>22 | rhythmic behavior                                                           | 0.0018060<br>79 | 0.0039326<br>74 | 4 |
| GO:00140<br>09 | glial cell proliferation                                                    | 0.0018060<br>79 | 0.0039326<br>74 | 4 |
| GO:00301<br>95 | negative regulation of blood coagulation                                    | 0.0018060<br>79 | 0.0039326<br>74 | 4 |
| GO:00429<br>87 | amyloid precursor protein catabolic process                                 | 0.0018060<br>79 | 0.0039326<br>74 | 4 |
| GO:19047<br>07 | positive regulation of vascular associated smooth muscle cell proliferation | 0.0018060<br>79 | 0.0039326<br>74 | 4 |
| GO:00083<br>61 | regulation of cell size                                                     | 0.0018378<br>8  | 0.0039971<br>11 | 4 |
| GO:00468<br>83 | regulation of hormone secretion                                             | 0.0018545<br>28 | 0.0040284<br>75 | 4 |
| GO:00713<br>46 | cellular response to interferon-gamma                                       | 0.0018827<br>1  | 0.0040847<br>89 | 4 |
| GO:00071<br>59 | leukocyte cell-cell adhesion                                                | 0.0018980<br>71 | 0.0041074<br>14 | 4 |

|                |                                                                                         |                 |                 |   |
|----------------|-----------------------------------------------------------------------------------------|-----------------|-----------------|---|
| GO:00165<br>70 | histone modification                                                                    | 0.0018999<br>48 | 0.0041074<br>14 | 4 |
| GO:00550<br>74 | calcium ion homeostasis                                                                 | 0.0018999<br>48 | 0.0041074<br>14 | 4 |
| GO:00504<br>35 | amyloid-beta metabolic process                                                          | 0.0019123<br>07 | 0.0041219<br>08 | 4 |
| GO:19000<br>47 | negative regulation of hemostasis                                                       | 0.0019123<br>07 | 0.0041219<br>08 | 4 |
| GO:00189<br>58 | phenol-containing compound metabolic process                                            | 0.0019157<br>64 | 0.0041219<br>08 | 4 |
| GO:00217<br>61 | limbic system development                                                               | 0.0019157<br>64 | 0.0041219<br>08 | 4 |
| GO:00905<br>96 | sensory organ morphogenesis                                                             | 0.0019254<br>89 | 0.0041342<br>09 | 4 |
| GO:00510<br>52 | regulation of DNA metabolic process                                                     | 0.0019277<br>11 | 0.0041342<br>09 | 4 |
| GO:00713<br>47 | cellular response to interleukin-1                                                      | 0.0019283<br>36 | 0.0041342<br>09 | 4 |
| GO:00458<br>98 | regulation of RNA polymerase II transcription preinitiation complex assembly            | 0.0020165<br>22 | 0.0042900<br>3  | 4 |
| GO:00509<br>30 | induction of positive chemotaxis                                                        | 0.0020165<br>22 | 0.0042900<br>3  | 4 |
| GO:00860<br>69 | bundle of His cell to Purkinje myocyte communication                                    | 0.0020165<br>22 | 0.0042900<br>3  | 4 |
| GO:01060<br>70 | regulation of adenylate cyclase-activating G protein-coupled receptor signaling pathway | 0.0020165<br>22 | 0.0042900<br>3  | 4 |
| GO:19036<br>24 | regulation of DNA catabolic process                                                     | 0.0020165<br>22 | 0.0042900<br>3  | 4 |
| GO:20012<br>57 | regulation of cation channel activity                                                   | 0.0020220<br>1  | 0.0042900<br>3  | 4 |
| GO:00099<br>94 | oocyte differentiation                                                                  | 0.0020223<br>53 | 0.0042900<br>3  | 4 |
| GO:00311<br>03 | axon regeneration                                                                       | 0.0020223<br>53 | 0.0042900<br>3  | 4 |
| GO:00509<br>99 | regulation of nitric-oxide synthase activity                                            | 0.0020223<br>53 | 0.0042900<br>3  | 4 |
| GO:00344<br>40 | lipid oxidation                                                                         | 0.0020473<br>74 | 0.0043228<br>35 | 4 |
| GO:00423<br>03 | molting cycle                                                                           | 0.0020473<br>74 | 0.0043228<br>35 | 4 |
| GO:00426<br>33 | hair cycle                                                                              | 0.0020473<br>74 | 0.0043228<br>35 | 4 |
| GO:00613<br>87 | regulation of extent of cell growth                                                     | 0.0020473<br>74 | 0.0043228<br>35 | 4 |

|                |                                                                     |                 |                 |   |
|----------------|---------------------------------------------------------------------|-----------------|-----------------|---|
| GO:00448<br>39 | cell cycle G2/M phase transition                                    | 0.0020735<br>73 | 0.0043730<br>48 | 4 |
| GO:00059<br>76 | polysaccharide metabolic process                                    | 0.0021154<br>68 | 0.0044510<br>27 | 4 |
| GO:00995<br>65 | chemical synaptic transmission, postsynaptic                        | 0.0021154<br>68 | 0.0044510<br>27 | 4 |
| GO:00453<br>33 | cellular respiration                                                | 0.0021189<br>72 | 0.0044532<br>21 | 4 |
| GO:00327<br>31 | positive regulation of interleukin-1 beta production                | 0.0021362<br>66 | 0.0044739<br>79 | 4 |
| GO:00457<br>44 | negative regulation of G protein-coupled receptor signaling pathway | 0.0021362<br>66 | 0.0044739<br>79 | 4 |
| GO:00617<br>56 | leukocyte adhesion to vascular endothelial cell                     | 0.0021362<br>66 | 0.0044739<br>79 | 4 |
| GO:00431<br>23 | positive regulation of I-kappaB kinase/NF-kappaB signaling          | 0.0021687<br>06 | 0.0045366<br>67 | 4 |
| GO:00329<br>63 | collagen metabolic process                                          | 0.0021851<br>11 | 0.0045657<br>05 | 4 |
| GO:00224<br>12 | cellular process involved in reproduction in multicellular organism | 0.0022443<br>2  | 0.0046713<br>43 | 4 |
| GO:00165<br>69 | covalent chromatin modification                                     | 0.0022523<br>58 | 0.0046713<br>43 | 4 |
| GO:00065<br>84 | catecholamine metabolic process                                     | 0.0022540<br>93 | 0.0046713<br>43 | 4 |
| GO:00097<br>12 | catechol-containing compound metabolic process                      | 0.0022540<br>93 | 0.0046713<br>43 | 4 |
| GO:00327<br>57 | positive regulation of interleukin-8 production                     | 0.0022540<br>93 | 0.0046713<br>43 | 4 |
| GO:00220<br>37 | metencephalon development                                           | 0.0022563<br>21 | 0.0046713<br>43 | 4 |
| GO:00432<br>00 | response to amino acid                                              | 0.0022563<br>21 | 0.0046713<br>43 | 4 |
| GO:19907<br>48 | cellular detoxification                                             | 0.0022563<br>21 | 0.0046713<br>43 | 4 |
| GO:00451<br>65 | cell fate commitment                                                | 0.0022706<br>21 | 0.0046904<br>32 | 4 |
| GO:00303<br>08 | negative regulation of cell growth                                  | 0.0022707<br>26 | 0.0046904<br>32 | 4 |
| GO:00224<br>09 | positive regulation of cell-cell adhesion                           | 0.0023116<br>71 | 0.0047317<br>01 | 4 |
| GO:00060<br>89 | lactate metabolic process                                           | 0.0023194<br>7  | 0.0047317<br>01 | 4 |
| GO:00341<br>11 | negative regulation of homotypic cell-cell adhesion                 | 0.0023194<br>7  | 0.0047317<br>01 | 4 |

|                |                                                                |                 |                 |   |
|----------------|----------------------------------------------------------------|-----------------|-----------------|---|
| GO:00448<br>49 | estrous cycle                                                  | 0.0023194<br>7  | 0.0047317<br>01 | 4 |
| GO:00456<br>51 | positive regulation of macrophage differentiation              | 0.0023194<br>7  | 0.0047317<br>01 | 4 |
| GO:00480<br>70 | regulation of developmental pigmentation                       | 0.0023194<br>7  | 0.0047317<br>01 | 4 |
| GO:00485<br>69 | post-embryonic animal organ development                        | 0.0023194<br>7  | 0.0047317<br>01 | 4 |
| GO:00510<br>44 | positive regulation of membrane protein ectodomain proteolysis | 0.0023194<br>7  | 0.0047317<br>01 | 4 |
| GO:19015<br>50 | regulation of endothelial cell development                     | 0.0023194<br>7  | 0.0047317<br>01 | 4 |
| GO:19031<br>40 | regulation of establishment of endothelial barrier             | 0.0023194<br>7  | 0.0047317<br>01 | 4 |
| GO:20010<br>28 | positive regulation of endothelial cell chemotaxis             | 0.0023194<br>7  | 0.0047317<br>01 | 4 |
| GO:00224<br>08 | negative regulation of cell-cell adhesion                      | 0.0023230<br>28 | 0.0047336<br>23 | 4 |
| GO:00604<br>19 | heart growth                                                   | 0.0023291<br>17 | 0.0047406<br>93 | 4 |
| GO:00423<br>26 | negative regulation of phosphorylation                         | 0.0023405<br>63 | 0.0047586<br>38 | 4 |
| GO:00019<br>54 | positive regulation of cell-matrix adhesion                    | 0.0023758<br>79 | 0.0048088<br>26 | 4 |
| GO:00029<br>31 | response to ischemia                                           | 0.0023758<br>79 | 0.0048088<br>26 | 4 |
| GO:00508<br>19 | negative regulation of coagulation                             | 0.0023758<br>79 | 0.0048088<br>26 | 4 |
| GO:00513<br>53 | positive regulation of oxidoreductase activity                 | 0.0023758<br>79 | 0.0048088<br>26 | 4 |
| GO:00466<br>20 | regulation of organ growth                                     | 0.0024035<br>16 | 0.0048539<br>05 | 4 |
| GO:00609<br>64 | regulation of gene silencing by miRNA                          | 0.0024035<br>16 | 0.0048539<br>05 | 4 |
| GO:00454<br>46 | endothelial cell differentiation                               | 0.0024795<br>36 | 0.0050002<br>29 | 4 |
| GO:00328<br>68 | response to insulin                                            | 0.0024814<br>98 | 0.0050002<br>29 | 4 |
| GO:00702<br>28 | regulation of lymphocyte apoptotic process                     | 0.0025016<br>69 | 0.0050296<br>72 | 4 |
| GO:00860<br>02 | cardiac muscle cell action potential involved in contraction   | 0.0025016<br>69 | 0.0050296<br>72 | 4 |
| GO:00420<br>98 | T cell proliferation                                           | 0.0025410<br>48 | 0.0050918<br>7  | 4 |

|                |                                                                   |                 |                 |   |
|----------------|-------------------------------------------------------------------|-----------------|-----------------|---|
| GO:00508<br>64 | regulation of B cell activation                                   | 0.0025410<br>48 | 0.0050918<br>7  | 4 |
| GO:19022<br>75 | regulation of chromatin organization                              | 0.0025410<br>48 | 0.0050918<br>7  | 4 |
| GO:00068<br>05 | xenobiotic metabolic process                                      | 0.0025571<br>94 | 0.0051129<br>01 | 4 |
| GO:00219<br>87 | cerebral cortex development                                       | 0.0025571<br>94 | 0.0051129<br>01 | 4 |
| GO:00725<br>03 | cellular divalent inorganic cation homeostasis                    | 0.0025891<br>21 | 0.0051710<br>23 | 4 |
| GO:00060<br>66 | alcohol metabolic process                                         | 0.0025997<br>78 | 0.0051860<br>91 | 4 |
| GO:00072<br>49 | I-kappaB kinase/NF-kappaB signaling                               | 0.0026149<br>13 | 0.0051860<br>91 | 4 |
| GO:00305<br>20 | intracellular estrogen receptor signaling pathway                 | 0.0026315<br>08 | 0.0051860<br>91 | 4 |
| GO:00427<br>43 | hydrogen peroxide metabolic process                               | 0.0026315<br>08 | 0.0051860<br>91 | 4 |
| GO:00480<br>16 | inositol phosphate-mediated signaling                             | 0.0026315<br>08 | 0.0051860<br>91 | 4 |
| GO:00989<br>00 | regulation of action potential                                    | 0.0026315<br>08 | 0.0051860<br>91 | 4 |
| GO:00303<br>97 | membrane disassembly                                              | 0.0026425<br>23 | 0.0051860<br>91 | 4 |
| GO:00322<br>25 | regulation of synaptic transmission, dopaminergic                 | 0.0026425<br>23 | 0.0051860<br>91 | 4 |
| GO:00431<br>16 | negative regulation of vascular permeability                      | 0.0026425<br>23 | 0.0051860<br>91 | 4 |
| GO:00457<br>25 | positive regulation of glycogen biosynthetic process              | 0.0026425<br>23 | 0.0051860<br>91 | 3 |
| GO:00510<br>81 | nuclear envelope disassembly                                      | 0.0026425<br>23 | 0.0051860<br>91 | 3 |
| GO:00517<br>70 | positive regulation of nitric-oxide synthase biosynthetic process | 0.0026425<br>23 | 0.0051860<br>91 | 3 |
| GO:00605<br>76 | intestinal epithelial cell development                            | 0.0026425<br>23 | 0.0051860<br>91 | 3 |
| GO:00713<br>91 | cellular response to estrogen stimulus                            | 0.0026425<br>23 | 0.0051860<br>91 | 3 |
| GO:19004<br>51 | positive regulation of glutamate receptor signaling pathway       | 0.0026425<br>23 | 0.0051860<br>91 | 3 |
| GO:19037<br>29 | regulation of plasma membrane organization                        | 0.0026425<br>23 | 0.0051860<br>91 | 3 |
| GO:00600<br>47 | heart contraction                                                 | 0.0026605<br>63 | 0.0052158<br>37 | 3 |

|                |                                                                                                                 |                 |                 |   |
|----------------|-----------------------------------------------------------------------------------------------------------------|-----------------|-----------------|---|
| GO:00431<br>12 | receptor metabolic process                                                                                      | 0.0027140<br>55 | 0.0053101<br>92 | 3 |
| GO:00601<br>47 | regulation of posttranscriptional gene silencing                                                                | 0.0027174<br>96 | 0.0053101<br>92 | 3 |
| GO:00609<br>66 | regulation of gene silencing by RNA                                                                             | 0.0027174<br>96 | 0.0053101<br>92 | 3 |
| GO:19037<br>49 | positive regulation of establishment of protein localization to mitochondrion                                   | 0.0027654<br>39 | 0.0053980<br>47 | 3 |
| GO:19037<br>06 | regulation of hemopoiesis                                                                                       | 0.0027887<br>84 | 0.0054377<br>5  | 3 |
| GO:00302<br>18 | erythrocyte differentiation                                                                                     | 0.0028001<br>75 | 0.0054540<br>83 | 3 |
| GO:00309<br>00 | forebrain development                                                                                           | 0.0028329<br>77 | 0.0055120<br>4  | 3 |
| GO:00108<br>11 | positive regulation of cell-substrate adhesion                                                                  | 0.0028845<br>63 | 0.0056003<br>65 | 3 |
| GO:00972<br>37 | cellular response to toxic substance                                                                            | 0.0028845<br>63 | 0.0056003<br>65 | 3 |
| GO:00066<br>36 | unsaturated fatty acid biosynthetic process                                                                     | 0.0029035<br>04 | 0.0056190<br>53 | 3 |
| GO:00311<br>02 | neuron projection regeneration                                                                                  | 0.0029035<br>04 | 0.0056190<br>53 | 3 |
| GO:00480<br>08 | platelet-derived growth factor receptor signaling pathway                                                       | 0.0029035<br>04 | 0.0056190<br>53 | 3 |
| GO:00343<br>41 | response to interferon-gamma                                                                                    | 0.0029578<br>28 | 0.0056685<br>84 | 3 |
| GO:00071<br>73 | epidermal growth factor receptor signaling pathway                                                              | 0.0029706<br>76 | 0.0056685<br>84 | 3 |
| GO:00486<br>75 | axon extension                                                                                                  | 0.0029706<br>76 | 0.0056685<br>84 | 3 |
| GO:00714<br>66 | cellular response to xenobiotic stimulus                                                                        | 0.0029706<br>76 | 0.0056685<br>84 | 3 |
| GO:00069<br>78 | DNA damage response, signal transduction by p53 class mediator resulting in transcription of p21 class mediator | 0.0029854<br>87 | 0.0056685<br>84 | 3 |
| GO:00305<br>40 | female genitalia development                                                                                    | 0.0029854<br>87 | 0.0056685<br>84 | 3 |
| GO:00310<br>65 | positive regulation of histone deacetylation                                                                    | 0.0029854<br>87 | 0.0056685<br>84 | 3 |
| GO:00335<br>99 | regulation of mammary gland epithelial cell proliferation                                                       | 0.0029854<br>87 | 0.0056685<br>84 | 3 |
| GO:00431<br>17 | positive regulation of vascular permeability                                                                    | 0.0029854<br>87 | 0.0056685<br>84 | 3 |
| GO:00459<br>86 | negative regulation of smooth muscle contraction                                                                | 0.0029854<br>87 | 0.0056685<br>84 | 3 |

|                |                                                                     |                 |                 |   |
|----------------|---------------------------------------------------------------------|-----------------|-----------------|---|
| GO:00506<br>65 | hydrogen peroxide biosynthetic process                              | 0.0029854<br>87 | 0.0056685<br>84 | 3 |
| GO:00550<br>12 | ventricular cardiac muscle cell differentiation                     | 0.0029854<br>87 | 0.0056685<br>84 | 3 |
| GO:00606<br>44 | mammary gland epithelial cell differentiation                       | 0.0029854<br>87 | 0.0056685<br>84 | 3 |
| GO:00708<br>75 | positive regulation of glycogen metabolic process                   | 0.0029854<br>87 | 0.0056685<br>84 | 3 |
| GO:00718<br>50 | mitotic cell cycle arrest                                           | 0.0029854<br>87 | 0.0056685<br>84 | 3 |
| GO:00903<br>36 | positive regulation of brown fat cell differentiation               | 0.0029854<br>87 | 0.0056685<br>84 | 3 |
| GO:00904<br>94 | dopamine uptake                                                     | 0.0029854<br>87 | 0.0056685<br>84 | 3 |
| GO:20008<br>11 | negative regulation of anoikis                                      | 0.0029854<br>87 | 0.0056685<br>84 | 3 |
| GO:00442<br>62 | cellular carbohydrate metabolic process                             | 0.0029970<br>93 | 0.0056846<br>55 | 3 |
| GO:00327<br>32 | positive regulation of interleukin-1 production                     | 0.0030457<br>45 | 0.0057504<br>18 | 3 |
| GO:00619<br>00 | glial cell activation                                               | 0.0030457<br>45 | 0.0057504<br>18 | 3 |
| GO:00977<br>55 | positive regulation of blood vessel diameter                        | 0.0030457<br>45 | 0.0057504<br>18 | 3 |
| GO:19034<br>28 | positive regulation of reactive oxygen species biosynthetic process | 0.0030457<br>45 | 0.0057504<br>18 | 3 |
| GO:00507<br>68 | negative regulation of neurogenesis                                 | 0.0030476<br>54 | 0.0057504<br>18 | 3 |
| GO:00421<br>76 | regulation of protein catabolic process                             | 0.0030819<br>46 | 0.0058090<br>63 | 3 |
| GO:00309<br>68 | endoplasmic reticulum unfolded protein response                     | 0.0031481<br>49 | 0.0059078<br>69 | 3 |
| GO:00352<br>70 | endocrine system development                                        | 0.0031481<br>49 | 0.0059078<br>69 | 3 |
| GO:00485<br>93 | camera-type eye morphogenesis                                       | 0.0031481<br>49 | 0.0059078<br>69 | 3 |
| GO:19035<br>78 | regulation of ATP metabolic process                                 | 0.0031481<br>49 | 0.0059078<br>69 | 3 |
| GO:00030<br>15 | heart process                                                       | 0.0031506<br>92 | 0.0059078<br>69 | 3 |
| GO:00105<br>74 | regulation of vascular endothelial growth factor production         | 0.0031922<br>02 | 0.0059548<br>52 | 3 |
| GO:00330<br>13 | tetrapyrrole metabolic process                                      | 0.0031922<br>02 | 0.0059548<br>52 | 3 |



|                |                                                                                   |                 |                 |   |
|----------------|-----------------------------------------------------------------------------------|-----------------|-----------------|---|
| GO:00336<br>19 | membrane protein proteolysis                                                      | 0.0031922<br>02 | 0.0059548<br>52 | 3 |
| GO:00463<br>24 | regulation of glucose import                                                      | 0.0031922<br>02 | 0.0059548<br>52 | 3 |
| GO:19020<br>41 | regulation of extrinsic apoptotic signaling pathway via death domain receptors    | 0.0031922<br>02 | 0.0059548<br>52 | 3 |
| GO:00550<br>07 | cardiac muscle cell differentiation                                               | 0.0032395<br>44 | 0.0060369<br>4  | 3 |
| GO:00190<br>79 | viral genome replication                                                          | 0.0033327<br>32 | 0.0061820<br>58 | 3 |
| GO:00074<br>05 | neuroblast proliferation                                                          | 0.0033429<br>16 | 0.0061820<br>58 | 3 |
| GO:00427<br>72 | DNA damage response, signal transduction resulting in transcription               | 0.0033481<br>65 | 0.0061820<br>58 | 3 |
| GO:00510<br>23 | regulation of immunoglobulin secretion                                            | 0.0033481<br>65 | 0.0061820<br>58 | 3 |
| GO:00702<br>30 | positive regulation of lymphocyte apoptotic process                               | 0.0033481<br>65 | 0.0061820<br>58 | 3 |
| GO:00900<br>36 | regulation of protein kinase C signaling                                          | 0.0033481<br>65 | 0.0061820<br>58 | 3 |
| GO:00904<br>93 | catecholamine uptake                                                              | 0.0033481<br>65 | 0.0061820<br>58 | 3 |
| GO:01500<br>78 | positive regulation of neuroinflammatory response                                 | 0.0033481<br>65 | 0.0061820<br>58 | 3 |
| GO:20003<br>03 | regulation of ceramide biosynthetic process                                       | 0.0033481<br>65 | 0.0061820<br>58 | 3 |
| GO:00071<br>62 | negative regulation of cell adhesion                                              | 0.0033645<br>62 | 0.006206<br>58  | 3 |
| GO:00140<br>13 | regulation of gliogenesis                                                         | 0.0034277<br>33 | 0.0063160<br>82 | 3 |
| GO:00466<br>22 | positive regulation of organ growth                                               | 0.0034979<br>24 | 0.0064192<br>71 | 3 |
| GO:00518<br>93 | regulation of focal adhesion assembly                                             | 0.0034979<br>24 | 0.0064192<br>71 | 3 |
| GO:00700<br>59 | intrinsic apoptotic signaling pathway in response to endoplasmic reticulum stress | 0.0034979<br>24 | 0.0064192<br>71 | 3 |
| GO:00901<br>09 | regulation of cell-substrate junction assembly                                    | 0.0034979<br>24 | 0.0064192<br>71 | 3 |
| GO:00341<br>01 | erythrocyte homeostasis                                                           | 0.0035245<br>61 | 0.0064616<br>02 | 3 |
| GO:00094<br>10 | response to xenobiotic stimulus                                                   | 0.0036232<br>35 | 0.0066357<br>78 | 3 |
| GO:00018<br>85 | endothelial cell development                                                      | 0.0036572<br>65 | 0.0066643<br>75 | 3 |

|                |                                                                                       |                 |                 |   |
|----------------|---------------------------------------------------------------------------------------|-----------------|-----------------|---|
| GO:00454<br>53 | bone resorption                                                                       | 0.0036572<br>65 | 0.0066643<br>75 | 3 |
| GO:00519<br>26 | negative regulation of calcium ion transport                                          | 0.0036572<br>65 | 0.0066643<br>75 | 3 |
| GO:19004<br>49 | regulation of glutamate receptor signaling pathway                                    | 0.0036572<br>65 | 0.0066643<br>75 | 3 |
| GO:20004<br>01 | regulation of lymphocyte migration                                                    | 0.0036572<br>65 | 0.0066643<br>75 | 3 |
| GO:00420<br>63 | gliogenesis                                                                           | 0.0037054<br>57 | 0.0067097<br>38 | 3 |
| GO:00032<br>06 | cardiac chamber morphogenesis                                                         | 0.0037237<br>71 | 0.0067097<br>38 | 3 |
| GO:00032<br>31 | cardiac ventricle development                                                         | 0.0037237<br>71 | 0.0067097<br>38 | 3 |
| GO:00105<br>08 | positive regulation of autophagy                                                      | 0.0037237<br>71 | 0.0067097<br>38 | 3 |
| GO:00105<br>44 | negative regulation of platelet activation                                            | 0.0037303<br>64 | 0.0067097<br>38 | 3 |
| GO:00420<br>53 | regulation of dopamine metabolic process                                              | 0.0037303<br>64 | 0.0067097<br>38 | 3 |
| GO:00420<br>69 | regulation of catecholamine metabolic process                                         | 0.0037303<br>64 | 0.0067097<br>38 | 3 |
| GO:00602<br>52 | positive regulation of glial cell proliferation                                       | 0.0037303<br>64 | 0.0067097<br>38 | 3 |
| GO:00709<br>89 | oxidative demethylation                                                               | 0.0037303<br>64 | 0.0067097<br>38 | 3 |
| GO:00901<br>53 | regulation of sphingolipid biosynthetic process                                       | 0.0037303<br>64 | 0.0067097<br>38 | 3 |
| GO:19021<br>76 | negative regulation of oxidative stress-induced intrinsic apoptotic signaling pathway | 0.0037303<br>64 | 0.0067097<br>38 | 3 |
| GO:19050<br>38 | regulation of membrane lipid metabolic process                                        | 0.0037303<br>64 | 0.0067097<br>38 | 3 |
| GO:20000<br>10 | positive regulation of protein localization to cell surface                           | 0.0037303<br>64 | 0.0067097<br>38 | 3 |
| GO:19059<br>53 | negative regulation of lipid localization                                             | 0.0038209<br>76 | 0.0068658<br>94 | 3 |
| GO:00162<br>36 | macroautophagy                                                                        | 0.0038852<br>39 | 0.0069744<br>43 | 3 |
| GO:00327<br>68 | regulation of monooxygenase activity                                                  | 0.0039890<br>94 | 0.0071325<br>7  | 3 |
| GO:00466<br>26 | regulation of insulin receptor signaling pathway                                      | 0.0039890<br>94 | 0.0071325<br>7  | 3 |
| GO:01501<br>16 | regulation of cell-substrate junction organization                                    | 0.0039890<br>94 | 0.0071325<br>7  | 3 |

|                |                                                                  |                 |                 |   |
|----------------|------------------------------------------------------------------|-----------------|-----------------|---|
| GO:20003<br>78 | negative regulation of reactive oxygen species metabolic process | 0.0039890<br>94 | 0.0071325<br>7  | 3 |
| GO:00347<br>54 | cellular hormone metabolic process                               | 0.0040367<br>14 | 0.0072105<br>91 | 3 |
| GO:00072<br>52 | I-kappaB phosphorylation                                         | 0.0041318<br>92 | 0.0073353<br>52 | 3 |
| GO:00193<br>73 | epoxygenase P450 pathway                                         | 0.0041318<br>92 | 0.0073353<br>52 | 3 |
| GO:00324<br>95 | response to muramyl dipeptide                                    | 0.0041318<br>92 | 0.0073353<br>52 | 3 |
| GO:00517<br>67 | nitric-oxide synthase biosynthetic process                       | 0.0041318<br>92 | 0.0073353<br>52 | 3 |
| GO:00517<br>69 | regulation of nitric-oxide synthase biosynthetic process         | 0.0041318<br>92 | 0.0073353<br>52 | 3 |
| GO:19004<br>09 | positive regulation of cellular response to oxidative stress     | 0.0041318<br>92 | 0.0073353<br>52 | 3 |
| GO:00468<br>79 | hormone secretion                                                | 0.0041349<br>37 | 0.0073353<br>52 | 3 |
| GO:19036<br>72 | positive regulation of sprouting angiogenesis                    | 0.0041616<br>54 | 0.0073755<br>18 | 3 |
| GO:00457<br>27 | positive regulation of translation                               | 0.0042549<br>56 | 0.0075261<br>29 | 3 |
| GO:00506<br>71 | positive regulation of lymphocyte proliferation                  | 0.0042549<br>56 | 0.0075261<br>29 | 3 |
| GO:00316<br>69 | cellular response to nutrient levels                             | 0.0043363<br>58 | 0.0076369<br>14 | 3 |
| GO:00424<br>45 | hormone metabolic process                                        | 0.0043363<br>58 | 0.0076369<br>14 | 3 |
| GO:00162<br>39 | positive regulation of macroautophagy                            | 0.0043386<br>91 | 0.0076369<br>14 | 3 |
| GO:00454<br>28 | regulation of nitric oxide biosynthetic process                  | 0.0043386<br>91 | 0.0076369<br>14 | 3 |
| GO:00714<br>79 | cellular response to ionizing radiation                          | 0.0043386<br>91 | 0.0076369<br>14 | 3 |
| GO:00301<br>83 | B cell differentiation                                           | 0.0043670<br>09 | 0.0076718<br>32 | 3 |
| GO:00329<br>46 | positive regulation of mononuclear cell proliferation            | 0.0043670<br>09 | 0.0076718<br>32 | 3 |
| GO:00975<br>29 | myeloid leukocyte migration                                      | 0.0044196<br>93 | 0.0077568<br>55 | 3 |
| GO:00519<br>61 | negative regulation of nervous system development                | 0.0044635<br>66 | 0.0078262<br>64 | 3 |
| GO:00015<br>08 | action potential                                                 | 0.0044810<br>38 | 0.0078417<br>03 | 3 |

|                |                                                      |                 |                 |   |
|----------------|------------------------------------------------------|-----------------|-----------------|---|
| GO:00987<br>54 | detoxification                                       | 0.0044810<br>38 | 0.0078417<br>03 | 3 |
| GO:00600<br>38 | cardiac muscle cell proliferation                    | 0.0045202<br>39 | 0.0078754<br>59 | 3 |
| GO:00023<br>63 | alpha-beta T cell lineage commitment                 | 0.0045525<br>56 | 0.0078754<br>59 | 3 |
| GO:00068<br>37 | serotonin transport                                  | 0.0045525<br>56 | 0.0078754<br>59 | 3 |
| GO:00218<br>54 | hypothalamus development                             | 0.0045525<br>56 | 0.0078754<br>59 | 3 |
| GO:00302<br>20 | platelet formation                                   | 0.0045525<br>56 | 0.0078754<br>59 | 3 |
| GO:00307<br>28 | ovulation                                            | 0.0045525<br>56 | 0.0078754<br>59 | 3 |
| GO:00364<br>99 | PERK-mediated unfolded protein response              | 0.0045525<br>56 | 0.0078754<br>59 | 3 |
| GO:00468<br>23 | negative regulation of nucleocytoplasmic transport   | 0.0045525<br>56 | 0.0078754<br>59 | 3 |
| GO:00468<br>27 | positive regulation of protein export from nucleus   | 0.0045525<br>56 | 0.0078754<br>59 | 3 |
| GO:00483<br>05 | immunoglobulin secretion                             | 0.0045525<br>56 | 0.0078754<br>59 | 3 |
| GO:00903<br>12 | positive regulation of protein deacetylation         | 0.0045525<br>56 | 0.0078754<br>59 | 3 |
| GO:01404<br>67 | integrated stress response signaling                 | 0.0045525<br>56 | 0.0078754<br>59 | 3 |
| GO:00068<br>79 | cellular iron ion homeostasis                        | 0.0047063<br>31 | 0.0081336<br>98 | 3 |
| GO:00609<br>68 | regulation of gene silencing                         | 0.0047150<br>91 | 0.0081410<br>62 | 3 |
| GO:00099<br>14 | hormone transport                                    | 0.0047400<br>72 | 0.0081763<br>92 | 3 |
| GO:00328<br>69 | cellular response to insulin stimulus                | 0.0047644<br>92 | 0.0082106<br>88 | 3 |
| GO:00018<br>89 | liver development                                    | 0.0048351<br>46 | 0.0083245<br>18 | 3 |
| GO:00336<br>92 | cellular polysaccharide biosynthetic process         | 0.0048969<br>99 | 0.0084229<br>95 | 3 |
| GO:00321<br>02 | negative regulation of response to external stimulus | 0.0049461<br>29 | 0.0084994<br>2  | 3 |
| GO:00069<br>25 | inflammatory cell apoptotic process                  | 0.0049921<br>67 | 0.0085138<br>5  | 3 |
| GO:00092<br>35 | cobalamin metabolic process                          | 0.0049921<br>67 | 0.0085138<br>5  | 3 |

|                |                                                                              |                 |                 |   |
|----------------|------------------------------------------------------------------------------|-----------------|-----------------|---|
| GO:00108<br>88 | negative regulation of lipid storage                                         | 0.0049921<br>67 | 0.0085138<br>5  | 3 |
| GO:00320<br>69 | regulation of nuclease activity                                              | 0.0049921<br>67 | 0.0085138<br>5  | 3 |
| GO:00363<br>44 | platelet morphogenesis                                                       | 0.0049921<br>67 | 0.0085138<br>5  | 3 |
| GO:00433<br>69 | CD4-positive or CD8-positive, alpha-beta T cell lineage commitment           | 0.0049921<br>67 | 0.0085138<br>5  | 3 |
| GO:19028<br>84 | positive regulation of response to oxidative stress                          | 0.0049921<br>67 | 0.0085138<br>5  | 3 |
| GO:20004<br>79 | regulation of cAMP-dependent protein kinase activity                         | 0.0049921<br>67 | 0.0085138<br>5  | 3 |
| GO:00068<br>36 | neurotransmitter transport                                                   | 0.0050353<br>61 | 0.0085713<br>58 | 3 |
| GO:00487<br>62 | mesenchymal cell differentiation                                             | 0.0050353<br>61 | 0.0085713<br>58 | 3 |
| GO:00456<br>00 | positive regulation of fat cell differentiation                              | 0.0050922<br>75 | 0.0086519<br>61 | 3 |
| GO:00519<br>37 | catecholamine transport                                                      | 0.0050922<br>75 | 0.0086519<br>61 | 3 |
| GO:00610<br>08 | hepaticobiliary system development                                           | 0.0052076<br>12 | 0.0088230<br>69 | 3 |
| GO:01061<br>06 | cold-induced thermogenesis                                                   | 0.0052076<br>12 | 0.0088230<br>69 | 3 |
| GO:01201<br>61 | regulation of cold-induced thermogenesis                                     | 0.0052076<br>12 | 0.0088230<br>69 | 3 |
| GO:00519<br>66 | regulation of synaptic transmission, glutamatergic                           | 0.0052921<br>91 | 0.0089496<br>07 | 3 |
| GO:19037<br>47 | regulation of establishment of protein localization to mitochondrion         | 0.0052921<br>91 | 0.0089496<br>07 | 3 |
| GO:00020<br>52 | positive regulation of neuroblast proliferation                              | 0.0054505<br>37 | 0.0091574<br>78 | 3 |
| GO:00312<br>81 | positive regulation of cyclase activity                                      | 0.0054505<br>37 | 0.0091574<br>78 | 3 |
| GO:00456<br>49 | regulation of macrophage differentiation                                     | 0.0054505<br>37 | 0.0091574<br>78 | 3 |
| GO:00510<br>43 | regulation of membrane protein ectodomain proteolysis                        | 0.0054505<br>37 | 0.0091574<br>78 | 3 |
| GO:00860<br>12 | membrane depolarization during cardiac muscle cell action potential          | 0.0054505<br>37 | 0.0091574<br>78 | 3 |
| GO:19000<br>17 | positive regulation of cytokine production involved in inflammatory response | 0.0054505<br>37 | 0.0091574<br>78 | 3 |
| GO:20001<br>78 | negative regulation of neural precursor cell proliferation                   | 0.0054505<br>37 | 0.0091574<br>78 | 3 |

|                |                                                                         |                 |                 |   |
|----------------|-------------------------------------------------------------------------|-----------------|-----------------|---|
| GO:00346<br>20 | cellular response to unfolded protein                                   | 0.0054663<br>3  | 0.0091754<br>92 | 3 |
| GO:00215<br>36 | diencephalon development                                                | 0.0054967<br>75 | 0.0092009<br>89 | 3 |
| GO:00860<br>03 | cardiac muscle cell contraction                                         | 0.0054967<br>75 | 0.0092009<br>89 | 3 |
| GO:20012<br>59 | positive regulation of cation channel activity                          | 0.0054967<br>75 | 0.0092009<br>89 | 3 |
| GO:00515<br>92 | response to calcium ion                                                 | 0.0055988<br>57 | 0.0093632<br>02 | 3 |
| GO:00463<br>23 | glucose import                                                          | 0.0057060<br>57 | 0.0095045<br>83 | 3 |
| GO:00508<br>05 | negative regulation of synaptic transmission                            | 0.0057060<br>57 | 0.0095045<br>83 | 3 |
| GO:00860<br>01 | cardiac muscle cell action potential                                    | 0.0057060<br>57 | 0.0095045<br>83 | 3 |
| GO:19000<br>76 | regulation of cellular response to insulin stimulus                     | 0.0057060<br>57 | 0.0095045<br>83 | 3 |
| GO:00605<br>60 | developmental growth involved in morphogenesis                          | 0.0057096<br>61 | 0.0095045<br>83 | 3 |
| GO:00082<br>77 | regulation of G protein-coupled receptor signaling pathway              | 0.0057335<br>16 | 0.0095355<br>2  | 3 |
| GO:00467<br>77 | protein autophosphorylation                                             | 0.0058109<br>43 | 0.0096465<br>58 | 3 |
| GO:00485<br>88 | developmental cell growth                                               | 0.0058109<br>43 | 0.0096465<br>58 | 3 |
| GO:00335<br>55 | multicellular organismal response to stress                             | 0.0059200<br>66 | 0.0097594<br>34 | 3 |
| GO:00720<br>91 | regulation of stem cell proliferation                                   | 0.0059200<br>66 | 0.0097594<br>34 | 3 |
| GO:19016<br>16 | organic hydroxy compound catabolic process                              | 0.0059200<br>66 | 0.0097594<br>34 | 3 |
| GO:00106<br>40 | regulation of platelet-derived growth factor receptor signaling pathway | 0.0059274<br>79 | 0.0097594<br>34 | 3 |
| GO:00324<br>69 | endoplasmic reticulum calcium ion homeostasis                           | 0.0059274<br>79 | 0.0097594<br>34 | 3 |
| GO:00427<br>38 | exogenous drug catabolic process                                        | 0.0059274<br>79 | 0.0097594<br>34 | 3 |
| GO:00903<br>35 | regulation of brown fat cell differentiation                            | 0.0059274<br>79 | 0.0097594<br>34 | 3 |
| GO:20002<br>09 | regulation of anoikis                                                   | 0.0059274<br>79 | 0.0097594<br>34 | 3 |
| GO:20006<br>37 | positive regulation of gene silencing by miRNA                          | 0.0059274<br>79 | 0.0097594<br>34 | 3 |

|                |                                                              |                 |                 |   |
|----------------|--------------------------------------------------------------|-----------------|-----------------|---|
| GO:00706<br>65 | positive regulation of leukocyte proliferation               | 0.0060092<br>91 | 0.0098851<br>4  | 3 |
| GO:00140<br>15 | positive regulation of gliogenesis                           | 0.0061388<br>3  | 0.0100799<br>01 | 3 |
| GO:19032<br>01 | regulation of oxidative stress-induced cell death            | 0.0061388<br>3  | 0.0100799<br>01 | 3 |
| GO:00512<br>24 | negative regulation of protein transport                     | 0.0061504<br>36 | 0.0100898<br>03 | 3 |
| GO:00380<br>93 | Fc receptor signaling pathway                                | 0.0062287<br>84 | 0.0102090<br>76 | 3 |
| GO:00002<br>71 | polysaccharide biosynthetic process                          | 0.0063623<br>76 | 0.0104091<br>78 | 3 |
| GO:00439<br>00 | regulation of multi-organism process                         | 0.0063623<br>76 | 0.0104091<br>78 | 3 |
| GO:00107<br>38 | regulation of protein kinase A signaling                     | 0.0064228<br>07 | 0.0104325<br>85 | 3 |
| GO:00518<br>94 | positive regulation of focal adhesion assembly               | 0.0064228<br>07 | 0.0104325<br>85 | 3 |
| GO:00601<br>48 | positive regulation of posttranscriptional gene silencing    | 0.0064228<br>07 | 0.0104325<br>85 | 3 |
| GO:00605<br>71 | morphogenesis of an epithelial fold                          | 0.0064228<br>07 | 0.0104325<br>85 | 3 |
| GO:00605<br>75 | intestinal epithelial cell differentiation                   | 0.0064228<br>07 | 0.0104325<br>85 | 3 |
| GO:00606<br>69 | embryonic placenta morphogenesis                             | 0.0064228<br>07 | 0.0104325<br>85 | 3 |
| GO:19043<br>85 | cellular response to angiotensin                             | 0.0064228<br>07 | 0.0104325<br>85 | 3 |
| GO:20010<br>26 | regulation of endothelial cell chemotaxis                    | 0.0064228<br>07 | 0.0104325<br>85 | 3 |
| GO:00458<br>34 | positive regulation of lipid metabolic process               | 0.0064393<br>16 | 0.0104500<br>21 | 3 |
| GO:00072<br>65 | Ras protein signal transduction                              | 0.0065815<br>34 | 0.0106479<br>92 | 3 |
| GO:00613<br>51 | neural precursor cell proliferation                          | 0.0065870<br>8  | 0.0106479<br>92 | 3 |
| GO:00108<br>27 | regulation of glucose transmembrane transport                | 0.0065907<br>29 | 0.0106479<br>92 | 3 |
| GO:00422<br>46 | tissue regeneration                                          | 0.0065907<br>29 | 0.0106479<br>92 | 3 |
| GO:00996<br>01 | regulation of neurotransmitter receptor activity             | 0.0065907<br>29 | 0.0106479<br>92 | 3 |
| GO:19049<br>50 | negative regulation of establishment of protein localization | 0.0067370<br>79 | 0.0108650<br>33 | 3 |

|                |                                                              |                 |                 |   |
|----------------|--------------------------------------------------------------|-----------------|-----------------|---|
| GO:19908<br>45 | adaptive thermogenesis                                       | 0.0067370<br>79 | 0.0108650<br>33 | 3 |
| GO:00064<br>69 | negative regulation of protein kinase activity               | 0.0067803<br>05 | 0.0109250<br>08 | 3 |
| GO:00031<br>51 | outflow tract morphogenesis                                  | 0.0068239<br>17 | 0.0109757<br>32 | 3 |
| GO:19012<br>24 | positive regulation of NIK/NF-kappaB signaling               | 0.0068239<br>17 | 0.0109757<br>32 | 3 |
| GO:00096<br>15 | response to virus                                            | 0.0068553<br>11 | 0.0110164<br>34 | 3 |
| GO:00083<br>60 | regulation of cell shape                                     | 0.0068893<br>27 | 0.0110612<br>75 | 3 |
| GO:00020<br>68 | glandular epithelial cell development                        | 0.0069363<br>36 | 0.0110777<br>73 | 3 |
| GO:00189<br>04 | ether metabolic process                                      | 0.0069363<br>36 | 0.0110777<br>73 | 3 |
| GO:00194<br>30 | removal of superoxide radicals                               | 0.0069363<br>36 | 0.0110777<br>73 | 3 |
| GO:00359<br>02 | response to immobilization stress                            | 0.0069363<br>36 | 0.0110777<br>73 | 3 |
| GO:00427<br>37 | drug catabolic process                                       | 0.0069363<br>36 | 0.0110777<br>73 | 3 |
| GO:00511<br>23 | RNA polymerase II preinitiation complex assembly             | 0.0069363<br>36 | 0.0110777<br>73 | 3 |
| GO:00217<br>66 | hippocampus development                                      | 0.0070619<br>63 | 0.0112684<br>63 | 3 |
| GO:00350<br>51 | cardiocyte differentiation                                   | 0.0072006<br>28 | 0.0114694<br>95 | 3 |
| GO:00507<br>29 | positive regulation of inflammatory response                 | 0.0072006<br>28 | 0.0114694<br>95 | 3 |
| GO:00015<br>56 | oocyte maturation                                            | 0.0074678<br>83 | 0.0118120<br>08 | 3 |
| GO:00020<br>21 | response to dietary excess                                   | 0.0074678<br>83 | 0.0118120<br>08 | 3 |
| GO:00020<br>26 | regulation of the force of heart contraction                 | 0.0074678<br>83 | 0.0118120<br>08 | 3 |
| GO:00109<br>71 | positive regulation of G2/M transition of mitotic cell cycle | 0.0074678<br>83 | 0.0118120<br>08 | 3 |
| GO:00456<br>72 | positive regulation of osteoclast differentiation            | 0.0074678<br>83 | 0.0118120<br>08 | 3 |
| GO:00481<br>43 | astrocyte activation                                         | 0.0074678<br>83 | 0.0118120<br>08 | 3 |
| GO:19032<br>03 | regulation of oxidative stress-induced neuron death          | 0.0074678<br>83 | 0.0118120<br>08 | 3 |



|                |                                                           |                 |                 |   |
|----------------|-----------------------------------------------------------|-----------------|-----------------|---|
| GO:20003<br>53 | positive regulation of endothelial cell apoptotic process | 0.0074678<br>83 | 0.0118120<br>08 | 3 |
| GO:00148<br>55 | striated muscle cell proliferation                        | 0.0075527<br>29 | 0.0118942<br>25 | 3 |
| GO:00550<br>13 | cardiac muscle cell development                           | 0.0075527<br>29 | 0.0118942<br>25 | 3 |
| GO:00551<br>17 | regulation of cardiac muscle contraction                  | 0.0075527<br>29 | 0.0118942<br>25 | 3 |
| GO:00712<br>77 | cellular response to calcium ion                          | 0.0075527<br>29 | 0.0118942<br>25 | 3 |
| GO:20002<br>43 | positive regulation of reproductive process               | 0.0075527<br>29 | 0.0118942<br>25 | 3 |
| GO:00518<br>96 | regulation of protein kinase B signaling                  | 0.0076087<br>94 | 0.0119720<br>98 | 3 |
| GO:00512<br>51 | positive regulation of lymphocyte activation              | 0.0076258<br>08 | 0.0119884<br>44 | 3 |
| GO:00140<br>31 | mesenchymal cell development                              | 0.0078054<br>95 | 0.0122390<br>28 | 3 |
| GO:00302<br>79 | negative regulation of ossification                       | 0.0078054<br>95 | 0.0122390<br>28 | 3 |
| GO:00459<br>13 | positive regulation of carbohydrate metabolic process     | 0.0078054<br>95 | 0.0122390<br>28 | 3 |
| GO:00459<br>32 | negative regulation of muscle contraction                 | 0.0080172<br>66 | 0.0125091<br>08 | 3 |
| GO:00714<br>50 | cellular response to oxygen radical                       | 0.0080172<br>66 | 0.0125091<br>08 | 3 |
| GO:00714<br>51 | cellular response to superoxide                           | 0.0080172<br>66 | 0.0125091<br>08 | 3 |
| GO:00723<br>76 | protein activation cascade                                | 0.0080172<br>66 | 0.0125091<br>08 | 3 |
| GO:00723<br>78 | blood coagulation, fibrin clot formation                  | 0.0080172<br>66 | 0.0125091<br>08 | 3 |
| GO:00092<br>67 | cellular response to starvation                           | 0.0080192<br>18 | 0.0125091<br>08 | 3 |
| GO:00458<br>44 | positive regulation of striated muscle tissue development | 0.0080632<br>13 | 0.0125452<br>89 | 3 |
| GO:00486<br>36 | positive regulation of muscle organ development           | 0.0080632<br>13 | 0.0125452<br>89 | 3 |
| GO:01101<br>10 | positive regulation of animal organ morphogenesis         | 0.0080632<br>13 | 0.0125452<br>89 | 3 |
| GO:00109<br>51 | negative regulation of endopeptidase activity             | 0.0082421<br>84 | 0.0128127<br>28 | 3 |
| GO:00346<br>37 | cellular carbohydrate biosynthetic process                | 0.0083259<br>04 | 0.0129096<br>01 | 3 |

|                |                                                                 |                 |                 |   |
|----------------|-----------------------------------------------------------------|-----------------|-----------------|---|
| GO:19018<br>63 | positive regulation of muscle tissue development                | 0.0083259<br>04 | 0.0129096<br>01 | 3 |
| GO:20001<br>06 | regulation of leukocyte apoptotic process                       | 0.0083259<br>04 | 0.0129096<br>01 | 3 |
| GO:00094<br>08 | response to heat                                                | 0.0085385<br>75 | 0.0132002<br>33 | 3 |
| GO:00359<br>67 | cellular response to topologically incorrect protein            | 0.0085385<br>75 | 0.0132002<br>33 | 3 |
| GO:00072<br>63 | nitric oxide mediated signal transduction                       | 0.0085843<br>06 | 0.0132002<br>33 | 3 |
| GO:00190<br>48 | modulation by virus of host process                             | 0.0085843<br>06 | 0.0132002<br>33 | 3 |
| GO:00310<br>63 | regulation of histone deacetylation                             | 0.0085843<br>06 | 0.0132002<br>33 | 3 |
| GO:00488<br>73 | homeostasis of number of cells within a tissue                  | 0.0085843<br>06 | 0.0132002<br>33 | 3 |
| GO:01501<br>17 | positive regulation of cell-substrate junction organization     | 0.0085843<br>06 | 0.0132002<br>33 | 3 |
| GO:20001<br>08 | positive regulation of leukocyte apoptotic process              | 0.0085843<br>06 | 0.0132002<br>33 | 3 |
| GO:00019<br>42 | hair follicle development                                       | 0.0085935<br>89 | 0.0132002<br>33 | 3 |
| GO:00550<br>72 | iron ion homeostasis                                            | 0.0085935<br>89 | 0.0132002<br>33 | 3 |
| GO:00900<br>49 | regulation of cell migration involved in sprouting angiogenesis | 0.0085935<br>89 | 0.0132002<br>33 | 3 |
| GO:00020<br>28 | regulation of sodium ion transport                              | 0.0088662<br>89 | 0.0135960<br>32 | 3 |
| GO:00700<br>98 | chemokine-mediated signaling pathway                            | 0.0088662<br>89 | 0.0135960<br>32 | 3 |
| GO:00458<br>61 | negative regulation of proteolysis                              | 0.0088964<br>43 | 0.0136307<br>19 | 3 |
| GO:00380<br>95 | Fc-epsilon receptor signaling pathway                           | 0.0090795<br>18 | 0.0138834<br>66 | 3 |
| GO:00550<br>02 | striated muscle cell development                                | 0.0090795<br>18 | 0.0138834<br>66 | 3 |
| GO:00224<br>04 | molting cycle process                                           | 0.0091440<br>24 | 0.0138834<br>66 | 3 |
| GO:00224<br>05 | hair cycle process                                              | 0.0091440<br>24 | 0.0138834<br>66 | 3 |
| GO:00550<br>06 | cardiac cell development                                        | 0.0091440<br>24 | 0.0138834<br>66 | 3 |
| GO:00003<br>03 | response to superoxide                                          | 0.0091688<br>22 | 0.0138834<br>66 | 3 |

|                |                                                                                 |                 |                 |   |
|----------------|---------------------------------------------------------------------------------|-----------------|-----------------|---|
| GO:00015<br>16 | prostaglandin biosynthetic process                                              | 0.0091688<br>22 | 0.0138834<br>66 | 3 |
| GO:00072<br>71 | synaptic transmission, cholinergic                                              | 0.0091688<br>22 | 0.0138834<br>66 | 3 |
| GO:00199<br>34 | cGMP-mediated signaling                                                         | 0.0091688<br>22 | 0.0138834<br>66 | 3 |
| GO:00364<br>75 | neuron death in response to oxidative stress                                    | 0.0091688<br>22 | 0.0138834<br>66 | 3 |
| GO:00464<br>57 | prostanoid biosynthetic process                                                 | 0.0091688<br>22 | 0.0138834<br>66 | 3 |
| GO:00481<br>47 | negative regulation of fibroblast proliferation                                 | 0.0091688<br>22 | 0.0138834<br>66 | 3 |
| GO:00714<br>80 | cellular response to gamma radiation                                            | 0.0091688<br>22 | 0.0138834<br>66 | 3 |
| GO:19027<br>51 | positive regulation of cell cycle G2/M phase transition                         | 0.0091688<br>22 | 0.0138834<br>66 | 3 |
| GO:00434<br>70 | regulation of carbohydrate catabolic process                                    | 0.0094268<br>11 | 0.0142502<br>64 | 3 |
| GO:00987<br>73 | skin epidermis development                                                      | 0.0094268<br>11 | 0.0142502<br>64 | 3 |
| GO:00303<br>07 | positive regulation of cell growth                                              | 0.0094523<br>09 | 0.0142768<br>82 | 3 |
| GO:00336<br>73 | negative regulation of kinase activity                                          | 0.0096172<br>88 | 0.0145139<br>52 | 3 |
| GO:00507<br>14 | positive regulation of protein secretion                                        | 0.0096423<br>91 | 0.0145276<br>05 | 3 |
| GO:19901<br>38 | neuron projection extension                                                     | 0.0096423<br>91 | 0.0145276<br>05 | 3 |
| GO:00468<br>49 | bone remodeling                                                                 | 0.0097146<br>7  | 0.0145992<br>64 | 3 |
| GO:00484<br>77 | oogenesis                                                                       | 0.0097146<br>7  | 0.0145992<br>64 | 3 |
| GO:19040<br>63 | negative regulation of cation transmembrane transport                           | 0.0097146<br>7  | 0.0145992<br>64 | 3 |
| GO:00003<br>05 | response to oxygen radical                                                      | 0.0097706<br>36 | 0.0145992<br>64 | 3 |
| GO:00140<br>72 | response to isoquinoline alkaloid                                               | 0.0097706<br>36 | 0.0145992<br>64 | 3 |
| GO:00432<br>78 | response to morphine                                                            | 0.0097706<br>36 | 0.0145992<br>64 | 3 |
| GO:00459<br>48 | positive regulation of translational initiation                                 | 0.0097706<br>36 | 0.0145992<br>64 | 3 |
| GO:00602<br>61 | positive regulation of transcription initiation from RNA polymerase II promoter | 0.0097706<br>36 | 0.0145992<br>64 | 3 |

|                |                                                                           |                 |                 |   |
|----------------|---------------------------------------------------------------------------|-----------------|-----------------|---|
| GO:00860<br>11 | membrane repolarization during action potential                           | 0.0097706<br>36 | 0.0145992<br>64 | 3 |
| GO:19022<br>53 | regulation of intrinsic apoptotic signaling pathway by p53 class mediator | 0.0097706<br>36 | 0.0145992<br>64 | 3 |
| GO:00332<br>09 | tumor necrosis factor-mediated signaling pathway                          | 0.0098349<br>47 | 0.0146832<br>32 | 3 |
| GO:00310<br>58 | positive regulation of histone modification                               | 0.0100076<br>18 | 0.0149287<br>07 | 3 |
| GO:00357<br>25 | sodium ion transmembrane transport                                        | 0.0100299<br>89 | 0.0149497<br>53 | 3 |
| GO:00068<br>39 | mitochondrial transport                                                   | 0.0100588<br>74 | 0.0149804<br>68 | 3 |
| GO:00104<br>66 | negative regulation of peptidase activity                                 | 0.0102091<br>2  | 0.0151917<br>21 | 3 |
| GO:00326<br>77 | regulation of interleukin-8 production                                    | 0.0103056<br>72 | 0.0153227<br>96 | 3 |
| GO:00082<br>10 | estrogen metabolic process                                                | 0.0103895<br>73 | 0.0153591<br>98 | 3 |
| GO:00357<br>67 | endothelial cell chemotaxis                                               | 0.0103895<br>73 | 0.0153591<br>98 | 3 |
| GO:00519<br>68 | positive regulation of synaptic transmission, glutamatergic               | 0.0103895<br>73 | 0.0153591<br>98 | 3 |
| GO:00705<br>28 | protein kinase C signaling                                                | 0.0103895<br>73 | 0.0153591<br>98 | 3 |
| GO:00860<br>19 | cell-cell signaling involved in cardiac conduction                        | 0.0103895<br>73 | 0.0153591<br>98 | 3 |
| GO:00974<br>21 | liver regeneration                                                        | 0.0103895<br>73 | 0.0153591<br>98 | 3 |
| GO:19018<br>89 | negative regulation of cell junction assembly                             | 0.0103895<br>73 | 0.0153591<br>98 | 3 |
| GO:00325<br>35 | regulation of cellular component size                                     | 0.0105633<br>55 | 0.0156033<br>58 | 3 |
| GO:19019<br>92 | positive regulation of mitotic cell cycle phase transition                | 0.0106088<br>49 | 0.0156577<br>76 | 3 |
| GO:00303<br>24 | lung development                                                          | 0.0106301<br>5  | 0.0156764<br>28 | 3 |
| GO:00072<br>81 | germ cell development                                                     | 0.0106691<br>08 | 0.0157210<br>67 | 3 |
| GO:00313<br>49 | positive regulation of defense response                                   | 0.0108184<br>38 | 0.0159281<br>35 | 3 |
| GO:00518<br>97 | positive regulation of protein kinase B signaling                         | 0.0108352<br>55 | 0.0159399<br>26 | 3 |
| GO:00330<br>28 | myeloid cell apoptotic process                                            | 0.0110254<br>56 | 0.0161802<br>7  | 3 |

|                |                                                                                  |                 |                 |   |
|----------------|----------------------------------------------------------------------------------|-----------------|-----------------|---|
| GO:00457<br>36 | negative regulation of cyclin-dependent protein serine/threonine kinase activity | 0.0110254<br>56 | 0.0161802<br>7  | 3 |
| GO:00466<br>27 | negative regulation of insulin receptor signaling pathway                        | 0.0110254<br>56 | 0.0161802<br>7  | 3 |
| GO:00352<br>49 | synaptic transmission, glutamatergic                                             | 0.0112306<br>35 | 0.0164680<br>21 | 3 |
| GO:00303<br>23 | respiratory tube development                                                     | 0.0114658<br>84 | 0.0167993<br>65 | 3 |
| GO:00326<br>51 | regulation of interleukin-1 beta production                                      | 0.0115492<br>73 | 0.0168805<br>38 | 3 |
| GO:19908<br>68 | response to chemokine                                                            | 0.0115492<br>73 | 0.0168805<br>38 | 3 |
| GO:19908<br>69 | cellular response to chemokine                                                   | 0.0115492<br>73 | 0.0168805<br>38 | 3 |
| GO:00107<br>65 | positive regulation of sodium ion transport                                      | 0.0116781<br>12 | 0.0169320<br>8  | 3 |
| GO:00162<br>42 | negative regulation of macroautophagy                                            | 0.0116781<br>12 | 0.0169320<br>8  | 3 |
| GO:00304<br>31 | sleep                                                                            | 0.0116781<br>12 | 0.0169320<br>8  | 3 |
| GO:00321<br>48 | activation of protein kinase B activity                                          | 0.0116781<br>12 | 0.0169320<br>8  | 3 |
| GO:00423<br>11 | vasodilation                                                                     | 0.0116781<br>12 | 0.0169320<br>8  | 3 |
| GO:00456<br>48 | positive regulation of erythrocyte differentiation                               | 0.0116781<br>12 | 0.0169320<br>8  | 3 |
| GO:00485<br>66 | embryonic digestive tract development                                            | 0.0116781<br>12 | 0.0169320<br>8  | 3 |
| GO:00700<br>50 | neuron cellular homeostasis                                                      | 0.0116781<br>12 | 0.0169320<br>8  | 3 |
| GO:00702<br>32 | regulation of T cell apoptotic process                                           | 0.0116781<br>12 | 0.0169320<br>8  | 3 |
| GO:19040<br>30 | negative regulation of cyclin-dependent protein kinase activity                  | 0.0116781<br>12 | 0.0169320<br>8  | 3 |
| GO:00069<br>42 | regulation of striated muscle contraction                                        | 0.0118730<br>94 | 0.0171837<br>59 | 3 |
| GO:00303<br>16 | osteoclast differentiation                                                       | 0.0118730<br>94 | 0.0171837<br>59 | 3 |
| GO:00019<br>59 | regulation of cytokine-mediated signaling pathway                                | 0.0118991<br>78 | 0.0171837<br>59 | 3 |
| GO:00069<br>86 | response to unfolded protein                                                     | 0.0118991<br>78 | 0.0171837<br>59 | 3 |
| GO:00550<br>01 | muscle cell development                                                          | 0.0118991<br>78 | 0.0171837<br>59 | 3 |

|            |                                                                           |             |             |   |
|------------|---------------------------------------------------------------------------|-------------|-------------|---|
| GO:0001822 | kidney development                                                        | 0.011964864 | 0.017251081 | 3 |
| GO:0016579 | protein deubiquitination                                                  | 0.011964864 | 0.017251081 | 3 |
| GO:0022900 | electron transport chain                                                  | 0.012119721 | 0.017446552 | 3 |
| GO:0038061 | NIK/NF-kappaB signaling                                                   | 0.012119721 | 0.017446552 | 3 |
| GO:0043255 | regulation of carbohydrate biosynthetic process                           | 0.012202112 | 0.017537252 | 3 |
| GO:0051817 | modulation of process of other organism involved in symbiotic interaction | 0.012202112 | 0.017537252 | 3 |
| GO:0006691 | leukotriene metabolic process                                             | 0.012347367 | 0.017661846 | 3 |
| GO:0060674 | placenta blood vessel development                                         | 0.012347367 | 0.017661846 | 3 |
| GO:0070884 | regulation of calcineurin-NFAT signaling cascade                          | 0.012347367 | 0.017661846 | 3 |
| GO:0071312 | cellular response to alkaloid                                             | 0.012347367 | 0.017661846 | 3 |
| GO:0110111 | negative regulation of animal organ morphogenesis                         | 0.012347367 | 0.017661846 | 3 |
| GO:1900077 | negative regulation of cellular response to insulin stimulus              | 0.012347367 | 0.017661846 | 3 |
| GO:0045069 | regulation of viral genome replication                                    | 0.012536338 | 0.017903847 | 3 |
| GO:0070301 | cellular response to hydrogen peroxide                                    | 0.012536338 | 0.017903847 | 3 |
| GO:0043488 | regulation of mRNA stability                                              | 0.012568651 | 0.017907593 | 3 |
| GO:0050770 | regulation of axonogenesis                                                | 0.012568651 | 0.017907593 | 3 |
| GO:0051147 | regulation of muscle cell differentiation                                 | 0.012568651 | 0.017907593 | 3 |
| GO:0007215 | glutamate receptor signaling pathway                                      | 0.012875787 | 0.018301962 | 3 |
| GO:0019217 | regulation of fatty acid metabolic process                                | 0.012875787 | 0.018301962 | 3 |
| GO:0042116 | macrophage activation                                                     | 0.012875787 | 0.018301962 | 3 |
| GO:0051783 | regulation of nuclear division                                            | 0.01302811  | 0.018409805 | 3 |
| GO:0001569 | branching involved in blood vessel morphogenesis                          | 0.01303305  | 0.018409805 | 3 |

|                |                                                                        |                 |                 |   |
|----------------|------------------------------------------------------------------------|-----------------|-----------------|---|
| GO:00315<br>72 | G2 DNA damage checkpoint                                               | 0.0130330<br>5  | 0.0184098<br>05 | 3 |
| GO:00344<br>05 | response to fluid shear stress                                         | 0.0130330<br>5  | 0.0184098<br>05 | 3 |
| GO:00433<br>68 | positive T cell selection                                              | 0.0130330<br>5  | 0.0184098<br>05 | 3 |
| GO:00716<br>34 | regulation of transforming growth factor beta production               | 0.0130330<br>5  | 0.0184098<br>05 | 3 |
| GO:01060<br>56 | regulation of calcineurin-mediated signaling                           | 0.0130330<br>5  | 0.0184098<br>05 | 3 |
| GO:20003<br>10 | regulation of NMDA receptor activity                                   | 0.0130330<br>5  | 0.0184098<br>05 | 3 |
| GO:00604<br>85 | mesenchyme development                                                 | 0.0131833<br>41 | 0.0185930<br>69 | 3 |
| GO:19021<br>05 | regulation of leukocyte differentiation                                | 0.0131833<br>41 | 0.0185930<br>69 | 3 |
| GO:00435<br>02 | regulation of muscle adaptation                                        | 0.0132204<br>69 | 0.0186164<br>12 | 3 |
| GO:19030<br>76 | regulation of protein localization to plasma membrane                  | 0.0132204<br>69 | 0.0186164<br>12 | 3 |
| GO:00510<br>48 | negative regulation of secretion                                       | 0.0134981<br>82 | 0.0189926<br>94 | 3 |
| GO:00720<br>01 | renal system development                                               | 0.0135463<br>45 | 0.0190456<br>53 | 3 |
| GO:00329<br>41 | secretion by tissue                                                    | 0.0137349<br>9  | 0.0192212<br>71 | 3 |
| GO:00432<br>43 | positive regulation of protein-containing complex disassembly          | 0.0137349<br>9  | 0.0192212<br>71 | 3 |
| GO:00602<br>60 | regulation of transcription initiation from RNA polymerase II promoter | 0.0137349<br>9  | 0.0192212<br>71 | 3 |
| GO:00704<br>23 | nucleotide-binding oligomerization domain containing signaling pathway | 0.0137349<br>9  | 0.0192212<br>71 | 3 |
| GO:00708<br>97 | transcription preinitiation complex assembly                           | 0.0137349<br>9  | 0.0192212<br>71 | 3 |
| GO:00903<br>22 | regulation of superoxide metabolic process                             | 0.0137349<br>9  | 0.0192212<br>71 | 3 |
| GO:00026<br>96 | positive regulation of leukocyte activation                            | 0.0137668<br>81 | 0.0192510<br>11 | 3 |
| GO:00075<br>17 | muscle organ development                                               | 0.0139199<br>94 | 0.0194500<br>87 | 3 |
| GO:00027<br>93 | positive regulation of peptide secretion                               | 0.0142233<br>63 | 0.0198586<br>43 | 3 |
| GO:00215<br>49 | cerebellum development                                                 | 0.0142860<br>26 | 0.0199244<br>57 | 3 |

|                |                                                                                      |                 |                 |   |
|----------------|--------------------------------------------------------------------------------------|-----------------|-----------------|---|
| GO:00316<br>47 | regulation of protein stability                                                      | 0.0142925<br>24 | 0.0199244<br>57 | 3 |
| GO:00358<br>72 | nucleotide-binding domain, leucine rich repeat containing receptor signaling pathway | 0.0144530<br>19 | 0.0200401<br>21 | 3 |
| GO:00440<br>03 | modulation by symbiont of host process                                               | 0.0144530<br>19 | 0.0200401<br>21 | 3 |
| GO:00480<br>09 | insulin-like growth factor receptor signaling pathway                                | 0.0144530<br>19 | 0.0200401<br>21 | 3 |
| GO:00600<br>45 | positive regulation of cardiac muscle cell proliferation                             | 0.0144530<br>19 | 0.0200401<br>21 | 3 |
| GO:00713<br>92 | cellular response to estradiol stimulus                                              | 0.0144530<br>19 | 0.0200401<br>21 | 3 |
| GO:00716<br>04 | transforming growth factor beta production                                           | 0.0144530<br>19 | 0.0200401<br>21 | 3 |
| GO:00860<br>05 | ventricular cardiac muscle cell action potential                                     | 0.0144530<br>19 | 0.0200401<br>21 | 3 |
| GO:00192<br>33 | sensory perception of pain                                                           | 0.0146517<br>49 | 0.0202535<br>94 | 3 |
| GO:00193<br>95 | fatty acid oxidation                                                                 | 0.0146517<br>49 | 0.0202535<br>94 | 3 |
| GO:00326<br>11 | interleukin-1 beta production                                                        | 0.0146517<br>49 | 0.0202535<br>94 | 3 |
| GO:19052<br>69 | positive regulation of chromatin organization                                        | 0.0146517<br>49 | 0.0202535<br>94 | 3 |
| GO:00434<br>87 | regulation of RNA stability                                                          | 0.0147203<br>13 | 0.0203328<br>39 | 3 |
| GO:00020<br>40 | sprouting angiogenesis                                                               | 0.0149728<br>66 | 0.0206501<br>57 | 3 |
| GO:00607<br>59 | regulation of response to cytokine stimulus                                          | 0.0149728<br>66 | 0.0206501<br>57 | 3 |
| GO:19034<br>26 | regulation of reactive oxygen species biosynthetic process                           | 0.0150227<br>57 | 0.0207031<br>86 | 3 |
| GO:00706<br>46 | protein modification by small protein removal                                        | 0.0150659<br>42 | 0.0207468<br>99 | 3 |
| GO:00071<br>90 | activation of adenylate cyclase activity                                             | 0.0151869<br>68 | 0.0207712<br>92 | 3 |
| GO:00107<br>37 | protein kinase A signaling                                                           | 0.0151869<br>68 | 0.0207712<br>92 | 3 |
| GO:00108<br>31 | positive regulation of myotube differentiation                                       | 0.0151869<br>68 | 0.0207712<br>92 | 3 |
| GO:00140<br>37 | Schwann cell differentiation                                                         | 0.0151869<br>68 | 0.0207712<br>92 | 3 |
| GO:00331<br>46 | regulation of intracellular estrogen receptor signaling pathway                      | 0.0151869<br>68 | 0.0207712<br>92 | 2 |



|                |                                                        |                 |                 |   |
|----------------|--------------------------------------------------------|-----------------|-----------------|---|
| GO:00358<br>86 | vascular associated smooth muscle cell differentiation | 0.0151869<br>68 | 0.0207712<br>92 | 2 |
| GO:00463<br>26 | positive regulation of glucose import                  | 0.0151869<br>68 | 0.0207712<br>92 | 2 |
| GO:00604<br>16 | response to growth hormone                             | 0.0151869<br>68 | 0.0207712<br>92 | 2 |
| GO:20002<br>79 | negative regulation of DNA biosynthetic process        | 0.0151869<br>68 | 0.0207712<br>92 | 2 |
| GO:00106<br>39 | negative regulation of organelle organization          | 0.0153521<br>22 | 0.0209813<br>15 | 2 |
| GO:00325<br>26 | response to retinoic acid                              | 0.0153990<br>58 | 0.0210295<br>78 | 2 |
| GO:00106<br>13 | positive regulation of cardiac muscle hypertrophy      | 0.0159366<br>71 | 0.0217309<br>62 | 2 |
| GO:00439<br>02 | positive regulation of multi-organism process          | 0.0159366<br>71 | 0.0217309<br>62 | 2 |
| GO:00103<br>89 | regulation of G2/M transition of mitotic cell cycle    | 0.0160104<br>71 | 0.0217659<br>85 | 2 |
| GO:00160<br>52 | carbohydrate catabolic process                         | 0.0160104<br>71 | 0.0217659<br>85 | 2 |
| GO:00510<br>54 | positive regulation of DNA metabolic process           | 0.0160104<br>71 | 0.0217659<br>85 | 2 |
| GO:19018<br>88 | regulation of cell junction assembly                   | 0.0160104<br>71 | 0.0217659<br>85 | 2 |
| GO:19019<br>89 | positive regulation of cell cycle phase transition     | 0.0161675<br>73 | 0.0219465<br>85 | 2 |
| GO:19046<br>59 | glucose transmembrane transport                        | 0.0161675<br>73 | 0.0219465<br>85 | 2 |
| GO:00508<br>67 | positive regulation of cell activation                 | 0.0161906<br>04 | 0.0219613<br>73 | 2 |
| GO:00097<br>46 | response to hexose                                     | 0.0165458<br>35 | 0.0224264<br>07 | 2 |
| GO:00326<br>52 | regulation of interleukin-1 production                 | 0.0165598       | 0.0224285<br>35 | 2 |
| GO:00022<br>51 | organ or tissue specific immune response               | 0.0167019<br>61 | 0.0224697<br>1  | 2 |
| GO:00072<br>12 | dopamine receptor signaling pathway                    | 0.0167019<br>61 | 0.0224697<br>1  | 2 |
| GO:00076<br>18 | mating                                                 | 0.0167019<br>61 | 0.0224697<br>1  | 2 |
| GO:00147<br>42 | positive regulation of muscle hypertrophy              | 0.0167019<br>61 | 0.0224697<br>1  | 2 |
| GO:00308<br>90 | positive regulation of B cell proliferation            | 0.0167019<br>61 | 0.0224697<br>1  | 2 |

|                |                                                    |                 |                 |   |
|----------------|----------------------------------------------------|-----------------|-----------------|---|
| GO:00380<br>83 | peptidyl-tyrosine autophosphorylation              | 0.0167019<br>61 | 0.0224697<br>1  | 2 |
| GO:00425<br>96 | fear response                                      | 0.0167019<br>61 | 0.0224697<br>1  | 2 |
| GO:00468<br>25 | regulation of protein export from nucleus          | 0.0167019<br>61 | 0.0224697<br>1  | 2 |
| GO:20000<br>08 | regulation of protein localization to cell surface | 0.0167019<br>61 | 0.0224697<br>1  | 2 |
| GO:00435<br>88 | skin development                                   | 0.0168838<br>95 | 0.0226975<br>96 | 2 |
| GO:00605<br>41 | respiratory system development                     | 0.0170923<br>32 | 0.0229607<br>46 | 2 |
| GO:00460<br>34 | ATP metabolic process                              | 0.0173365<br>68 | 0.0232643<br>61 | 2 |
| GO:00070<br>09 | plasma membrane organization                       | 0.0173602<br>3  | 0.0232643<br>61 | 2 |
| GO:00358<br>21 | modulation of process of other organism            | 0.0173602<br>3  | 0.0232643<br>61 | 2 |
| GO:00359<br>66 | response to topologically incorrect protein        | 0.0173697<br>76 | 0.0232643<br>61 | 2 |
| GO:00065<br>09 | membrane protein ectodomain proteolysis            | 0.0174826<br>76 | 0.0233292<br>34 | 2 |
| GO:00109<br>07 | positive regulation of glucose metabolic process   | 0.0174826<br>76 | 0.0233292<br>34 | 2 |
| GO:00460<br>06 | regulation of activated T cell proliferation       | 0.0174826<br>76 | 0.0233292<br>34 | 2 |
| GO:00482<br>46 | macrophage chemotaxis                              | 0.0174826<br>76 | 0.0233292<br>34 | 2 |
| GO:00714<br>70 | cellular response to osmotic stress                | 0.0174826<br>76 | 0.0233292<br>34 | 2 |
| GO:00705<br>88 | calcium ion transmembrane transport                | 0.0175536<br>36 | 0.0234066<br>63 | 2 |
| GO:00425<br>94 | response to starvation                             | 0.0176500<br>27 | 0.0235178<br>64 | 2 |
| GO:00086<br>45 | hexose transmembrane transport                     | 0.0177684<br>44 | 0.0236462<br>32 | 2 |
| GO:19035<br>32 | positive regulation of secretion by cell           | 0.0177725<br>03 | 0.0236462<br>32 | 2 |
| GO:00342<br>84 | response to monosaccharide                         | 0.0179330<br>94 | 0.0238423<br>68 | 2 |
| GO:00316<br>23 | receptor internalization                           | 0.0181819<br>97 | 0.0241555<br>4  | 2 |
| GO:00610<br>13 | regulation of mRNA catabolic process               | 0.0182189<br>85 | 0.0241774<br>4  | 2 |

|                |                                                        |                 |                 |   |
|----------------|--------------------------------------------------------|-----------------|-----------------|---|
| GO:00451<br>24 | regulation of bone resorption                          | 0.0182786<br>51 | 0.0241774<br>4  | 2 |
| GO:00457<br>73 | positive regulation of axon extension                  | 0.0182786<br>51 | 0.0241774<br>4  | 2 |
| GO:00903<br>17 | negative regulation of intracellular protein transport | 0.0182786<br>51 | 0.0241774<br>4  | 2 |
| GO:19031<br>46 | regulation of autophagy of mitochondrion               | 0.0182786<br>51 | 0.0241774<br>4  | 2 |
| GO:20006<br>48 | positive regulation of stem cell proliferation         | 0.0182786<br>51 | 0.0241774<br>4  | 2 |
| GO:00157<br>49 | monosaccharide transmembrane transport                 | 0.0186008<br>95 | 0.0245498<br>4  | 2 |
| GO:00469<br>16 | cellular transition metal ion homeostasis              | 0.0186008<br>95 | 0.0245498<br>4  | 2 |
| GO:19038<br>28 | negative regulation of cellular protein localization   | 0.0186008<br>95 | 0.0245498<br>4  | 2 |
| GO:00302<br>82 | bone mineralization                                    | 0.0190251<br>41 | 0.0250549<br>44 | 2 |
| GO:00513<br>41 | regulation of oxidoreductase activity                  | 0.0190251<br>41 | 0.0250549<br>44 | 2 |
| GO:00726<br>76 | lymphocyte migration                                   | 0.0190251<br>41 | 0.0250549<br>44 | 2 |
| GO:00353<br>29 | hippo signaling                                        | 0.0190897<br>24 | 0.0251217<br>12 | 2 |
| GO:00342<br>19 | carbohydrate transmembrane transport                   | 0.0194547<br>4  | 0.0255834<br>59 | 2 |
| GO:19012<br>22 | regulation of NIK/NF-kappaB signaling                  | 0.0198896<br>94 | 0.0260759<br>77 | 2 |
| GO:00108<br>28 | positive regulation of glucose transmembrane transport | 0.0199157<br>36 | 0.0260759<br>77 | 2 |
| GO:00140<br>02 | astrocyte development                                  | 0.0199157<br>36 | 0.0260759<br>77 | 2 |
| GO:00341<br>05 | positive regulation of tissue remodeling               | 0.0199157<br>36 | 0.0260759<br>77 | 2 |
| GO:00431<br>14 | regulation of vascular permeability                    | 0.0199157<br>36 | 0.0260759<br>77 | 2 |
| GO:00903<br>11 | regulation of protein deacetylation                    | 0.0199157<br>36 | 0.0260759<br>77 | 2 |
| GO:00508<br>70 | positive regulation of T cell activation               | 0.0199940<br>45 | 0.0261595<br>79 | 2 |
| GO:00064<br>70 | protein dephosphorylation                              | 0.0200613<br>99 | 0.0262287<br>38 | 2 |
| GO:00512<br>35 | maintenance of location                                | 0.0203004<br>32 | 0.0265220<br>91 | 2 |

|                |                                                      |                 |                 |   |
|----------------|------------------------------------------------------|-----------------|-----------------|---|
| GO:00108<br>63 | positive regulation of phospholipase C activity      | 0.0207565<br>25 | 0.0269871<br>12 | 2 |
| GO:00171<br>44 | drug metabolic process                               | 0.0207565<br>25 | 0.0269871<br>12 | 2 |
| GO:00359<br>87 | endodermal cell differentiation                      | 0.0207565<br>25 | 0.0269871<br>12 | 2 |
| GO:00442<br>75 | cellular carbohydrate catabolic process              | 0.0207565<br>25 | 0.0269871<br>12 | 2 |
| GO:00480<br>66 | developmental pigmentation                           | 0.0207565<br>25 | 0.0269871<br>12 | 2 |
| GO:00507<br>98 | activated T cell proliferation                       | 0.0207565<br>25 | 0.0269871<br>12 | 2 |
| GO:00326<br>12 | interleukin-1 production                             | 0.0207756<br>81 | 0.0269871<br>12 | 2 |
| GO:19005<br>42 | regulation of purine nucleotide metabolic process    | 0.0207756<br>81 | 0.0269871<br>12 | 2 |
| GO:00507<br>92 | regulation of viral process                          | 0.0209202<br>85 | 0.0271554<br>55 | 2 |
| GO:00217<br>82 | glial cell development                               | 0.0212267<br>17 | 0.0274940<br>49 | 2 |
| GO:00427<br>52 | regulation of circadian rhythm                       | 0.0212267<br>17 | 0.0274940<br>49 | 2 |
| GO:00519<br>28 | positive regulation of calcium ion transport         | 0.0212267<br>17 | 0.0274940<br>49 | 2 |
| GO:00305<br>74 | collagen catabolic process                           | 0.0216119<br>35 | 0.0279330<br>19 | 2 |
| GO:00425<br>72 | retinol metabolic process                            | 0.0216119<br>35 | 0.0279330<br>19 | 2 |
| GO:00432<br>68 | positive regulation of potassium ion transport       | 0.0216119<br>35 | 0.0279330<br>19 | 2 |
| GO:00061<br>40 | regulation of nucleotide metabolic process           | 0.0216831<br>18 | 0.0279650<br>98 | 2 |
| GO:00702<br>52 | actin-mediated cell contraction                      | 0.0216831<br>18 | 0.0279650<br>98 | 2 |
| GO:19043<br>75 | regulation of protein localization to cell periphery | 0.0216831<br>18 | 0.0279650<br>98 | 2 |
| GO:00713<br>75 | cellular response to peptide hormone stimulus        | 0.0217739<br>78 | 0.0280622<br>8  | 2 |
| GO:00067<br>21 | terpenoid metabolic process                          | 0.0221448<br>85 | 0.0285199<br>9  | 2 |
| GO:00508<br>63 | regulation of T cell activation                      | 0.0222802<br>72 | 0.0286739<br>45 | 2 |
| GO:00319<br>52 | regulation of protein autophosphorylation            | 0.0224818<br>06 | 0.0288512<br>32 | 2 |

|            |                                                              |             |             |   |
|------------|--------------------------------------------------------------|-------------|-------------|---|
| GO:0045601 | regulation of endothelial cell differentiation               | 0.022481806 | 0.028851232 | 2 |
| GO:0055023 | positive regulation of cardiac muscle tissue growth          | 0.022481806 | 0.028851232 | 2 |
| GO:1900274 | regulation of phospholipase C activity                       | 0.022481806 | 0.028851232 | 2 |
| GO:0034605 | cellular response to heat                                    | 0.022612018 | 0.028977232 | 2 |
| GO:0043500 | muscle adaptation                                            | 0.022612018 | 0.028977232 | 2 |
| GO:0016485 | protein processing                                           | 0.022851083 | 0.029262868 | 2 |
| GO:0006692 | prostanoid metabolic process                                 | 0.023365985 | 0.029753789 | 2 |
| GO:0006693 | prostaglandin metabolic process                              | 0.023365985 | 0.029753789 | 2 |
| GO:0015695 | organic cation transport                                     | 0.023365985 | 0.029753789 | 2 |
| GO:0015872 | dopamine transport                                           | 0.023365985 | 0.029753789 | 2 |
| GO:0031279 | regulation of cyclase activity                               | 0.023365985 | 0.029753789 | 2 |
| GO:0042149 | cellular response to glucose starvation                      | 0.023365985 | 0.029753789 | 2 |
| GO:0045058 | T cell selection                                             | 0.023365985 | 0.029753789 | 2 |
| GO:1900087 | positive regulation of G1/S transition of mitotic cell cycle | 0.023365985 | 0.029753789 | 2 |
| GO:0045732 | positive regulation of protein catabolic process             | 0.023518066 | 0.029926387 | 2 |
| GO:0071621 | granulocyte chemotaxis                                       | 0.023562383 | 0.029961709 | 2 |
| GO:0072089 | stem cell proliferation                                      | 0.024045614 | 0.03055471  | 2 |
| GO:0045646 | regulation of erythrocyte differentiation                    | 0.024264314 | 0.030660361 | 2 |
| GO:0045981 | positive regulation of nucleotide metabolic process          | 0.024264314 | 0.030660361 | 2 |
| GO:0046850 | regulation of bone remodeling                                | 0.024264314 | 0.030660361 | 2 |
| GO:0048546 | digestive tract morphogenesis                                | 0.024264314 | 0.030660361 | 2 |
| GO:0101023 | vascular endothelial cell proliferation                      | 0.024264314 | 0.030660361 | 2 |

|                |                                                            |                 |                 |   |
|----------------|------------------------------------------------------------|-----------------|-----------------|---|
| GO:19005<br>44 | positive regulation of purine nucleotide metabolic process | 0.0242643<br>14 | 0.0306603<br>61 | 2 |
| GO:19035<br>80 | positive regulation of ATP metabolic process               | 0.0242643<br>14 | 0.0306603<br>61 | 2 |
| GO:19055<br>62 | regulation of vascular endothelial cell proliferation      | 0.0242643<br>14 | 0.0306603<br>61 | 2 |
| GO:00510<br>47 | positive regulation of secretion                           | 0.0243820<br>38 | 0.0307876<br>17 | 2 |
| GO:00025<br>76 | platelet degranulation                                     | 0.0245342<br>11 | 0.0309581<br>65 | 2 |
| GO:00434<br>05 | regulation of MAP kinase activity                          | 0.0249268<br>11 | 0.0314316<br>43 | 2 |
| GO:00352<br>72 | exocrine system development                                | 0.0251766<br>41 | 0.0316364<br>37 | 2 |
| GO:00380<br>84 | vascular endothelial growth factor signaling pathway       | 0.0251766<br>41 | 0.0316364<br>37 | 2 |
| GO:00459<br>12 | negative regulation of carbohydrate metabolic process      | 0.0251766<br>41 | 0.0316364<br>37 | 2 |
| GO:00713<br>54 | cellular response to interleukin-6                         | 0.0251766<br>41 | 0.0316364<br>37 | 2 |
| GO:00716<br>75 | regulation of mononuclear cell migration                   | 0.0251766<br>41 | 0.0316364<br>37 | 2 |
| GO:00160<br>42 | lipid catabolic process                                    | 0.0252021<br>21 | 0.0316464<br>78 | 2 |
| GO:00100<br>01 | glial cell differentiation                                 | 0.0252371<br>04 | 0.0316684<br>29 | 2 |
| GO:19033<br>11 | regulation of mRNA metabolic process                       | 0.0254793<br>87 | 0.0319502<br>98 | 2 |
| GO:00067<br>66 | vitamin metabolic process                                  | 0.0255274<br>93 | 0.0319663<br>16 | 2 |
| GO:00441<br>06 | cellular amine metabolic process                           | 0.0255274<br>93 | 0.0319663<br>16 | 2 |
| GO:00439<br>03 | regulation of symbiotic process                            | 0.0255897<br>95 | 0.0320221<br>71 | 2 |
| GO:00102<br>56 | endomembrane system organization                           | 0.0256709<br>46 | 0.0321015<br>21 | 2 |
| GO:00069<br>98 | nuclear envelope organization                              | 0.0261028<br>12 | 0.0325067<br>8  | 2 |
| GO:00108<br>83 | regulation of lipid storage                                | 0.0261028<br>12 | 0.0325067<br>8  | 2 |
| GO:00380<br>66 | p38MAPK cascade                                            | 0.0261028<br>12 | 0.0325067<br>8  | 2 |
| GO:00458<br>39 | negative regulation of mitotic nuclear division            | 0.0261028<br>12 | 0.0325067<br>8  | 2 |

|                |                                                            |                 |                 |   |
|----------------|------------------------------------------------------------|-----------------|-----------------|---|
| GO:00604<br>21 | positive regulation of heart growth                        | 0.0261028<br>12 | 0.0325067<br>8  | 2 |
| GO:00716<br>22 | regulation of granulocyte chemotaxis                       | 0.0261028<br>12 | 0.0325067<br>8  | 2 |
| GO:00097<br>43 | response to carbohydrate                                   | 0.0263040<br>98 | 0.0327349<br>19 | 2 |
| GO:00427<br>42 | defense response to bacterium                              | 0.0266080<br>86 | 0.0330904<br>68 | 2 |
| GO:00431<br>24 | negative regulation of I-kappaB kinase/NF-kappaB signaling | 0.0270426<br>77 | 0.0335617<br>37 | 2 |
| GO:00455<br>99 | negative regulation of fat cell differentiation            | 0.0270426<br>77 | 0.0335617<br>37 | 2 |
| GO:00456<br>61 | regulation of myoblast differentiation                     | 0.0270426<br>77 | 0.0335617<br>37 | 2 |
| GO:00303<br>36 | negative regulation of cell migration                      | 0.0271842<br>74 | 0.0336912<br>53 | 2 |
| GO:00469<br>42 | carboxylic acid transport                                  | 0.0271842<br>74 | 0.0336912<br>53 | 2 |
| GO:00323<br>68 | regulation of lipid transport                              | 0.0275783<br>51 | 0.0341461<br>29 | 2 |
| GO:00482<br>85 | organelle fission                                          | 0.0275890<br>39 | 0.0341461<br>29 | 2 |
| GO:00069<br>68 | cellular defense response                                  | 0.0279960<br>84 | 0.0346025<br>8  | 2 |
| GO:20001<br>79 | positive regulation of neural precursor cell proliferation | 0.0279960<br>84 | 0.0346025<br>8  | 2 |
| GO:00158<br>49 | organic acid transport                                     | 0.0280634<br>45 | 0.0346621<br>61 | 2 |
| GO:00330<br>44 | regulation of chromosome organization                      | 0.0289605<br>74 | 0.0356514<br>13 | 2 |
| GO:00017<br>06 | endoderm formation                                         | 0.0289628<br>84 | 0.0356514<br>13 | 2 |
| GO:00423<br>04 | regulation of fatty acid biosynthetic process              | 0.0289628<br>84 | 0.0356514<br>13 | 2 |
| GO:00514<br>52 | intracellular pH reduction                                 | 0.0289628<br>84 | 0.0356514<br>13 | 2 |
| GO:00707<br>41 | response to interleukin-6                                  | 0.0289628<br>84 | 0.0356514<br>13 | 2 |
| GO:00074<br>09 | axonogenesis                                               | 0.0290886<br>44 | 0.0357818<br>74 | 2 |
| GO:00027<br>05 | positive regulation of leukocyte mediated immunity         | 0.0291726<br>51 | 0.0358364<br>87 | 2 |
| GO:00550<br>76 | transition metal ion homeostasis                           | 0.0291726<br>51 | 0.0358364<br>87 | 2 |

|            |                                                                                   |             |             |   |
|------------|-----------------------------------------------------------------------------------|-------------|-------------|---|
| GO:0035304 | regulation of protein dephosphorylation                                           | 0.02971476  | 0.03647764  | 2 |
| GO:0001755 | neural crest cell migration                                                       | 0.029942929 | 0.036683102 | 2 |
| GO:0086065 | cell communication involved in cardiac conduction                                 | 0.029942929 | 0.036683102 | 2 |
| GO:0090183 | regulation of kidney development                                                  | 0.029942929 | 0.036683102 | 2 |
| GO:0009308 | amine metabolic process                                                           | 0.030262198 | 0.037024105 | 2 |
| GO:0097553 | calcium ion transmembrane import into cytosol                                     | 0.030262198 | 0.037024105 | 2 |
| GO:0043312 | neutrophil degranulation                                                          | 0.030378806 | 0.037141656 | 2 |
| GO:0042593 | glucose homeostasis                                                               | 0.0308415   | 0.037670261 | 2 |
| GO:0019748 | secondary metabolic process                                                       | 0.030936072 | 0.037670261 | 2 |
| GO:0032615 | interleukin-12 production                                                         | 0.030936072 | 0.037670261 | 2 |
| GO:0061178 | regulation of insulin secretion involved in cellular response to glucose stimulus | 0.030936072 | 0.037670261 | 2 |
| GO:0071398 | cellular response to fatty acid                                                   | 0.030936072 | 0.037670261 | 2 |
| GO:1905517 | macrophage migration                                                              | 0.030936072 | 0.037670261 | 2 |
| GO:0002283 | neutrophil activation involved in immune response                                 | 0.031170735 | 0.03793048  | 2 |
| GO:0033500 | carbohydrate homeostasis                                                          | 0.031239206 | 0.037988253 | 2 |
| GO:0031333 | negative regulation of protein-containing complex assembly                        | 0.03137304  | 0.03812538  | 2 |
| GO:0016311 | dephosphorylation                                                                 | 0.031706163 | 0.038504341 | 2 |
| GO:2000146 | negative regulation of cell motility                                              | 0.031760678 | 0.038544676 | 2 |
| GO:0031638 | zymogen activation                                                                | 0.031942166 | 0.038661209 | 2 |
| GO:0045851 | pH reduction                                                                      | 0.031942166 | 0.038661209 | 2 |
| GO:1900408 | negative regulation of cellular response to oxidative stress                      | 0.031942166 | 0.038661209 | 2 |
| GO:1903202 | negative regulation of oxidative stress-induced cell death                        | 0.031942166 | 0.038661209 | 2 |



|                |                                                                |                 |                 |   |
|----------------|----------------------------------------------------------------|-----------------|-----------------|---|
| GO:00067<br>20 | isoprenoid metabolic process                                   | 0.0325051<br>31 | 0.0392900<br>33 | 2 |
| GO:00464<br>34 | organophosphate catabolic process                              | 0.0325051<br>31 | 0.0392900<br>33 | 2 |
| GO:00016<br>58 | branching involved in ureteric bud morphogenesis               | 0.0329610<br>66 | 0.0397085<br>1  | 2 |
| GO:00323<br>87 | negative regulation of intracellular transport                 | 0.0329610<br>66 | 0.0397085<br>1  | 2 |
| GO:00454<br>54 | cell redox homeostasis                                         | 0.0329610<br>66 | 0.0397085<br>1  | 2 |
| GO:00600<br>43 | regulation of cardiac muscle cell proliferation                | 0.0329610<br>66 | 0.0397085<br>1  | 2 |
| GO:00989<br>30 | axonal transport                                               | 0.0329610<br>66 | 0.0397085<br>1  | 2 |
| GO:00226<br>04 | regulation of cell morphogenesis                               | 0.0336276<br>03 | 0.0404845<br>39 | 2 |
| GO:00715<br>60 | cellular response to transforming growth factor beta stimulus  | 0.0336891<br>37 | 0.0405316<br>54 | 2 |
| GO:00108<br>23 | negative regulation of mitochondrion organization              | 0.0339926<br>29 | 0.0407073<br>24 | 2 |
| GO:00325<br>15 | negative regulation of phosphoprotein phosphatase activity     | 0.0339926<br>29 | 0.0407073<br>24 | 2 |
| GO:00487<br>47 | muscle fiber development                                       | 0.0339926<br>29 | 0.0407073<br>24 | 2 |
| GO:00517<br>84 | negative regulation of nuclear division                        | 0.0339926<br>29 | 0.0407073<br>24 | 2 |
| GO:00610<br>98 | positive regulation of protein tyrosine kinase activity        | 0.0339926<br>29 | 0.0407073<br>24 | 2 |
| GO:19028<br>08 | positive regulation of cell cycle G1/S phase transition        | 0.0339926<br>29 | 0.0407073<br>24 | 2 |
| GO:19028<br>83 | negative regulation of response to oxidative stress            | 0.0339926<br>29 | 0.0407073<br>24 | 2 |
| GO:00000<br>86 | G2/M transition of mitotic cell cycle                          | 0.0345301<br>06 | 0.0413236<br>23 | 2 |
| GO:00613<br>37 | cardiac conduction                                             | 0.0348328<br>44 | 0.0416308<br>54 | 2 |
| GO:19036<br>70 | regulation of sprouting angiogenesis                           | 0.0348328<br>44 | 0.0416308<br>54 | 2 |
| GO:00619<br>12 | selective autophagy                                            | 0.0350367<br>11 | 0.0417916<br>98 | 2 |
| GO:00903<br>03 | positive regulation of wound healing                           | 0.0350367<br>11 | 0.0417916<br>98 | 2 |
| GO:19030<br>78 | positive regulation of protein localization to plasma membrane | 0.0350367<br>11 | 0.0417916<br>98 | 2 |

|                |                                                                |                 |                 |   |
|----------------|----------------------------------------------------------------|-----------------|-----------------|---|
| GO:00069<br>59 | humoral immune response                                        | 0.0357511<br>23 | 0.0426157<br>55 | 2 |
| GO:00351<br>48 | tube formation                                                 | 0.0360283<br>45 | 0.0427979<br>31 | 2 |
| GO:00600<br>41 | retina development in camera-type eye                          | 0.0360283<br>45 | 0.0427979<br>31 | 2 |
| GO:00975<br>30 | granulocyte migration                                          | 0.0360283<br>45 | 0.0427979<br>31 | 2 |
| GO:00105<br>18 | positive regulation of phospholipase activity                  | 0.0360931<br>71 | 0.0427979<br>31 | 2 |
| GO:00106<br>76 | positive regulation of cellular carbohydrate metabolic process | 0.0360931<br>71 | 0.0427979<br>31 | 2 |
| GO:00108<br>03 | regulation of tumor necrosis factor-mediated signaling pathway | 0.0360931<br>71 | 0.0427979<br>31 | 2 |
| GO:00488<br>57 | neural nucleus development                                     | 0.0360931<br>71 | 0.0427979<br>31 | 2 |
| GO:00550<br>25 | positive regulation of cardiac muscle tissue development       | 0.0360931<br>71 | 0.0427979<br>31 | 2 |
| GO:00715<br>59 | response to transforming growth factor beta                    | 0.0362486<br>29 | 0.0429260<br>08 | 2 |
| GO:19016<br>17 | organic hydroxy compound biosynthetic process                  | 0.0362486<br>29 | 0.0429260<br>08 | 2 |
| GO:00086<br>43 | carbohydrate transport                                         | 0.0366339<br>78 | 0.0432973<br>35 | 2 |
| GO:00163<br>31 | morphogenesis of embryonic epithelium                          | 0.0366339<br>78 | 0.0432973<br>35 | 2 |
| GO:00508<br>71 | positive regulation of B cell activation                       | 0.0366339<br>78 | 0.0432973<br>35 | 2 |
| GO:00108<br>30 | regulation of myotube differentiation                          | 0.0371618<br>68 | 0.0438353<br>46 | 2 |
| GO:00326<br>13 | interleukin-10 production                                      | 0.0371618<br>68 | 0.0438353<br>46 | 2 |
| GO:00550<br>08 | cardiac muscle tissue morphogenesis                            | 0.0371618<br>68 | 0.0438353<br>46 | 2 |
| GO:00018<br>37 | epithelial to mesenchymal transition                           | 0.0372448<br>55 | 0.0438760<br>32 | 2 |
| GO:19031<br>69 | regulation of calcium ion transmembrane transport              | 0.0372448<br>55 | 0.0438760<br>32 | 2 |
| GO:00162<br>02 | regulation of striated muscle tissue development               | 0.0378609<br>66 | 0.0445438<br>37 | 2 |
| GO:00300<br>48 | actin filament-based movement                                  | 0.0378609<br>66 | 0.0445438<br>37 | 2 |
| GO:00024<br>37 | inflammatory response to antigenic stimulus                    | 0.0382426<br>61 | 0.0449636<br>71 | 2 |

|                |                                                                     |                 |                 |   |
|----------------|---------------------------------------------------------------------|-----------------|-----------------|---|
| GO:00140<br>65 | phosphatidylinositol 3-kinase signaling                             | 0.0384823<br>01 | 0.0452160<br>46 | 2 |
| GO:00434<br>06 | positive regulation of MAP kinase activity                          | 0.0389180<br>65 | 0.0456687<br>51 | 2 |
| GO:00488<br>63 | stem cell differentiation                                           | 0.0389180<br>65 | 0.0456687<br>51 | 2 |
| GO:00066<br>87 | glycosphingolipid metabolic process                                 | 0.0393354<br>13 | 0.0460093<br>05 | 2 |
| GO:00353<br>08 | negative regulation of protein dephosphorylation                    | 0.0393354<br>13 | 0.0460093<br>05 | 2 |
| GO:00357<br>73 | insulin secretion involved in cellular response to glucose stimulus | 0.0393354<br>13 | 0.0460093<br>05 | 2 |
| GO:00606<br>75 | ureteric bud morphogenesis                                          | 0.0393354<br>13 | 0.0460093<br>05 | 2 |
| GO:00985<br>86 | cellular response to virus                                          | 0.0393354<br>13 | 0.0460093<br>05 | 2 |
| GO:19018<br>61 | regulation of muscle tissue development                             | 0.0397406<br>07 | 0.0464532<br>19 | 2 |
| GO:00486<br>34 | regulation of muscle organ development                              | 0.0403775<br>57 | 0.0470882<br>17 | 2 |
| GO:00987<br>39 | import across plasma membrane                                       | 0.0403775<br>57 | 0.0470882<br>17 | 2 |
| GO:19039<br>00 | regulation of viral life cycle                                      | 0.0403775<br>57 | 0.0470882<br>17 | 2 |
| GO:00329<br>22 | circadian regulation of gene expression                             | 0.0404399<br>86 | 0.0470882<br>17 | 2 |
| GO:00343<br>94 | protein localization to cell surface                                | 0.0404399<br>86 | 0.0470882<br>17 | 2 |
| GO:00721<br>71 | mesonephric tubule morphogenesis                                    | 0.0404399<br>86 | 0.0470882<br>17 | 2 |
| GO:00075<br>19 | skeletal muscle tissue development                                  | 0.0410196<br>91 | 0.0477325<br>09 | 2 |
| GO:00025<br>48 | monocyte chemotaxis                                                 | 0.0415562<br>42 | 0.0482018<br>76 | 2 |
| GO:00451<br>23 | cellular extravasation                                              | 0.0415562<br>42 | 0.0482018<br>76 | 2 |
| GO:00456<br>70 | regulation of osteoclast differentiation                            | 0.0415562<br>42 | 0.0482018<br>76 | 2 |
| GO:00465<br>13 | ceramide biosynthetic process                                       | 0.0415562<br>42 | 0.0482018<br>76 | 2 |
| GO:00726<br>78 | T cell migration                                                    | 0.0415562<br>42 | 0.0482018<br>76 | 2 |
| GO:00510<br>92 | positive regulation of NF-kappaB transcription factor activity      | 0.0416669<br>98 | 0.0482684<br>62 | 2 |

|                |                                                                 |                 |                 |   |
|----------------|-----------------------------------------------------------------|-----------------|-----------------|---|
| GO:00550<br>67 | monovalent inorganic cation homeostasis                         | 0.0416669<br>98 | 0.0482684<br>62 | 2 |
| GO:00302<br>58 | lipid modification                                              | 0.0421716<br>7  | 0.0488218<br>35 | 2 |
| GO:00026<br>37 | regulation of immunoglobulin production                         | 0.0426840<br>46 | 0.0492888<br>7  | 2 |
| GO:00027<br>53 | cytoplasmic pattern recognition receptor signaling pathway      | 0.0426840<br>46 | 0.0492888<br>7  | 2 |
| GO:00507<br>66 | positive regulation of phagocytosis                             | 0.0426840<br>46 | 0.0492888<br>7  | 2 |
| GO:19043<br>77 | positive regulation of protein localization to cell periphery   | 0.0426840<br>46 | 0.0492888<br>7  | 2 |
| GO:00400<br>13 | negative regulation of locomotion                               | 0.0430663<br>14 | 0.0496985<br>73 | 2 |
| GO:19033<br>05 | regulation of regulated secretory pathway                       | 0.0436398<br>48 | 0.0503283<br>34 | 2 |
| GO:00486<br>62 | negative regulation of smooth muscle cell proliferation         | 0.0438232<br>65 | 0.0505076<br>71 | 2 |
| GO:00512<br>71 | negative regulation of cellular component movement              | 0.0442360<br>91 | 0.0509039<br>23 | 2 |
| GO:00066<br>65 | sphingolipid metabolic process                                  | 0.0443077<br>34 | 0.0509039<br>23 | 2 |
| GO:00070<br>88 | regulation of mitotic nuclear division                          | 0.0443077<br>34 | 0.0509039<br>23 | 2 |
| GO:00312<br>14 | biomineral tissue development                                   | 0.0443077<br>34 | 0.0509039<br>23 | 2 |
| GO:01101<br>48 | biomineralization                                               | 0.0443077<br>34 | 0.0509039<br>23 | 2 |
| GO:00080<br>88 | axo-dendritic transport                                         | 0.0449737<br>63 | 0.0515788<br>71 | 2 |
| GO:00323<br>70 | positive regulation of lipid transport                          | 0.0449737<br>63 | 0.0515788<br>71 | 2 |
| GO:00072<br>59 | receptor signaling pathway via JAK-STAT                         | 0.0449807<br>36 | 0.0515788<br>71 | 2 |
| GO:00148<br>23 | response to activity                                            | 0.0461354<br>08 | 0.0528359<br>54 | 2 |
| GO:00425<br>31 | positive regulation of tyrosine phosphorylation of STAT protein | 0.0461354<br>08 | 0.0528359<br>54 | 2 |
| GO:19035<br>31 | negative regulation of secretion by cell                        | 0.0463420<br>36 | 0.0528974<br>92 | 2 |
| GO:00421<br>29 | regulation of T cell proliferation                              | 0.0470303<br>09 | 0.0528974<br>92 | 2 |
| GO:00026<br>76 | regulation of chronic inflammatory response                     | 0.0472123<br>19 | 0.0528974<br>92 | 2 |

|                |                                                                                    |                 |                 |   |
|----------------|------------------------------------------------------------------------------------|-----------------|-----------------|---|
| GO:00029<br>34 | desmosome organization                                                             | 0.0472123<br>19 | 0.0528974<br>92 | 2 |
| GO:00102<br>69 | response to selenium ion                                                           | 0.0472123<br>19 | 0.0528974<br>92 | 2 |
| GO:00107<br>49 | regulation of nitric oxide mediated signal transduction                            | 0.0472123<br>19 | 0.0528974<br>92 | 2 |
| GO:00140<br>41 | regulation of neuron maturation                                                    | 0.0472123<br>19 | 0.0528974<br>92 | 2 |
| GO:00148<br>77 | response to muscle inactivity involved in regulation of muscle adaptation          | 0.0472123<br>19 | 0.0528974<br>92 | 2 |
| GO:00148<br>94 | response to denervation involved in regulation of muscle adaptation                | 0.0472123<br>19 | 0.0528974<br>92 | 2 |
| GO:00215<br>48 | pons development                                                                   | 0.0472123<br>19 | 0.0528974<br>92 | 2 |
| GO:00219<br>36 | regulation of cerebellar granule cell precursor proliferation                      | 0.0472123<br>19 | 0.0528974<br>92 | 2 |
| GO:00425<br>41 | hemoglobin biosynthetic process                                                    | 0.0472123<br>19 | 0.0528974<br>92 | 2 |
| GO:00457<br>92 | negative regulation of cell size                                                   | 0.0472123<br>19 | 0.0528974<br>92 | 2 |
| GO:00487<br>39 | cardiac muscle fiber development                                                   | 0.0472123<br>19 | 0.0528974<br>92 | 2 |
| GO:00513<br>42 | regulation of cyclic-nucleotide phosphodiesterase activity                         | 0.0472123<br>19 | 0.0528974<br>92 | 2 |
| GO:00515<br>41 | elastin metabolic process                                                          | 0.0472123<br>19 | 0.0528974<br>92 | 2 |
| GO:00605<br>13 | prostatic bud formation                                                            | 0.0472123<br>19 | 0.0528974<br>92 | 2 |
| GO:00607<br>68 | regulation of epithelial cell proliferation involved in prostate gland development | 0.0472123<br>19 | 0.0528974<br>92 | 2 |
| GO:00700<br>91 | glucagon secretion                                                                 | 0.0472123<br>19 | 0.0528974<br>92 | 2 |
| GO:00700<br>92 | regulation of glucagon secretion                                                   | 0.0472123<br>19 | 0.0528974<br>92 | 2 |
| GO:00700<br>99 | regulation of chemokine-mediated signaling pathway                                 | 0.0472123<br>19 | 0.0528974<br>92 | 2 |
| GO:00713<br>94 | cellular response to testosterone stimulus                                         | 0.0472123<br>19 | 0.0528974<br>92 | 2 |
| GO:00860<br>70 | SA node cell to atrial cardiac muscle cell communication                           | 0.0472123<br>19 | 0.0528974<br>92 | 2 |
| GO:00970<br>50 | type B pancreatic cell apoptotic process                                           | 0.0472123<br>19 | 0.0528974<br>92 | 2 |
| GO:19002<br>22 | negative regulation of amyloid-beta clearance                                      | 0.0472123<br>19 | 0.0528974<br>92 | 2 |

|                |                                                                |                 |                 |   |
|----------------|----------------------------------------------------------------|-----------------|-----------------|---|
| GO:19017<br>25 | regulation of histone deacetylase activity                     | 0.0472123<br>19 | 0.0528974<br>92 | 2 |
| GO:19034<br>31 | positive regulation of cell maturation                         | 0.0472123<br>19 | 0.0528974<br>92 | 2 |
| GO:19038<br>62 | positive regulation of oxidative phosphorylation               | 0.0472123<br>19 | 0.0528974<br>92 | 2 |
| GO:19043<br>38 | regulation of dopaminergic neuron differentiation              | 0.0472123<br>19 | 0.0528974<br>92 | 2 |
| GO:19045<br>26 | regulation of microtubule binding                              | 0.0472123<br>19 | 0.0528974<br>92 | 2 |
| GO:19047<br>79 | regulation of protein localization to centrosome               | 0.0472123<br>19 | 0.0528974<br>92 | 2 |
| GO:20000<br>48 | negative regulation of cell-cell adhesion mediated by cadherin | 0.0472123<br>19 | 0.0528974<br>92 | 2 |
| GO:20004<br>25 | regulation of apoptotic cell clearance                         | 0.0472123<br>19 | 0.0528974<br>92 | 2 |
| GO:20006<br>59 | regulation of interleukin-1-mediated signaling pathway         | 0.0472123<br>19 | 0.0528974<br>92 | 2 |
| GO:20010<br>54 | negative regulation of mesenchymal cell apoptotic process      | 0.0472123<br>19 | 0.0528974<br>92 | 2 |
| GO:00506<br>63 | cytokine secretion                                             | 0.0473080<br>69 | 0.0529064<br>93 | 2 |
| GO:00709<br>88 | demethylation                                                  | 0.0473080<br>69 | 0.0529064<br>93 | 2 |
| GO:19044<br>27 | positive regulation of calcium ion transmembrane transport     | 0.0473080<br>69 | 0.0529064<br>93 | 2 |
| GO:00605<br>38 | skeletal muscle organ development                              | 0.0477236<br>46 | 0.0533382<br>83 | 2 |
| GO:00032<br>08 | cardiac ventricle morphogenesis                                | 0.0484916<br>15 | 0.0539964<br>93 | 2 |
| GO:00105<br>17 | regulation of phospholipase activity                           | 0.0484916<br>15 | 0.0539964<br>93 | 2 |
| GO:00106<br>11 | regulation of cardiac muscle hypertrophy                       | 0.0484916<br>15 | 0.0539964<br>93 | 2 |
| GO:00511<br>45 | smooth muscle cell differentiation                             | 0.0484916<br>15 | 0.0539964<br>93 | 2 |
| GO:00511<br>55 | positive regulation of striated muscle cell differentiation    | 0.0484916<br>15 | 0.0539964<br>93 | 2 |
| GO:00720<br>78 | nephron tubule morphogenesis                                   | 0.0484916<br>15 | 0.0539964<br>93 | 2 |
| GO:00326<br>35 | interleukin-6 production                                       | 0.0491254<br>59 | 0.0546686<br>5  | 2 |
| GO:00514<br>03 | stress-activated MAPK cascade                                  | 0.0496488<br>8  | 0.0551832<br>56 | 2 |

|                |                                                                          |                 |                 |   |
|----------------|--------------------------------------------------------------------------|-----------------|-----------------|---|
| GO:01400<br>14 | mitotic nuclear division                                                 | 0.0496488<br>8  | 0.0551832<br>56 | 2 |
| GO:19030<br>36 | positive regulation of response to wounding                              | 0.0496859<br>16 | 0.0551905<br>2  | 2 |
| GO:00022<br>44 | hematopoietic progenitor cell differentiation                            | 0.0505473<br>67 | 0.0553422<br>51 | 2 |
| GO:00331<br>43 | regulation of intracellular steroid hormone receptor signaling pathway   | 0.0508908<br>44 | 0.0553422<br>51 | 2 |
| GO:00456<br>85 | regulation of glial cell differentiation                                 | 0.0508908<br>44 | 0.0553422<br>51 | 2 |
| GO:00720<br>88 | nephron epithelium morphogenesis                                         | 0.0508908<br>44 | 0.0553422<br>51 | 2 |
| GO:19019<br>83 | regulation of protein acetylation                                        | 0.0508908<br>44 | 0.0553422<br>51 | 2 |
| GO:00065<br>27 | arginine catabolic process                                               | 0.0518105<br>2  | 0.0553422<br>51 | 2 |
| GO:00070<br>28 | cytoplasm organization                                                   | 0.0518105<br>2  | 0.0553422<br>51 | 2 |
| GO:00071<br>91 | adenylate cyclase-activating dopamine receptor signaling pathway         | 0.0518105<br>2  | 0.0553422<br>51 | 2 |
| GO:00086<br>11 | ether lipid biosynthetic process                                         | 0.0518105<br>2  | 0.0553422<br>51 | 2 |
| GO:00107<br>39 | positive regulation of protein kinase A signaling                        | 0.0518105<br>2  | 0.0553422<br>51 | 2 |
| GO:00109<br>18 | positive regulation of mitochondrial membrane potential                  | 0.0518105<br>2  | 0.0553422<br>51 | 2 |
| GO:00148<br>70 | response to muscle inactivity                                            | 0.0518105<br>2  | 0.0553422<br>51 | 2 |
| GO:00170<br>85 | response to insecticide                                                  | 0.0518105<br>2  | 0.0553422<br>51 | 2 |
| GO:00184<br>01 | peptidyl-proline hydroxylation to 4-hydroxy-L-proline                    | 0.0518105<br>2  | 0.0553422<br>51 | 2 |
| GO:00312<br>84 | positive regulation of guanylate cyclase activity                        | 0.0518105<br>2  | 0.0553422<br>51 | 2 |
| GO:00314<br>42 | positive regulation of mRNA 3'-end processing                            | 0.0518105<br>2  | 0.0553422<br>51 | 2 |
| GO:00319<br>15 | positive regulation of synaptic plasticity                               | 0.0518105<br>2  | 0.0553422<br>51 | 2 |
| GO:00322<br>53 | dense core granule localization                                          | 0.0518105<br>2  | 0.0553422<br>51 | 2 |
| GO:00331<br>48 | positive regulation of intracellular estrogen receptor signaling pathway | 0.0518105<br>2  | 0.0553422<br>51 | 2 |
| GO:00331<br>97 | response to vitamin E                                                    | 0.0518105<br>2  | 0.0553422<br>51 | 2 |

|                |                                                                                             |                |                 |   |
|----------------|---------------------------------------------------------------------------------------------|----------------|-----------------|---|
| GO:00353<br>31 | negative regulation of hippo signaling                                                      | 0.0518105<br>2 | 0.0553422<br>51 | 2 |
| GO:00357<br>47 | natural killer cell chemotaxis                                                              | 0.0518105<br>2 | 0.0553422<br>51 | 2 |
| GO:00434<br>71 | regulation of cellular carbohydrate catabolic process                                       | 0.0518105<br>2 | 0.0553422<br>51 | 2 |
| GO:00436<br>19 | regulation of transcription from RNA polymerase II promoter in response to oxidative stress | 0.0518105<br>2 | 0.0553422<br>51 | 2 |
| GO:00456<br>57 | positive regulation of monocyte differentiation                                             | 0.0518105<br>2 | 0.0553422<br>51 | 2 |
| GO:00459<br>45 | positive regulation of transcription by RNA polymerase III                                  | 0.0518105<br>2 | 0.0553422<br>51 | 2 |
| GO:00465<br>04 | glycerol ether biosynthetic process                                                         | 0.0518105<br>2 | 0.0553422<br>51 | 2 |
| GO:00487<br>42 | regulation of skeletal muscle fiber development                                             | 0.0518105<br>2 | 0.0553422<br>51 | 2 |
| GO:00488<br>75 | chemical homeostasis within a tissue                                                        | 0.0518105<br>2 | 0.0553422<br>51 | 2 |
| GO:00510<br>24 | positive regulation of immunoglobulin secretion                                             | 0.0518105<br>2 | 0.0553422<br>51 | 2 |
| GO:00516<br>10 | serotonin uptake                                                                            | 0.0518105<br>2 | 0.0553422<br>51 | 2 |
| GO:00517<br>12 | positive regulation of killing of cells of other organism                                   | 0.0518105<br>2 | 0.0553422<br>51 | 2 |
| GO:00519<br>74 | negative regulation of telomerase activity                                                  | 0.0518105<br>2 | 0.0553422<br>51 | 2 |
| GO:00602<br>81 | regulation of oocyte development                                                            | 0.0518105<br>2 | 0.0553422<br>51 | 2 |
| GO:00603<br>54 | negative regulation of cell adhesion molecule production                                    | 0.0518105<br>2 | 0.0553422<br>51 | 2 |
| GO:00607<br>67 | epithelial cell proliferation involved in prostate gland development                        | 0.0518105<br>2 | 0.0553422<br>51 | 2 |
| GO:00609<br>47 | cardiac vascular smooth muscle cell differentiation                                         | 0.0518105<br>2 | 0.0553422<br>51 | 2 |
| GO:00706<br>73 | response to interleukin-18                                                                  | 0.0518105<br>2 | 0.0553422<br>51 | 2 |
| GO:00712<br>81 | cellular response to iron ion                                                               | 0.0518105<br>2 | 0.0553422<br>51 | 2 |
| GO:00718<br>03 | positive regulation of podosome assembly                                                    | 0.0518105<br>2 | 0.0553422<br>51 | 2 |
| GO:00860<br>16 | AV node cell action potential                                                               | 0.0518105<br>2 | 0.0553422<br>51 | 2 |
| GO:00860<br>27 | AV node cell to bundle of His cell signaling                                                | 0.0518105<br>2 | 0.0553422<br>51 | 2 |



|                |                                                                                                                  |                |                 |   |
|----------------|------------------------------------------------------------------------------------------------------------------|----------------|-----------------|---|
| GO:00902<br>69 | fibroblast growth factor production                                                                              | 0.0518105<br>2 | 0.0553422<br>51 | 2 |
| GO:00902<br>70 | regulation of fibroblast growth factor production                                                                | 0.0518105<br>2 | 0.0553422<br>51 | 2 |
| GO:00905<br>57 | establishment of endothelial intestinal barrier                                                                  | 0.0518105<br>2 | 0.0553422<br>51 | 2 |
| GO:00973<br>84 | cellular lipid biosynthetic process                                                                              | 0.0518105<br>2 | 0.0553422<br>51 | 2 |
| GO:00995<br>19 | dense core granule cytoskeletal transport                                                                        | 0.0518105<br>2 | 0.0553422<br>51 | 2 |
| GO:00996<br>24 | atrial cardiac muscle cell membrane repolarization                                                               | 0.0518105<br>2 | 0.0553422<br>51 | 2 |
| GO:01060<br>49 | regulation of cellular response to osmotic stress                                                                | 0.0518105<br>2 | 0.0553422<br>51 | 2 |
| GO:01060<br>72 | negative regulation of adenylate cyclase-activating G protein-coupled receptor signaling pathway                 | 0.0518105<br>2 | 0.0553422<br>51 | 2 |
| GO:01400<br>52 | cellular response to oxidised low-density lipoprotein particle stimulus                                          | 0.0518105<br>2 | 0.0553422<br>51 | 2 |
| GO:19010<br>33 | positive regulation of response to reactive oxygen species                                                       | 0.0518105<br>2 | 0.0553422<br>51 | 2 |
| GO:19019<br>50 | dense core granule transport                                                                                     | 0.0518105<br>2 | 0.0553422<br>51 | 2 |
| GO:19025<br>13 | regulation of organelle transport along microtubule                                                              | 0.0518105<br>2 | 0.0553422<br>51 | 2 |
| GO:19043<br>21 | response to forskolin                                                                                            | 0.0518105<br>2 | 0.0553422<br>51 | 2 |
| GO:19043<br>22 | cellular response to forskolin                                                                                   | 0.0518105<br>2 | 0.0553422<br>51 | 2 |
| GO:19058<br>79 | regulation of oogenesis                                                                                          | 0.0518105<br>2 | 0.0553422<br>51 | 2 |
| GO:19904<br>40 | positive regulation of transcription from RNA polymerase II promoter in response to endoplasmic reticulum stress | 0.0518105<br>2 | 0.0553422<br>51 | 2 |
| GO:20004<br>80 | negative regulation of cAMP-dependent protein kinase activity                                                    | 0.0518105<br>2 | 0.0553422<br>51 | 2 |
| GO:20005<br>51 | regulation of T-helper 2 cell cytokine production                                                                | 0.0518105<br>2 | 0.0553422<br>51 | 2 |
| GO:20005<br>74 | regulation of microtubule motor activity                                                                         | 0.0518105<br>2 | 0.0553422<br>51 | 2 |
| GO:20006<br>15 | regulation of histone H3-K9 acetylation                                                                          | 0.0518105<br>2 | 0.0553422<br>51 | 2 |
| GO:20006<br>28 | regulation of miRNA metabolic process                                                                            | 0.0518105<br>2 | 0.0553422<br>51 | 2 |
| GO:20011<br>38 | regulation of phospholipid transport                                                                             | 0.0518105<br>2 | 0.0553422<br>51 | 2 |

|                |                                                               |                 |                 |   |
|----------------|---------------------------------------------------------------|-----------------|-----------------|---|
| GO:20011<br>40 | positive regulation of phospholipid transport                 | 0.0518105<br>2  | 0.0553422<br>51 | 2 |
| GO:00510<br>99 | positive regulation of binding                                | 0.0519892<br>57 | 0.0553965<br>48 | 2 |
| GO:00976<br>96 | receptor signaling pathway via STAT                           | 0.0519892<br>57 | 0.0553965<br>48 | 2 |
| GO:00083<br>06 | associative learning                                          | 0.0521062<br>7  | 0.0553965<br>48 | 2 |
| GO:00147<br>43 | regulation of muscle hypertrophy                              | 0.0521062<br>7  | 0.0553965<br>48 | 2 |
| GO:00330<br>77 | T cell differentiation in thymus                              | 0.0521062<br>7  | 0.0553965<br>48 | 2 |
| GO:00601<br>93 | positive regulation of lipase activity                        | 0.0521062<br>7  | 0.0553965<br>48 | 2 |
| GO:00604<br>15 | muscle tissue morphogenesis                                   | 0.0521062<br>7  | 0.0553965<br>48 | 2 |
| GO:00712<br>29 | cellular response to acid chemical                            | 0.0521062<br>7  | 0.0553965<br>48 | 2 |
| GO:00506<br>80 | negative regulation of epithelial cell proliferation          | 0.0527176<br>59 | 0.0560136<br>33 | 2 |
| GO:00074<br>22 | peripheral nervous system development                         | 0.0533320<br>68 | 0.0564675<br>1  | 2 |
| GO:00305<br>00 | regulation of bone mineralization                             | 0.0533320<br>68 | 0.0564675<br>1  | 2 |
| GO:00324<br>13 | negative regulation of ion transmembrane transporter activity | 0.0533320<br>68 | 0.0564675<br>1  | 2 |
| GO:00604<br>11 | cardiac septum morphogenesis                                  | 0.0533320<br>68 | 0.0564675<br>1  | 2 |
| GO:00613<br>33 | renal tubule morphogenesis                                    | 0.0533320<br>68 | 0.0564675<br>1  | 2 |
| GO:00720<br>28 | nephron morphogenesis                                         | 0.0533320<br>68 | 0.0564675<br>1  | 2 |
| GO:00516<br>04 | protein maturation                                            | 0.0533733<br>9  | 0.0564782<br>13 | 2 |
| GO:00603<br>95 | SMAD protein signal transduction                              | 0.0545681<br>13 | 0.0577086<br>87 | 2 |
| GO:00004<br>22 | autophagy of mitochondrion                                    | 0.0558142<br>79 | 0.0582697<br>78 | 2 |
| GO:00064<br>46 | regulation of translational initiation                        | 0.0558142<br>79 | 0.0582697<br>78 | 2 |
| GO:00074<br>92 | endoderm development                                          | 0.0558142<br>79 | 0.0582697<br>78 | 2 |
| GO:00165<br>75 | histone deacetylation                                         | 0.0558142<br>79 | 0.0582697<br>78 | 2 |

|                |                                                                                   |                 |                 |   |
|----------------|-----------------------------------------------------------------------------------|-----------------|-----------------|---|
| GO:00322<br>72 | negative regulation of protein polymerization                                     | 0.0558142<br>79 | 0.0582697<br>78 | 2 |
| GO:00434<br>62 | regulation of ATPase activity                                                     | 0.0558142<br>79 | 0.0582697<br>78 | 2 |
| GO:00617<br>26 | mitochondrion disassembly                                                         | 0.0558142<br>79 | 0.0582697<br>78 | 2 |
| GO:00002<br>80 | nuclear division                                                                  | 0.0560758<br>66 | 0.0582697<br>78 | 2 |
| GO:00001<br>85 | activation of MAPKKK activity                                                     | 0.0563867<br>73 | 0.0582697<br>78 | 2 |
| GO:00019<br>76 | nervous system process involved in regulation of systemic arterial blood pressure | 0.0563867<br>73 | 0.0582697<br>78 | 2 |
| GO:00025<br>51 | mast cell chemotaxis                                                              | 0.0563867<br>73 | 0.0582697<br>78 | 2 |
| GO:00028<br>63 | positive regulation of inflammatory response to antigenic stimulus                | 0.0563867<br>73 | 0.0582697<br>78 | 2 |
| GO:00029<br>23 | regulation of humoral immune response mediated by circulating immunoglobulin      | 0.0563867<br>73 | 0.0582697<br>78 | 2 |
| GO:00033<br>34 | keratinocyte development                                                          | 0.0563867<br>73 | 0.0582697<br>78 | 2 |
| GO:00060<br>69 | ethanol oxidation                                                                 | 0.0563867<br>73 | 0.0582697<br>78 | 2 |
| GO:00073<br>20 | insemination                                                                      | 0.0563867<br>73 | 0.0582697<br>78 | 2 |
| GO:00148<br>31 | gastro-intestinal system smooth muscle contraction                                | 0.0563867<br>73 | 0.0582697<br>78 | 2 |
| GO:00313<br>92 | regulation of prostaglandin biosynthetic process                                  | 0.0563867<br>73 | 0.0582697<br>78 | 2 |
| GO:00332<br>34 | negative regulation of protein sumoylation                                        | 0.0563867<br>73 | 0.0582697<br>78 | 2 |
| GO:00354<br>04 | histone-serine phosphorylation                                                    | 0.0563867<br>73 | 0.0582697<br>78 | 2 |
| GO:00364<br>62 | TRAIL-activated apoptotic signaling pathway                                       | 0.0563867<br>73 | 0.0582697<br>78 | 2 |
| GO:00380<br>03 | opioid receptor signaling pathway                                                 | 0.0563867<br>73 | 0.0582697<br>78 | 2 |
| GO:00423<br>68 | vitamin D biosynthetic process                                                    | 0.0563867<br>73 | 0.0582697<br>78 | 2 |
| GO:00424<br>16 | dopamine biosynthetic process                                                     | 0.0563867<br>73 | 0.0582697<br>78 | 2 |
| GO:00463<br>22 | negative regulation of fatty acid oxidation                                       | 0.0563867<br>73 | 0.0582697<br>78 | 2 |
| GO:00510<br>95 | regulation of helicase activity                                                   | 0.0563867<br>73 | 0.0582697<br>78 | 2 |

|                |                                                                                            |                 |                 |   |
|----------------|--------------------------------------------------------------------------------------------|-----------------|-----------------|---|
| GO:00515<br>49 | positive regulation of keratinocyte migration                                              | 0.0563867<br>73 | 0.0582697<br>78 | 2 |
| GO:00517<br>98 | positive regulation of hair follicle development                                           | 0.0563867<br>73 | 0.0582697<br>78 | 2 |
| GO:00550<br>15 | ventricular cardiac muscle cell development                                                | 0.0563867<br>73 | 0.0582697<br>78 | 2 |
| GO:00604<br>53 | regulation of gastric acid secretion                                                       | 0.0563867<br>73 | 0.0582697<br>78 | 2 |
| GO:00716<br>79 | commissural neuron axon guidance                                                           | 0.0563867<br>73 | 0.0582697<br>78 | 2 |
| GO:00725<br>20 | seminiferous tubule development                                                            | 0.0563867<br>73 | 0.0582697<br>78 | 2 |
| GO:00725<br>40 | T-helper 17 cell lineage commitment                                                        | 0.0563867<br>73 | 0.0582697<br>78 | 2 |
| GO:00860<br>67 | AV node cell to bundle of His cell communication                                           | 0.0563867<br>73 | 0.0582697<br>78 | 2 |
| GO:00972<br>01 | negative regulation of transcription from RNA polymerase II promoter in response to stress | 0.0563867<br>73 | 0.0582697<br>78 | 2 |
| GO:01500<br>65 | regulation of deacetylase activity                                                         | 0.0563867<br>73 | 0.0582697<br>78 | 2 |
| GO:19015<br>03 | ether biosynthetic process                                                                 | 0.0563867<br>73 | 0.0582697<br>78 | 2 |
| GO:19023<br>37 | regulation of apoptotic process involved in morphogenesis                                  | 0.0563867<br>73 | 0.0582697<br>78 | 2 |
| GO:20010<br>53 | regulation of mesenchymal cell apoptotic process                                           | 0.0563867<br>73 | 0.0582697<br>78 | 2 |
| GO:20012<br>14 | positive regulation of vasculogenesis                                                      | 0.0563867<br>73 | 0.0582697<br>78 | 2 |
| GO:00061<br>10 | regulation of glycolytic process                                                           | 0.0570704<br>42 | 0.0588418<br>59 | 2 |
| GO:00140<br>32 | neural crest cell development                                                              | 0.0570704<br>42 | 0.0588418<br>59 | 2 |
| GO:00550<br>21 | regulation of cardiac muscle tissue growth                                                 | 0.0570704<br>42 | 0.0588418<br>59 | 2 |
| GO:20003<br>00 | regulation of synaptic vesicle exocytosis                                                  | 0.0570704<br>42 | 0.0588418<br>59 | 2 |
| GO:00310<br>98 | stress-activated protein kinase signaling cascade                                          | 0.0572467<br>08 | 0.0589899<br>84 | 2 |
| GO:20012<br>52 | positive regulation of chromosome organization                                             | 0.0579542<br>69 | 0.0596851<br>03 | 2 |
| GO:00019<br>37 | negative regulation of endothelial cell proliferation                                      | 0.0583364<br>79 | 0.0599422<br>62 | 2 |
| GO:00199<br>15 | lipid storage                                                                              | 0.0583364<br>79 | 0.0599422<br>62 | 2 |

|                |                                                                                  |                 |                 |   |
|----------------|----------------------------------------------------------------------------------|-----------------|-----------------|---|
| GO:00332<br>38 | regulation of cellular amine metabolic process                                   | 0.0583364<br>79 | 0.0599422<br>62 | 2 |
| GO:00508<br>29 | defense response to Gram-negative bacterium                                      | 0.0583364<br>79 | 0.0599422<br>62 | 2 |
| GO:00066<br>11 | protein export from nucleus                                                      | 0.0594942<br>65 | 0.0609908<br>53 | 2 |
| GO:19029<br>30 | regulation of alcohol biosynthetic process                                       | 0.0596122<br>69 | 0.0609908<br>53 | 2 |
| GO:00015<br>70 | vasculogenesis                                                                   | 0.0608976<br>9  | 0.0609908<br>53 | 2 |
| GO:00027<br>18 | regulation of cytokine production involved in immune response                    | 0.0608976<br>9  | 0.0609908<br>53 | 2 |
| GO:00486<br>44 | muscle organ morphogenesis                                                       | 0.0608976<br>9  | 0.0609908<br>53 | 2 |
| GO:00487<br>08 | astrocyte differentiation                                                        | 0.0608976<br>9  | 0.0609908<br>53 | 2 |
| GO:00007<br>22 | telomere maintenance via recombination                                           | 0.0609411<br>81 | 0.0609908<br>53 | 2 |
| GO:00026<br>79 | respiratory burst involved in defense response                                   | 0.0609411<br>81 | 0.0609908<br>53 | 2 |
| GO:00030<br>84 | positive regulation of systemic arterial blood pressure                          | 0.0609411<br>81 | 0.0609908<br>53 | 2 |
| GO:00066<br>84 | sphingomyelin metabolic process                                                  | 0.0609411<br>81 | 0.0609908<br>53 | 2 |
| GO:00071<br>71 | activation of transmembrane receptor protein tyrosine kinase activity            | 0.0609411<br>81 | 0.0609908<br>53 | 2 |
| GO:00098<br>86 | post-embryonic animal morphogenesis                                              | 0.0609411<br>81 | 0.0609908<br>53 | 2 |
| GO:00104<br>59 | negative regulation of heart rate                                                | 0.0609411<br>81 | 0.0609908<br>53 | 2 |
| GO:00106<br>42 | negative regulation of platelet-derived growth factor receptor signaling pathway | 0.0609411<br>81 | 0.0609908<br>53 | 2 |
| GO:00108<br>70 | positive regulation of receptor biosynthetic process                             | 0.0609411<br>81 | 0.0609908<br>53 | 2 |
| GO:00196<br>27 | urea metabolic process                                                           | 0.0609411<br>81 | 0.0609908<br>53 | 2 |
| GO:00219<br>84 | adenohypophysis development                                                      | 0.0609411<br>81 | 0.0609908<br>53 | 2 |
| GO:00300<br>02 | cellular anion homeostasis                                                       | 0.0609411<br>81 | 0.0609908<br>53 | 2 |
| GO:00303<br>20 | cellular monovalent inorganic anion homeostasis                                  | 0.0609411<br>81 | 0.0609908<br>53 | 2 |
| GO:00306<br>56 | regulation of vitamin metabolic process                                          | 0.0609411<br>81 | 0.0609908<br>53 | 2 |

|                |                                                                                 |                 |                 |   |
|----------------|---------------------------------------------------------------------------------|-----------------|-----------------|---|
| GO:00310<br>53 | primary miRNA processing                                                        | 0.0609411<br>81 | 0.0609908<br>53 | 2 |
| GO:00311<br>15 | negative regulation of microtubule polymerization                               | 0.0609411<br>81 | 0.0609908<br>53 | 2 |
| GO:00319<br>53 | negative regulation of protein autophosphorylation                              | 0.0609411<br>81 | 0.0609908<br>53 | 2 |
| GO:00322<br>30 | positive regulation of synaptic transmission, GABAergic                         | 0.0609411<br>81 | 0.0609908<br>53 | 2 |
| GO:00323<br>52 | positive regulation of hormone metabolic process                                | 0.0609411<br>81 | 0.0609908<br>53 | 2 |
| GO:00331<br>27 | regulation of histone phosphorylation                                           | 0.0609411<br>81 | 0.0609908<br>53 | 2 |
| GO:00331<br>45 | positive regulation of intracellular steroid hormone receptor signaling pathway | 0.0609411<br>81 | 0.0609908<br>53 | 2 |
| GO:00426<br>35 | positive regulation of hair cycle                                               | 0.0609411<br>81 | 0.0609908<br>53 | 2 |
| GO:00435<br>68 | positive regulation of insulin-like growth factor receptor signaling pathway    | 0.0609411<br>81 | 0.0609908<br>53 | 2 |
| GO:00439<br>70 | histone H3-K9 acetylation                                                       | 0.0609411<br>81 | 0.0609908<br>53 | 2 |
| GO:00456<br>02 | negative regulation of endothelial cell differentiation                         | 0.0609411<br>81 | 0.0609908<br>53 | 2 |
| GO:00457<br>41 | positive regulation of epidermal growth factor-activated receptor activity      | 0.0609411<br>81 | 0.0609908<br>53 | 2 |
| GO:00480<br>96 | chromatin-mediated maintenance of transcription                                 | 0.0609411<br>81 | 0.0609908<br>53 | 2 |
| GO:00519<br>88 | regulation of attachment of spindle microtubules to kinetochore                 | 0.0609411<br>81 | 0.0609908<br>53 | 2 |
| GO:00606<br>01 | lateral sprouting from an epithelium                                            | 0.0609411<br>81 | 0.0609908<br>53 | 2 |
| GO:00610<br>29 | eyelid development in camera-type eye                                           | 0.0609411<br>81 | 0.0609908<br>53 | 2 |
| GO:00610<br>43 | regulation of vascular wound healing                                            | 0.0609411<br>81 | 0.0609908<br>53 | 2 |
| GO:00719<br>41 | nitrogen cycle metabolic process                                                | 0.0609411<br>81 | 0.0609908<br>53 | 2 |
| GO:00726<br>83 | T cell extravasation                                                            | 0.0609411<br>81 | 0.0609908<br>53 | 2 |
| GO:00971<br>52 | mesenchymal cell apoptotic process                                              | 0.0609411<br>81 | 0.0609908<br>53 | 2 |
| GO:00975<br>31 | mast cell migration                                                             | 0.0609411<br>81 | 0.0609908<br>53 | 2 |
| GO:00989<br>03 | regulation of membrane repolarization during action potential                   | 0.0609411<br>81 | 0.0609908<br>53 | 2 |

|                |                                                                        |                 |                 |   |
|----------------|------------------------------------------------------------------------|-----------------|-----------------|---|
| GO:19001<br>03 | positive regulation of endoplasmic reticulum unfolded protein response | 0.0609411<br>81 | 0.0609908<br>53 | 2 |
| GO:19010<br>96 | regulation of autophagosome maturation                                 | 0.0609411<br>81 | 0.0609908<br>53 | 2 |
| GO:19013<br>87 | positive regulation of voltage-gated calcium channel activity          | 0.0609411<br>81 | 0.0609908<br>53 | 2 |
| GO:19036<br>51 | positive regulation of cytoplasmic transport                           | 0.0609411<br>81 | 0.0609908<br>53 | 2 |
| GO:20001<br>21 | regulation of removal of superoxide radicals                           | 0.0609411<br>81 | 0.0609908<br>53 | 2 |
| GO:00508<br>21 | protein stabilization                                                  | 0.0618402<br>89 | 0.0618564<br>82 | 2 |
| GO:00488<br>64 | stem cell development                                                  | 0.0621926<br>21 | 0.0621745<br>37 | 2 |
| GO:00061<br>63 | purine nucleotide metabolic process                                    | 0.0626225<br>51 | 0.0625697<br>72 | 2 |
| GO:00107<br>69 | regulation of cell morphogenesis involved in differentiation           | 0.0630363<br>19 | 0.0629484<br>33 | 2 |
| GO:00073<br>69 | gastrulation                                                           | 0.0634281<br>29 | 0.0631991<br>47 | 2 |
| GO:00105<br>65 | regulation of cellular ketone metabolic process                        | 0.0634281<br>29 | 0.0631991<br>47 | 2 |
| GO:00067<br>67 | water-soluble vitamin metabolic process                                | 0.0634969<br>44 | 0.0631991<br>47 | 2 |
| GO:00320<br>92 | positive regulation of protein binding                                 | 0.0634969<br>44 | 0.0631991<br>47 | 2 |
| GO:00705<br>09 | calcium ion import                                                     | 0.0634969<br>44 | 0.0631991<br>47 | 2 |
| GO:00723<br>84 | organelle transport along microtubule                                  | 0.0634969<br>44 | 0.0631991<br>47 | 2 |
| GO:00705<br>07 | regulation of microtubule cytoskeleton organization                    | 0.0642291<br>44 | 0.0636610<br>44 | 2 |
| GO:00149<br>10 | regulation of smooth muscle cell migration                             | 0.0648105<br>41 | 0.0636610<br>44 | 2 |
| GO:00425<br>09 | regulation of tyrosine phosphorylation of STAT protein                 | 0.0648105<br>41 | 0.0636610<br>44 | 2 |
| GO:00454<br>45 | myoblast differentiation                                               | 0.0648105<br>41 | 0.0636610<br>44 | 2 |
| GO:00507<br>72 | positive regulation of axonogenesis                                    | 0.0648105<br>41 | 0.0636610<br>44 | 2 |
| GO:00000<br>54 | ribosomal subunit export from nucleus                                  | 0.0654738<br>47 | 0.0636610<br>44 | 2 |
| GO:00071<br>00 | mitotic centrosome separation                                          | 0.0654738<br>47 | 0.0636610<br>44 | 2 |

|                |                                                                        |                 |                 |   |
|----------------|------------------------------------------------------------------------|-----------------|-----------------|---|
| GO:00075<br>12 | adult heart development                                                | 0.0654738<br>47 | 0.0636610<br>44 | 2 |
| GO:00092<br>14 | cyclic nucleotide catabolic process                                    | 0.0654738<br>47 | 0.0636610<br>44 | 2 |
| GO:00102<br>48 | establishment or maintenance of transmembrane electrochemical gradient | 0.0654738<br>47 | 0.0636610<br>44 | 2 |
| GO:00107<br>52 | regulation of cGMP-mediated signaling                                  | 0.0654738<br>47 | 0.0636610<br>44 | 2 |
| GO:00109<br>17 | negative regulation of mitochondrial membrane potential                | 0.0654738<br>47 | 0.0636610<br>44 | 2 |
| GO:00148<br>54 | response to inactivity                                                 | 0.0654738<br>47 | 0.0636610<br>44 | 2 |
| GO:00148<br>74 | response to stimulus involved in regulation of muscle adaptation       | 0.0654738<br>47 | 0.0636610<br>44 | 2 |
| GO:00198<br>96 | axonal transport of mitochondrion                                      | 0.0654738<br>47 | 0.0636610<br>44 | 2 |
| GO:00312<br>82 | regulation of guanylate cyclase activity                               | 0.0654738<br>47 | 0.0636610<br>44 | 2 |
| GO:00320<br>42 | mitochondrial DNA metabolic process                                    | 0.0654738<br>47 | 0.0636610<br>44 | 2 |
| GO:00323<br>10 | prostaglandin secretion                                                | 0.0654738<br>47 | 0.0636610<br>44 | 2 |
| GO:00336<br>04 | negative regulation of catecholamine secretion                         | 0.0654738<br>47 | 0.0636610<br>44 | 2 |
| GO:00337<br>50 | ribosome localization                                                  | 0.0654738<br>47 | 0.0636610<br>44 | 2 |
| GO:00343<br>56 | NAD biosynthesis via nicotinamide riboside salvage pathway             | 0.0654738<br>47 | 0.0636610<br>44 | 2 |
| GO:00351<br>12 | genitalia morphogenesis                                                | 0.0654738<br>47 | 0.0636610<br>44 | 2 |
| GO:00426<br>59 | regulation of cell fate specification                                  | 0.0654738<br>47 | 0.0636610<br>44 | 2 |
| GO:00439<br>22 | negative regulation by host of viral transcription                     | 0.0654738<br>47 | 0.0636610<br>44 | 2 |
| GO:00460<br>07 | negative regulation of activated T cell proliferation                  | 0.0654738<br>47 | 0.0636610<br>44 | 2 |
| GO:00474<br>84 | regulation of response to osmotic stress                               | 0.0654738<br>47 | 0.0636610<br>44 | 2 |
| GO:00515<br>47 | regulation of keratinocyte migration                                   | 0.0654738<br>47 | 0.0636610<br>44 | 2 |
| GO:00517<br>09 | regulation of killing of cells of other organism                       | 0.0654738<br>47 | 0.0636610<br>44 | 2 |
| GO:00550<br>64 | chloride ion homeostasis                                               | 0.0654738<br>47 | 0.0636610<br>44 | 2 |



|                |                                                                                  |                 |                 |   |
|----------------|----------------------------------------------------------------------------------|-----------------|-----------------|---|
| GO:00604<br>52 | positive regulation of cardiac muscle contraction                                | 0.0654738<br>47 | 0.0636610<br>44 | 2 |
| GO:00702<br>34 | positive regulation of T cell apoptotic process                                  | 0.0654738<br>47 | 0.0636610<br>44 | 2 |
| GO:00704<br>31 | nucleotide-binding oligomerization domain containing 2 signaling pathway         | 0.0654738<br>47 | 0.0636610<br>44 | 2 |
| GO:00712<br>36 | cellular response to antibiotic                                                  | 0.0654738<br>47 | 0.0636610<br>44 | 2 |
| GO:00724<br>25 | signal transduction involved in G2 DNA damage checkpoint                         | 0.0654738<br>47 | 0.0636610<br>44 | 2 |
| GO:00902<br>31 | regulation of spindle checkpoint                                                 | 0.0654738<br>47 | 0.0636610<br>44 | 2 |
| GO:00902<br>66 | regulation of mitotic cell cycle spindle assembly checkpoint                     | 0.0654738<br>47 | 0.0636610<br>44 | 2 |
| GO:19018<br>41 | regulation of high voltage-gated calcium channel activity                        | 0.0654738<br>47 | 0.0636610<br>44 | 2 |
| GO:19028<br>94 | negative regulation of pri-miRNA transcription by RNA polymerase II              | 0.0654738<br>47 | 0.0636610<br>44 | 2 |
| GO:19035<br>04 | regulation of mitotic spindle checkpoint                                         | 0.0654738<br>47 | 0.0636610<br>44 | 2 |
| GO:19038<br>94 | regulation of IRE1-mediated unfolded protein response                            | 0.0654738<br>47 | 0.0636610<br>44 | 2 |
| GO:19047<br>48 | regulation of apoptotic process involved in development                          | 0.0654738<br>47 | 0.0636610<br>44 | 2 |
| GO:19050<br>64 | negative regulation of vascular associated smooth muscle cell differentiation    | 0.0654738<br>47 | 0.0636610<br>44 | 2 |
| GO:20012<br>79 | regulation of unsaturated fatty acid biosynthetic process                        | 0.0654738<br>47 | 0.0636610<br>44 | 2 |
| GO:00064<br>13 | translational initiation                                                         | 0.0658452<br>78 | 0.0639534<br>61 | 2 |
| GO:00480<br>15 | phosphatidylinositol-mediated signaling                                          | 0.0658452<br>78 | 0.0639534<br>61 | 2 |
| GO:00090<br>60 | aerobic respiration                                                              | 0.0661332<br>92 | 0.0640612<br>7  | 2 |
| GO:00324<br>36 | positive regulation of proteasomal ubiquitin-dependent protein catabolic process | 0.0661332<br>92 | 0.0640612<br>7  | 2 |
| GO:00514<br>53 | regulation of intracellular pH                                                   | 0.0661332<br>92 | 0.0640612<br>7  | 2 |
| GO:00517<br>81 | positive regulation of cell division                                             | 0.0661332<br>92 | 0.0640612<br>7  | 2 |
| GO:00604<br>20 | regulation of heart growth                                                       | 0.0661332<br>92 | 0.0640612<br>7  | 2 |
| GO:00064<br>17 | regulation of translation                                                        | 0.0665509<br>45 | 0.0644313<br>45 | 2 |

|                |                                                                |                 |                 |   |
|----------------|----------------------------------------------------------------|-----------------|-----------------|---|
| GO:00140<br>68 | positive regulation of phosphatidylinositol 3-kinase signaling | 0.0674650<br>83 | 0.0651768<br>78 | 2 |
| GO:00324<br>10 | negative regulation of transporter activity                    | 0.0674650<br>83 | 0.0651768<br>78 | 2 |
| GO:00327<br>55 | positive regulation of interleukin-6 production                | 0.0674650<br>83 | 0.0651768<br>78 | 2 |
| GO:00464<br>70 | phosphatidylcholine metabolic process                          | 0.0674650<br>83 | 0.0651768<br>78 | 2 |
| GO:00072<br>60 | tyrosine phosphorylation of STAT protein                       | 0.0688057<br>97 | 0.0661974<br>84 | 2 |
| GO:00140<br>33 | neural crest cell differentiation                              | 0.0688057<br>97 | 0.0661974<br>84 | 2 |
| GO:19010<br>19 | regulation of calcium ion transmembrane transporter activity   | 0.0688057<br>97 | 0.0661974<br>84 | 2 |
| GO:00095<br>66 | fertilization                                                  | 0.0691334<br>57 | 0.0661974<br>84 | 2 |
| GO:00480<br>17 | inositol lipid-mediated signaling                              | 0.0691334<br>57 | 0.0661974<br>84 | 2 |
| GO:00718<br>97 | DNA biosynthetic process                                       | 0.0691334<br>57 | 0.0661974<br>84 | 2 |
| GO:00097<br>49 | response to glucose                                            | 0.0699670<br>44 | 0.0661974<br>84 | 2 |
| GO:00512<br>16 | cartilage development                                          | 0.0699670<br>44 | 0.0661974<br>84 | 2 |
| GO:00061<br>22 | mitochondrial electron transport, ubiquinol to cytochrome c    | 0.0699848<br>74 | 0.0661974<br>84 | 2 |
| GO:00094<br>04 | toxin metabolic process                                        | 0.0699848<br>74 | 0.0661974<br>84 | 2 |
| GO:00107<br>63 | positive regulation of fibroblast migration                    | 0.0699848<br>74 | 0.0661974<br>84 | 2 |
| GO:00200<br>27 | hemoglobin metabolic process                                   | 0.0699848<br>74 | 0.0661974<br>84 | 2 |
| GO:00219<br>24 | cell proliferation in external granule layer                   | 0.0699848<br>74 | 0.0661974<br>84 | 2 |
| GO:00219<br>30 | cerebellar granule cell precursor proliferation                | 0.0699848<br>74 | 0.0661974<br>84 | 2 |
| GO:00302<br>38 | male sex determination                                         | 0.0699848<br>74 | 0.0661974<br>84 | 2 |
| GO:00322<br>52 | secretory granule localization                                 | 0.0699848<br>74 | 0.0661974<br>84 | 2 |
| GO:00336<br>89 | negative regulation of osteoblast proliferation                | 0.0699848<br>74 | 0.0661974<br>84 | 2 |
| GO:00356<br>35 | entry of bacterium into host cell                              | 0.0699848<br>74 | 0.0661974<br>84 | 2 |

|                |                                                               |                 |                 |   |
|----------------|---------------------------------------------------------------|-----------------|-----------------|---|
| GO:00357<br>45 | T-helper 2 cell cytokine production                           | 0.0699848<br>74 | 0.0661974<br>84 | 2 |
| GO:00423<br>62 | fat-soluble vitamin biosynthetic process                      | 0.0699848<br>74 | 0.0661974<br>84 | 2 |
| GO:00433<br>74 | CD8-positive, alpha-beta T cell differentiation               | 0.0699848<br>74 | 0.0661974<br>84 | 2 |
| GO:00454<br>75 | locomotor rhythm                                              | 0.0699848<br>74 | 0.0661974<br>84 | 2 |
| GO:00457<br>79 | negative regulation of bone resorption                        | 0.0699848<br>74 | 0.0661974<br>84 | 2 |
| GO:00458<br>37 | negative regulation of membrane potential                     | 0.0699848<br>74 | 0.0661974<br>84 | 2 |
| GO:00464<br>79 | glycosphingolipid catabolic process                           | 0.0699848<br>74 | 0.0661974<br>84 | 2 |
| GO:00507<br>46 | regulation of lipoprotein metabolic process                   | 0.0699848<br>74 | 0.0661974<br>84 | 2 |
| GO:00508<br>62 | positive regulation of T cell receptor signaling pathway      | 0.0699848<br>74 | 0.0661974<br>84 | 2 |
| GO:00512<br>99 | centrosome separation                                         | 0.0699848<br>74 | 0.0661974<br>84 | 2 |
| GO:00601<br>34 | prepulse inhibition                                           | 0.0699848<br>74 | 0.0661974<br>84 | 2 |
| GO:00603<br>47 | heart trabecula formation                                     | 0.0699848<br>74 | 0.0661974<br>84 | 2 |
| GO:00608<br>41 | venous blood vessel development                               | 0.0699848<br>74 | 0.0661974<br>84 | 2 |
| GO:00708<br>85 | negative regulation of calcineurin-NFAT signaling cascade     | 0.0699848<br>74 | 0.0661974<br>84 | 2 |
| GO:00714<br>28 | rRNA-containing ribonucleoprotein complex export from nucleus | 0.0699848<br>74 | 0.0661974<br>84 | 2 |
| GO:00718<br>01 | regulation of podosome assembly                               | 0.0699848<br>74 | 0.0661974<br>84 | 2 |
| GO:00725<br>67 | chemokine (C-X-C motif) ligand 2 production                   | 0.0699848<br>74 | 0.0661974<br>84 | 2 |
| GO:00905<br>94 | inflammatory response to wounding                             | 0.0699848<br>74 | 0.0661974<br>84 | 2 |
| GO:00972<br>02 | activation of cysteine-type endopeptidase activity            | 0.0699848<br>74 | 0.0661974<br>84 | 2 |
| GO:01060<br>57 | negative regulation of calcineurin-mediated signaling         | 0.0699848<br>74 | 0.0661974<br>84 | 2 |
| GO:19039<br>60 | negative regulation of anion transmembrane transport          | 0.0699848<br>74 | 0.0661974<br>84 | 2 |
| GO:20003<br>41 | regulation of chemokine (C-X-C motif) ligand 2 production     | 0.0699848<br>74 | 0.0661974<br>84 | 2 |

|                |                                                                                     |                 |                 |   |
|----------------|-------------------------------------------------------------------------------------|-----------------|-----------------|---|
| GO:00464<br>27 | positive regulation of receptor signaling pathway via JAK-STAT                      | 0.0701553<br>19 | 0.0663240<br>36 | 2 |
| GO:00076<br>26 | locomotory behavior                                                                 | 0.0708052<br>12 | 0.0669034<br>82 | 2 |
| GO:00424<br>75 | odontogenesis of dentin-containing tooth                                            | 0.0715135<br>36 | 0.0674670<br>81 | 2 |
| GO:00603<br>33 | interferon-gamma-mediated signaling pathway                                         | 0.0715135<br>36 | 0.0674670<br>81 | 2 |
| GO:00973<br>06 | cellular response to alcohol                                                        | 0.0715135<br>36 | 0.0674670<br>81 | 2 |
| GO:19033<br>21 | negative regulation of protein modification by small protein conjugation or removal | 0.0728803<br>35 | 0.0687207<br>13 | 2 |
| GO:00026<br>83 | negative regulation of immune system process                                        | 0.0732239<br>27 | 0.0689306<br>4  | 2 |
| GO:00022<br>21 | pattern recognition receptor signaling pathway                                      | 0.0733470<br>06 | 0.0689306<br>4  | 2 |
| GO:00071<br>79 | transforming growth factor beta receptor signaling pathway                          | 0.0742033<br>05 | 0.0689306<br>4  | 2 |
| GO:00068<br>98 | receptor-mediated endocytosis                                                       | 0.0742066<br>86 | 0.0689306<br>4  | 2 |
| GO:00149<br>09 | smooth muscle cell migration                                                        | 0.0742556<br>02 | 0.0689306<br>4  | 2 |
| GO:00517<br>02 | interaction with symbiont                                                           | 0.0742556<br>02 | 0.0689306<br>4  | 2 |
| GO:00610<br>97 | regulation of protein tyrosine kinase activity                                      | 0.0742556<br>02 | 0.0689306<br>4  | 2 |
| GO:00720<br>80 | nephron tubule development                                                          | 0.0742556<br>02 | 0.0689306<br>4  | 2 |
| GO:19048<br>94 | positive regulation of receptor signaling pathway via STAT                          | 0.0742556<br>02 | 0.0689306<br>4  | 2 |
| GO:00017<br>80 | neutrophil homeostasis                                                              | 0.0744743<br>64 | 0.0689306<br>4  | 2 |
| GO:00022<br>95 | T-helper cell lineage commitment                                                    | 0.0744743<br>64 | 0.0689306<br>4  | 2 |
| GO:00028<br>30 | positive regulation of type 2 immune response                                       | 0.0744743<br>64 | 0.0689306<br>4  | 2 |
| GO:00060<br>98 | pentose-phosphate shunt                                                             | 0.0744743<br>64 | 0.0689306<br>4  | 2 |
| GO:00102<br>25 | response to UV-C                                                                    | 0.0744743<br>64 | 0.0689306<br>4  | 2 |
| GO:00140<br>61 | regulation of norepinephrine secretion                                              | 0.0744743<br>64 | 0.0689306<br>4  | 2 |
| GO:00170<br>14 | protein nitrosylation                                                               | 0.0744743<br>64 | 0.0689306<br>4  | 2 |

|                |                                                                                                              |                 |                 |   |
|----------------|--------------------------------------------------------------------------------------------------------------|-----------------|-----------------|---|
| GO:00181<br>19 | peptidyl-cysteine S-nitrosylation                                                                            | 0.0744743<br>64 | 0.0689306<br>4  | 2 |
| GO:00195<br>11 | peptidyl-proline hydroxylation                                                                               | 0.0744743<br>64 | 0.0689306<br>4  | 2 |
| GO:00215<br>34 | cell proliferation in hindbrain                                                                              | 0.0744743<br>64 | 0.0689306<br>4  | 2 |
| GO:00330<br>33 | negative regulation of myeloid cell apoptotic process                                                        | 0.0744743<br>64 | 0.0689306<br>4  | 2 |
| GO:00341<br>16 | positive regulation of heterotypic cell-cell adhesion                                                        | 0.0744743<br>64 | 0.0689306<br>4  | 2 |
| GO:00343<br>74 | low-density lipoprotein particle remodeling                                                                  | 0.0744743<br>64 | 0.0689306<br>4  | 2 |
| GO:00458<br>38 | positive regulation of membrane potential                                                                    | 0.0744743<br>64 | 0.0689306<br>4  | 2 |
| GO:00459<br>89 | positive regulation of striated muscle contraction                                                           | 0.0744743<br>64 | 0.0689306<br>4  | 2 |
| GO:00463<br>25 | negative regulation of glucose import                                                                        | 0.0744743<br>64 | 0.0689306<br>4  | 2 |
| GO:00605<br>72 | morphogenesis of an epithelial bud                                                                           | 0.0744743<br>64 | 0.0689306<br>4  | 2 |
| GO:00614<br>50 | trophoblast cell migration                                                                                   | 0.0744743<br>64 | 0.0689306<br>4  | 2 |
| GO:00708<br>86 | positive regulation of calcineurin-NFAT signaling cascade                                                    | 0.0744743<br>64 | 0.0689306<br>4  | 2 |
| GO:00713<br>80 | cellular response to prostaglandin E stimulus                                                                | 0.0744743<br>64 | 0.0689306<br>4  | 2 |
| GO:00991<br>70 | postsynaptic modulation of chemical synaptic transmission                                                    | 0.0744743<br>64 | 0.0689306<br>4  | 2 |
| GO:01060<br>58 | positive regulation of calcineurin-mediated signaling                                                        | 0.0744743<br>64 | 0.0689306<br>4  | 2 |
| GO:19011<br>63 | regulation of trophoblast cell migration                                                                     | 0.0744743<br>64 | 0.0689306<br>4  | 2 |
| GO:19021<br>66 | negative regulation of intrinsic apoptotic signaling pathway in response to DNA damage by p53 class mediator | 0.0744743<br>64 | 0.0689306<br>4  | 2 |
| GO:19025<br>14 | regulation of calcium ion transmembrane transport via high voltage-gated calcium channel                     | 0.0744743<br>64 | 0.0689306<br>4  | 2 |
| GO:19050<br>50 | positive regulation of metallopeptidase activity                                                             | 0.0744743<br>64 | 0.0689306<br>4  | 2 |
| GO:20012<br>12 | regulation of vasculogenesis                                                                                 | 0.0744743<br>64 | 0.0689306<br>4  | 2 |
| GO:00064<br>73 | protein acetylation                                                                                          | 0.0750640<br>89 | 0.0694409<br>48 | 2 |
| GO:00106<br>60 | regulation of muscle cell apoptotic process                                                                  | 0.0756392<br>27 | 0.0697590<br>17 | 2 |

|                |                                                |                 |                 |   |
|----------------|------------------------------------------------|-----------------|-----------------|---|
| GO:00306<br>41 | regulation of cellular pH                      | 0.0756392<br>27 | 0.0697590<br>17 | 2 |
| GO:00343<br>08 | primary alcohol metabolic process              | 0.0756392<br>27 | 0.0697590<br>17 | 2 |
| GO:00457<br>78 | positive regulation of ossification            | 0.0756392<br>27 | 0.0697590<br>17 | 2 |
| GO:00609<br>93 | kidney morphogenesis                           | 0.0756392<br>27 | 0.0697590<br>17 | 2 |
| GO:19059<br>54 | positive regulation of lipid localization      | 0.0756392<br>27 | 0.0697590<br>17 | 2 |
| GO:00511<br>68 | nuclear export                                 | 0.0759293<br>4  | 0.0699909<br>03 | 2 |
| GO:00507<br>09 | negative regulation of protein secretion       | 0.0770310<br>99 | 0.0708620<br>98 | 2 |
| GO:00613<br>26 | renal tubule development                       | 0.0770310<br>99 | 0.0708620<br>98 | 2 |
| GO:00701<br>67 | regulation of biomineral tissue development    | 0.0770310<br>99 | 0.0708620<br>98 | 2 |
| GO:01101<br>49 | regulation of biomineralization                | 0.0770310<br>99 | 0.0708620<br>98 | 2 |
| GO:00356<br>37 | multicellular organismal signaling             | 0.0776731<br>59 | 0.0714164<br>32 | 2 |
| GO:00725<br>21 | purine-containing compound metabolic process   | 0.0780521<br>78 | 0.0716729<br>7  | 2 |
| GO:00508<br>66 | negative regulation of cell activation         | 0.0785516<br>9  | 0.0716729<br>7  | 2 |
| GO:19013<br>43 | negative regulation of vasculature development | 0.0785516<br>9  | 0.0716729<br>7  | 2 |
| GO:00031<br>84 | pulmonary valve morphogenesis                  | 0.0789424<br>19 | 0.0716729<br>7  | 2 |
| GO:00083<br>40 | determination of adult lifespan                | 0.0789424<br>19 | 0.0716729<br>7  | 2 |
| GO:00092<br>99 | mRNA transcription                             | 0.0789424<br>19 | 0.0716729<br>7  | 2 |
| GO:00107<br>15 | regulation of extracellular matrix disassembly | 0.0789424<br>19 | 0.0716729<br>7  | 2 |
| GO:00157<br>32 | prostaglandin transport                        | 0.0789424<br>19 | 0.0716729<br>7  | 2 |
| GO:00193<br>77 | glycolipid catabolic process                   | 0.0789424<br>19 | 0.0716729<br>7  | 2 |
| GO:00307<br>30 | sequestering of triglyceride                   | 0.0789424<br>19 | 0.0716729<br>7  | 2 |
| GO:00308<br>89 | negative regulation of B cell proliferation    | 0.0789424<br>19 | 0.0716729<br>7  | 2 |

|                |                                                                                      |                 |                 |   |
|----------------|--------------------------------------------------------------------------------------|-----------------|-----------------|---|
| GO:00309<br>49 | positive regulation of vascular endothelial growth factor receptor signaling pathway | 0.0789424<br>19 | 0.0716729<br>7  | 2 |
| GO:00326<br>82 | negative regulation of chemokine production                                          | 0.0789424<br>19 | 0.0716729<br>7  | 2 |
| GO:00329<br>66 | negative regulation of collagen biosynthetic process                                 | 0.0789424<br>19 | 0.0716729<br>7  | 2 |
| GO:00357<br>29 | cellular response to hepatocyte growth factor stimulus                               | 0.0789424<br>19 | 0.0716729<br>7  | 2 |
| GO:00439<br>23 | positive regulation by host of viral transcription                                   | 0.0789424<br>19 | 0.0716729<br>7  | 2 |
| GO:00445<br>39 | long-chain fatty acid import into cell                                               | 0.0789424<br>19 | 0.0716729<br>7  | 2 |
| GO:00460<br>68 | cGMP metabolic process                                                               | 0.0789424<br>19 | 0.0716729<br>7  | 2 |
| GO:00468<br>51 | negative regulation of bone remodeling                                               | 0.0789424<br>19 | 0.0716729<br>7  | 2 |
| GO:00482<br>43 | norepinephrine secretion                                                             | 0.0789424<br>19 | 0.0716729<br>7  | 2 |
| GO:00901<br>41 | positive regulation of mitochondrial fission                                         | 0.0789424<br>19 | 0.0716729<br>7  | 2 |
| GO:00901<br>85 | negative regulation of kidney development                                            | 0.0789424<br>19 | 0.0716729<br>7  | 2 |
| GO:01403<br>54 | lipid import into cell                                                               | 0.0789424<br>19 | 0.0716729<br>7  | 2 |
| GO:19032<br>09 | positive regulation of oxidative stress-induced cell death                           | 0.0789424<br>19 | 0.0716729<br>7  | 1 |
| GO:19053<br>31 | negative regulation of morphogenesis of an epithelium                                | 0.0789424<br>19 | 0.0716729<br>7  | 1 |
| GO:00064<br>76 | protein deacetylation                                                                | 0.0798391<br>48 | 0.0723057<br>24 | 1 |
| GO:00427<br>75 | mitochondrial ATP synthesis coupled electron transport                               | 0.0798391<br>48 | 0.0723057<br>24 | 1 |
| GO:00507<br>64 | regulation of phagocytosis                                                           | 0.0798391<br>48 | 0.0723057<br>24 | 1 |
| GO:00986<br>59 | inorganic cation import across plasma membrane                                       | 0.0798391<br>48 | 0.0723057<br>24 | 1 |
| GO:00995<br>87 | inorganic ion import across plasma membrane                                          | 0.0798391<br>48 | 0.0723057<br>24 | 1 |
| GO:00353<br>03 | regulation of dephosphorylation                                                      | 0.0803218<br>92 | 0.0727065<br>28 | 1 |
| GO:00085<br>44 | epidermis development                                                                | 0.0808076<br>95 | 0.0731096<br>99 | 1 |
| GO:00452<br>16 | cell-cell junction organization                                                      | 0.0812135<br>25 | 0.0732946<br>05 | 1 |

|                |                                                           |                 |                 |   |
|----------------|-----------------------------------------------------------|-----------------|-----------------|---|
| GO:00016<br>57 | ureteric bud development                                  | 0.0812551<br>07 | 0.0732946<br>05 | 1 |
| GO:00106<br>57 | muscle cell apoptotic process                             | 0.0812551<br>07 | 0.0732946<br>05 | 1 |
| GO:00140<br>20 | primary neural tube formation                             | 0.0812551<br>07 | 0.0732946<br>05 | 1 |
| GO:00427<br>73 | ATP synthesis coupled electron transport                  | 0.0812551<br>07 | 0.0732946<br>05 | 1 |
| GO:00508<br>10 | regulation of steroid biosynthetic process                | 0.0812551<br>07 | 0.0732946<br>05 | 1 |
| GO:00027<br>03 | regulation of leukocyte mediated immunity                 | 0.0821094<br>84 | 0.0738934<br>64 | 1 |
| GO:00434<br>73 | pigmentation                                              | 0.0826788<br>8  | 0.0738934<br>64 | 1 |
| GO:00508<br>30 | defense response to Gram-positive bacterium               | 0.0826788<br>8  | 0.0738934<br>64 | 1 |
| GO:00721<br>63 | mesonephric epithelium development                        | 0.0826788<br>8  | 0.0738934<br>64 | 1 |
| GO:00721<br>64 | mesonephric tubule development                            | 0.0826788<br>8  | 0.0738934<br>64 | 1 |
| GO:00190<br>58 | viral life cycle                                          | 0.0828602<br>16 | 0.0738934<br>64 | 1 |
| GO:00066<br>43 | membrane lipid metabolic process                          | 0.0830097<br>5  | 0.0738934<br>64 | 1 |
| GO:00517<br>01 | interaction with host                                     | 0.0830097<br>5  | 0.0738934<br>64 | 1 |
| GO:00063<br>49 | regulation of gene expression by genetic imprinting       | 0.0833891<br>39 | 0.0738934<br>64 | 1 |
| GO:00066<br>77 | glycosylceramide metabolic process                        | 0.0833891<br>39 | 0.0738934<br>64 | 1 |
| GO:00067<br>40 | NADPH regeneration                                        | 0.0833891<br>39 | 0.0738934<br>64 | 1 |
| GO:00105<br>23 | negative regulation of calcium ion transport into cytosol | 0.0833891<br>39 | 0.0738934<br>64 | 1 |
| GO:00107<br>13 | negative regulation of collagen metabolic process         | 0.0833891<br>39 | 0.0738934<br>64 | 1 |
| GO:00312<br>93 | membrane protein intracellular domain proteolysis         | 0.0833891<br>39 | 0.0738934<br>64 | 1 |
| GO:00327<br>40 | positive regulation of interleukin-17 production          | 0.0833891<br>39 | 0.0738934<br>64 | 1 |
| GO:00327<br>80 | negative regulation of ATPase activity                    | 0.0833891<br>39 | 0.0738934<br>64 | 1 |
| GO:00331<br>94 | response to hydroperoxide                                 | 0.0833891<br>39 | 0.0738934<br>64 | 1 |



|                |                                                                                                     |                 |                 |   |
|----------------|-----------------------------------------------------------------------------------------------------|-----------------|-----------------|---|
| GO:00353<br>30 | regulation of hippo signaling                                                                       | 0.0833891<br>39 | 0.0738934<br>64 | 1 |
| GO:00432<br>17 | myelin maintenance                                                                                  | 0.0833891<br>39 | 0.0738934<br>64 | 1 |
| GO:00451<br>87 | regulation of circadian sleep/wake cycle, sleep                                                     | 0.0833891<br>39 | 0.0738934<br>64 | 1 |
| GO:00468<br>85 | regulation of hormone biosynthetic process                                                          | 0.0833891<br>39 | 0.0738934<br>64 | 1 |
| GO:00518<br>95 | negative regulation of focal adhesion assembly                                                      | 0.0833891<br>39 | 0.0738934<br>64 | 1 |
| GO:00600<br>04 | reflex                                                                                              | 0.0833891<br>39 | 0.0738934<br>64 | 1 |
| GO:00600<br>33 | anatomical structure regression                                                                     | 0.0833891<br>39 | 0.0738934<br>64 | 1 |
| GO:00604<br>57 | negative regulation of digestive system process                                                     | 0.0833891<br>39 | 0.0738934<br>64 | 1 |
| GO:00609<br>77 | coronary vasculature morphogenesis                                                                  | 0.0833891<br>39 | 0.0738934<br>64 | 1 |
| GO:00612<br>98 | retina vasculature development in camera-type eye                                                   | 0.0833891<br>39 | 0.0738934<br>64 | 1 |
| GO:00615<br>77 | calcium ion transmembrane transport via high voltage-gated calcium channel                          | 0.0833891<br>39 | 0.0738934<br>64 | 1 |
| GO:00713<br>18 | cellular response to ATP                                                                            | 0.0833891<br>39 | 0.0738934<br>64 | 1 |
| GO:00716<br>05 | monocyte chemotactic protein-1 production                                                           | 0.0833891<br>39 | 0.0738934<br>64 | 1 |
| GO:00716<br>37 | regulation of monocyte chemotactic protein-1 production                                             | 0.0833891<br>39 | 0.0738934<br>64 | 1 |
| GO:00901<br>90 | positive regulation of branching involved in ureteric bud morphogenesis                             | 0.0833891<br>39 | 0.0738934<br>64 | 1 |
| GO:01501<br>18 | negative regulation of cell-substrate junction organization                                         | 0.0833891<br>39 | 0.0738934<br>64 | 1 |
| GO:19002<br>21 | regulation of amyloid-beta clearance                                                                | 0.0833891<br>39 | 0.0738934<br>64 | 1 |
| GO:19015<br>24 | regulation of mitophagy                                                                             | 0.0833891<br>39 | 0.0738934<br>64 | 1 |
| GO:19021<br>65 | regulation of intrinsic apoptotic signaling pathway in response to DNA damage by p53 class mediator | 0.0833891<br>39 | 0.0738934<br>64 | 1 |
| GO:00901<br>50 | establishment of protein localization to membrane                                                   | 0.0835458<br>18 | 0.0739960<br>64 | 1 |
| GO:00160<br>51 | carbohydrate biosynthetic process                                                                   | 0.0839143<br>03 | 0.0742860<br>68 | 1 |
| GO:00066<br>72 | ceramide metabolic process                                                                          | 0.0841103<br>61 | 0.0743868<br>45 | 1 |

|                |                                                                      |                 |                 |   |
|----------------|----------------------------------------------------------------------|-----------------|-----------------|---|
| GO:00508<br>48 | regulation of calcium-mediated signaling                             | 0.0841103<br>61 | 0.0743868<br>45 | 1 |
| GO:00027<br>92 | negative regulation of peptide secretion                             | 0.0855494<br>43 | 0.0754751<br>17 | 1 |
| GO:00105<br>22 | regulation of calcium ion transport into cytosol                     | 0.0855494<br>43 | 0.0754751<br>17 | 1 |
| GO:00159<br>08 | fatty acid transport                                                 | 0.0855494<br>43 | 0.0754751<br>17 | 1 |
| GO:00421<br>02 | positive regulation of T cell proliferation                          | 0.0855494<br>43 | 0.0754751<br>17 | 1 |
| GO:00601<br>91 | regulation of lipase activity                                        | 0.0855494<br>43 | 0.0754751<br>17 | 1 |
| GO:00516<br>51 | maintenance of location in cell                                      | 0.0866534<br>75 | 0.0762101<br>95 | 1 |
| GO:00550<br>24 | regulation of cardiac muscle tissue development                      | 0.0869960<br>23 | 0.0762101<br>95 | 1 |
| GO:20000<br>60 | positive regulation of ubiquitin-dependent protein catabolic process | 0.0869960<br>23 | 0.0762101<br>95 | 1 |
| GO:00016<br>96 | gastric acid secretion                                               | 0.0878146<br>27 | 0.0762101<br>95 | 1 |
| GO:00020<br>76 | osteoblast development                                               | 0.0878146<br>27 | 0.0762101<br>95 | 1 |
| GO:00029<br>22 | positive regulation of humoral immune response                       | 0.0878146<br>27 | 0.0762101<br>95 | 1 |
| GO:00031<br>59 | morphogenesis of an endothelium                                      | 0.0878146<br>27 | 0.0762101<br>95 | 1 |
| GO:00106<br>63 | positive regulation of striated muscle cell apoptotic process        | 0.0878146<br>27 | 0.0762101<br>95 | 1 |
| GO:00106<br>66 | positive regulation of cardiac muscle cell apoptotic process         | 0.0878146<br>27 | 0.0762101<br>95 | 1 |
| GO:00107<br>59 | positive regulation of macrophage chemotaxis                         | 0.0878146<br>27 | 0.0762101<br>95 | 1 |
| GO:00190<br>54 | modulation by virus of host cellular process                         | 0.0878146<br>27 | 0.0762101<br>95 | 1 |
| GO:00300<br>11 | maintenance of cell polarity                                         | 0.0878146<br>27 | 0.0762101<br>95 | 1 |
| GO:00320<br>26 | response to magnesium ion                                            | 0.0878146<br>27 | 0.0762101<br>95 | 1 |
| GO:00320<br>95 | regulation of response to food                                       | 0.0878146<br>27 | 0.0762101<br>95 | 1 |
| GO:00329<br>30 | positive regulation of superoxide anion generation                   | 0.0878146<br>27 | 0.0762101<br>95 | 1 |
| GO:00357<br>28 | response to hepatocyte growth factor                                 | 0.0878146<br>27 | 0.0762101<br>95 | 1 |

|                |                                                                                          |                 |                 |   |
|----------------|------------------------------------------------------------------------------------------|-----------------|-----------------|---|
| GO:00433<br>73 | CD4-positive, alpha-beta T cell lineage commitment                                       | 0.0878146<br>27 | 0.0762101<br>95 | 1 |
| GO:00450<br>91 | regulation of single stranded viral RNA replication via double stranded DNA intermediate | 0.0878146<br>27 | 0.0762101<br>95 | 1 |
| GO:00457<br>80 | positive regulation of bone resorption                                                   | 0.0878146<br>27 | 0.0762101<br>95 | 1 |
| GO:00464<br>85 | ether lipid metabolic process                                                            | 0.0878146<br>27 | 0.0762101<br>95 | 1 |
| GO:00468<br>52 | positive regulation of bone remodeling                                                   | 0.0878146<br>27 | 0.0762101<br>95 | 1 |
| GO:00482<br>45 | eosinophil chemotaxis                                                                    | 0.0878146<br>27 | 0.0762101<br>95 | 1 |
| GO:00484<br>90 | anterograde synaptic vesicle transport                                                   | 0.0878146<br>27 | 0.0762101<br>95 | 1 |
| GO:00515<br>46 | keratinocyte migration                                                                   | 0.0878146<br>27 | 0.0762101<br>95 | 1 |
| GO:00606<br>02 | branch elongation of an epithelium                                                       | 0.0878146<br>27 | 0.0762101<br>95 | 1 |
| GO:00611<br>54 | endothelial tube morphogenesis                                                           | 0.0878146<br>27 | 0.0762101<br>95 | 1 |
| GO:00702<br>33 | negative regulation of T cell apoptotic process                                          | 0.0878146<br>27 | 0.0762101<br>95 | 1 |
| GO:00718<br>00 | podosome assembly                                                                        | 0.0878146<br>27 | 0.0762101<br>95 | 1 |
| GO:00976<br>23 | potassium ion export across plasma membrane                                              | 0.0878146<br>27 | 0.0762101<br>95 | 1 |
| GO:00989<br>15 | membrane repolarization during ventricular cardiac muscle cell action potential          | 0.0878146<br>27 | 0.0762101<br>95 | 1 |
| GO:00995<br>14 | synaptic vesicle cytoskeletal transport                                                  | 0.0878146<br>27 | 0.0762101<br>95 | 1 |
| GO:00995<br>17 | synaptic vesicle transport along microtubule                                             | 0.0878146<br>27 | 0.0762101<br>95 | 1 |
| GO:20006<br>47 | negative regulation of stem cell proliferation                                           | 0.0878146<br>27 | 0.0762101<br>95 | 1 |
| GO:20006<br>96 | regulation of epithelial cell differentiation involved in kidney development             | 0.0878146<br>27 | 0.0762101<br>95 | 1 |
| GO:00018<br>23 | mesonephros development                                                                  | 0.0884499<br>95 | 0.0765779<br>61 | 1 |
| GO:00068<br>85 | regulation of pH                                                                         | 0.0884499<br>95 | 0.0765779<br>61 | 1 |
| GO:00305<br>93 | neutrophil chemotaxis                                                                    | 0.0884499<br>95 | 0.0765779<br>61 | 1 |
| GO:00704<br>98 | interleukin-1-mediated signaling pathway                                                 | 0.0884499<br>95 | 0.0765779<br>61 | 1 |

|                |                                                                                                                                                  |                 |                 |   |
|----------------|--------------------------------------------------------------------------------------------------------------------------------------------------|-----------------|-----------------|---|
| GO:19018<br>90 | positive regulation of cell junction assembly                                                                                                    | 0.0884499<br>95 | 0.0765779<br>61 | 1 |
| GO:00301<br>78 | negative regulation of Wnt signaling pathway                                                                                                     | 0.0894304<br>84 | 0.0773898<br>17 | 1 |
| GO:00023<br>67 | cytokine production involved in immune response                                                                                                  | 0.0899112<br>58 | 0.0776573<br>06 | 1 |
| GO:00033<br>00 | cardiac muscle hypertrophy                                                                                                                       | 0.0899112<br>58 | 0.0776573<br>06 | 1 |
| GO:00109<br>23 | negative regulation of phosphatase activity                                                                                                      | 0.0899112<br>58 | 0.0776573<br>06 | 1 |
| GO:00485<br>25 | negative regulation of viral process                                                                                                             | 0.0899112<br>58 | 0.0776573<br>06 | 1 |
| GO:00028<br>24 | positive regulation of adaptive immune response based on somatic recombination of immune receptors built from immunoglobulin superfamily domains | 0.0913797<br>1  | 0.0784004<br>11 | 1 |
| GO:00076<br>31 | feeding behavior                                                                                                                                 | 0.0913797<br>1  | 0.0784004<br>11 | 1 |
| GO:00440<br>70 | regulation of anion transport                                                                                                                    | 0.0913797<br>1  | 0.0784004<br>11 | 1 |
| GO:00620<br>14 | negative regulation of small molecule metabolic process                                                                                          | 0.0913797<br>1  | 0.0784004<br>11 | 1 |
| GO:00023<br>20 | lymphoid progenitor cell differentiation                                                                                                         | 0.0922189<br>81 | 0.0784004<br>11 | 1 |
| GO:00025<br>44 | chronic inflammatory response                                                                                                                    | 0.0922189<br>81 | 0.0784004<br>11 | 1 |
| GO:00026<br>89 | negative regulation of leukocyte chemotaxis                                                                                                      | 0.0922189<br>81 | 0.0784004<br>11 | 1 |
| GO:00027<br>26 | positive regulation of T cell cytokine production                                                                                                | 0.0922189<br>81 | 0.0784004<br>11 | 1 |
| GO:00029<br>02 | regulation of B cell apoptotic process                                                                                                           | 0.0922189<br>81 | 0.0784004<br>11 | 1 |
| GO:00033<br>23 | type B pancreatic cell development                                                                                                               | 0.0922189<br>81 | 0.0784004<br>11 | 1 |
| GO:00065<br>25 | arginine metabolic process                                                                                                                       | 0.0922189<br>81 | 0.0784004<br>11 | 1 |
| GO:00076<br>20 | copulation                                                                                                                                       | 0.0922189<br>81 | 0.0784004<br>11 | 1 |
| GO:00100<br>42 | response to manganese ion                                                                                                                        | 0.0922189<br>81 | 0.0784004<br>11 | 1 |
| GO:00108<br>75 | positive regulation of cholesterol efflux                                                                                                        | 0.0922189<br>81 | 0.0784004<br>11 | 1 |
| GO:00312<br>90 | retinal ganglion cell axon guidance                                                                                                              | 0.0922189<br>81 | 0.0784004<br>11 | 1 |
| GO:00319<br>98 | regulation of fatty acid beta-oxidation                                                                                                          | 0.0922189<br>81 | 0.0784004<br>11 | 1 |

|                |                                                                            |                 |                 |   |
|----------------|----------------------------------------------------------------------------|-----------------|-----------------|---|
| GO:00323<br>32 | positive regulation of chondrocyte differentiation                         | 0.0922189<br>81 | 0.0784004<br>11 | 1 |
| GO:00327<br>93 | positive regulation of CREB transcription factor activity                  | 0.0922189<br>81 | 0.0784004<br>11 | 1 |
| GO:00341<br>38 | toll-like receptor 3 signaling pathway                                     | 0.0922189<br>81 | 0.0784004<br>11 | 1 |
| GO:00363<br>03 | lymph vessel morphogenesis                                                 | 0.0922189<br>81 | 0.0784004<br>11 | 1 |
| GO:00396<br>92 | single stranded viral RNA replication via double stranded DNA intermediate | 0.0922189<br>81 | 0.0784004<br>11 | 1 |
| GO:00439<br>50 | positive regulation of cAMP-mediated signaling                             | 0.0922189<br>81 | 0.0784004<br>11 | 1 |
| GO:00603<br>53 | regulation of cell adhesion molecule production                            | 0.0922189<br>81 | 0.0784004<br>11 | 1 |
| GO:00605<br>46 | negative regulation of necroptotic process                                 | 0.0922189<br>81 | 0.0784004<br>11 | 1 |
| GO:00620<br>99 | negative regulation of programmed necrotic cell death                      | 0.0922189<br>81 | 0.0784004<br>11 | 1 |
| GO:00716<br>36 | positive regulation of transforming growth factor beta production          | 0.0922189<br>81 | 0.0784004<br>11 | 1 |
| GO:00717<br>31 | response to nitric oxide                                                   | 0.0922189<br>81 | 0.0784004<br>11 | 1 |
| GO:00860<br>14 | atrial cardiac muscle cell action potential                                | 0.0922189<br>81 | 0.0784004<br>11 | 1 |
| GO:00860<br>26 | atrial cardiac muscle cell to AV node cell signaling                       | 0.0922189<br>81 | 0.0784004<br>11 | 1 |
| GO:00860<br>66 | atrial cardiac muscle cell to AV node cell communication                   | 0.0922189<br>81 | 0.0784004<br>11 | 1 |
| GO:00977<br>09 | connective tissue replacement                                              | 0.0922189<br>81 | 0.0784004<br>11 | 1 |
| GO:00987<br>03 | calcium ion import across plasma membrane                                  | 0.0922189<br>81 | 0.0784004<br>11 | 1 |
| GO:19017<br>41 | positive regulation of myoblast fusion                                     | 0.0922189<br>81 | 0.0784004<br>11 | 1 |
| GO:00171<br>57 | regulation of exocytosis                                                   | 0.0922447<br>65 | 0.0784004<br>11 | 1 |
| GO:00018<br>41 | neural tube formation                                                      | 0.0928552<br>47 | 0.0787343<br>61 | 1 |
| GO:00027<br>08 | positive regulation of lymphocyte mediated immunity                        | 0.0928552<br>47 | 0.0787343<br>61 | 1 |
| GO:00148<br>12 | muscle cell migration                                                      | 0.0928552<br>47 | 0.0787343<br>61 | 1 |
| GO:00466<br>32 | alpha-beta T cell differentiation                                          | 0.0928552<br>47 | 0.0787343<br>61 | 1 |

|                |                                                                          |                 |                 |   |
|----------------|--------------------------------------------------------------------------|-----------------|-----------------|---|
| GO:00469<br>28 | regulation of neurotransmitter secretion                                 | 0.0928552<br>47 | 0.0787343<br>61 | 1 |
| GO:00026<br>99 | positive regulation of immune effector process                           | 0.0931910<br>42 | 0.0789820<br>79 | 1 |
| GO:00148<br>97 | striated muscle hypertrophy                                              | 0.0943377<br>71 | 0.0798044<br>48 | 1 |
| GO:00301<br>48 | sphingolipid biosynthetic process                                        | 0.0943377<br>71 | 0.0798044<br>48 | 1 |
| GO:00356<br>01 | protein deacylation                                                      | 0.0943377<br>71 | 0.0798044<br>48 | 1 |
| GO:00432<br>66 | regulation of potassium ion transport                                    | 0.0943377<br>71 | 0.0798044<br>48 | 1 |
| GO:00456<br>65 | negative regulation of neuron differentiation                            | 0.0950957<br>45 | 0.0801464<br>12 | 1 |
| GO:00071<br>78 | transmembrane receptor protein serine/threonine kinase signaling pathway | 0.0956268<br>87 | 0.0801464<br>12 | 1 |
| GO:00015<br>23 | retinoid metabolic process                                               | 0.0958271<br>81 | 0.0801464<br>12 | 1 |
| GO:00020<br>62 | chondrocyte differentiation                                              | 0.0958271<br>81 | 0.0801464<br>12 | 1 |
| GO:19027<br>50 | negative regulation of cell cycle G2/M phase transition                  | 0.0958271<br>81 | 0.0801464<br>12 | 1 |
| GO:00015<br>02 | cartilage condensation                                                   | 0.0966023<br>03 | 0.0801464<br>12 | 1 |
| GO:00020<br>29 | desensitization of G protein-coupled receptor signaling pathway          | 0.0966023<br>03 | 0.0801464<br>12 | 1 |
| GO:00031<br>77 | pulmonary valve development                                              | 0.0966023<br>03 | 0.0801464<br>12 | 1 |
| GO:00061<br>23 | mitochondrial electron transport, cytochrome c to oxygen                 | 0.0966023<br>03 | 0.0801464<br>12 | 1 |
| GO:00066<br>62 | glycerol ether metabolic process                                         | 0.0966023<br>03 | 0.0801464<br>12 | 1 |
| GO:00091<br>10 | vitamin biosynthetic process                                             | 0.0966023<br>03 | 0.0801464<br>12 | 1 |
| GO:00097<br>13 | catechol-containing compound biosynthetic process                        | 0.0966023<br>03 | 0.0801464<br>12 | 1 |
| GO:00108<br>29 | negative regulation of glucose transmembrane transport                   | 0.0966023<br>03 | 0.0801464<br>12 | 1 |
| GO:00108<br>93 | positive regulation of steroid biosynthetic process                      | 0.0966023<br>03 | 0.0801464<br>12 | 1 |
| GO:00148<br>21 | phasic smooth muscle contraction                                         | 0.0966023<br>03 | 0.0801464<br>12 | 1 |
| GO:00193<br>70 | leukotriene biosynthetic process                                         | 0.0966023<br>03 | 0.0801464<br>12 | 1 |

|                |                                                                  |                 |                 |   |
|----------------|------------------------------------------------------------------|-----------------|-----------------|---|
| GO:00196<br>46 | aerobic electron transport chain                                 | 0.0966023<br>03 | 0.0801464<br>12 | 1 |
| GO:00224<br>01 | negative adaptation of signaling pathway                         | 0.0966023<br>03 | 0.0801464<br>12 | 1 |
| GO:00305<br>02 | negative regulation of bone mineralization                       | 0.0966023<br>03 | 0.0801464<br>12 | 1 |
| GO:00353<br>57 | peroxisome proliferator activated receptor signaling pathway     | 0.0966023<br>03 | 0.0801464<br>12 | 1 |
| GO:00424<br>23 | catecholamine biosynthetic process                               | 0.0966023<br>03 | 0.0801464<br>12 | 1 |
| GO:00436<br>51 | linoleic acid metabolic process                                  | 0.0966023<br>03 | 0.0801464<br>12 | 1 |
| GO:00465<br>14 | ceramide catabolic process                                       | 0.0966023<br>03 | 0.0801464<br>12 | 1 |
| GO:00467<br>16 | muscle cell cellular homeostasis                                 | 0.0966023<br>03 | 0.0801464<br>12 | 1 |
| GO:00517<br>97 | regulation of hair follicle development                          | 0.0966023<br>03 | 0.0801464<br>12 | 1 |
| GO:00600<br>65 | uterus development                                               | 0.0966023<br>03 | 0.0801464<br>12 | 1 |
| GO:00607<br>13 | labyrinthine layer morphogenesis                                 | 0.0966023<br>03 | 0.0801464<br>12 | 1 |
| GO:00607<br>16 | labyrinthine layer blood vessel development                      | 0.0966023<br>03 | 0.0801464<br>12 | 1 |
| GO:00612<br>13 | positive regulation of mesonephros development                   | 0.0966023<br>03 | 0.0801464<br>12 | 1 |
| GO:00714<br>98 | cellular response to fluid shear stress                          | 0.0966023<br>03 | 0.0801464<br>12 | 1 |
| GO:00725<br>74 | hepatocyte proliferation                                         | 0.0966023<br>03 | 0.0801464<br>12 | 1 |
| GO:00725<br>75 | epithelial cell proliferation involved in liver morphogenesis    | 0.0966023<br>03 | 0.0801464<br>12 | 1 |
| GO:00902<br>01 | negative regulation of release of cytochrome c from mitochondria | 0.0966023<br>03 | 0.0801464<br>12 | 1 |
| GO:00902<br>80 | positive regulation of calcium ion import                        | 0.0966023<br>03 | 0.0801464<br>12 | 1 |
| GO:19026<br>56 | calcium ion import into cytosol                                  | 0.0966023<br>03 | 0.0801464<br>12 | 1 |
| GO:19030<br>55 | positive regulation of extracellular matrix organization         | 0.0966023<br>03 | 0.0801464<br>12 | 1 |
| GO:19032<br>04 | negative regulation of oxidative stress-induced neuron death     | 0.0966023<br>03 | 0.0801464<br>12 | 1 |
| GO:19035<br>99 | positive regulation of autophagy of mitochondrion                | 0.0966023<br>03 | 0.0801464<br>12 | 1 |

|                |                                                              |                 |                 |   |
|----------------|--------------------------------------------------------------|-----------------|-----------------|---|
| GO:19039<br>78 | regulation of microglial cell activation                     | 0.0966023<br>03 | 0.0801464<br>12 | 1 |
| GO:19048<br>86 | beta-catenin destruction complex disassembly                 | 0.0966023<br>03 | 0.0801464<br>12 | 1 |
| GO:20000<br>47 | regulation of cell-cell adhesion mediated by cadherin        | 0.0966023<br>03 | 0.0801464<br>12 | 1 |
| GO:20002<br>69 | regulation of fibroblast apoptotic process                   | 0.0966023<br>03 | 0.0801464<br>12 | 1 |
| GO:00022<br>86 | T cell activation involved in immune response                | 0.0973233<br>77 | 0.0806337<br>41 | 1 |
| GO:00148<br>96 | muscle hypertrophy                                           | 0.0973233<br>77 | 0.0806337<br>41 | 1 |
| GO:20002<br>78 | regulation of DNA biosynthetic process                       | 0.0973233<br>77 | 0.0806337<br>41 | 1 |
| GO:00028<br>21 | positive regulation of adaptive immune response              | 0.0988262<br>62 | 0.0817292<br>14 | 1 |
| GO:00066<br>64 | glycolipid metabolic process                                 | 0.0988262<br>62 | 0.0817292<br>14 | 1 |
| GO:00720<br>09 | nephron epithelium development                               | 0.0988262<br>62 | 0.0817292<br>14 | 1 |
| GO:19018<br>00 | positive regulation of proteasomal protein catabolic process | 0.0988262<br>62 | 0.0817292<br>14 | 1 |
| GO:00508<br>07 | regulation of synapse organization                           | 0.0989531<br>42 | 0.0817967<br>59 | 1 |
| GO:00353<br>05 | negative regulation of dephosphorylation                     | 0.1003357<br>39 | 0.0823683<br>27 | 1 |
| GO:00511<br>49 | positive regulation of muscle cell differentiation           | 0.1003357<br>39 | 0.0823683<br>27 | 1 |
| GO:00987<br>32 | macromolecule deacylation                                    | 0.1003357<br>39 | 0.0823683<br>27 | 1 |
| GO:19030<br>08 | organelle disassembly                                        | 0.1003357<br>39 | 0.0823683<br>27 | 1 |
| GO:19035<br>09 | liposaccharide metabolic process                             | 0.1003357<br>39 | 0.0823683<br>27 | 1 |
| GO:00020<br>89 | lens morphogenesis in camera-type eye                        | 0.1009646<br>9  | 0.0823683<br>27 | 1 |
| GO:00023<br>13 | mature B cell differentiation involved in immune response    | 0.1009646<br>9  | 0.0823683<br>27 | 1 |
| GO:00059<br>80 | glycogen catabolic process                                   | 0.1009646<br>9  | 0.0823683<br>27 | 1 |
| GO:00060<br>67 | ethanol metabolic process                                    | 0.1009646<br>9  | 0.0823683<br>27 | 1 |
| GO:00063<br>12 | mitotic recombination                                        | 0.1009646<br>9  | 0.0823683<br>27 | 1 |



|                |                                                                         |                 |                 |   |
|----------------|-------------------------------------------------------------------------|-----------------|-----------------|---|
| GO:00073<br>42 | fusion of sperm to egg plasma membrane involved in single fertilization | 0.1009646<br>9  | 0.0823683<br>27 | 1 |
| GO:00230<br>58 | adaptation of signaling pathway                                         | 0.1009646<br>9  | 0.0823683<br>27 | 1 |
| GO:00329<br>28 | regulation of superoxide anion generation                               | 0.1009646<br>9  | 0.0823683<br>27 | 1 |
| GO:00341<br>04 | negative regulation of tissue remodeling                                | 0.1009646<br>9  | 0.0823683<br>27 | 1 |
| GO:00350<br>24 | negative regulation of Rho protein signal transduction                  | 0.1009646<br>9  | 0.0823683<br>27 | 1 |
| GO:00355<br>84 | calcium-mediated signaling using intracellular calcium source           | 0.1009646<br>9  | 0.0823683<br>27 | 1 |
| GO:00423<br>59 | vitamin D metabolic process                                             | 0.1009646<br>9  | 0.0823683<br>27 | 1 |
| GO:00427<br>49 | regulation of circadian sleep/wake cycle                                | 0.1009646<br>9  | 0.0823683<br>27 | 1 |
| GO:00456<br>55 | regulation of monocyte differentiation                                  | 0.1009646<br>9  | 0.0823683<br>27 | 1 |
| GO:00456<br>63 | positive regulation of myoblast differentiation                         | 0.1009646<br>9  | 0.0823683<br>27 | 1 |
| GO:00460<br>58 | cAMP metabolic process                                                  | 0.1009646<br>9  | 0.0823683<br>27 | 1 |
| GO:00508<br>02 | circadian sleep/wake cycle, sleep                                       | 0.1009646<br>9  | 0.0823683<br>27 | 1 |
| GO:00550<br>93 | response to hyperoxia                                                   | 0.1009646<br>9  | 0.0823683<br>27 | 1 |
| GO:00603<br>52 | cell adhesion molecule production                                       | 0.1009646<br>9  | 0.0823683<br>27 | 1 |
| GO:00711<br>57 | negative regulation of cell cycle arrest                                | 0.1009646<br>9  | 0.0823683<br>27 | 1 |
| GO:00713<br>79 | cellular response to prostaglandin stimulus                             | 0.1009646<br>9  | 0.0823683<br>27 | 1 |
| GO:00725<br>76 | liver morphogenesis                                                     | 0.1009646<br>9  | 0.0823683<br>27 | 1 |
| GO:00901<br>89 | regulation of branching involved in ureteric bud morphogenesis          | 0.1009646<br>9  | 0.0823683<br>27 | 1 |
| GO:19017<br>39 | regulation of myoblast fusion                                           | 0.1009646<br>9  | 0.0823683<br>27 | 1 |
| GO:00062<br>75 | regulation of DNA replication                                           | 0.1018517<br>09 | 0.0830545<br>24 | 1 |
| GO:00300<br>98 | lymphocyte differentiation                                              | 0.1023409<br>33 | 0.0834158<br>67 | 1 |
| GO:00022<br>23 | stimulatory C-type lectin receptor signaling pathway                    | 0.1033740<br>78 | 0.0842200<br>25 | 1 |

|            |                                                                   |             |             |   |
|------------|-------------------------------------------------------------------|-------------|-------------|---|
| GO:0003279 | cardiac septum development                                        | 0.104902751 | 0.084500609 | 1 |
| GO:0016101 | diterpenoid metabolic process                                     | 0.104902751 | 0.084500609 | 1 |
| GO:0030004 | cellular monovalent inorganic cation homeostasis                  | 0.104902751 | 0.084500609 | 1 |
| GO:0098693 | regulation of synaptic vesicle cycle                              | 0.104902751 | 0.084500609 | 1 |
| GO:0000002 | mitochondrial genome maintenance                                  | 0.105306242 | 0.084500609 | 1 |
| GO:0001919 | regulation of receptor recycling                                  | 0.105306242 | 0.084500609 | 1 |
| GO:0006359 | regulation of transcription by RNA polymerase III                 | 0.105306242 | 0.084500609 | 1 |
| GO:0006582 | melanin metabolic process                                         | 0.105306242 | 0.084500609 | 1 |
| GO:0007274 | neuromuscular synaptic transmission                               | 0.105306242 | 0.084500609 | 1 |
| GO:0007413 | axonal fasciculation                                              | 0.105306242 | 0.084500609 | 1 |
| GO:0007617 | mating behavior                                                   | 0.105306242 | 0.084500609 | 1 |
| GO:0009251 | glucan catabolic process                                          | 0.105306242 | 0.084500609 | 1 |
| GO:0010226 | response to lithium ion                                           | 0.105306242 | 0.084500609 | 1 |
| GO:0010288 | response to lead ion                                              | 0.105306242 | 0.084500609 | 1 |
| GO:0030539 | male genitalia development                                        | 0.105306242 | 0.084500609 | 1 |
| GO:0031639 | plasminogen activation                                            | 0.105306242 | 0.084500609 | 1 |
| GO:0032098 | regulation of appetite                                            | 0.105306242 | 0.084500609 | 1 |
| GO:0034643 | establishment of mitochondrion localization, microtubule-mediated | 0.105306242 | 0.084500609 | 1 |
| GO:0035743 | CD4-positive, alpha-beta T cell cytokine production               | 0.105306242 | 0.084500609 | 1 |
| GO:0045723 | positive regulation of fatty acid biosynthetic process            | 0.105306242 | 0.084500609 | 1 |
| GO:0047497 | mitochondrion transport along microtubule                         | 0.105306242 | 0.084500609 | 1 |
| GO:0051151 | negative regulation of smooth muscle cell differentiation         | 0.105306242 | 0.084500609 | 1 |

|                |                                                                                                       |                 |                 |   |
|----------------|-------------------------------------------------------------------------------------------------------|-----------------|-----------------|---|
| GO:00604<br>45 | branching involved in salivary gland morphogenesis                                                    | 0.1053062<br>42 | 0.0845006<br>09 | 1 |
| GO:00605<br>47 | negative regulation of necrotic cell death                                                            | 0.1053062<br>42 | 0.0845006<br>09 | 1 |
| GO:00705<br>84 | mitochondrion morphogenesis                                                                           | 0.1053062<br>42 | 0.0845006<br>09 | 1 |
| GO:00709<br>35 | 3'-UTR-mediated mRNA stabilization                                                                    | 0.1053062<br>42 | 0.0845006<br>09 | 1 |
| GO:00726<br>77 | eosinophil migration                                                                                  | 0.1053062<br>42 | 0.0845006<br>09 | 1 |
| GO:00903<br>43 | positive regulation of cell aging                                                                     | 0.1053062<br>42 | 0.0845006<br>09 | 1 |
| GO:01060<br>30 | neuron projection fasciculation                                                                       | 0.1053062<br>42 | 0.0845006<br>09 | 1 |
| GO:19019<br>84 | negative regulation of protein acetylation                                                            | 0.1053062<br>42 | 0.0845006<br>09 | 1 |
| GO:19020<br>01 | fatty acid transmembrane transport                                                                    | 0.1053062<br>42 | 0.0845006<br>09 | 1 |
| GO:19022<br>54 | negative regulation of intrinsic apoptotic signaling pathway by p53 class mediator                    | 0.1053062<br>42 | 0.0845006<br>09 | 1 |
| GO:19035<br>89 | positive regulation of blood vessel endothelial cell proliferation involved in sprouting angiogenesis | 0.1053062<br>42 | 0.0845006<br>09 | 1 |
| GO:20008<br>10 | regulation of bicellular tight junction assembly                                                      | 0.1053062<br>42 | 0.0845006<br>09 | 1 |
| GO:00060<br>96 | glycolytic process                                                                                    | 0.1064376<br>31 | 0.0853706<br>08 | 1 |
| GO:00328<br>72 | regulation of stress-activated MAPK cascade                                                           | 0.1068550<br>21 | 0.0856674<br>12 | 1 |
| GO:00301<br>11 | regulation of Wnt signaling pathway                                                                   | 0.1077105<br>89 | 0.0863150<br>92 | 1 |
| GO:00022<br>20 | innate immune response activating cell surface receptor signaling pathway                             | 0.1079786<br>26 | 0.0864150<br>74 | 1 |
| GO:00067<br>57 | ATP generation from ADP                                                                               | 0.1079786<br>26 | 0.0864150<br>74 | 1 |
| GO:00229<br>04 | respiratory electron transport chain                                                                  | 0.1079786<br>26 | 0.0864150<br>74 | 1 |
| GO:00064<br>02 | mRNA catabolic process                                                                                | 0.1084880<br>44 | 0.0867843<br>77 | 1 |
| GO:00027<br>58 | innate immune response-activating signal transduction                                                 | 0.1095256<br>44 | 0.0868508<br>22 | 1 |
| GO:00149<br>02 | myotube differentiation                                                                               | 0.1095256<br>44 | 0.0868508<br>22 | 1 |
| GO:00436<br>66 | regulation of phosphoprotein phosphatase activity                                                     | 0.1095256<br>44 | 0.0868508<br>22 | 1 |

|                |                                                                        |                 |                 |   |
|----------------|------------------------------------------------------------------------|-----------------|-----------------|---|
| GO:00017<br>59 | organ induction                                                        | 0.1096270<br>58 | 0.0868508<br>22 | 1 |
| GO:00024<br>38 | acute inflammatory response to antigenic stimulus                      | 0.1096270<br>58 | 0.0868508<br>22 | 1 |
| GO:00027<br>19 | negative regulation of cytokine production involved in immune response | 0.1096270<br>58 | 0.0868508<br>22 | 1 |
| GO:00070<br>95 | mitotic G2 DNA damage checkpoint                                       | 0.1096270<br>58 | 0.0868508<br>22 | 1 |
| GO:00108<br>69 | regulation of receptor biosynthetic process                            | 0.1096270<br>58 | 0.0868508<br>22 | 1 |
| GO:00148<br>50 | response to muscle activity                                            | 0.1096270<br>58 | 0.0868508<br>22 | 1 |
| GO:00328<br>91 | negative regulation of organic acid transport                          | 0.1096270<br>58 | 0.0868508<br>22 | 1 |
| GO:00336<br>22 | integrin activation                                                    | 0.1096270<br>58 | 0.0868508<br>22 | 1 |
| GO:00346<br>95 | response to prostaglandin E                                            | 0.1096270<br>58 | 0.0868508<br>22 | 1 |
| GO:00442<br>47 | cellular polysaccharide catabolic process                              | 0.1096270<br>58 | 0.0868508<br>22 | 1 |
| GO:00443<br>21 | response to leptin                                                     | 0.1096270<br>58 | 0.0868508<br>22 | 1 |
| GO:00443<br>46 | fibroblast apoptotic process                                           | 0.1096270<br>58 | 0.0868508<br>22 | 1 |
| GO:00445<br>50 | secondary metabolite biosynthetic process                              | 0.1096270<br>58 | 0.0868508<br>22 | 1 |
| GO:00458<br>21 | positive regulation of glycolytic process                              | 0.1096270<br>58 | 0.0868508<br>22 | 1 |
| GO:00466<br>28 | positive regulation of insulin receptor signaling pathway              | 0.1096270<br>58 | 0.0868508<br>22 | 1 |
| GO:00513<br>49 | positive regulation of lyase activity                                  | 0.1096270<br>58 | 0.0868508<br>22 | 1 |
| GO:00987<br>43 | cell aggregation                                                       | 0.1096270<br>58 | 0.0868508<br>22 | 1 |
| GO:19033<br>06 | negative regulation of regulated secretory pathway                     | 0.1096270<br>58 | 0.0868508<br>22 | 1 |
| GO:19034<br>29 | regulation of cell maturation                                          | 0.1096270<br>58 | 0.0868508<br>22 | 1 |
| GO:00328<br>86 | regulation of microtubule-based process                                | 0.1098807<br>22 | 0.0869375<br>93 | 1 |
| GO:00508<br>03 | regulation of synapse structure or activity                            | 0.1098807<br>22 | 0.0869375<br>93 | 1 |
| GO:00703<br>02 | regulation of stress-activated protein kinase signaling cascade        | 0.1098807<br>22 | 0.0869375<br>93 | 1 |

|                |                                                                            |                 |                 |   |
|----------------|----------------------------------------------------------------------------|-----------------|-----------------|---|
| GO:00512<br>09 | release of sequestered calcium ion into cytosol                            | 0.1110785<br>9  | 0.0878469<br>34 | 1 |
| GO:00456<br>66 | positive regulation of neuron differentiation                              | 0.1116234<br>35 | 0.0882392<br>61 | 1 |
| GO:19033<br>20 | regulation of protein modification by small protein conjugation or removal | 0.1119163<br>11 | 0.0884321<br>48 | 1 |
| GO:00511<br>53 | regulation of striated muscle cell differentiation                         | 0.1126373<br>75 | 0.0889242<br>43 | 1 |
| GO:00512<br>83 | negative regulation of sequestering of calcium ion                         | 0.1126373<br>75 | 0.0889242<br>43 | 1 |
| GO:00004<br>23 | mitophagy                                                                  | 0.1139272<br>35 | 0.0892803<br>53 | 1 |
| GO:00020<br>53 | positive regulation of mesenchymal cell proliferation                      | 0.1139272<br>35 | 0.0892803<br>53 | 1 |
| GO:00020<br>92 | positive regulation of receptor internalization                            | 0.1139272<br>35 | 0.0892803<br>53 | 1 |
| GO:00033<br>09 | type B pancreatic cell differentiation                                     | 0.1139272<br>35 | 0.0892803<br>53 | 1 |
| GO:00075<br>30 | sex determination                                                          | 0.1139272<br>35 | 0.0892803<br>53 | 1 |
| GO:00148<br>29 | vascular associated smooth muscle contraction                              | 0.1139272<br>35 | 0.0892803<br>53 | 1 |
| GO:00224<br>10 | circadian sleep/wake cycle process                                         | 0.1139272<br>35 | 0.0892803<br>53 | 1 |
| GO:00321<br>04 | regulation of response to extracellular stimulus                           | 0.1139272<br>35 | 0.0892803<br>53 | 1 |
| GO:00321<br>07 | regulation of response to nutrient levels                                  | 0.1139272<br>35 | 0.0892803<br>53 | 1 |
| GO:00456<br>62 | negative regulation of myoblast differentiation                            | 0.1139272<br>35 | 0.0892803<br>53 | 1 |
| GO:00466<br>97 | decidualization                                                            | 0.1139272<br>35 | 0.0892803<br>53 | 1 |
| GO:00508<br>57 | positive regulation of antigen receptor-mediated signaling pathway         | 0.1139272<br>35 | 0.0892803<br>53 | 1 |
| GO:00612<br>17 | regulation of mesonephros development                                      | 0.1139272<br>35 | 0.0892803<br>53 | 1 |
| GO:00614<br>36 | establishment of skin barrier                                              | 0.1139272<br>35 | 0.0892803<br>53 | 1 |
| GO:00716<br>77 | positive regulation of mononuclear cell migration                          | 0.1139272<br>35 | 0.0892803<br>53 | 1 |
| GO:19055<br>64 | positive regulation of vascular endothelial cell proliferation             | 0.1139272<br>35 | 0.0892803<br>53 | 1 |
| GO:20003<br>11 | regulation of AMPA receptor activity                                       | 0.1139272<br>35 | 0.0892803<br>53 | 1 |

|                |                                                                     |                 |                 |   |
|----------------|---------------------------------------------------------------------|-----------------|-----------------|---|
| GO:00515<br>88 | regulation of neurotransmitter transport                            | 0.1142019<br>06 | 0.0894568<br>59 | 1 |
| GO:00076<br>13 | memory                                                              | 0.1157720<br>95 | 0.0905692       | 1 |
| GO:00160<br>79 | synaptic vesicle exocytosis                                         | 0.1157720<br>95 | 0.0905692       | 1 |
| GO:00512<br>82 | regulation of sequestering of calcium ion                           | 0.1157720<br>95 | 0.0905692       | 1 |
| GO:00432<br>44 | regulation of protein-containing complex disassembly                | 0.1173478<br>51 | 0.0913288<br>74 | 1 |
| GO:19902<br>66 | neutrophil migration                                                | 0.1173478<br>51 | 0.0913288<br>74 | 1 |
| GO:00435<br>43 | protein acylation                                                   | 0.1181096<br>92 | 0.0913288<br>74 | 1 |
| GO:00002<br>72 | polysaccharide catabolic process                                    | 0.1182068<br>71 | 0.0913288<br>74 | 1 |
| GO:00017<br>83 | B cell apoptotic process                                            | 0.1182068<br>71 | 0.0913288<br>74 | 1 |
| GO:00019<br>45 | lymph vessel development                                            | 0.1182068<br>71 | 0.0913288<br>74 | 1 |
| GO:00022<br>27 | innate immune response in mucosa                                    | 0.1182068<br>71 | 0.0913288<br>74 | 1 |
| GO:00303<br>18 | melanocyte differentiation                                          | 0.1182068<br>71 | 0.0913288<br>74 | 1 |
| GO:00308<br>10 | positive regulation of nucleotide biosynthetic process              | 0.1182068<br>71 | 0.0913288<br>74 | 1 |
| GO:00316<br>64 | regulation of lipopolysaccharide-mediated signaling pathway         | 0.1182068<br>71 | 0.0913288<br>74 | 1 |
| GO:00332<br>33 | regulation of protein sumoylation                                   | 0.1182068<br>71 | 0.0913288<br>74 | 1 |
| GO:00341<br>14 | regulation of heterotypic cell-cell adhesion                        | 0.1182068<br>71 | 0.0913288<br>74 | 1 |
| GO:00421<br>04 | positive regulation of activated T cell proliferation               | 0.1182068<br>71 | 0.0913288<br>74 | 1 |
| GO:00427<br>30 | fibrinolysis                                                        | 0.1182068<br>71 | 0.0913288<br>74 | 1 |
| GO:00435<br>67 | regulation of insulin-like growth factor receptor signaling pathway | 0.1182068<br>71 | 0.0913288<br>74 | 1 |
| GO:00440<br>68 | modulation by symbiont of host cellular process                     | 0.1182068<br>71 | 0.0913288<br>74 | 1 |
| GO:00450<br>26 | plasma membrane fusion                                              | 0.1182068<br>71 | 0.0913288<br>74 | 1 |
| GO:00486<br>43 | positive regulation of skeletal muscle tissue development           | 0.1182068<br>71 | 0.0913288<br>74 | 1 |

|                |                                                                 |                 |                 |   |
|----------------|-----------------------------------------------------------------|-----------------|-----------------|---|
| GO:00511<br>56 | glucose 6-phosphate metabolic process                           | 0.1182068<br>71 | 0.0913288<br>74 | 1 |
| GO:00516<br>54 | establishment of mitochondrion localization                     | 0.1182068<br>71 | 0.0913288<br>74 | 1 |
| GO:00550<br>83 | monovalent inorganic anion homeostasis                          | 0.1182068<br>71 | 0.0913288<br>74 | 1 |
| GO:00603<br>43 | trabecula formation                                             | 0.1182068<br>71 | 0.0913288<br>74 | 1 |
| GO:00605<br>61 | apoptotic process involved in morphogenesis                     | 0.1182068<br>71 | 0.0913288<br>74 | 1 |
| GO:00607<br>06 | cell differentiation involved in embryonic placenta development | 0.1182068<br>71 | 0.0913288<br>74 | 1 |
| GO:00900<br>23 | positive regulation of neutrophil chemotaxis                    | 0.1182068<br>71 | 0.0913288<br>74 | 1 |
| GO:00970<br>66 | response to thyroid hormone                                     | 0.1182068<br>71 | 0.0913288<br>74 | 1 |
| GO:19003<br>73 | positive regulation of purine nucleotide biosynthetic process   | 0.1182068<br>71 | 0.0913288<br>74 | 1 |
| GO:19036<br>49 | regulation of cytoplasmic transport                             | 0.1182068<br>71 | 0.0913288<br>74 | 1 |
| GO:19055<br>23 | positive regulation of macrophage migration                     | 0.1182068<br>71 | 0.0913288<br>74 | 1 |
| GO:00319<br>29 | TOR signaling                                                   | 0.1205157<br>13 | 0.0929539<br>69 | 1 |
| GO:00460<br>31 | ADP metabolic process                                           | 0.1205157<br>13 | 0.0929539<br>69 | 1 |
| GO:00511<br>01 | regulation of DNA binding                                       | 0.1205157<br>13 | 0.0929539<br>69 | 1 |
| GO:00512<br>08 | sequestering of calcium ion                                     | 0.1205157<br>13 | 0.0929539<br>69 | 1 |
| GO:00028<br>33 | positive regulation of response to biotic stimulus              | 0.1212539<br>85 | 0.0934835<br>51 | 1 |
| GO:00018<br>38 | embryonic epithelial tube formation                             | 0.1221076<br>43 | 0.0936598<br>13 | 1 |
| GO:00030<br>14 | renal system process                                            | 0.1221076<br>43 | 0.0936598<br>13 | 1 |
| GO:00067<br>06 | steroid catabolic process                                       | 0.1224660<br>63 | 0.0936598<br>13 | 1 |
| GO:00080<br>53 | mitochondrial fusion                                            | 0.1224660<br>63 | 0.0936598<br>13 | 1 |
| GO:00090<br>65 | glutamine family amino acid catabolic process                   | 0.1224660<br>63 | 0.0936598<br>13 | 1 |
| GO:00181<br>26 | protein hydroxylation                                           | 0.1224660<br>63 | 0.0936598<br>13 | 1 |

|                |                                                                                   |                 |                 |   |
|----------------|-----------------------------------------------------------------------------------|-----------------|-----------------|---|
| GO:00319<br>54 | positive regulation of protein autophosphorylation                                | 0.1224660<br>63 | 0.0936598<br>13 | 1 |
| GO:00328<br>97 | negative regulation of viral transcription                                        | 0.1224660<br>63 | 0.0936598<br>13 | 1 |
| GO:00360<br>37 | CD8-positive, alpha-beta T cell activation                                        | 0.1224660<br>63 | 0.0936598<br>13 | 1 |
| GO:00509<br>96 | positive regulation of lipid catabolic process                                    | 0.1224660<br>63 | 0.0936598<br>13 | 1 |
| GO:00519<br>53 | negative regulation of amine transport                                            | 0.1224660<br>63 | 0.0936598<br>13 | 1 |
| GO:00605<br>44 | regulation of necroptotic process                                                 | 0.1224660<br>63 | 0.0936598<br>13 | 1 |
| GO:00620<br>98 | regulation of programmed necrotic cell death                                      | 0.1224660<br>63 | 0.0936598<br>13 | 1 |
| GO:00715<br>14 | genetic imprinting                                                                | 0.1224660<br>63 | 0.0936598<br>13 | 1 |
| GO:00725<br>39 | T-helper 17 cell differentiation                                                  | 0.1224660<br>63 | 0.0936598<br>13 | 1 |
| GO:00901<br>40 | regulation of mitochondrial fission                                               | 0.1224660<br>63 | 0.0936598<br>13 | 1 |
| GO:19000<br>78 | positive regulation of cellular response to insulin stimulus                      | 0.1224660<br>63 | 0.0936598<br>13 | 1 |
| GO:19001<br>20 | regulation of receptor binding                                                    | 0.1224660<br>63 | 0.0936598<br>13 | 1 |
| GO:19016<br>23 | regulation of lymphocyte chemotaxis                                               | 0.1224660<br>63 | 0.0936598<br>13 | 1 |
| GO:00302<br>17 | T cell differentiation                                                            | 0.1233673<br>93 | 0.0943092<br>74 | 1 |
| GO:00017<br>04 | formation of primary germ layer                                                   | 0.1253070<br>69 | 0.0954890<br>44 | 1 |
| GO:00140<br>66 | regulation of phosphatidylinositol 3-kinase signaling                             | 0.1253070<br>69 | 0.0954890<br>44 | 1 |
| GO:00510<br>53 | negative regulation of DNA metabolic process                                      | 0.1253070<br>69 | 0.0954890<br>44 | 1 |
| GO:19030<br>52 | positive regulation of proteolysis involved in cellular protein catabolic process | 0.1253070<br>69 | 0.0954890<br>44 | 1 |
| GO:00004<br>70 | maturation of LSU-rRNA                                                            | 0.1267049<br>07 | 0.0954890<br>44 | 1 |
| GO:00019<br>64 | startle response                                                                  | 0.1267049<br>07 | 0.0954890<br>44 | 1 |
| GO:00023<br>35 | mature B cell differentiation                                                     | 0.1267049<br>07 | 0.0954890<br>44 | 1 |
| GO:00031<br>80 | aortic valve morphogenesis                                                        | 0.1267049<br>07 | 0.0954890<br>44 | 1 |



|            |                                                                          |             |             |   |
|------------|--------------------------------------------------------------------------|-------------|-------------|---|
| GO:0006929 | substrate-dependent cell migration                                       | 0.126704907 | 0.095489044 | 1 |
| GO:0007205 | protein kinase C-activating G protein-coupled receptor signaling pathway | 0.126704907 | 0.095489044 | 1 |
| GO:0022011 | myelination in peripheral nervous system                                 | 0.126704907 | 0.095489044 | 1 |
| GO:0030194 | positive regulation of blood coagulation                                 | 0.126704907 | 0.095489044 | 1 |
| GO:0031069 | hair follicle morphogenesis                                              | 0.126704907 | 0.095489044 | 1 |
| GO:0031440 | regulation of mRNA 3'-end processing                                     | 0.126704907 | 0.095489044 | 1 |
| GO:0032292 | peripheral nervous system axon ensheathment                              | 0.126704907 | 0.095489044 | 1 |
| GO:0033561 | regulation of water loss via skin                                        | 0.126704907 | 0.095489044 | 1 |
| GO:0035883 | enteroendocrine cell differentiation                                     | 0.126704907 | 0.095489044 | 1 |
| GO:0042745 | circadian sleep/wake cycle                                               | 0.126704907 | 0.095489044 | 1 |
| GO:0044331 | cell-cell adhesion mediated by cadherin                                  | 0.126704907 | 0.095489044 | 1 |
| GO:0045745 | positive regulation of G protein-coupled receptor signaling pathway      | 0.126704907 | 0.095489044 | 1 |
| GO:0048753 | pigment granule organization                                             | 0.126704907 | 0.095489044 | 1 |
| GO:0060143 | positive regulation of syncytium formation by plasma membrane fusion     | 0.126704907 | 0.095489044 | 1 |
| GO:0071168 | protein localization to chromatin                                        | 0.126704907 | 0.095489044 | 1 |
| GO:0071280 | cellular response to copper ion                                          | 0.126704907 | 0.095489044 | 1 |
| GO:0086013 | membrane repolarization during cardiac muscle cell action potential      | 0.126704907 | 0.095489044 | 1 |
| GO:0099560 | synaptic membrane adhesion                                               | 0.126704907 | 0.095489044 | 1 |
| GO:1900048 | positive regulation of hemostasis                                        | 0.126704907 | 0.095489044 | 1 |
| GO:1900101 | regulation of endoplasmic reticulum unfolded protein response            | 0.126704907 | 0.095489044 | 1 |
| GO:1902932 | positive regulation of alcohol biosynthetic process                      | 0.126704907 | 0.095489044 | 1 |
| GO:1903579 | negative regulation of ATP metabolic process                             | 0.126704907 | 0.095489044 | 1 |

|                |                                                                      |                 |                 |   |
|----------------|----------------------------------------------------------------------|-----------------|-----------------|---|
| GO:19050<br>63 | regulation of vascular associated smooth muscle cell differentiation | 0.1267049<br>07 | 0.0954890<br>44 | 1 |
| GO:19055<br>63 | negative regulation of vascular endothelial cell proliferation       | 0.1267049<br>07 | 0.0954890<br>44 | 1 |
| GO:20001<br>91 | regulation of fatty acid transport                                   | 0.1267049<br>07 | 0.0954890<br>44 | 1 |
| GO:20004<br>63 | positive regulation of excitatory postsynaptic potential             | 0.1267049<br>07 | 0.0954890<br>44 | 1 |
| GO:00516<br>07 | defense response to virus                                            | 0.1287098<br>34 | 0.0969386<br>75 | 1 |
| GO:00091<br>50 | purine ribonucleotide metabolic process                              | 0.1287355<br>76 | 0.0969386<br>75 | 1 |
| GO:00421<br>80 | cellular ketone metabolic process                                    | 0.1308698<br>97 | 0.0979341<br>17 | 1 |
| GO:00082<br>09 | androgen metabolic process                                           | 0.1309235       | 0.0979341<br>17 | 1 |
| GO:00094<br>35 | NAD biosynthetic process                                             | 0.1309235       | 0.0979341<br>17 | 1 |
| GO:00323<br>73 | positive regulation of sterol transport                              | 0.1309235       | 0.0979341<br>17 | 1 |
| GO:00323<br>76 | positive regulation of cholesterol transport                         | 0.1309235       | 0.0979341<br>17 | 1 |
| GO:00330<br>32 | regulation of myeloid cell apoptotic process                         | 0.1309235       | 0.0979341<br>17 | 1 |
| GO:00362<br>96 | response to increased oxygen levels                                  | 0.1309235       | 0.0979341<br>17 | 1 |
| GO:00426<br>34 | regulation of hair cycle                                             | 0.1309235       | 0.0979341<br>17 | 1 |
| GO:00431<br>53 | entrainment of circadian clock by photoperiod                        | 0.1309235       | 0.0979341<br>17 | 1 |
| GO:00458<br>22 | negative regulation of heart contraction                             | 0.1309235       | 0.0979341<br>17 | 1 |
| GO:00508<br>20 | positive regulation of coagulation                                   | 0.1309235       | 0.0979341<br>17 | 1 |
| GO:00509<br>01 | leukocyte tethering or rolling                                       | 0.1309235       | 0.0979341<br>17 | 1 |
| GO:00550<br>75 | potassium ion homeostasis                                            | 0.1309235       | 0.0979341<br>17 | 1 |
| GO:00604<br>41 | epithelial tube branching involved in lung morphogenesis             | 0.1309235       | 0.0979341<br>17 | 1 |
| GO:00716<br>24 | positive regulation of granulocyte chemotaxis                        | 0.1309235       | 0.0979341<br>17 | 1 |
| GO:00801<br>54 | regulation of fertilization                                          | 0.1309235       | 0.0979341<br>17 | 1 |

|                |                                                                         |                 |                 |   |
|----------------|-------------------------------------------------------------------------|-----------------|-----------------|---|
| GO:00192<br>18 | regulation of steroid metabolic process                                 | 0.1317658<br>03 | 0.0984420<br>94 | 1 |
| GO:00324<br>34 | regulation of proteasomal ubiquitin-dependent protein catabolic process | 0.1317658<br>03 | 0.0984420<br>94 | 1 |
| GO:00456<br>67 | regulation of osteoblast differentiation                                | 0.1317658<br>03 | 0.0984420<br>94 | 1 |
| GO:00435<br>47 | positive regulation of GTPase activity                                  | 0.1329652<br>82 | 0.0992972<br>26 | 1 |
| GO:00614<br>48 | connective tissue development                                           | 0.1330428<br>79 | 0.0993141<br>86 | 1 |
| GO:00424<br>76 | odontogenesis                                                           | 0.1333924<br>74 | 0.0995340<br>91 | 1 |
| GO:00061<br>65 | nucleoside diphosphate phosphorylation                                  | 0.1350237<br>76 | 0.1000816<br>99 | 1 |
| GO:00069<br>97 | nucleus organization                                                    | 0.1350237<br>76 | 0.1000816<br>99 | 1 |
| GO:00421<br>77 | negative regulation of protein catabolic process                        | 0.1350237<br>76 | 0.1000816<br>99 | 1 |
| GO:00721<br>75 | epithelial tube formation                                               | 0.1350237<br>76 | 0.1000816<br>99 | 1 |
| GO:00034<br>01 | axis elongation                                                         | 0.1351219<br>38 | 0.1000816<br>99 | 1 |
| GO:00071<br>76 | regulation of epidermal growth factor-activated receptor activity       | 0.1351219<br>38 | 0.1000816<br>99 | 1 |
| GO:00105<br>86 | miRNA metabolic process                                                 | 0.1351219<br>38 | 0.1000816<br>99 | 1 |
| GO:00107<br>58 | regulation of macrophage chemotaxis                                     | 0.1351219<br>38 | 0.1000816<br>99 | 1 |
| GO:00190<br>98 | reproductive behavior                                                   | 0.1351219<br>38 | 0.1000816<br>99 | 1 |
| GO:00331<br>37 | negative regulation of peptidyl-serine phosphorylation                  | 0.1351219<br>38 | 0.1000816<br>99 | 1 |
| GO:00336<br>88 | regulation of osteoblast proliferation                                  | 0.1351219<br>38 | 0.1000816<br>99 | 1 |
| GO:00356<br>66 | TRIF-dependent toll-like receptor signaling pathway                     | 0.1351219<br>38 | 0.1000816<br>99 | 1 |
| GO:00482<br>65 | response to pain                                                        | 0.1351219<br>38 | 0.1000816<br>99 | 1 |
| GO:00601<br>42 | regulation of syncytium formation by plasma membrane fusion             | 0.1351219<br>38 | 0.1000816<br>99 | 1 |
| GO:00701<br>68 | negative regulation of biomineral tissue development                    | 0.1351219<br>38 | 0.1000816<br>99 | 1 |
| GO:00707<br>23 | response to cholesterol                                                 | 0.1351219<br>38 | 0.1000816<br>99 | 1 |

|                |                                                                                        |                 |                 |   |
|----------------|----------------------------------------------------------------------------------------|-----------------|-----------------|---|
| GO:01101<br>50 | negative regulation of biomineralization                                               | 0.1351219<br>38 | 0.1000816<br>99 | 1 |
| GO:01200<br>33 | negative regulation of plasma membrane bounded cell projection assembly                | 0.1351219<br>38 | 0.1000816<br>99 | 1 |
| GO:00713<br>33 | cellular response to glucose stimulus                                                  | 0.1366596<br>27 | 0.1011792<br>14 | 1 |
| GO:00091<br>65 | nucleotide biosynthetic process                                                        | 0.1374268<br>59 | 0.1017056<br>38 | 1 |
| GO:00469<br>39 | nucleotide phosphorylation                                                             | 0.1382999<br>47 | 0.1022681<br>3  | 1 |
| GO:00508<br>53 | B cell receptor signaling pathway                                                      | 0.1382999<br>47 | 0.1022681<br>3  | 1 |
| GO:00028<br>28 | regulation of type 2 immune response                                                   | 0.1393003<br>14 | 0.1023387<br>14 | 1 |
| GO:00091<br>54 | purine ribonucleotide catabolic process                                                | 0.1393003<br>14 | 0.1023387<br>14 | 1 |
| GO:00140<br>44 | Schwann cell development                                                               | 0.1393003<br>14 | 0.1023387<br>14 | 1 |
| GO:00343<br>68 | protein-lipid complex remodeling                                                       | 0.1393003<br>14 | 0.1023387<br>14 | 1 |
| GO:00343<br>69 | plasma lipoprotein particle remodeling                                                 | 0.1393003<br>14 | 0.1023387<br>14 | 1 |
| GO:00431<br>71 | peptide catabolic process                                                              | 0.1393003<br>14 | 0.1023387<br>14 | 1 |
| GO:00459<br>40 | positive regulation of steroid metabolic process                                       | 0.1393003<br>14 | 0.1023387<br>14 | 1 |
| GO:00487<br>10 | regulation of astrocyte differentiation                                                | 0.1393003<br>14 | 0.1023387<br>14 | 1 |
| GO:00702<br>29 | negative regulation of lymphocyte apoptotic process                                    | 0.1393003<br>14 | 0.1023387<br>14 | 1 |
| GO:00715<br>39 | protein localization to centrosome                                                     | 0.1393003<br>14 | 0.1023387<br>14 | 1 |
| GO:00715<br>49 | cellular response to dexamethasone stimulus                                            | 0.1393003<br>14 | 0.1023387<br>14 | 1 |
| GO:00725<br>38 | T-helper 17 type immune response                                                       | 0.1393003<br>14 | 0.1023387<br>14 | 1 |
| GO:19007<br>45 | positive regulation of p38MAPK cascade                                                 | 0.1393003<br>14 | 0.1023387<br>14 | 1 |
| GO:19022<br>30 | negative regulation of intrinsic apoptotic signaling pathway in response to DNA damage | 0.1393003<br>14 | 0.1023387<br>14 | 1 |
| GO:19026<br>24 | positive regulation of neutrophil migration                                            | 0.1393003<br>14 | 0.1023387<br>14 | 1 |
| GO:19037<br>92 | negative regulation of anion transport                                                 | 0.1393003<br>14 | 0.1023387<br>14 | 1 |

|                |                                                     |                 |                 |   |
|----------------|-----------------------------------------------------|-----------------|-----------------|---|
| GO:00091<br>35 | purine nucleoside diphosphate metabolic process     | 0.1399446<br>56 | 0.1026870<br>12 | 1 |
| GO:00091<br>79 | purine ribonucleoside diphosphate metabolic process | 0.1399446<br>56 | 0.1026870<br>12 | 1 |
| GO:00713<br>31 | cellular response to hexose stimulus                | 0.1399446<br>56 | 0.1026870<br>12 | 1 |
| GO:00064<br>01 | RNA catabolic process                               | 0.1407224<br>09 | 0.1031923<br>38 | 1 |
| GO:19012<br>93 | nucleoside phosphate biosynthetic process           | 0.1407473<br>86 | 0.1031923<br>38 | 1 |
| GO:00713<br>26 | cellular response to monosaccharide stimulus        | 0.1415936<br>75 | 0.1036880<br>91 | 1 |
| GO:19030<br>38 | negative regulation of leukocyte cell-cell adhesion | 0.1415936<br>75 | 0.1036880<br>91 | 1 |
| GO:00092<br>59 | ribonucleotide metabolic process                    | 0.1415954<br>68 | 0.1036880<br>91 | 1 |
| GO:00020<br>82 | regulation of oxidative phosphorylation             | 0.1434587<br>25 | 0.1040837<br>16 | 1 |
| GO:00027<br>24 | regulation of T cell cytokine production            | 0.1434587<br>25 | 0.1040837<br>16 | 1 |
| GO:00031<br>76 | aortic valve development                            | 0.1434587<br>25 | 0.1040837<br>16 | 1 |
| GO:00092<br>61 | ribonucleotide catabolic process                    | 0.1434587<br>25 | 0.1040837<br>16 | 1 |
| GO:00193<br>59 | nicotinamide nucleotide biosynthetic process        | 0.1434587<br>25 | 0.1040837<br>16 | 1 |
| GO:00193<br>63 | pyridine nucleotide biosynthetic process            | 0.1434587<br>25 | 0.1040837<br>16 | 1 |
| GO:00323<br>50 | regulation of hormone metabolic process             | 0.1434587<br>25 | 0.1040837<br>16 | 1 |
| GO:00343<br>67 | protein-containing complex remodeling               | 0.1434587<br>25 | 0.1040837<br>16 | 1 |
| GO:00346<br>94 | response to prostaglandin                           | 0.1434587<br>25 | 0.1040837<br>16 | 1 |
| GO:00381<br>28 | ERBB2 signaling pathway                             | 0.1434587<br>25 | 0.1040837<br>16 | 1 |
| GO:00427<br>44 | hydrogen peroxide catabolic process                 | 0.1434587<br>25 | 0.1040837<br>16 | 1 |
| GO:00448<br>18 | mitotic G2/M transition checkpoint                  | 0.1434587<br>25 | 0.1040837<br>16 | 1 |
| GO:00463<br>20 | regulation of fatty acid oxidation                  | 0.1434587<br>25 | 0.1040837<br>16 | 1 |
| GO:00469<br>49 | fatty-acyl-CoA biosynthetic process                 | 0.1434587<br>25 | 0.1040837<br>16 | 1 |

|                |                                                           |                 |                 |   |
|----------------|-----------------------------------------------------------|-----------------|-----------------|---|
| GO:00487<br>30 | epidermis morphogenesis                                   | 0.1434587<br>25 | 0.1040837<br>16 | 1 |
| GO:00487<br>41 | skeletal muscle fiber development                         | 0.1434587<br>25 | 0.1040837<br>16 | 1 |
| GO:00488<br>41 | regulation of axon extension involved in axon guidance    | 0.1434587<br>25 | 0.1040837<br>16 | 1 |
| GO:00508<br>49 | negative regulation of calcium-mediated signaling         | 0.1434587<br>25 | 0.1040837<br>16 | 1 |
| GO:00508<br>69 | negative regulation of B cell activation                  | 0.1434587<br>25 | 0.1040837<br>16 | 1 |
| GO:00610<br>36 | positive regulation of cartilage development              | 0.1434587<br>25 | 0.1040837<br>16 | 1 |
| GO:00713<br>53 | cellular response to interleukin-4                        | 0.1434587<br>25 | 0.1040837<br>16 | 1 |
| GO:19019<br>76 | regulation of cell cycle checkpoint                       | 0.1434587<br>25 | 0.1040837<br>16 | 1 |
| GO:19039<br>59 | regulation of anion transmembrane transport               | 0.1434587<br>25 | 0.1040837<br>16 | 1 |
| GO:00091<br>85 | ribonucleoside diphosphate metabolic process              | 0.1449043<br>29 | 0.1050904<br>09 | 1 |
| GO:00062<br>60 | DNA replication                                           | 0.1452169<br>63 | 0.1052749<br>49 | 1 |
| GO:00072<br>66 | Rho protein signal transduction                           | 0.1465658<br>09 | 0.1061499<br>87 | 1 |
| GO:00028<br>61 | regulation of inflammatory response to antigenic stimulus | 0.1475972<br>65 | 0.1061499<br>87 | 1 |
| GO:00093<br>03 | rRNA transcription                                        | 0.1475972<br>65 | 0.1061499<br>87 | 1 |
| GO:00096<br>48 | photoperiodism                                            | 0.1475972<br>65 | 0.1061499<br>87 | 1 |
| GO:00104<br>64 | regulation of mesenchymal cell proliferation              | 0.1475972<br>65 | 0.1061499<br>87 | 1 |
| GO:00301<br>49 | sphingolipid catabolic process                            | 0.1475972<br>65 | 0.1061499<br>87 | 1 |
| GO:00400<br>20 | regulation of meiotic nuclear division                    | 0.1475972<br>65 | 0.1061499<br>87 | 1 |
| GO:00425<br>73 | retinoic acid metabolic process                           | 0.1475972<br>65 | 0.1061499<br>87 | 1 |
| GO:00427<br>55 | eating behavior                                           | 0.1475972<br>65 | 0.1061499<br>87 | 1 |
| GO:00459<br>20 | negative regulation of exocytosis                         | 0.1475972<br>65 | 0.1061499<br>87 | 1 |
| GO:00480<br>11 | neurotrophin TRK receptor signaling pathway               | 0.1475972<br>65 | 0.1061499<br>87 | 1 |

|                |                                                                  |                 |                 |   |
|----------------|------------------------------------------------------------------|-----------------|-----------------|---|
| GO:00483<br>84 | retinoic acid receptor signaling pathway                         | 0.1475972<br>65 | 0.1061499<br>87 | 1 |
| GO:00506<br>85 | positive regulation of mRNA processing                           | 0.1475972<br>65 | 0.1061499<br>87 | 1 |
| GO:00519<br>84 | positive regulation of chromosome segregation                    | 0.1475972<br>65 | 0.1061499<br>87 | 1 |
| GO:00900<br>22 | regulation of neutrophil chemotaxis                              | 0.1475972<br>65 | 0.1061499<br>87 | 1 |
| GO:01202<br>55 | olefinic compound biosynthetic process                           | 0.1475972<br>65 | 0.1061499<br>87 | 1 |
| GO:19013<br>80 | negative regulation of potassium ion transmembrane transport     | 0.1475972<br>65 | 0.1061499<br>87 | 1 |
| GO:19017<br>97 | negative regulation of signal transduction by p53 class mediator | 0.1475972<br>65 | 0.1061499<br>87 | 1 |
| GO:19050<br>48 | regulation of metalloproteinase activity                         | 0.1475972<br>65 | 0.1061499<br>87 | 1 |
| GO:19055<br>08 | protein localization to microtubule organizing center            | 0.1475972<br>65 | 0.1061499<br>87 | 1 |
| GO:00300<br>10 | establishment of cell polarity                                   | 0.1482312<br>89 | 0.1065636<br>14 | 1 |
| GO:00464<br>25 | regulation of receptor signaling pathway via JAK-STAT            | 0.1499006<br>92 | 0.1076781<br>89 | 1 |
| GO:00720<br>73 | kidney epithelium development                                    | 0.1499006<br>92 | 0.1076781<br>89 | 1 |
| GO:00196<br>93 | ribose phosphate metabolic process                               | 0.1513417<br>89 | 0.1078264<br>57 | 1 |
| GO:00720<br>06 | nephron development                                              | 0.1515739<br>44 | 0.1078264<br>57 | 1 |
| GO:00018<br>81 | receptor recycling                                               | 0.1517160<br>27 | 0.1078264<br>57 | 1 |
| GO:00027<br>56 | MyD88-independent toll-like receptor signaling pathway           | 0.1517160<br>27 | 0.1078264<br>57 | 1 |
| GO:00070<br>94 | mitotic spindle assembly checkpoint                              | 0.1517160<br>27 | 0.1078264<br>57 | 1 |
| GO:00072<br>02 | activation of phospholipase C activity                           | 0.1517160<br>27 | 0.1078264<br>57 | 1 |
| GO:00081<br>56 | negative regulation of DNA replication                           | 0.1517160<br>27 | 0.1078264<br>57 | 1 |
| GO:00086<br>08 | attachment of spindle microtubules to kinetochore                | 0.1517160<br>27 | 0.1078264<br>57 | 1 |
| GO:00096<br>49 | entrainment of circadian clock                                   | 0.1517160<br>27 | 0.1078264<br>57 | 1 |
| GO:00107<br>62 | regulation of fibroblast migration                               | 0.1517160<br>27 | 0.1078264<br>57 | 1 |

|                |                                                                                            |                 |                 |   |
|----------------|--------------------------------------------------------------------------------------------|-----------------|-----------------|---|
| GO:00181<br>49 | peptide cross-linking                                                                      | 0.1517160<br>27 | 0.1078264<br>57 | 1 |
| GO:00192<br>28 | neuronal action potential                                                                  | 0.1517160<br>27 | 0.1078264<br>57 | 1 |
| GO:00308<br>51 | granulocyte differentiation                                                                | 0.1517160<br>27 | 0.1078264<br>57 | 1 |
| GO:00315<br>77 | spindle checkpoint                                                                         | 0.1517160<br>27 | 0.1078264<br>57 | 1 |
| GO:00331<br>98 | response to ATP                                                                            | 0.1517160<br>27 | 0.1078264<br>57 | 1 |
| GO:00357<br>74 | positive regulation of insulin secretion involved in cellular response to glucose stimulus | 0.1517160<br>27 | 0.1078264<br>57 | 1 |
| GO:00435<br>16 | regulation of DNA damage response, signal transduction by p53 class mediator               | 0.1517160<br>27 | 0.1078264<br>57 | 1 |
| GO:00466<br>85 | response to arsenic-containing substance                                                   | 0.1517160<br>27 | 0.1078264<br>57 | 1 |
| GO:00485<br>36 | spleen development                                                                         | 0.1517160<br>27 | 0.1078264<br>57 | 1 |
| GO:00488<br>54 | brain morphogenesis                                                                        | 0.1517160<br>27 | 0.1078264<br>57 | 1 |
| GO:00507<br>15 | positive regulation of cytokine secretion                                                  | 0.1517160<br>27 | 0.1078264<br>57 | 1 |
| GO:00550<br>94 | response to lipoprotein particle                                                           | 0.1517160<br>27 | 0.1078264<br>57 | 1 |
| GO:00613<br>84 | heart trabecula morphogenesis                                                              | 0.1517160<br>27 | 0.1078264<br>57 | 1 |
| GO:00701<br>02 | interleukin-6-mediated signaling pathway                                                   | 0.1517160<br>27 | 0.1078264<br>57 | 1 |
| GO:00711<br>73 | spindle assembly checkpoint                                                                | 0.1517160<br>27 | 0.1078264<br>57 | 1 |
| GO:00711<br>74 | mitotic spindle checkpoint                                                                 | 0.1517160<br>27 | 0.1078264<br>57 | 1 |
| GO:20003<br>52 | negative regulation of endothelial cell apoptotic process                                  | 0.1517160<br>27 | 0.1078264<br>57 | 1 |
| GO:00022<br>18 | activation of innate immune response                                                       | 0.1532509<br>7  | 0.1088318<br>67 | 1 |
| GO:00027<br>00 | regulation of production of molecular mediator of immune response                          | 0.1532509<br>7  | 0.1088318<br>67 | 1 |
| GO:00726<br>59 | protein localization to plasma membrane                                                    | 0.1542953<br>08 | 0.1095305<br>22 | 1 |
| GO:00713<br>22 | cellular response to carbohydrate stimulus                                                 | 0.1549316<br>95 | 0.1096064<br>92 | 1 |
| GO:00160<br>54 | organic acid catabolic process                                                             | 0.1554427<br>02 | 0.1096064<br>92 | 1 |



|                |                                                                              |                 |                 |   |
|----------------|------------------------------------------------------------------------------|-----------------|-----------------|---|
| GO:00463<br>95 | carboxylic acid catabolic process                                            | 0.1554427<br>02 | 0.1096064<br>92 | 1 |
| GO:00067<br>39 | NADP metabolic process                                                       | 0.1558151<br>05 | 0.1096064<br>92 | 1 |
| GO:00074<br>35 | salivary gland morphogenesis                                                 | 0.1558151<br>05 | 0.1096064<br>92 | 1 |
| GO:00102<br>59 | multicellular organism aging                                                 | 0.1558151<br>05 | 0.1096064<br>92 | 1 |
| GO:00149<br>04 | myotube cell development                                                     | 0.1558151<br>05 | 0.1096064<br>92 | 1 |
| GO:00193<br>62 | pyridine nucleotide metabolic process                                        | 0.1558151<br>05 | 0.1096064<br>92 | 1 |
| GO:00309<br>47 | regulation of vascular endothelial growth factor receptor signaling pathway  | 0.1558151<br>05 | 0.1096064<br>92 | 1 |
| GO:00322<br>28 | regulation of synaptic transmission, GABAergic                               | 0.1558151<br>05 | 0.1096064<br>92 | 1 |
| GO:00327<br>35 | positive regulation of interleukin-12 production                             | 0.1558151<br>05 | 0.1096064<br>92 | 1 |
| GO:00336<br>87 | osteoblast proliferation                                                     | 0.1558151<br>05 | 0.1096064<br>92 | 1 |
| GO:00363<br>14 | response to sterol                                                           | 0.1558151<br>05 | 0.1096064<br>92 | 1 |
| GO:00396<br>94 | viral RNA genome replication                                                 | 0.1558151<br>05 | 0.1096064<br>92 | 1 |
| GO:00424<br>62 | eye photoreceptor cell development                                           | 0.1558151<br>05 | 0.1096064<br>92 | 1 |
| GO:00459<br>22 | negative regulation of fatty acid metabolic process                          | 0.1558151<br>05 | 0.1096064<br>92 | 1 |
| GO:00464<br>96 | nicotinamide nucleotide metabolic process                                    | 0.1558151<br>05 | 0.1096064<br>92 | 1 |
| GO:00703<br>06 | lens fiber cell differentiation                                              | 0.1558151<br>05 | 0.1096064<br>92 | 1 |
| GO:00706<br>70 | response to interleukin-4                                                    | 0.1558151<br>05 | 0.1096064<br>92 | 1 |
| GO:00725<br>25 | pyridine-containing compound biosynthetic process                            | 0.1558151<br>05 | 0.1096064<br>92 | 1 |
| GO:19000<br>16 | negative regulation of cytokine production involved in inflammatory response | 0.1558151<br>05 | 0.1096064<br>92 | 1 |
| GO:19010<br>20 | negative regulation of calcium ion transmembrane transporter activity        | 0.1558151<br>05 | 0.1096064<br>92 | 1 |
| GO:19012<br>23 | negative regulation of NIK/NF-kappaB signaling                               | 0.1558151<br>05 | 0.1096064<br>92 | 1 |
| GO:00516<br>56 | establishment of organelle localization                                      | 0.1558560<br>95 | 0.1096064<br>92 | 1 |

|                |                                                                            |                 |                 |   |
|----------------|----------------------------------------------------------------------------|-----------------|-----------------|---|
| GO:00443<br>44 | cellular response to fibroblast growth factor stimulus                     | 0.1566160<br>46 | 0.1100126<br>61 | 1 |
| GO:00466<br>31 | alpha-beta T cell activation                                               | 0.1566160<br>46 | 0.1100126<br>61 | 1 |
| GO:00488<br>13 | dendrite morphogenesis                                                     | 0.1566160<br>46 | 0.1100126<br>61 | 1 |
| GO:00508<br>08 | synapse organization                                                       | 0.1567650<br>94 | 0.1100746<br>26 | 1 |
| GO:00070<br>43 | cell-cell junction assembly                                                | 0.1583039<br>5  | 0.1110689<br>54 | 1 |
| GO:00464<br>67 | membrane lipid biosynthetic process                                        | 0.1583039<br>5  | 0.1110689<br>54 | 1 |
| GO:00004<br>60 | maturation of 5.8S rRNA                                                    | 0.1598945<br>93 | 0.1116654<br>02 | 1 |
| GO:00027<br>01 | negative regulation of production of molecular mediator of immune response | 0.1598945<br>93 | 0.1116654<br>02 | 1 |
| GO:00033<br>82 | epithelial cell morphogenesis                                              | 0.1598945<br>93 | 0.1116654<br>02 | 1 |
| GO:00060<br>07 | glucose catabolic process                                                  | 0.1598945<br>93 | 0.1116654<br>02 | 1 |
| GO:00100<br>92 | specification of animal organ identity                                     | 0.1598945<br>93 | 0.1116654<br>02 | 1 |
| GO:00311<br>28 | developmental induction                                                    | 0.1598945<br>93 | 0.1116654<br>02 | 1 |
| GO:00332<br>80 | response to vitamin D                                                      | 0.1598945<br>93 | 0.1116654<br>02 | 1 |
| GO:00458<br>41 | negative regulation of mitotic metaphase/anaphase transition               | 0.1598945<br>93 | 0.1116654<br>02 | 1 |
| GO:00466<br>76 | negative regulation of insulin secretion                                   | 0.1598945<br>93 | 0.1116654<br>02 | 1 |
| GO:00509<br>31 | pigment cell differentiation                                               | 0.1598945<br>93 | 0.1116654<br>02 | 1 |
| GO:00714<br>02 | cellular response to lipoprotein particle stimulus                         | 0.1598945<br>93 | 0.1116654<br>02 | 1 |
| GO:19013<br>85 | regulation of voltage-gated calcium channel activity                       | 0.1598945<br>93 | 0.1116654<br>02 | 1 |
| GO:00316<br>44 | regulation of nervous system process                                       | 0.1599953<br>35 | 0.1116926<br>5  | 1 |
| GO:00061<br>19 | oxidative phosphorylation                                                  | 0.1616901<br>29 | 0.1127887<br>56 | 1 |
| GO:19033<br>64 | positive regulation of cellular protein catabolic process                  | 0.1616901<br>29 | 0.1127887<br>56 | 1 |
| GO:00302<br>12 | hyaluronan metabolic process                                               | 0.1639545<br>82 | 0.1140167<br>18 | 1 |

|                |                                                                          |                 |                 |   |
|----------------|--------------------------------------------------------------------------|-----------------|-----------------|---|
| GO:00457<br>30 | respiratory burst                                                        | 0.1639545<br>82 | 0.1140167<br>18 | 1 |
| GO:00488<br>46 | axon extension involved in axon guidance                                 | 0.1639545<br>82 | 0.1140167<br>18 | 1 |
| GO:00972<br>42 | amyloid-beta clearance                                                   | 0.1639545<br>82 | 0.1140167<br>18 | 1 |
| GO:19021<br>00 | negative regulation of metaphase/anaphase transition of cell cycle       | 0.1639545<br>82 | 0.1140167<br>18 | 1 |
| GO:19022<br>84 | neuron projection extension involved in neuron projection guidance       | 0.1639545<br>82 | 0.1140167<br>18 | 1 |
| GO:19035<br>14 | release of sequestered calcium ion into cytosol by endoplasmic reticulum | 0.1639545<br>82 | 0.1140167<br>18 | 1 |
| GO:19053<br>14 | semi-lunar valve development                                             | 0.1639545<br>82 | 0.1140167<br>18 | 1 |
| GO:19048<br>92 | regulation of receptor signaling pathway via STAT                        | 0.1650896<br>61 | 0.1147619<br>66 | 1 |
| GO:00022<br>24 | toll-like receptor signaling pathway                                     | 0.1667942<br>59 | 0.1158578<br>97 | 1 |
| GO:00060<br>90 | pyruvate metabolic process                                               | 0.1667942<br>59 | 0.1158578<br>97 | 1 |
| GO:00023<br>85 | mucosal immune response                                                  | 0.1679951<br>64 | 0.1160682<br>81 | 1 |
| GO:00031<br>56 | regulation of animal organ formation                                     | 0.1679951<br>64 | 0.1160682<br>81 | 1 |
| GO:00032<br>98 | physiological muscle hypertrophy                                         | 0.1679951<br>64 | 0.1160682<br>81 | 1 |
| GO:00033<br>01 | physiological cardiac muscle hypertrophy                                 | 0.1679951<br>64 | 0.1160682<br>81 | 1 |
| GO:00060<br>84 | acetyl-CoA metabolic process                                             | 0.1679951<br>64 | 0.1160682<br>81 | 1 |
| GO:00072<br>23 | Wnt signaling pathway, calcium modulating pathway                        | 0.1679951<br>64 | 0.1160682<br>81 | 1 |
| GO:00106<br>61 | positive regulation of muscle cell apoptotic process                     | 0.1679951<br>64 | 0.1160682<br>81 | 1 |
| GO:00327<br>33 | positive regulation of interleukin-10 production                         | 0.1679951<br>64 | 0.1160682<br>81 | 1 |
| GO:00459<br>23 | positive regulation of fatty acid metabolic process                      | 0.1679951<br>64 | 0.1160682<br>81 | 1 |
| GO:00464<br>66 | membrane lipid catabolic process                                         | 0.1679951<br>64 | 0.1160682<br>81 | 1 |
| GO:00519<br>30 | regulation of sensory perception of pain                                 | 0.1679951<br>64 | 0.1160682<br>81 | 1 |
| GO:00610<br>49 | cell growth involved in cardiac muscle cell development                  | 0.1679951<br>64 | 0.1160682<br>81 | 1 |

|                |                                                                                                                                         |                 |                 |   |
|----------------|-----------------------------------------------------------------------------------------------------------------------------------------|-----------------|-----------------|---|
| GO:19035<br>23 | negative regulation of blood circulation                                                                                                | 0.1679951<br>64 | 0.1160682<br>81 | 1 |
| GO:19058<br>98 | positive regulation of response to endoplasmic reticulum stress                                                                         | 0.1679951<br>64 | 0.1160682<br>81 | 1 |
| GO:00016<br>78 | cellular glucose homeostasis                                                                                                            | 0.1685019<br>84 | 0.1162852<br>43 | 1 |
| GO:00028<br>22 | regulation of adaptive immune response based on somatic recombination of immune receptors built from immunoglobulin superfamily domains | 0.1685019<br>84 | 0.1162852<br>43 | 1 |
| GO:00717<br>74 | response to fibroblast growth factor                                                                                                    | 0.1685019<br>84 | 0.1162852<br>43 | 1 |
| GO:00027<br>06 | regulation of lymphocyte mediated immunity                                                                                              | 0.1702127<br>7  | 0.1174210<br>93 | 1 |
| GO:00091<br>32 | nucleoside diphosphate metabolic process                                                                                                | 0.1719265<br>46 | 0.1179012<br>15 | 1 |
| GO:00016<br>62 | behavioral fear response                                                                                                                | 0.1720164<br>33 | 0.1179012<br>15 | 1 |
| GO:00066<br>56 | phosphatidylcholine biosynthetic process                                                                                                | 0.1720164<br>33 | 0.1179012<br>15 | 1 |
| GO:00067<br>78 | porphyrin-containing compound metabolic process                                                                                         | 0.1720164<br>33 | 0.1179012<br>15 | 1 |
| GO:00074<br>31 | salivary gland development                                                                                                              | 0.1720164<br>33 | 0.1179012<br>15 | 1 |
| GO:00104<br>53 | regulation of cell fate commitment                                                                                                      | 0.1720164<br>33 | 0.1179012<br>15 | 1 |
| GO:00308<br>66 | cortical actin cytoskeleton organization                                                                                                | 0.1720164<br>33 | 0.1179012<br>15 | 1 |
| GO:00311<br>11 | negative regulation of microtubule polymerization or depolymerization                                                                   | 0.1720164<br>33 | 0.1179012<br>15 | 1 |
| GO:00326<br>60 | regulation of interleukin-17 production                                                                                                 | 0.1720164<br>33 | 0.1179012<br>15 | 1 |
| GO:00381<br>79 | neurotrophin signaling pathway                                                                                                          | 0.1720164<br>33 | 0.1179012<br>15 | 1 |
| GO:00420<br>92 | type 2 immune response                                                                                                                  | 0.1720164<br>33 | 0.1179012<br>15 | 1 |
| GO:00463<br>29 | negative regulation of JNK cascade                                                                                                      | 0.1720164<br>33 | 0.1179012<br>15 | 1 |
| GO:00519<br>31 | regulation of sensory perception                                                                                                        | 0.1720164<br>33 | 0.1179012<br>15 | 1 |
| GO:19010<br>21 | positive regulation of calcium ion transmembrane transporter activity                                                                   | 0.1720164<br>33 | 0.1179012<br>15 | 1 |
| GO:19022<br>29 | regulation of intrinsic apoptotic signaling pathway in response to DNA damage                                                           | 0.1720164<br>33 | 0.1179012<br>15 | 1 |
| GO:19047<br>06 | negative regulation of vascular associated smooth muscle cell proliferation                                                             | 0.1720164<br>33 | 0.1179012<br>15 | 1 |

|                |                                                                        |                 |                 |   |
|----------------|------------------------------------------------------------------------|-----------------|-----------------|---|
| GO:20008<br>16 | negative regulation of mitotic sister chromatid separation             | 0.1720164<br>33 | 0.1179012<br>15 | 1 |
| GO:00001<br>87 | activation of MAPK activity                                            | 0.1736432<br>47 | 0.1189261<br>49 | 1 |
| GO:19029<br>04 | negative regulation of supramolecular fiber organization               | 0.1736432<br>47 | 0.1189261<br>49 | 1 |
| GO:00442<br>82 | small molecule catabolic process                                       | 0.1744082<br>11 | 0.1194048<br>69 | 1 |
| GO:00107<br>70 | positive regulation of cell morphogenesis involved in differentiation  | 0.1753628<br>04 | 0.1197371<br>44 | 1 |
| GO:00022<br>09 | behavioral defense response                                            | 0.1760184<br>78 | 0.1197371<br>44 | 1 |
| GO:00027<br>14 | positive regulation of B cell mediated immunity                        | 0.1760184<br>78 | 0.1197371<br>44 | 1 |
| GO:00028<br>91 | positive regulation of immunoglobulin mediated immune response         | 0.1760184<br>78 | 0.1197371<br>44 | 1 |
| GO:00091<br>87 | cyclic nucleotide metabolic process                                    | 0.1760184<br>78 | 0.1197371<br>44 | 1 |
| GO:00109<br>39 | regulation of necrotic cell death                                      | 0.1760184<br>78 | 0.1197371<br>44 | 1 |
| GO:00305<br>01 | positive regulation of bone mineralization                             | 0.1760184<br>78 | 0.1197371<br>44 | 1 |
| GO:00457<br>40 | positive regulation of DNA replication                                 | 0.1760184<br>78 | 0.1197371<br>44 | 1 |
| GO:00457<br>46 | negative regulation of Notch signaling pathway                         | 0.1760184<br>78 | 0.1197371<br>44 | 1 |
| GO:00508<br>92 | intestinal absorption                                                  | 0.1760184<br>78 | 0.1197371<br>44 | 1 |
| GO:00512<br>81 | positive regulation of release of sequestered calcium ion into cytosol | 0.1760184<br>78 | 0.1197371<br>44 | 1 |
| GO:00901<br>84 | positive regulation of kidney development                              | 0.1760184<br>78 | 0.1197371<br>44 | 1 |
| GO:00973<br>52 | autophagosome maturation                                               | 0.1760184<br>78 | 0.1197371<br>44 | 1 |
| GO:01403<br>53 | lipid export from cell                                                 | 0.1760184<br>78 | 0.1197371<br>44 | 1 |
| GO:19013<br>81 | positive regulation of potassium ion transmembrane transport           | 0.1760184<br>78 | 0.1197371<br>44 | 1 |
| GO:19027<br>42 | apoptotic process involved in development                              | 0.1760184<br>78 | 0.1197371<br>44 | 1 |
| GO:19058<br>19 | negative regulation of chromosome separation                           | 0.1760184<br>78 | 0.1197371<br>44 | 1 |
| GO:00165<br>73 | histone acetylation                                                    | 0.1788102<br>24 | 0.1214992<br>09 | 1 |

|                |                                                             |                 |                 |   |
|----------------|-------------------------------------------------------------|-----------------|-----------------|---|
| GO:00326<br>75 | regulation of interleukin-6 production                      | 0.1788102<br>24 | 0.1214992<br>09 | 1 |
| GO:20000<br>58 | regulation of ubiquitin-dependent protein catabolic process | 0.1788102<br>24 | 0.1214992<br>09 | 1 |
| GO:00067<br>34 | NADH metabolic process                                      | 0.1800013<br>91 | 0.1218054<br>52 | 1 |
| GO:00335<br>74 | response to testosterone                                    | 0.1800013<br>91 | 0.1218054<br>52 | 1 |
| GO:00353<br>37 | fatty-acyl-CoA metabolic process                            | 0.1800013<br>91 | 0.1218054<br>52 | 1 |
| GO:00432<br>67 | negative regulation of potassium ion transport              | 0.1800013<br>91 | 0.1218054<br>52 | 1 |
| GO:00482<br>86 | lung alveolus development                                   | 0.1800013<br>91 | 0.1218054<br>52 | 1 |
| GO:00504<br>34 | positive regulation of viral transcription                  | 0.1800013<br>91 | 0.1218054<br>52 | 1 |
| GO:00508<br>32 | defense response to fungus                                  | 0.1800013<br>91 | 0.1218054<br>52 | 1 |
| GO:00703<br>17 | negative regulation of G0 to G1 transition                  | 0.1800013<br>91 | 0.1218054<br>52 | 1 |
| GO:00715<br>48 | response to dexamethasone                                   | 0.1800013<br>91 | 0.1218054<br>52 | 1 |
| GO:00725<br>24 | pyridine-containing compound metabolic process              | 0.1800013<br>91 | 0.1218054<br>52 | 1 |
| GO:19031<br>70 | negative regulation of calcium ion transmembrane transport  | 0.1800013<br>91 | 0.1218054<br>52 | 1 |
| GO:00109<br>70 | transport along microtubule                                 | 0.1822682<br>8  | 0.1232933<br>3  | 1 |
| GO:00002<br>66 | mitochondrial fission                                       | 0.1839652<br>62 | 0.1239096<br>44 | 1 |
| GO:00017<br>09 | cell fate determination                                     | 0.1839652<br>62 | 0.1239096<br>44 | 1 |
| GO:00219<br>83 | pituitary gland development                                 | 0.1839652<br>62 | 0.1239096<br>44 | 1 |
| GO:00330<br>48 | negative regulation of mitotic sister chromatid segregation | 0.1839652<br>62 | 0.1239096<br>44 | 1 |
| GO:00440<br>58 | regulation of digestive system process                      | 0.1839652<br>62 | 0.1239096<br>44 | 1 |
| GO:00466<br>21 | negative regulation of organ growth                         | 0.1839652<br>62 | 0.1239096<br>44 | 1 |
| GO:00725<br>95 | maintenance of protein localization in organelle            | 0.1839652<br>62 | 0.1239096<br>44 | 1 |
| GO:00902<br>78 | negative regulation of peptide hormone secretion            | 0.1839652<br>62 | 0.1239096<br>44 | 1 |

|                |                                                       |                 |                 |   |
|----------------|-------------------------------------------------------|-----------------|-----------------|---|
| GO:00902<br>79 | regulation of calcium ion import                      | 0.1839652<br>62 | 0.1239096<br>44 | 1 |
| GO:19003<br>71 | regulation of purine nucleotide biosynthetic process  | 0.1839652<br>62 | 0.1239096<br>44 | 1 |
| GO:19026<br>22 | regulation of neutrophil migration                    | 0.1839652<br>62 | 0.1239096<br>44 | 1 |
| GO:00073<br>38 | single fertilization                                  | 0.1840011<br>36 | 0.1239096<br>44 | 1 |
| GO:00219<br>15 | neural tube development                               | 0.1857364<br>58 | 0.1249852<br>11 | 1 |
| GO:00514<br>94 | negative regulation of cytoskeleton organization      | 0.1857364<br>58 | 0.1249852<br>11 | 1 |
| GO:00017<br>64 | neuron migration                                      | 0.1874741<br>82 | 0.1256071<br>4  | 1 |
| GO:00183<br>93 | internal peptidyl-lysine acetylation                  | 0.1874741<br>82 | 0.1256071<br>4  | 1 |
| GO:00461<br>65 | alcohol biosynthetic process                          | 0.1874741<br>82 | 0.1256071<br>4  | 1 |
| GO:00019<br>53 | negative regulation of cell-matrix adhesion           | 0.1879101<br>81 | 0.1256071<br>4  | 1 |
| GO:00023<br>69 | T cell cytokine production                            | 0.1879101<br>81 | 0.1256071<br>4  | 1 |
| GO:00171<br>58 | regulation of calcium ion-dependent exocytosis        | 0.1879101<br>81 | 0.1256071<br>4  | 1 |
| GO:00217<br>62 | substantia nigra development                          | 0.1879101<br>81 | 0.1256071<br>4  | 1 |
| GO:00305<br>17 | negative regulation of axon extension                 | 0.1879101<br>81 | 0.1256071<br>4  | 1 |
| GO:00305<br>21 | androgen receptor signaling pathway                   | 0.1879101<br>81 | 0.1256071<br>4  | 1 |
| GO:00308<br>08 | regulation of nucleotide biosynthetic process         | 0.1879101<br>81 | 0.1256071<br>4  | 1 |
| GO:00400<br>19 | positive regulation of embryonic development          | 0.1879101<br>81 | 0.1256071<br>4  | 1 |
| GO:00466<br>88 | response to copper ion                                | 0.1879101<br>81 | 0.1256071<br>4  | 1 |
| GO:00467<br>17 | acid secretion                                        | 0.1879101<br>81 | 0.1256071<br>4  | 1 |
| GO:00508<br>50 | positive regulation of calcium-mediated signaling     | 0.1879101<br>81 | 0.1256071<br>4  | 1 |
| GO:00508<br>56 | regulation of T cell receptor signaling pathway       | 0.1879101<br>81 | 0.1256071<br>4  | 1 |
| GO:00713<br>64 | cellular response to epidermal growth factor stimulus | 0.1879101<br>81 | 0.1256071<br>4  | 1 |

|                |                                                     |                 |                 |   |
|----------------|-----------------------------------------------------|-----------------|-----------------|---|
| GO:00860<br>04 | regulation of cardiac muscle cell contraction       | 0.1879101<br>81 | 0.1256071<br>4  | 1 |
| GO:19010<br>31 | regulation of response to reactive oxygen species   | 0.1879101<br>81 | 0.1256071<br>4  | 1 |
| GO:00064<br>75 | internal protein amino acid acetylation             | 0.1909565<br>92 | 0.1274780<br>11 | 1 |
| GO:00061<br>95 | purine nucleotide catabolic process                 | 0.1918362<br>38 | 0.1274780<br>11 | 1 |
| GO:00104<br>63 | mesenchymal cell proliferation                      | 0.1918362<br>38 | 0.1274780<br>11 | 1 |
| GO:00316<br>70 | cellular response to nutrient                       | 0.1918362<br>38 | 0.1274780<br>11 | 1 |
| GO:00326<br>20 | interleukin-17 production                           | 0.1918362<br>38 | 0.1274780<br>11 | 1 |
| GO:00329<br>65 | regulation of collagen biosynthetic process         | 0.1918362<br>38 | 0.1274780<br>11 | 1 |
| GO:00330<br>46 | negative regulation of sister chromatid segregation | 0.1918362<br>38 | 0.1274780<br>11 | 1 |
| GO:00353<br>07 | positive regulation of protein dephosphorylation    | 0.1918362<br>38 | 0.1274780<br>11 | 1 |
| GO:00453<br>32 | phospholipid translocation                          | 0.1918362<br>38 | 0.1274780<br>11 | 1 |
| GO:00456<br>84 | positive regulation of epidermis development        | 0.1918362<br>38 | 0.1274780<br>11 | 1 |
| GO:00456<br>87 | positive regulation of glial cell differentiation   | 0.1918362<br>38 | 0.1274780<br>11 | 1 |
| GO:00484<br>89 | synaptic vesicle transport                          | 0.1918362<br>38 | 0.1274780<br>11 | 1 |
| GO:19026<br>67 | regulation of axon guidance                         | 0.1918362<br>38 | 0.1274780<br>11 | 1 |
| GO:19030<br>53 | regulation of extracellular matrix organization     | 0.1918362<br>38 | 0.1274780<br>11 | 1 |
| GO:19055<br>21 | regulation of macrophage migration                  | 0.1918362<br>38 | 0.1274780<br>11 | 1 |
| GO:20004<br>04 | regulation of T cell migration                      | 0.1918362<br>38 | 0.1274780<br>11 | 1 |
| GO:00903<br>05 | nucleic acid phosphodiester bond hydrolysis         | 0.1922498<br>47 | 0.1277059<br>61 | 1 |
| GO:00028<br>19 | regulation of adaptive immune response              | 0.1944478<br>7  | 0.1291186<br>44 | 1 |
| GO:00019<br>74 | blood vessel remodeling                             | 0.1957435<br>23 | 0.1294091<br>17 | 1 |
| GO:00026<br>39 | positive regulation of immunoglobulin production    | 0.1957435<br>23 | 0.1294091<br>17 | 1 |



|                |                                                                |                 |                 |   |
|----------------|----------------------------------------------------------------|-----------------|-----------------|---|
| GO:00067<br>75 | fat-soluble vitamin metabolic process                          | 0.1957435<br>23 | 0.1294091<br>17 | 1 |
| GO:00075<br>20 | myoblast fusion                                                | 0.1957435<br>23 | 0.1294091<br>17 | 1 |
| GO:00106<br>77 | negative regulation of cellular carbohydrate metabolic process | 0.1957435<br>23 | 0.1294091<br>17 | 1 |
| GO:00341<br>98 | cellular response to amino acid starvation                     | 0.1957435<br>23 | 0.1294091<br>17 | 1 |
| GO:00461<br>89 | phenol-containing compound biosynthetic process                | 0.1957435<br>23 | 0.1294091<br>17 | 1 |
| GO:00519<br>85 | negative regulation of chromosome segregation                  | 0.1957435<br>23 | 0.1294091<br>17 | 1 |
| GO:00523<br>72 | modulation by symbiont of entry into host                      | 0.1957435<br>23 | 0.1294091<br>17 | 1 |
| GO:00604<br>12 | ventricular septum morphogenesis                               | 0.1957435<br>23 | 0.1294091<br>17 | 1 |
| GO:00703<br>16 | regulation of G0 to G1 transition                              | 0.1957435<br>23 | 0.1294091<br>17 | 1 |
| GO:00988<br>15 | modulation of excitatory postsynaptic potential                | 0.1957435<br>23 | 0.1294091<br>17 | 1 |
| GO:00328<br>74 | positive regulation of stress-activated MAPK cascade           | 0.1979475<br>3  | 0.1308184<br>25 | 1 |
| GO:00017<br>54 | eye photoreceptor cell differentiation                         | 0.1996321<br>22 | 0.1314009<br>22 | 1 |
| GO:00107<br>61 | fibroblast migration                                           | 0.1996321<br>22 | 0.1314009<br>22 | 1 |
| GO:00108<br>74 | regulation of cholesterol efflux                               | 0.1996321<br>22 | 0.1314009<br>22 | 1 |
| GO:00316<br>41 | regulation of myelination                                      | 0.1996321<br>22 | 0.1314009<br>22 | 1 |
| GO:00320<br>07 | negative regulation of TOR signaling                           | 0.1996321<br>22 | 0.1314009<br>22 | 1 |
| GO:00323<br>09 | icosanoid secretion                                            | 0.1996321<br>22 | 0.1314009<br>22 | 1 |
| GO:00450<br>23 | G0 to G1 transition                                            | 0.1996321<br>22 | 0.1314009<br>22 | 1 |
| GO:00485<br>38 | thymus development                                             | 0.1996321<br>22 | 0.1314009<br>22 | 1 |
| GO:00514<br>89 | regulation of filopodium assembly                              | 0.1996321<br>22 | 0.1314009<br>22 | 1 |
| GO:00516<br>46 | mitochondrion localization                                     | 0.1996321<br>22 | 0.1314009<br>22 | 1 |
| GO:19007<br>44 | regulation of p38MAPK cascade                                  | 0.1996321<br>22 | 0.1314009<br>22 | 1 |

|            |                                                                          |             |             |   |
|------------|--------------------------------------------------------------------------|-------------|-------------|---|
| GO:0051302 | regulation of cell division                                              | 0.199700354 | 0.131400922 | 1 |
| GO:0018394 | peptidyl-lysine acetylation                                              | 0.201455095 | 0.132459191 | 1 |
| GO:0070304 | positive regulation of stress-activated protein kinase signaling cascade | 0.201455095 | 0.132459191 | 1 |
| GO:0002429 | immune response-activating cell surface receptor signaling pathway       | 0.202578942 | 0.132983656 | 1 |
| GO:0002757 | immune response-activating signal transduction                           | 0.202578942 | 0.132983656 | 1 |
| GO:0043087 | regulation of GTPase activity                                            | 0.202578942 | 0.132983656 | 1 |
| GO:0006383 | transcription by RNA polymerase III                                      | 0.203502127 | 0.132983656 | 1 |
| GO:0007080 | mitotic metaphase plate congression                                      | 0.203502127 | 0.132983656 | 1 |
| GO:0008542 | visual learning                                                          | 0.203502127 | 0.132983656 | 1 |
| GO:0010559 | regulation of glycoprotein biosynthetic process                          | 0.203502127 | 0.132983656 | 1 |
| GO:0010569 | regulation of double-strand break repair via homologous recombination    | 0.203502127 | 0.132983656 | 1 |
| GO:0030261 | chromosome condensation                                                  | 0.203502127 | 0.132983656 | 1 |
| GO:0032369 | negative regulation of lipid transport                                   | 0.203502127 | 0.132983656 | 1 |
| GO:0034204 | lipid translocation                                                      | 0.203502127 | 0.132983656 | 1 |
| GO:0035850 | epithelial cell differentiation involved in kidney development           | 0.203502127 | 0.132983656 | 1 |
| GO:0042551 | neuron maturation                                                        | 0.203502127 | 0.132983656 | 1 |
| GO:0048483 | autonomic nervous system development                                     | 0.203502127 | 0.132983656 | 1 |
| GO:0051150 | regulation of smooth muscle cell differentiation                         | 0.203502127 | 0.132983656 | 1 |
| GO:0070849 | response to epidermal growth factor                                      | 0.203502127 | 0.132983656 | 1 |
| GO:1903115 | regulation of actin filament-based movement                              | 0.203502127 | 0.132983656 | 1 |
| GO:0007269 | neurotransmitter secretion                                               | 0.206730239 | 0.134625376 | 1 |
| GO:0010921 | regulation of phosphatase activity                                       | 0.206730239 | 0.134625376 | 1 |

|                |                                                          |                 |                 |   |
|----------------|----------------------------------------------------------|-----------------|-----------------|---|
| GO:00996<br>43 | signal release from synapse                              | 0.2067302<br>39 | 0.1346253<br>76 | 1 |
| GO:00508<br>51 | antigen receptor-mediated signaling pathway              | 0.2070565<br>69 | 0.1346253<br>76 | 1 |
| GO:00080<br>89 | anterograde axonal transport                             | 0.2073536<br>23 | 0.1346253<br>76 | 1 |
| GO:00149<br>11 | positive regulation of smooth muscle cell migration      | 0.2073536<br>23 | 0.1346253<br>76 | 1 |
| GO:00336<br>28 | regulation of cell adhesion mediated by integrin         | 0.2073536<br>23 | 0.1346253<br>76 | 1 |
| GO:00424<br>61 | photoreceptor cell development                           | 0.2073536<br>23 | 0.1346253<br>76 | 1 |
| GO:00519<br>32 | synaptic transmission, GABAergic                         | 0.2073536<br>23 | 0.1346253<br>76 | 1 |
| GO:00519<br>72 | regulation of telomerase activity                        | 0.2073536<br>23 | 0.1346253<br>76 | 1 |
| GO:00550<br>10 | ventricular cardiac muscle tissue morphogenesis          | 0.2073536<br>23 | 0.1346253<br>76 | 1 |
| GO:00606<br>32 | regulation of microtubule-based movement                 | 0.2073536<br>23 | 0.1346253<br>76 | 1 |
| GO:00701<br>69 | positive regulation of biomineral tissue development     | 0.2073536<br>23 | 0.1346253<br>76 | 1 |
| GO:01101<br>51 | positive regulation of biomineralization                 | 0.2073536<br>23 | 0.1346253<br>76 | 1 |
| GO:19002<br>71 | regulation of long-term synaptic potentiation            | 0.2073536<br>23 | 0.1346253<br>76 | 1 |
| GO:19040<br>36 | negative regulation of epithelial cell apoptotic process | 0.2073536<br>23 | 0.1346253<br>76 | 1 |
| GO:19905<br>73 | potassium ion import across plasma membrane              | 0.2073536<br>23 | 0.1346253<br>76 | 1 |
| GO:19909<br>28 | response to amino acid starvation                        | 0.2073536<br>23 | 0.1346253<br>76 | 1 |
| GO:00093<br>95 | phospholipid catabolic process                           | 0.2111866<br>99 | 0.1366726<br>66 | 1 |
| GO:00107<br>12 | regulation of collagen metabolic process                 | 0.2111866<br>99 | 0.1366726<br>66 | 1 |
| GO:00181<br>98 | peptidyl-cysteine modification                           | 0.2111866<br>99 | 0.1366726<br>66 | 1 |
| GO:00474<br>96 | vesicle transport along microtubule                      | 0.2111866<br>99 | 0.1366726<br>66 | 1 |
| GO:00486<br>41 | regulation of skeletal muscle tissue development         | 0.2111866<br>99 | 0.1366726<br>66 | 1 |
| GO:00613<br>83 | trabecula morphogenesis                                  | 0.2111866<br>99 | 0.1366726<br>66 | 1 |

|                |                                                                          |                 |                 |   |
|----------------|--------------------------------------------------------------------------|-----------------|-----------------|---|
| GO:00616<br>47 | histone H3-K9 modification                                               | 0.2111866<br>99 | 0.1366726<br>66 | 1 |
| GO:19900<br>90 | cellular response to nerve growth factor stimulus                        | 0.2111866<br>99 | 0.1366726<br>66 | 1 |
| GO:20001<br>07 | negative regulation of leukocyte apoptotic process                       | 0.2111866<br>99 | 0.1366726<br>66 | 1 |
| GO:00329<br>84 | protein-containing complex disassembly                                   | 0.2133030<br>78 | 0.1379929<br>59 | 1 |
| GO:00019<br>61 | positive regulation of cytokine-mediated signaling pathway               | 0.2150014<br>41 | 0.1385961<br>7  | 1 |
| GO:00027<br>11 | positive regulation of T cell mediated immunity                          | 0.2150014<br>41 | 0.1385961<br>7  | 1 |
| GO:00080<br>38 | neuron recognition                                                       | 0.2150014<br>41 | 0.1385961<br>7  | 1 |
| GO:00107<br>18 | positive regulation of epithelial to mesenchymal transition              | 0.2150014<br>41 | 0.1385961<br>7  | 1 |
| GO:00196<br>74 | NAD metabolic process                                                    | 0.2150014<br>41 | 0.1385961<br>7  | 1 |
| GO:00455<br>40 | regulation of cholesterol biosynthetic process                           | 0.2150014<br>41 | 0.1385961<br>7  | 1 |
| GO:00717<br>15 | icosanoid transport                                                      | 0.2150014<br>41 | 0.1385961<br>7  | 1 |
| GO:01061<br>18 | regulation of sterol biosynthetic process                                | 0.2150014<br>41 | 0.1385961<br>7  | 1 |
| GO:19015<br>71 | fatty acid derivative transport                                          | 0.2150014<br>41 | 0.1385961<br>7  | 1 |
| GO:19037<br>27 | positive regulation of phospholipid metabolic process                    | 0.2150014<br>41 | 0.1385961<br>7  | 1 |
| GO:00311<br>13 | regulation of microtubule polymerization                                 | 0.2187979<br>37 | 0.1405428<br>15 | 1 |
| GO:00328<br>73 | negative regulation of stress-activated MAPK cascade                     | 0.2187979<br>37 | 0.1405428<br>15 | 1 |
| GO:00351<br>76 | social behavior                                                          | 0.2187979<br>37 | 0.1405428<br>15 | 1 |
| GO:00432<br>77 | apoptotic cell clearance                                                 | 0.2187979<br>37 | 0.1405428<br>15 | 1 |
| GO:00482<br>55 | mRNA stabilization                                                       | 0.2187979<br>37 | 0.1405428<br>15 | 1 |
| GO:00609<br>76 | coronary vasculature development                                         | 0.2187979<br>37 | 0.1405428<br>15 | 1 |
| GO:00703<br>03 | negative regulation of stress-activated protein kinase signaling cascade | 0.2187979<br>37 | 0.1405428<br>15 | 1 |
| GO:00718<br>27 | plasma lipoprotein particle organization                                 | 0.2187979<br>37 | 0.1405428<br>15 | 1 |

|                |                                                                                              |                 |                 |   |
|----------------|----------------------------------------------------------------------------------------------|-----------------|-----------------|---|
| GO:00725<br>23 | purine-containing compound catabolic process                                                 | 0.2187979<br>37 | 0.1405428<br>15 | 1 |
| GO:19035<br>87 | regulation of blood vessel endothelial cell proliferation involved in sprouting angiogenesis | 0.2187979<br>37 | 0.1405428<br>15 | 1 |
| GO:00434<br>33 | negative regulation of DNA-binding transcription factor activity                             | 0.2208674<br>23 | 0.1418217<br>85 | 1 |
| GO:00019<br>12 | positive regulation of leukocyte mediated cytotoxicity                                       | 0.2225762<br>73 | 0.1422537<br>38 | 1 |
| GO:00031<br>79 | heart valve morphogenesis                                                                    | 0.2225762<br>73 | 0.1422537<br>38 | 1 |
| GO:00323<br>30 | regulation of chondrocyte differentiation                                                    | 0.2225762<br>73 | 0.1422537<br>38 | 1 |
| GO:00330<br>59 | cellular pigmentation                                                                        | 0.2225762<br>73 | 0.1422537<br>38 | 1 |
| GO:00465<br>80 | negative regulation of Ras protein signal transduction                                       | 0.2225762<br>73 | 0.1422537<br>38 | 1 |
| GO:00482<br>60 | positive regulation of receptor-mediated endocytosis                                         | 0.2225762<br>73 | 0.1422537<br>38 | 1 |
| GO:00513<br>39 | regulation of lyase activity                                                                 | 0.2225762<br>73 | 0.1422537<br>38 | 1 |
| GO:00514<br>45 | regulation of meiotic cell cycle                                                             | 0.2225762<br>73 | 0.1422537<br>38 | 1 |
| GO:00604<br>25 | lung morphogenesis                                                                           | 0.2225762<br>73 | 0.1422537<br>38 | 1 |
| GO:19900<br>89 | response to nerve growth factor                                                              | 0.2225762<br>73 | 0.1422537<br>38 | 1 |
| GO:20012<br>38 | positive regulation of extrinsic apoptotic signaling pathway                                 | 0.2225762<br>73 | 0.1422537<br>38 | 1 |
| GO:20012<br>58 | negative regulation of cation channel activity                                               | 0.2225762<br>73 | 0.1422537<br>38 | 1 |
| GO:00463<br>28 | regulation of JNK cascade                                                                    | 0.2226407<br>54 | 0.1422537<br>38 | 1 |
| GO:00900<br>90 | negative regulation of canonical Wnt signaling pathway                                       | 0.2226407<br>54 | 0.1422537<br>38 | 1 |
| GO:19907<br>78 | protein localization to cell periphery                                                       | 0.2259175<br>77 | 0.1439543<br>07 | 1 |
| GO:00076<br>32 | visual behavior                                                                              | 0.2263365<br>34 | 0.1439543<br>07 | 1 |
| GO:00083<br>33 | endosome to lysosome transport                                                               | 0.2263365<br>34 | 0.1439543<br>07 | 1 |
| GO:00329<br>64 | collagen biosynthetic process                                                                | 0.2263365<br>34 | 0.1439543<br>07 | 1 |
| GO:00353<br>84 | thioester biosynthetic process                                                               | 0.2263365<br>34 | 0.1439543<br>07 | 1 |

|                |                                                                        |                 |                 |   |
|----------------|------------------------------------------------------------------------|-----------------|-----------------|---|
| GO:00433<br>92 | negative regulation of DNA binding                                     | 0.2263365<br>34 | 0.1439543<br>07 | 1 |
| GO:00456<br>68 | negative regulation of osteoblast differentiation                      | 0.2263365<br>34 | 0.1439543<br>07 | 1 |
| GO:00517<br>03 | intraspecies interaction between organisms                             | 0.2263365<br>34 | 0.1439543<br>07 | 1 |
| GO:00713<br>20 | cellular response to cAMP                                              | 0.2263365<br>34 | 0.1439543<br>07 | 1 |
| GO:00716<br>16 | acyl-CoA biosynthetic process                                          | 0.2263365<br>34 | 0.1439543<br>07 | 1 |
| GO:00726<br>98 | protein localization to microtubule cytoskeleton                       | 0.2263365<br>34 | 0.1439543<br>07 | 1 |
| GO:00970<br>35 | regulation of membrane lipid distribution                              | 0.2263365<br>34 | 0.1439543<br>07 | 1 |
| GO:20007<br>72 | regulation of cellular senescence                                      | 0.2263365<br>34 | 0.1439543<br>07 | 1 |
| GO:00022<br>85 | lymphocyte activation involved in immune response                      | 0.2279677<br>17 | 0.1448899<br>14 | 1 |
| GO:00434<br>09 | negative regulation of MAPK cascade                                    | 0.2279677<br>17 | 0.1448899<br>14 | 1 |
| GO:00313<br>45 | negative regulation of cell projection organization                    | 0.2297455<br>22 | 0.1459685<br>66 | 1 |
| GO:00096<br>20 | response to fungus                                                     | 0.2300788<br>07 | 0.1460264<br>98 | 1 |
| GO:00105<br>24 | positive regulation of calcium ion transport into cytosol              | 0.2300788<br>07 | 0.1460264<br>98 | 1 |
| GO:19030<br>18 | regulation of glycoprotein metabolic process                           | 0.2300788<br>07 | 0.1460264<br>98 | 1 |
| GO:00991<br>11 | microtubule-based transport                                            | 0.2333040<br>54 | 0.1479233<br>2  | 1 |
| GO:00027<br>20 | positive regulation of cytokine production involved in immune response | 0.2338031<br>76 | 0.1479233<br>2  | 1 |
| GO:00032<br>29 | ventricular cardiac muscle tissue development                          | 0.2338031<br>76 | 0.1479233<br>2  | 1 |
| GO:00083<br>47 | glial cell migration                                                   | 0.2338031<br>76 | 0.1479233<br>2  | 1 |
| GO:00326<br>55 | regulation of interleukin-12 production                                | 0.2338031<br>76 | 0.1479233<br>2  | 1 |
| GO:00327<br>81 | positive regulation of ATPase activity                                 | 0.2338031<br>76 | 0.1479233<br>2  | 1 |
| GO:00350<br>65 | regulation of histone acetylation                                      | 0.2338031<br>76 | 0.1479233<br>2  | 1 |
| GO:00504<br>33 | regulation of catecholamine secretion                                  | 0.2338031<br>76 | 0.1479233<br>2  | 1 |

|                |                                                          |                 |                 |   |
|----------------|----------------------------------------------------------|-----------------|-----------------|---|
| GO:00718<br>25 | protein-lipid complex subunit organization               | 0.2338031<br>76 | 0.1479233<br>2  | 1 |
| GO:00481<br>67 | regulation of synaptic plasticity                        | 0.2350846<br>8  | 0.1486821<br>19 | 1 |
| GO:00165<br>25 | negative regulation of angiogenesis                      | 0.2368661<br>48 | 0.1497564<br>85 | 1 |
| GO:00027<br>12 | regulation of B cell mediated immunity                   | 0.2375097<br>26 | 0.1497970<br>02 | 1 |
| GO:00028<br>89 | regulation of immunoglobulin mediated immune response    | 0.2375097<br>26 | 0.1497970<br>02 | 1 |
| GO:00106<br>65 | regulation of cardiac muscle cell apoptotic process      | 0.2375097<br>26 | 0.1497970<br>02 | 1 |
| GO:00193<br>20 | hexose catabolic process                                 | 0.2375097<br>26 | 0.1497970<br>02 | 1 |
| GO:00300<br>71 | regulation of mitotic metaphase/anaphase transition      | 0.2375097<br>26 | 0.1497970<br>02 | 1 |
| GO:00312<br>95 | T cell costimulation                                     | 0.2375097<br>26 | 0.1497970<br>02 | 1 |
| GO:00507<br>32 | negative regulation of peptidyl-tyrosine phosphorylation | 0.2375097<br>26 | 0.1497970<br>02 | 1 |
| GO:00611<br>36 | regulation of proteasomal protein catabolic process      | 0.2386484<br>07 | 0.1504627<br>22 | 1 |
| GO:20001<br>81 | negative regulation of blood vessel morphogenesis        | 0.2404314<br>1  | 0.1515340<br>68 | 1 |
| GO:00020<br>90 | regulation of receptor internalization                   | 0.2411985<br>41 | 0.1515951<br>42 | 1 |
| GO:00065<br>76 | cellular biogenic amine metabolic process                | 0.2411985<br>41 | 0.1515951<br>42 | 1 |
| GO:00443<br>80 | protein localization to cytoskeleton                     | 0.2411985<br>41 | 0.1515951<br>42 | 1 |
| GO:00458<br>40 | positive regulation of mitotic nuclear division          | 0.2411985<br>41 | 0.1515951<br>42 | 1 |
| GO:00504<br>32 | catecholamine secretion                                  | 0.2411985<br>41 | 0.1515951<br>42 | 1 |
| GO:00607<br>60 | positive regulation of response to cytokine stimulus     | 0.2411985<br>41 | 0.1515951<br>42 | 1 |
| GO:00610<br>05 | cell differentiation involved in kidney development      | 0.2411985<br>41 | 0.1515951<br>42 | 1 |
| GO:00974<br>79 | synaptic vesicle localization                            | 0.2411985<br>41 | 0.1515951<br>42 | 1 |
| GO:19011<br>36 | carbohydrate derivative catabolic process                | 0.2422151<br>09 | 0.1521812<br>03 | 1 |
| GO:00507<br>28 | negative regulation of inflammatory response             | 0.2439994<br>56 | 0.1531047<br>99 | 1 |

|                |                                                                                |                 |                 |   |
|----------------|--------------------------------------------------------------------------------|-----------------|-----------------|---|
| GO:00007<br>68 | syncytium formation by plasma membrane fusion                                  | 0.2448697<br>06 | 0.1531047<br>99 | 1 |
| GO:00020<br>43 | blood vessel endothelial cell proliferation involved in sprouting angiogenesis | 0.2448697<br>06 | 0.1531047<br>99 | 1 |
| GO:00070<br>91 | metaphase/anaphase transition of mitotic cell cycle                            | 0.2448697<br>06 | 0.1531047<br>99 | 1 |
| GO:00106<br>56 | negative regulation of muscle cell apoptotic process                           | 0.2448697<br>06 | 0.1531047<br>99 | 1 |
| GO:00106<br>62 | regulation of striated muscle cell apoptotic process                           | 0.2448697<br>06 | 0.1531047<br>99 | 1 |
| GO:00312<br>94 | lymphocyte costimulation                                                       | 0.2448697<br>06 | 0.1531047<br>99 | 1 |
| GO:00353<br>06 | positive regulation of dephosphorylation                                       | 0.2448697<br>06 | 0.1531047<br>99 | 1 |
| GO:00434<br>89 | RNA stabilization                                                              | 0.2448697<br>06 | 0.1531047<br>99 | 1 |
| GO:01402<br>53 | cell-cell fusion                                                               | 0.2448697<br>06 | 0.1531047<br>99 | 1 |
| GO:19020<br>99 | regulation of metaphase/anaphase transition of cell cycle                      | 0.2448697<br>06 | 0.1531047<br>99 | 1 |
| GO:19023<br>73 | negative regulation of mRNA catabolic process                                  | 0.2448697<br>06 | 0.1531047<br>99 | 1 |
| GO:19037<br>93 | positive regulation of anion transport                                         | 0.2448697<br>06 | 0.1531047<br>99 | 1 |
| GO:20002<br>72 | negative regulation of signaling receptor activity                             | 0.2448697<br>06 | 0.1531047<br>99 | 1 |
| GO:00061<br>64 | purine nucleotide biosynthetic process                                         | 0.2457844<br>04 | 0.1535705<br>84 | 1 |
| GO:00066<br>94 | steroid biosynthetic process                                                   | 0.2457844<br>04 | 0.1535705<br>84 | 1 |
| GO:00106<br>59 | cardiac muscle cell apoptotic process                                          | 0.2485233<br>03 | 0.1549074<br>67 | 1 |
| GO:00430<br>30 | regulation of macrophage activation                                            | 0.2485233<br>03 | 0.1549074<br>67 | 1 |
| GO:00458<br>15 | positive regulation of gene expression, epigenetic                             | 0.2485233<br>03 | 0.1549074<br>67 | 1 |
| GO:00466<br>05 | regulation of centrosome cycle                                                 | 0.2485233<br>03 | 0.1549074<br>67 | 1 |
| GO:00507<br>07 | regulation of cytokine secretion                                               | 0.2485233<br>03 | 0.1549074<br>67 | 1 |
| GO:00510<br>58 | negative regulation of small GTPase mediated signal transduction               | 0.2485233<br>03 | 0.1549074<br>67 | 1 |
| GO:00713<br>85 | cellular response to glucocorticoid stimulus                                   | 0.2485233<br>03 | 0.1549074<br>67 | 1 |



|                |                                                   |                 |                 |   |
|----------------|---------------------------------------------------|-----------------|-----------------|---|
| GO:00995<br>04 | synaptic vesicle cycle                            | 0.2493559<br>16 | 0.1553729<br>23 | 1 |
| GO:00307<br>05 | cytoskeleton-dependent intracellular transport    | 0.2511423<br>87 | 0.1564322       | 1 |
| GO:00069<br>49 | syncytium formation                               | 0.2521594<br>16 | 0.1565805<br>86 | 1 |
| GO:00182<br>08 | peptidyl-proline modification                     | 0.2521594<br>16 | 0.1565805<br>86 | 1 |
| GO:00308<br>65 | cortical cytoskeleton organization                | 0.2521594<br>16 | 0.1565805<br>86 | 1 |
| GO:00326<br>53 | regulation of interleukin-10 production           | 0.2521594<br>16 | 0.1565805<br>86 | 1 |
| GO:00420<br>93 | T-helper cell differentiation                     | 0.2521594<br>16 | 0.1565805<br>86 | 1 |
| GO:00433<br>88 | positive regulation of DNA binding                | 0.2521594<br>16 | 0.1565805<br>86 | 1 |
| GO:00439<br>66 | histone H3 acetylation                            | 0.2521594<br>16 | 0.1565805<br>86 | 1 |
| GO:00447<br>84 | metaphase/anaphase transition of cell cycle       | 0.2521594<br>16 | 0.1565805<br>86 | 1 |
| GO:00718<br>06 | protein transmembrane transport                   | 0.2521594<br>16 | 0.1565805<br>86 | 1 |
| GO:00436<br>87 | post-translational protein modification           | 0.2554457<br>03 | 0.1581762<br>79 | 1 |
| GO:00031<br>70 | heart valve development                           | 0.2557781<br>28 | 0.1581762<br>79 | 1 |
| GO:00106<br>58 | striated muscle cell apoptotic process            | 0.2557781<br>28 | 0.1581762<br>79 | 1 |
| GO:00109<br>65 | regulation of mitotic sister chromatid separation | 0.2557781<br>28 | 0.1581762<br>79 | 1 |
| GO:00313<br>43 | positive regulation of cell killing               | 0.2557781<br>28 | 0.1581762<br>79 | 1 |
| GO:00427<br>33 | embryonic digit morphogenesis                     | 0.2557781<br>28 | 0.1581762<br>79 | 1 |
| GO:00450<br>71 | negative regulation of viral genome replication   | 0.2557781<br>28 | 0.1581762<br>79 | 1 |
| GO:00468<br>47 | filopodium assembly                               | 0.2557781<br>28 | 0.1581762<br>79 | 1 |
| GO:00468<br>88 | negative regulation of hormone secretion          | 0.2557781<br>28 | 0.1581762<br>79 | 1 |
| GO:00513<br>10 | metaphase plate congression                       | 0.2557781<br>28 | 0.1581762<br>79 | 1 |
| GO:00903<br>42 | regulation of cell aging                          | 0.2557781<br>28 | 0.1581762<br>79 | 1 |

|                |                                                                                                                           |                 |                 |   |
|----------------|---------------------------------------------------------------------------------------------------------------------------|-----------------|-----------------|---|
| GO:20007<br>56 | regulation of peptidyl-lysine acetylation                                                                                 | 0.2557781<br>28 | 0.1581762<br>79 | 1 |
| GO:00024<br>49 | lymphocyte mediated immunity                                                                                              | 0.2593406<br>47 | 0.1600205<br>99 | 1 |
| GO:00022<br>94 | CD4-positive, alpha-beta T cell differentiation involved in immune response                                               | 0.2593795<br>2  | 0.1600205<br>99 | 1 |
| GO:00341<br>13 | heterotypic cell-cell adhesion                                                                                            | 0.2593795<br>2  | 0.1600205<br>99 | 1 |
| GO:00518<br>51 | modulation by host of symbiont process                                                                                    | 0.2593795<br>2  | 0.1600205<br>99 | 1 |
| GO:00550<br>81 | anion homeostasis                                                                                                         | 0.2593795<br>2  | 0.1600205<br>99 | 1 |
| GO:00713<br>84 | cellular response to corticosteroid stimulus                                                                              | 0.2593795<br>2  | 0.1600205<br>99 | 1 |
| GO:01401<br>15 | export across plasma membrane                                                                                             | 0.2593795<br>2  | 0.1600205<br>99 | 1 |
| GO:00022<br>87 | alpha-beta T cell activation involved in immune response                                                                  | 0.2629636<br>76 | 0.1620108<br>45 | 1 |
| GO:00022<br>93 | alpha-beta T cell differentiation involved in immune response                                                             | 0.2629636<br>76 | 0.1620108<br>45 | 1 |
| GO:00060<br>81 | cellular aldehyde metabolic process                                                                                       | 0.2629636<br>76 | 0.1620108<br>45 | 1 |
| GO:00465<br>30 | photoreceptor cell differentiation                                                                                        | 0.2629636<br>76 | 0.1620108<br>45 | 1 |
| GO:00024<br>60 | adaptive immune response based on somatic recombination of immune receptors built from immunoglobulin superfamily domains | 0.2645467<br>62 | 0.1629307<br>03 | 1 |
| GO:00725<br>22 | purine-containing compound biosynthetic process                                                                           | 0.2654454<br>24 | 0.1634285<br>5  | 1 |
| GO:00019<br>47 | heart looping                                                                                                             | 0.2665306<br>76 | 0.1637068<br>04 | 1 |
| GO:00325<br>07 | maintenance of protein location in cell                                                                                   | 0.2665306<br>76 | 0.1637068<br>04 | 1 |
| GO:00328<br>35 | glomerulus development                                                                                                    | 0.2665306<br>76 | 0.1637068<br>04 | 1 |
| GO:00333<br>44 | cholesterol efflux                                                                                                        | 0.2665306<br>76 | 0.1637068<br>04 | 1 |
| GO:00421<br>30 | negative regulation of T cell proliferation                                                                               | 0.2665306<br>76 | 0.1637068<br>04 | 1 |
| GO:00513<br>06 | mitotic sister chromatid separation                                                                                       | 0.2665306<br>76 | 0.1637068<br>04 | 1 |
| GO:00518<br>98 | negative regulation of protein kinase B signaling                                                                         | 0.2665306<br>76 | 0.1637068<br>04 | 1 |
| GO:00400<br>29 | regulation of gene expression, epigenetic                                                                                 | 0.2672340<br>57 | 0.1640831<br>33 | 1 |

|                |                                                      |                 |                 |   |
|----------------|------------------------------------------------------|-----------------|-----------------|---|
| GO:00023<br>77 | immunoglobulin production                            | 0.2690227<br>16 | 0.1651253<br>48 | 1 |
| GO:00075<br>88 | excretion                                            | 0.2700806<br>02 | 0.1651584<br>13 | 1 |
| GO:00171<br>56 | calcium-ion regulated exocytosis                     | 0.2700806<br>02 | 0.1651584<br>13 | 1 |
| GO:00308<br>37 | negative regulation of actin filament polymerization | 0.2700806<br>02 | 0.1651584<br>13 | 1 |
| GO:00316<br>40 | killing of cells of other organism                   | 0.2700806<br>02 | 0.1651584<br>13 | 1 |
| GO:00316<br>46 | positive regulation of nervous system process        | 0.2700806<br>02 | 0.1651584<br>13 | 1 |
| GO:00327<br>29 | positive regulation of interferon-gamma production   | 0.2700806<br>02 | 0.1651584<br>13 | 1 |
| GO:00467<br>82 | regulation of viral transcription                    | 0.2700806<br>02 | 0.1651584<br>13 | 1 |
| GO:00482<br>47 | lymphocyte chemotaxis                                | 0.2700806<br>02 | 0.1651584<br>13 | 1 |
| GO:00486<br>45 | animal organ formation                               | 0.2700806<br>02 | 0.1651584<br>13 | 1 |
| GO:00901<br>81 | regulation of cholesterol metabolic process          | 0.2700806<br>02 | 0.1651584<br>13 | 1 |
| GO:19023<br>05 | regulation of sodium ion transmembrane transport     | 0.2700806<br>02 | 0.1651584<br>13 | 1 |
| GO:00313<br>96 | regulation of protein ubiquitination                 | 0.2708113<br>59 | 0.1655493<br>34 | 1 |
| GO:00327<br>15 | negative regulation of interleukin-6 production      | 0.2736135<br>35 | 0.1669802<br>67 | 1 |
| GO:00456<br>69 | positive regulation of osteoblast differentiation    | 0.2736135<br>35 | 0.1669802<br>67 | 1 |
| GO:00463<br>65 | monosaccharide catabolic process                     | 0.2736135<br>35 | 0.1669802<br>67 | 1 |
| GO:00509<br>22 | negative regulation of chemotaxis                    | 0.2736135<br>35 | 0.1669802<br>67 | 1 |
| GO:19058<br>18 | regulation of chromosome separation                  | 0.2736135<br>35 | 0.1669802<br>67 | 1 |
| GO:00072<br>54 | JNK cascade                                          | 0.2743884<br>35 | 0.1673402<br>94 | 1 |
| GO:00450<br>89 | positive regulation of innate immune response        | 0.2743884<br>35 | 0.1673402<br>94 | 1 |
| GO:00091<br>66 | nucleotide catabolic process                         | 0.2771295<br>55 | 0.1685008<br>86 | 1 |
| GO:00328<br>90 | regulation of organic acid transport                 | 0.2771295<br>55 | 0.1685008<br>86 | 1 |

|                |                                                           |                 |                 |   |
|----------------|-----------------------------------------------------------|-----------------|-----------------|---|
| GO:00338<br>66 | nucleoside bisphosphate biosynthetic process              | 0.2771295<br>55 | 0.1685008<br>86 | 1 |
| GO:00340<br>30 | ribonucleoside bisphosphate biosynthetic process          | 0.2771295<br>55 | 0.1685008<br>86 | 1 |
| GO:00340<br>33 | purine nucleoside bisphosphate biosynthetic process       | 0.2771295<br>55 | 0.1685008<br>86 | 1 |
| GO:00343<br>32 | adherens junction organization                            | 0.2771295<br>55 | 0.1685008<br>86 | 1 |
| GO:00364<br>98 | IRE1-mediated unfolded protein response                   | 0.2771295<br>55 | 0.1685008<br>86 | 1 |
| GO:00422<br>55 | ribosome assembly                                         | 0.2771295<br>55 | 0.1685008<br>86 | 1 |
| GO:00713<br>00 | cellular response to retinoic acid                        | 0.2771295<br>55 | 0.1685008<br>86 | 1 |
| GO:00069<br>09 | phagocytosis                                              | 0.2802417<br>61 | 0.1701710<br>2  | 1 |
| GO:00066<br>25 | protein targeting to peroxisome                           | 0.2806287<br>41 | 0.1701710<br>2  | 1 |
| GO:00108<br>12 | negative regulation of cell-substrate adhesion            | 0.2806287<br>41 | 0.1701710<br>2  | 1 |
| GO:00424<br>46 | hormone biosynthetic process                              | 0.2806287<br>41 | 0.1701710<br>2  | 1 |
| GO:00511<br>48 | negative regulation of muscle cell differentiation        | 0.2806287<br>41 | 0.1701710<br>2  | 1 |
| GO:00726<br>62 | protein localization to peroxisome                        | 0.2806287<br>41 | 0.1701710<br>2  | 1 |
| GO:00726<br>63 | establishment of protein localization to peroxisome       | 0.2806287<br>41 | 0.1701710<br>2  | 1 |
| GO:19023<br>69 | negative regulation of RNA catabolic process              | 0.2806287<br>41 | 0.1701710<br>2  | 1 |
| GO:00359<br>14 | skeletal muscle cell differentiation                      | 0.2841111<br>75 | 0.1720521<br>06 | 1 |
| GO:00508<br>54 | regulation of antigen receptor-mediated signaling pathway | 0.2841111<br>75 | 0.1720521<br>06 | 1 |
| GO:00613<br>71 | determination of heart left/right asymmetry               | 0.2841111<br>75 | 0.1720521<br>06 | 1 |
| GO:00712<br>30 | cellular response to amino acid stimulus                  | 0.2841111<br>75 | 0.1720521<br>06 | 1 |
| GO:00071<br>63 | establishment or maintenance of cell polarity             | 0.2869018<br>06 | 0.1736258<br>42 | 1 |
| GO:00990<br>03 | vesicle-mediated transport in synapse                     | 0.2869018<br>06 | 0.1736258<br>42 | 1 |
| GO:00017<br>56 | somitogenesis                                             | 0.2875769<br>34 | 0.1736858<br>79 | 1 |

|                |                                                                          |                 |                 |   |
|----------------|--------------------------------------------------------------------------|-----------------|-----------------|---|
| GO:00031<br>43 | embryonic heart tube morphogenesis                                       | 0.2875769<br>34 | 0.1736858<br>79 | 1 |
| GO:00323<br>74 | regulation of cholesterol transport                                      | 0.2875769<br>34 | 0.1736858<br>79 | 1 |
| GO:00439<br>67 | histone H4 acetylation                                                   | 0.2875769<br>34 | 0.1736858<br>79 | 1 |
| GO:00507<br>71 | negative regulation of axonogenesis                                      | 0.2875769<br>34 | 0.1736858<br>79 | 1 |
| GO:00507<br>95 | regulation of behavior                                                   | 0.2875769<br>34 | 0.1736858<br>79 | 1 |
| GO:00022<br>92 | T cell differentiation involved in immune response                       | 0.2910260<br>99 | 0.1754761<br>97 | 1 |
| GO:00323<br>71 | regulation of sterol transport                                           | 0.2910260<br>99 | 0.1754761<br>97 | 1 |
| GO:00336<br>27 | cell adhesion mediated by integrin                                       | 0.2910260<br>99 | 0.1754761<br>97 | 1 |
| GO:00508<br>91 | multicellular organismal water homeostasis                               | 0.2910260<br>99 | 0.1754761<br>97 | 1 |
| GO:00517<br>85 | positive regulation of nuclear division                                  | 0.2910260<br>99 | 0.1754761<br>97 | 1 |
| GO:00192<br>26 | transmission of nerve impulse                                            | 0.2944587<br>47 | 0.1772506<br>17 | 1 |
| GO:00330<br>47 | regulation of mitotic sister chromatid segregation                       | 0.2944587<br>47 | 0.1772506<br>17 | 1 |
| GO:00424<br>40 | pigment metabolic process                                                | 0.2944587<br>47 | 0.1772506<br>17 | 1 |
| GO:00435<br>74 | peroxisomal transport                                                    | 0.2944587<br>47 | 0.1772506<br>17 | 1 |
| GO:00610<br>35 | regulation of cartilage development                                      | 0.2944587<br>47 | 0.1772506<br>17 | 1 |
| GO:19030<br>50 | regulation of proteolysis involved in cellular protein catabolic process | 0.2958284<br>52 | 0.1780158<br>96 | 1 |
| GO:00027<br>09 | regulation of T cell mediated immunity                                   | 0.2978749<br>57 | 0.1790687<br>36 | 1 |
| GO:19012<br>92 | nucleoside phosphate catabolic process                                   | 0.2978749<br>57 | 0.1790687<br>36 | 1 |
| GO:19021<br>17 | positive regulation of organelle assembly                                | 0.2978749<br>57 | 0.1790687<br>36 | 1 |
| GO:00160<br>64 | immunoglobulin mediated immune response                                  | 0.2993952<br>24 | 0.1799228<br>76 | 1 |
| GO:00063<br>05 | DNA alkylation                                                           | 0.3012748<br>07 | 0.1805726<br>52 | 1 |
| GO:00063<br>06 | DNA methylation                                                          | 0.3012748<br>07 | 0.1805726<br>52 | 1 |

|                |                                                                         |                 |                 |   |
|----------------|-------------------------------------------------------------------------|-----------------|-----------------|---|
| GO:00066<br>35 | fatty acid beta-oxidation                                               | 0.3012748<br>07 | 0.1805726<br>52 | 1 |
| GO:00320<br>24 | positive regulation of insulin secretion                                | 0.3012748<br>07 | 0.1805726<br>52 | 1 |
| GO:00324<br>81 | positive regulation of type I interferon production                     | 0.3012748<br>07 | 0.1805726<br>52 | 1 |
| GO:00341<br>21 | regulation of toll-like receptor signaling pathway                      | 0.3012748<br>07 | 0.1805726<br>52 | 1 |
| GO:00422<br>73 | ribosomal large subunit biogenesis                                      | 0.3012748<br>07 | 0.1805726<br>52 | 1 |
| GO:00435<br>07 | positive regulation of JUN kinase activity                              | 0.3012748<br>07 | 0.1805726<br>52 | 1 |
| GO:00019<br>10 | regulation of leukocyte mediated cytotoxicity                           | 0.3046583<br>74 | 0.1821068<br>72 | 1 |
| GO:00066<br>95 | cholesterol biosynthetic process                                        | 0.3046583<br>74 | 0.1821068<br>72 | 1 |
| GO:00090<br>64 | glutamine family amino acid metabolic process                           | 0.3046583<br>74 | 0.1821068<br>72 | 1 |
| GO:00159<br>09 | long-chain fatty acid transport                                         | 0.3046583<br>74 | 0.1821068<br>72 | 1 |
| GO:00488<br>44 | artery morphogenesis                                                    | 0.3046583<br>74 | 0.1821068<br>72 | 1 |
| GO:00618<br>44 | antimicrobial humoral immune response mediated by antimicrobial peptide | 0.3046583<br>74 | 0.1821068<br>72 | 1 |
| GO:00995<br>18 | vesicle cytoskeletal trafficking                                        | 0.3046583<br>74 | 0.1821068<br>72 | 1 |
| GO:19026<br>53 | secondary alcohol biosynthetic process                                  | 0.3046583<br>74 | 0.1821068<br>72 | 1 |
| GO:00197<br>24 | B cell mediated immunity                                                | 0.3047403<br>3  | 0.1821068<br>72 | 1 |
| GO:00322<br>71 | regulation of protein polymerization                                    | 0.3065205<br>47 | 0.1831102<br>22 | 1 |
| GO:00032<br>81 | ventricular septum development                                          | 0.3080257<br>36 | 0.1838879<br>79 | 1 |
| GO:00062<br>78 | RNA-dependent DNA biosynthetic process                                  | 0.3080257<br>36 | 0.1838879<br>79 | 1 |
| GO:00182<br>05 | peptidyl-lysine modification                                            | 0.3105499<br>95 | 0.1853337<br>88 | 1 |
| GO:00467<br>85 | microtubule polymerization                                              | 0.3113769<br>68 | 0.1857048<br>22 | 1 |
| GO:00708<br>30 | bicellular tight junction assembly                                      | 0.3113769<br>68 | 0.1857048<br>22 | 1 |
| GO:00433<br>67 | CD4-positive, alpha-beta T cell differentiation                         | 0.3147121<br>48 | 0.1876320<br>76 | 1 |

|                |                                                               |                 |                 |   |
|----------------|---------------------------------------------------------------|-----------------|-----------------|---|
| GO:00442<br>42 | cellular lipid catabolic process                              | 0.3154089<br>81 | 0.1879855<br>9  | 1 |
| GO:00028<br>31 | regulation of response to biotic stimulus                     | 0.3158390<br>8  | 0.1881799<br>49 | 1 |
| GO:00068<br>26 | iron ion transport                                            | 0.3180313<br>52 | 0.1889262<br>51 | 1 |
| GO:00070<br>32 | endosome organization                                         | 0.3180313<br>52 | 0.1889262<br>51 | 1 |
| GO:00301<br>04 | water homeostasis                                             | 0.3180313<br>52 | 0.1889262<br>51 | 1 |
| GO:00434<br>07 | negative regulation of MAP kinase activity                    | 0.3180313<br>52 | 0.1889262<br>51 | 1 |
| GO:00500<br>00 | chromosome localization                                       | 0.3180313<br>52 | 0.1889262<br>51 | 1 |
| GO:00506<br>72 | negative regulation of lymphocyte proliferation               | 0.3180313<br>52 | 0.1889262<br>51 | 1 |
| GO:00513<br>03 | establishment of chromosome localization                      | 0.3180313<br>52 | 0.1889262<br>51 | 1 |
| GO:01201<br>92 | tight junction assembly                                       | 0.3180313<br>52 | 0.1889262<br>51 | 1 |
| GO:19000<br>34 | regulation of cellular response to heat                       | 0.3180313<br>52 | 0.1889262<br>51 | 1 |
| GO:00023<br>12 | B cell activation involved in immune response                 | 0.3213346<br>54 | 0.1906382<br>3  | 1 |
| GO:00313<br>97 | negative regulation of protein ubiquitination                 | 0.3213346<br>54 | 0.1906382<br>3  | 1 |
| GO:00329<br>45 | negative regulation of mononuclear cell proliferation         | 0.3213346<br>54 | 0.1906382<br>3  | 1 |
| GO:00350<br>50 | embryonic heart tube development                              | 0.3213346<br>54 | 0.1906382<br>3  | 1 |
| GO:00063<br>23 | DNA packaging                                                 | 0.3225025<br>96 | 0.1912684<br>24 | 1 |
| GO:00019<br>60 | negative regulation of cytokine-mediated signaling pathway    | 0.3246221<br>31 | 0.1922733<br>89 | 1 |
| GO:00161<br>26 | sterol biosynthetic process                                   | 0.3246221<br>31 | 0.1922733<br>89 | 1 |
| GO:00432<br>42 | negative regulation of protein-containing complex disassembly | 0.3246221<br>31 | 0.1922733<br>89 | 1 |
| GO:00512<br>79 | regulation of release of sequestered calcium ion into cytosol | 0.3246221<br>31 | 0.1922733<br>89 | 1 |
| GO:00068<br>13 | potassium ion transport                                       | 0.3260429<br>99 | 0.1930517<br>76 | 1 |
| GO:00650<br>04 | protein-DNA complex assembly                                  | 0.3278114<br>92 | 0.1937672<br>46 | 1 |

|                |                                                                                   |                 |                 |   |
|----------------|-----------------------------------------------------------------------------------|-----------------|-----------------|---|
| GO:00169<br>25 | protein sumoylation                                                               | 0.3278938<br>58 | 0.1937672<br>46 | 1 |
| GO:00219<br>54 | central nervous system neuron development                                         | 0.3278938<br>58 | 0.1937672<br>46 | 1 |
| GO:00456<br>52 | regulation of megakaryocyte differentiation                                       | 0.3278938<br>58 | 0.1937672<br>46 | 1 |
| GO:01201<br>93 | tight junction organization                                                       | 0.3278938<br>58 | 0.1937672<br>46 | 1 |
| GO:19033<br>13 | positive regulation of mRNA metabolic process                                     | 0.3278938<br>58 | 0.1937672<br>46 | 1 |
| GO:00020<br>88 | lens development in camera-type eye                                               | 0.3311499<br>09 | 0.1954360<br>88 | 1 |
| GO:00070<br>31 | peroxisome organization                                                           | 0.3311499<br>09 | 0.1954360<br>88 | 1 |
| GO:00311<br>45 | anaphase-promoting complex-dependent catabolic process                            | 0.3311499<br>09 | 0.1954360<br>88 | 1 |
| GO:20010<br>21 | negative regulation of response to DNA damage stimulus                            | 0.3311499<br>09 | 0.1954360<br>88 | 1 |
| GO:00330<br>45 | regulation of sister chromatid segregation                                        | 0.3343903<br>58 | 0.1972841<br>71 | 1 |
| GO:00163<br>58 | dendrite development                                                              | 0.3348733<br>82 | 0.1975047<br>5  | 1 |
| GO:00431<br>61 | proteasome-mediated ubiquitin-dependent protein catabolic process                 | 0.3356879<br>6  | 0.1979206<br>68 | 1 |
| GO:00301<br>01 | natural killer cell activation                                                    | 0.3376152<br>8  | 0.1987332<br>35 | 1 |
| GO:00311<br>10 | regulation of microtubule polymerization or depolymerization                      | 0.3376152<br>8  | 0.1987332<br>35 | 1 |
| GO:00345<br>02 | protein localization to chromosome                                                | 0.3376152<br>8  | 0.1987332<br>35 | 1 |
| GO:00432<br>97 | apical junction assembly                                                          | 0.3376152<br>8  | 0.1987332<br>35 | 1 |
| GO:20007<br>79 | regulation of double-strand break repair                                          | 0.3376152<br>8  | 0.1987332<br>35 | 1 |
| GO:00350<br>23 | regulation of Rho protein signal transduction                                     | 0.3408247<br>47 | 0.2004268<br>48 | 1 |
| GO:00706<br>64 | negative regulation of leukocyte proliferation                                    | 0.3408247<br>47 | 0.2004268<br>48 | 1 |
| GO:19039<br>01 | negative regulation of viral life cycle                                           | 0.3408247<br>47 | 0.2004268<br>48 | 1 |
| GO:00305<br>12 | negative regulation of transforming growth factor beta receptor signaling pathway | 0.3440188<br>34 | 0.2019114<br>59 | 1 |
| GO:00480<br>13 | ephrin receptor signaling pathway                                                 | 0.3440188<br>34 | 0.2019114<br>59 | 1 |



|                |                                                                                      |                 |                 |   |
|----------------|--------------------------------------------------------------------------------------|-----------------|-----------------|---|
| GO:00512<br>62 | protein tetramerization                                                              | 0.3440188<br>34 | 0.2019114<br>59 | 1 |
| GO:00602<br>18 | hematopoietic stem cell differentiation                                              | 0.3440188<br>34 | 0.2019114<br>59 | 1 |
| GO:00602<br>91 | long-term synaptic potentiation                                                      | 0.3440188<br>34 | 0.2019114<br>59 | 1 |
| GO:00607<br>61 | negative regulation of response to cytokine stimulus                                 | 0.3440188<br>34 | 0.2019114<br>59 | 1 |
| GO:19033<br>12 | negative regulation of mRNA metabolic process                                        | 0.3471976<br>13 | 0.2037110<br>71 | 1 |
| GO:00435<br>06 | regulation of JUN kinase activity                                                    | 0.3503611<br>56 | 0.2053009<br>37 | 1 |
| GO:00435<br>37 | negative regulation of blood vessel endothelial cell migration                       | 0.3503611<br>56 | 0.2053009<br>37 | 1 |
| GO:00610<br>53 | somite development                                                                   | 0.3503611<br>56 | 0.2053009<br>37 | 1 |
| GO:19038<br>45 | negative regulation of cellular response to transforming growth factor beta stimulus | 0.3503611<br>56 | 0.2053009<br>37 | 1 |
| GO:00016<br>56 | metanephros development                                                              | 0.3566428<br>25 | 0.2085091<br>46 | 1 |
| GO:00018<br>43 | neural tube closure                                                                  | 0.3566428<br>25 | 0.2085091<br>46 | 1 |
| GO:00159<br>14 | phospholipid transport                                                               | 0.3566428<br>25 | 0.2085091<br>46 | 1 |
| GO:00309<br>01 | midbrain development                                                                 | 0.3566428<br>25 | 0.2085091<br>46 | 1 |
| GO:00456<br>82 | regulation of epidermis development                                                  | 0.3566428<br>25 | 0.2085091<br>46 | 1 |
| GO:00519<br>52 | regulation of amine transport                                                        | 0.3566428<br>25 | 0.2085091<br>46 | 1 |
| GO:19013<br>79 | regulation of potassium ion transmembrane transport                                  | 0.3566428<br>25 | 0.2085091<br>46 | 1 |
| GO:19033<br>62 | regulation of cellular protein catabolic process                                     | 0.3576723<br>01 | 0.2090434<br>81 | 1 |
| GO:00313<br>41 | regulation of cell killing                                                           | 0.3597610<br>94 | 0.2099929<br>78 | 1 |
| GO:00606<br>06 | tube closure                                                                         | 0.3597610<br>94 | 0.2099929<br>78 | 1 |
| GO:01060<br>27 | neuron projection organization                                                       | 0.3597610<br>94 | 0.2099929<br>78 | 1 |
| GO:19058<br>97 | regulation of response to endoplasmic reticulum stress                               | 0.3597610<br>94 | 0.2099929<br>78 | 1 |
| GO:00063<br>02 | double-strand break repair                                                           | 0.3611566<br>2  | 0.2107395<br>68 | 1 |

|                |                                                                            |                 |                 |   |
|----------------|----------------------------------------------------------------------------|-----------------|-----------------|---|
| GO:00451<br>85 | maintenance of protein location                                            | 0.3628644<br>15 | 0.2116678<br>3  | 1 |
| GO:00513<br>04 | chromosome separation                                                      | 0.3659528<br>58 | 0.2134006<br>01 | 1 |
| GO:00488<br>14 | regulation of dendrite morphogenesis                                       | 0.3690264<br>94 | 0.2150543<br>41 | 1 |
| GO:19037<br>25 | regulation of phospholipid metabolic process                               | 0.3690264<br>94 | 0.2150543<br>41 | 1 |
| GO:00109<br>72 | negative regulation of G2/M transition of mitotic cell cycle               | 0.3720853<br>92 | 0.2167671<br>36 | 1 |
| GO:00313<br>48 | negative regulation of defense response                                    | 0.3732972<br>37 | 0.2174031<br>3  | 1 |
| GO:00357<br>10 | CD4-positive, alpha-beta T cell activation                                 | 0.3751296<br>24 | 0.2183999<br>95 | 1 |
| GO:00066<br>44 | phospholipid metabolic process                                             | 0.3766026<br>46 | 0.2191165<br>84 | 1 |
| GO:00073<br>89 | pattern specification process                                              | 0.3766026<br>46 | 0.2191165<br>84 | 1 |
| GO:00107<br>71 | negative regulation of cell morphogenesis involved in differentiation      | 0.3781592<br>58 | 0.2196690<br>94 | 1 |
| GO:00352<br>78 | miRNA mediated inhibition of translation                                   | 0.3781592<br>58 | 0.2196690<br>94 | 1 |
| GO:00400<br>33 | negative regulation of translation, ncRNA-mediated                         | 0.3781592<br>58 | 0.2196690<br>94 | 1 |
| GO:00447<br>28 | DNA methylation or demethylation                                           | 0.3781592<br>58 | 0.2196690<br>94 | 1 |
| GO:00459<br>74 | regulation of translation, ncRNA-mediated                                  | 0.3781592<br>58 | 0.2196690<br>94 | 1 |
| GO:00107<br>17 | regulation of epithelial to mesenchymal transition                         | 0.3811743<br>64 | 0.2211365<br>76 | 1 |
| GO:00158<br>37 | amine transport                                                            | 0.3811743<br>64 | 0.2211365<br>76 | 1 |
| GO:00622<br>07 | regulation of pattern recognition receptor signaling pathway               | 0.3811743<br>64 | 0.2211365<br>76 | 1 |
| GO:00902<br>77 | positive regulation of peptide hormone secretion                           | 0.3811743<br>64 | 0.2211365<br>76 | 1 |
| GO:00027<br>02 | positive regulation of production of molecular mediator of immune response | 0.3841750<br>11 | 0.2225206<br>7  | 1 |
| GO:00302<br>19 | megakaryocyte differentiation                                              | 0.3841750<br>11 | 0.2225206<br>7  | 1 |
| GO:00352<br>82 | segmentation                                                               | 0.3841750<br>11 | 0.2225206<br>7  | 1 |
| GO:00458<br>07 | positive regulation of endocytosis                                         | 0.3841750<br>11 | 0.2225206<br>7  | 1 |

|                |                                                        |                 |                 |   |
|----------------|--------------------------------------------------------|-----------------|-----------------|---|
| GO:00616<br>40 | cytoskeleton-dependent cytokinesis                     | 0.3841750<br>11 | 0.2225206<br>7  | 1 |
| GO:00015<br>78 | microtubule bundle formation                           | 0.3871612<br>66 | 0.2240352<br>17 | 1 |
| GO:00017<br>08 | cell fate specification                                | 0.3871612<br>66 | 0.2240352<br>17 | 1 |
| GO:00311<br>24 | mRNA 3'-end processing                                 | 0.3871612<br>66 | 0.2240352<br>17 | 1 |
| GO:00320<br>06 | regulation of TOR signaling                            | 0.3901331<br>99 | 0.2256106<br>61 | 1 |
| GO:00608<br>40 | artery development                                     | 0.3901331<br>99 | 0.2256106<br>61 | 1 |
| GO:00718<br>24 | protein-DNA complex subunit organization               | 0.3955976<br>02 | 0.2285849<br>34 | 1 |
| GO:00024<br>56 | T cell mediated immunity                               | 0.3960343<br>69 | 0.2285849<br>34 | 1 |
| GO:00066<br>37 | acyl-CoA metabolic process                             | 0.3960343<br>69 | 0.2285849<br>34 | 1 |
| GO:00326<br>49 | regulation of interferon-gamma production              | 0.3960343<br>69 | 0.2285849<br>34 | 1 |
| GO:00353<br>83 | thioester metabolic process                            | 0.3960343<br>69 | 0.2285849<br>34 | 1 |
| GO:19016<br>06 | alpha-amino acid catabolic process                     | 0.3960343<br>69 | 0.2285849<br>34 | 1 |
| GO:00026<br>97 | regulation of immune effector process                  | 0.3962503<br>25 | 0.2286366<br>5  | 1 |
| GO:00303<br>01 | cholesterol transport                                  | 0.3989637<br>41 | 0.2298553<br>87 | 1 |
| GO:00482<br>59 | regulation of receptor-mediated endocytosis            | 0.3989637<br>41 | 0.2298553<br>87 | 1 |
| GO:00970<br>06 | regulation of plasma lipoprotein particle levels       | 0.3989637<br>41 | 0.2298553<br>87 | 1 |
| GO:20010<br>22 | positive regulation of response to DNA damage stimulus | 0.3989637<br>41 | 0.2298553<br>87 | 1 |
| GO:00074<br>11 | axon guidance                                          | 0.3989976<br>62 | 0.2298553<br>87 | 1 |
| GO:00974<br>85 | neuron projection guidance                             | 0.4006944<br>57 | 0.2307594<br>13 | 1 |
| GO:00072<br>18 | neuropeptide signaling pathway                         | 0.4018790<br>6  | 0.2312943<br>97 | 1 |
| GO:00344<br>46 | substrate adhesion-dependent cell spreading            | 0.4018790<br>6  | 0.2312943<br>97 | 1 |
| GO:00000<br>18 | regulation of DNA recombination                        | 0.4047803<br>93 | 0.2324466<br>74 | 1 |

|                |                                                           |                 |                 |   |
|----------------|-----------------------------------------------------------|-----------------|-----------------|---|
| GO:00105<br>96 | negative regulation of endothelial cell migration         | 0.4047803<br>93 | 0.2324466<br>74 | 1 |
| GO:00344<br>04 | nucleobase-containing small molecule biosynthetic process | 0.4047803<br>93 | 0.2324466<br>74 | 1 |
| GO:00485<br>24 | positive regulation of viral process                      | 0.4047803<br>93 | 0.2324466<br>74 | 1 |
| GO:00509<br>05 | neuromuscular process                                     | 0.4047803<br>93 | 0.2324466<br>74 | 1 |
| GO:00519<br>83 | regulation of chromosome segregation                      | 0.4047803<br>93 | 0.2324466<br>74 | 1 |
| GO:00991<br>75 | regulation of postsynapse organization                    | 0.4047803<br>93 | 0.2324466<br>74 | 1 |
| GO:00019<br>09 | leukocyte mediated cytotoxicity                           | 0.4076678<br>06 | 0.2338821<br>08 | 1 |
| GO:00072<br>29 | integrin-mediated signaling pathway                       | 0.4076678<br>06 | 0.2338821<br>08 | 1 |
| GO:00085<br>93 | regulation of Notch signaling pathway                     | 0.4076678<br>06 | 0.2338821<br>08 | 1 |
| GO:00109<br>76 | positive regulation of neuron projection development      | 0.4091453<br>47 | 0.2346553<br>85 | 1 |
| GO:00215<br>10 | spinal cord development                                   | 0.4105413<br>66 | 0.2353068<br>73 | 1 |
| GO:00987<br>81 | ncRNA transcription                                       | 0.4105413<br>66 | 0.2353068<br>73 | 1 |
| GO:00104<br>98 | proteasomal protein catabolic process                     | 0.4131538<br>97 | 0.2367210<br>38 | 1 |
| GO:00062<br>89 | nucleotide-excision repair                                | 0.4134011<br>37 | 0.2367210<br>38 | 1 |
| GO:00070<br>41 | lysosomal transport                                       | 0.4134011<br>37 | 0.2367210<br>38 | 1 |
| GO:00608<br>28 | regulation of canonical Wnt signaling pathway             | 0.4175394<br>6  | 0.2390150<br>79 | 1 |
| GO:19035<br>10 | mucopolysaccharide metabolic process                      | 0.4218983<br>77 | 0.2414339<br>06 | 1 |
| GO:00063<br>10 | DNA recombination                                         | 0.4242124<br>45 | 0.2426813<br>96 | 1 |
| GO:00090<br>62 | fatty acid catabolic process                              | 0.4247036<br>48 | 0.2428856<br>12 | 1 |
| GO:00512<br>58 | protein polymerization                                    | 0.4258746<br>8  | 0.2434783<br>65 | 1 |
| GO:00346<br>60 | ncRNA metabolic process                                   | 0.4260613<br>11 | 0.2435081<br>27 | 1 |
| GO:00326<br>09 | interferon-gamma production                               | 0.4274954<br>55 | 0.2442506<br>4  | 1 |

|                |                                                                          |                 |                 |   |
|----------------|--------------------------------------------------------------------------|-----------------|-----------------|---|
| GO:00323<br>92 | DNA geometric change                                                     | 0.4302738<br>63 | 0.2457604<br>9  | 1 |
| GO:00311<br>09 | microtubule polymerization or depolymerization                           | 0.4330389<br>33 | 0.2472617<br>72 | 1 |
| GO:00070<br>52 | mitotic spindle organization                                             | 0.4357907<br>31 | 0.2484442<br>81 | 1 |
| GO:00159<br>18 | sterol transport                                                         | 0.4357907<br>31 | 0.2484442<br>81 | 1 |
| GO:00508<br>68 | negative regulation of T cell activation                                 | 0.4357907<br>31 | 0.2484442<br>81 | 1 |
| GO:00024<br>40 | production of molecular mediator of immune response                      | 0.4357964<br>16 | 0.2484442<br>81 | 1 |
| GO:00302<br>16 | keratinocyte differentiation                                             | 0.4357964<br>16 | 0.2484442<br>81 | 1 |
| GO:00450<br>88 | regulation of innate immune response                                     | 0.4374412<br>88 | 0.2493034<br>64 | 1 |
| GO:00063<br>04 | DNA modification                                                         | 0.4412547<br>59 | 0.2513976<br>31 | 1 |
| GO:00902<br>87 | regulation of cellular response to growth factor stimulus                | 0.4423606<br>19 | 0.2519483<br>47 | 1 |
| GO:00313<br>98 | positive regulation of protein ubiquitination                            | 0.4439671<br>15 | 0.2527837<br>67 | 1 |
| GO:00026<br>98 | negative regulation of immune effector process                           | 0.4520262<br>92 | 0.2571297<br>33 | 1 |
| GO:00090<br>63 | cellular amino acid catabolic process                                    | 0.4520262<br>92 | 0.2571297<br>33 | 1 |
| GO:00106<br>33 | negative regulation of epithelial cell migration                         | 0.4520262<br>92 | 0.2571297<br>33 | 1 |
| GO:00070<br>98 | centrosome cycle                                                         | 0.4546869<br>26 | 0.2583995<br>06 | 1 |
| GO:00073<br>68 | determination of left/right symmetry                                     | 0.4546869<br>26 | 0.2583995<br>06 | 1 |
| GO:00324<br>79 | regulation of type I interferon production                               | 0.4546869<br>26 | 0.2583995<br>06 | 1 |
| GO:00170<br>15 | regulation of transforming growth factor beta receptor signaling pathway | 0.4599699<br>24 | 0.2610738<br>62 | 1 |
| GO:00303<br>26 | embryonic limb morphogenesis                                             | 0.4599699<br>24 | 0.2610738<br>62 | 1 |
| GO:00326<br>06 | type I interferon production                                             | 0.4599699<br>24 | 0.2610738<br>62 | 1 |
| GO:00351<br>13 | embryonic appendage morphogenesis                                        | 0.4599699<br>24 | 0.2610738<br>62 | 1 |
| GO:00000<br>41 | transition metal ion transport                                           | 0.4652022<br>97 | 0.2638781<br>55 | 1 |

|                |                                                                                                 |                 |                 |   |
|----------------|-------------------------------------------------------------------------------------------------|-----------------|-----------------|---|
| GO:19038<br>44 | regulation of cellular response to transforming growth factor beta stimulus                     | 0.4652022<br>97 | 0.2638781<br>55 | 1 |
| GO:00714<br>26 | ribonucleoprotein complex export from nucleus                                                   | 0.4677996<br>49 | 0.2652683<br>03 | 1 |
| GO:00468<br>87 | positive regulation of hormone secretion                                                        | 0.4703845<br>25 | 0.2665669<br>96 | 1 |
| GO:00711<br>66 | ribonucleoprotein complex localization                                                          | 0.4703845<br>25 | 0.2665669<br>96 | 1 |
| GO:00062<br>82 | regulation of DNA repair                                                                        | 0.4729569<br>83 | 0.2679408<br>94 | 1 |
| GO:00901<br>01 | negative regulation of transmembrane receptor protein serine/threonine kinase signaling pathway | 0.4755170<br>84 | 0.2693069<br>32 | 1 |
| GO:00029<br>20 | regulation of humoral immune response                                                           | 0.4780648<br>84 | 0.2704113<br>24 | 1 |
| GO:00074<br>98 | mesoderm development                                                                            | 0.4780648<br>84 | 0.2704113<br>24 | 1 |
| GO:00098<br>55 | determination of bilateral symmetry                                                             | 0.4780648<br>84 | 0.2704113<br>24 | 1 |
| GO:00459<br>95 | regulation of embryonic development                                                             | 0.4780648<br>84 | 0.2704113<br>24 | 1 |
| GO:00097<br>99 | specification of symmetry                                                                       | 0.4806004<br>43 | 0.2715908<br>35 | 1 |
| GO:00157<br>48 | organophosphate ester transport                                                                 | 0.4806004<br>43 | 0.2715908<br>35 | 1 |
| GO:00421<br>57 | lipoprotein metabolic process                                                                   | 0.4806004<br>43 | 0.2715908<br>35 | 1 |
| GO:00310<br>23 | microtubule organizing center organization                                                      | 0.4831238<br>19 | 0.2729315<br>76 | 1 |
| GO:00197<br>30 | antimicrobial humoral response                                                                  | 0.4856350<br>7  | 0.2740935<br>37 | 1 |
| GO:00305<br>34 | adult behavior                                                                                  | 0.4856350<br>7  | 0.2740935<br>37 | 1 |
| GO:00425<br>52 | myelination                                                                                     | 0.4856350<br>7  | 0.2740935<br>37 | 1 |
| GO:00007<br>24 | double-strand break repair via homologous recombination                                         | 0.4881342<br>54 | 0.2749894<br>42 | 1 |
| GO:00338<br>65 | nucleoside bisphosphate metabolic process                                                       | 0.4881342<br>54 | 0.2749894<br>42 | 1 |
| GO:00338<br>75 | ribonucleoside bisphosphate metabolic process                                                   | 0.4881342<br>54 | 0.2749894<br>42 | 1 |
| GO:00340<br>32 | purine nucleoside bisphosphate metabolic process                                                | 0.4881342<br>54 | 0.2749894<br>42 | 1 |
| GO:00463<br>30 | positive regulation of JNK cascade                                                              | 0.4881342<br>54 | 0.2749894<br>42 | 1 |

|                |                                                                                             |                 |                 |   |
|----------------|---------------------------------------------------------------------------------------------|-----------------|-----------------|---|
| GO:00723<br>29 | monocarboxylic acid catabolic process                                                       | 0.4881342<br>54 | 0.2749894<br>42 | 1 |
| GO:00600<br>70 | canonical Wnt signaling pathway                                                             | 0.4886684<br>71 | 0.2752047<br>12 | 1 |
| GO:00160<br>50 | vesicle organization                                                                        | 0.4902232<br>1  | 0.2758752<br>52 | 1 |
| GO:00024<br>33 | immune response-regulating cell surface receptor signaling pathway involved in phagocytosis | 0.4906214<br>27 | 0.2758752<br>52 | 1 |
| GO:00072<br>72 | ensheathment of neurons                                                                     | 0.4906214<br>27 | 0.2758752<br>52 | 1 |
| GO:00083<br>66 | axon ensheathment                                                                           | 0.4906214<br>27 | 0.2758752<br>52 | 1 |
| GO:00380<br>96 | Fc-gamma receptor signaling pathway involved in phagocytosis                                | 0.4906214<br>27 | 0.2758752<br>52 | 1 |
| GO:00007<br>25 | recombinational repair                                                                      | 0.4930966<br>48 | 0.2770948<br>47 | 1 |
| GO:00482<br>84 | organelle fusion                                                                            | 0.4930966<br>48 | 0.2770948<br>47 | 1 |
| GO:00066<br>50 | glycerophospholipid metabolic process                                                       | 0.4948699<br>65 | 0.2780050<br>23 | 1 |
| GO:19033<br>22 | positive regulation of protein modification by small protein conjugation or removal         | 0.4955599<br>72 | 0.2783062<br>47 | 1 |
| GO:00380<br>94 | Fc-gamma receptor signaling pathway                                                         | 0.4980114<br>56 | 0.2795962<br>22 | 1 |
| GO:00064<br>05 | RNA export from nucleus                                                                     | 0.5028791<br>3  | 0.2821539<br>7  | 1 |
| GO:19028<br>50 | microtubule cytoskeleton organization involved in mitosis                                   | 0.5028791<br>3  | 0.2821539<br>7  | 1 |
| GO:00024<br>31 | Fc receptor mediated stimulatory signaling pathway                                          | 0.5052954<br>32 | 0.2834218<br>18 | 1 |
| GO:00444<br>09 | entry into host                                                                             | 0.5100932<br>41 | 0.2860242<br>63 | 1 |
| GO:20012<br>51 | negative regulation of chromosome organization                                              | 0.5124748<br>6  | 0.2872706<br>85 | 1 |
| GO:00030<br>02 | regionalization                                                                             | 0.5131912<br>85 | 0.2874941<br>56 | 1 |
| GO:00711<br>03 | DNA conformation change                                                                     | 0.5131912<br>85 | 0.2874941<br>56 | 1 |
| GO:00070<br>34 | vacuolar transport                                                                          | 0.5172037<br>97 | 0.2893836<br>3  | 1 |
| GO:00351<br>07 | appendage morphogenesis                                                                     | 0.5172037<br>97 | 0.2893836<br>3  | 1 |
| GO:00351<br>08 | limb morphogenesis                                                                          | 0.5172037<br>97 | 0.2893836<br>3  | 1 |

|                |                                                                |                 |                 |   |
|----------------|----------------------------------------------------------------|-----------------|-----------------|---|
| GO:19050<br>39 | carboxylic acid transmembrane transport                        | 0.5172037<br>97 | 0.2893836<br>3  | 1 |
| GO:00355<br>67 | non-canonical Wnt signaling pathway                            | 0.5195512<br>25 | 0.2905173<br>88 | 1 |
| GO:19038<br>25 | organic acid transmembrane transport                           | 0.5195512<br>25 | 0.2905173<br>88 | 1 |
| GO:00018<br>18 | negative regulation of cytokine production                     | 0.5206976<br>85 | 0.2910685<br>07 | 1 |
| GO:00076<br>05 | sensory perception of sound                                    | 0.5218873<br>64 | 0.2915533<br>96 | 1 |
| GO:00506<br>84 | regulation of mRNA processing                                  | 0.5218873<br>64 | 0.2915533<br>96 | 1 |
| GO:00311<br>23 | RNA 3'-end processing                                          | 0.5242122<br>67 | 0.2927618<br>22 | 1 |
| GO:00109<br>77 | negative regulation of neuron projection development           | 0.5265259<br>9  | 0.2938725<br>86 | 1 |
| GO:00512<br>50 | negative regulation of lymphocyte activation                   | 0.5265259<br>9  | 0.2938725<br>86 | 1 |
| GO:00099<br>13 | epidermal cell differentiation                                 | 0.5281279<br>42 | 0.2946757<br>98 | 1 |
| GO:00024<br>55 | humoral immune response mediated by circulating immunoglobulin | 0.5288285<br>83 | 0.2948848<br>71 | 1 |
| GO:00507<br>73 | regulation of dendrite development                             | 0.5288285<br>83 | 0.2948848<br>71 | 1 |
| GO:00344<br>01 | chromatin organization involved in regulation of transcription | 0.5311201<br>02 | 0.2960714<br>26 | 1 |
| GO:00070<br>18 | microtubule-based movement                                     | 0.5325492<br>62 | 0.2967766<br>79 | 1 |
| GO:00302<br>03 | glycosaminoglycan metabolic process                            | 0.5356701<br>22 | 0.2984239<br>5  | 1 |
| GO:00322<br>59 | methylation                                                    | 0.5369427<br>92 | 0.2990408<br>9  | 1 |
| GO:00507<br>77 | negative regulation of immune response                         | 0.5379287<br>29 | 0.2994056<br>84 | 1 |
| GO:19026<br>00 | proton transmembrane transport                                 | 0.5379287<br>29 | 0.2994056<br>84 | 1 |
| GO:19029<br>03 | regulation of supramolecular fiber organization                | 0.5398563<br>11 | 0.3003861<br>58 | 1 |
| GO:00000<br>70 | mitotic sister chromatid segregation                           | 0.5424133<br>96 | 0.3016234<br>68 | 1 |
| GO:00007<br>23 | telomere maintenance                                           | 0.5424133<br>96 | 0.3016234<br>68 | 1 |
| GO:00164<br>82 | cytosolic transport                                            | 0.5512539<br>81 | 0.3064453<br>37 | 1 |



|                |                                                                    |                 |                 |   |
|----------------|--------------------------------------------------------------------|-----------------|-----------------|---|
| GO:00485<br>15 | spermatid differentiation                                          | 0.5534376<br>02 | 0.3075647<br>35 | 1 |
| GO:00521<br>26 | movement in host environment                                       | 0.5599256<br>07 | 0.3109793<br>28 | 1 |
| GO:00610<br>25 | membrane fusion                                                    | 0.5599256<br>07 | 0.3109793<br>28 | 1 |
| GO:00009<br>10 | cytokinesis                                                        | 0.5663203<br>7  | 0.3142415<br>84 | 1 |
| GO:00019<br>06 | cell killing                                                       | 0.5663203<br>7  | 0.3142415<br>84 | 1 |
| GO:00060<br>22 | aminoglycan metabolic process                                      | 0.5663203<br>7  | 0.3142415<br>84 | 1 |
| GO:00091<br>52 | purine ribonucleotide biosynthetic process                         | 0.5684314<br>67 | 0.3151230<br>95 | 1 |
| GO:00509<br>54 | sensory perception of mechanical stimulus                          | 0.5684314<br>67 | 0.3151230<br>95 | 1 |
| GO:00991<br>73 | postsynapse organization                                           | 0.5684314<br>67 | 0.3151230<br>95 | 1 |
| GO:00313<br>46 | positive regulation of cell projection organization                | 0.5696915<br>54 | 0.3157249<br>23 | 1 |
| GO:00308<br>33 | regulation of actin filament polymerization                        | 0.5705324       | 0.3159973<br>56 | 1 |
| GO:00322<br>00 | telomere organization                                              | 0.5705324       | 0.3159973<br>56 | 1 |
| GO:01400<br>13 | meiotic nuclear division                                           | 0.5767746<br>96 | 0.3193569<br>87 | 1 |
| GO:00344<br>70 | ncRNA processing                                                   | 0.5779597<br>64 | 0.3199152<br>59 | 1 |
| GO:00190<br>83 | viral transcription                                                | 0.5788354<br>54 | 0.3203019<br>94 | 1 |
| GO:00329<br>70 | regulation of actin filament-based process                         | 0.5847623<br>41 | 0.3233934<br>54 | 1 |
| GO:00487<br>36 | appendage development                                              | 0.5849583<br>69 | 0.3233934<br>54 | 1 |
| GO:00601<br>73 | limb development                                                   | 0.5849583<br>69 | 0.3233934<br>54 | 1 |
| GO:00902<br>88 | negative regulation of cellular response to growth factor stimulus | 0.5869797<br>12 | 0.3244118<br>33 | 1 |
| GO:00070<br>51 | spindle organization                                               | 0.5889913<br>18 | 0.3253248<br>75 | 1 |
| GO:01200<br>32 | regulation of plasma membrane bounded cell projection assembly     | 0.5889913<br>18 | 0.3253248<br>75 | 1 |
| GO:00026<br>95 | negative regulation of leukocyte activation                        | 0.5909932<br>34 | 0.3262314<br>53 | 1 |

|                |                                                        |                 |                 |   |
|----------------|--------------------------------------------------------|-----------------|-----------------|---|
| GO:00074<br>16 | synapse assembly                                       | 0.5909932<br>34 | 0.3262314<br>53 | 1 |
| GO:00604<br>91 | regulation of cell projection assembly                 | 0.5929855<br>05 | 0.3272313<br>71 | 1 |
| GO:00092<br>60 | ribonucleotide biosynthetic process                    | 0.5949681<br>78 | 0.3282253<br>85 | 1 |
| GO:00091<br>00 | glycoprotein metabolic process                         | 0.5981279<br>54 | 0.3298679<br>65 | 1 |
| GO:00080<br>64 | regulation of actin polymerization or depolymerization | 0.6028038       | 0.3323454<br>03 | 1 |
| GO:00308<br>32 | regulation of actin filament length                    | 0.6047391<br>64 | 0.3333108<br>75 | 1 |
| GO:00219<br>53 | central nervous system neuron differentiation          | 0.6066652<br>01 | 0.3341688<br>63 | 1 |
| GO:00442<br>72 | sulfur compound biosynthetic process                   | 0.6066652<br>01 | 0.3341688<br>63 | 1 |
| GO:00300<br>41 | actin filament polymerization                          | 0.6085819<br>55 | 0.3350206<br>97 | 1 |
| GO:19030<br>46 | meiotic cell cycle process                             | 0.6085819<br>55 | 0.3350206<br>97 | 1 |
| GO:00463<br>90 | ribose phosphate biosynthetic process                  | 0.6104894<br>71 | 0.3357643<br>26 | 1 |
| GO:00465<br>78 | regulation of Ras protein signal transduction          | 0.6104894<br>71 | 0.3357643<br>26 | 1 |
| GO:19021<br>15 | regulation of organelle assembly                       | 0.6104894<br>71 | 0.3357643<br>26 | 1 |
| GO:00072<br>19 | Notch signaling pathway                                | 0.6123877<br>92 | 0.3365015<br>47 | 1 |
| GO:00190<br>80 | viral gene expression                                  | 0.6123877<br>92 | 0.3365015<br>47 | 1 |
| GO:00314<br>97 | chromatin assembly                                     | 0.6123877<br>92 | 0.3365015<br>47 | 1 |
| GO:00008<br>19 | sister chromatid segregation                           | 0.6142769<br>63 | 0.3374371<br>58 | 1 |
| GO:00506<br>57 | nucleic acid transport                                 | 0.6217430<br>11 | 0.3413311<br>95 | 1 |
| GO:00506<br>58 | RNA transport                                          | 0.6217430<br>11 | 0.3413311<br>95 | 1 |
| GO:00070<br>15 | actin filament organization                            | 0.6226414<br>22 | 0.3416171<br>22 | 1 |
| GO:00464<br>86 | glycerolipid metabolic process                         | 0.6226414<br>22 | 0.3416171<br>22 | 1 |
| GO:19016<br>05 | alpha-amino acid metabolic process                     | 0.6254222<br>57 | 0.3430388<br>35 | 1 |

|                |                                                           |                 |                 |   |
|----------------|-----------------------------------------------------------|-----------------|-----------------|---|
| GO:00512<br>36 | establishment of RNA localization                         | 0.6272485<br>84 | 0.3439363<br>05 | 1 |
| GO:00603<br>48 | bone development                                          | 0.6290661<br>05 | 0.3448284<br>04 | 1 |
| GO:00068<br>88 | endoplasmic reticulum to Golgi vesicle-mediated transport | 0.6326748<br>91 | 0.3465965<br>99 | 1 |
| GO:00508<br>52 | T cell receptor signaling pathway                         | 0.6326748<br>91 | 0.3465965<br>99 | 1 |
| GO:00301<br>00 | regulation of endocytosis                                 | 0.6397886<br>12 | 0.3503876<br>08 | 1 |
| GO:00516<br>50 | establishment of vesicle localization                     | 0.6432942<br>04 | 0.3522008<br>88 | 1 |
| GO:00063<br>38 | chromatin remodeling                                      | 0.6536097<br>92 | 0.3576322<br>1  | 1 |
| GO:00718<br>05 | potassium ion transmembrane transport                     | 0.6536097<br>92 | 0.3576322<br>1  | 1 |
| GO:00099<br>52 | anterior/posterior pattern specification                  | 0.6553001<br>34 | 0.3584487<br>15 | 1 |
| GO:00063<br>33 | chromatin assembly or disassembly                         | 0.6569823<br>18 | 0.3591517<br>27 | 1 |
| GO:00171<br>48 | negative regulation of translation                        | 0.6569823<br>18 | 0.3591517<br>27 | 1 |
| GO:00081<br>54 | actin polymerization or depolymerization                  | 0.6586563<br>83 | 0.3599581<br>37 | 1 |
| GO:00435<br>83 | ear development                                           | 0.6636302<br>46 | 0.3625668<br>68 | 1 |
| GO:00080<br>37 | cell recognition                                          | 0.6669062<br>63 | 0.3642467<br>05 | 1 |
| GO:00063<br>64 | rRNA processing                                           | 0.6685324<br>19 | 0.3650246<br>89 | 1 |
| GO:00487<br>05 | skeletal system morphogenesis                             | 0.6701507<br>22 | 0.3657979<br>17 | 1 |
| GO:00516<br>48 | vesicle localization                                      | 0.6717612<br>1  | 0.3665664<br>15 | 1 |
| GO:00064<br>57 | protein folding                                           | 0.6733639<br>21 | 0.3672194<br>98 | 1 |
| GO:00464<br>74 | glycerophospholipid biosynthetic process                  | 0.6733639<br>21 | 0.3672194<br>98 | 1 |
| GO:00512<br>59 | protein complex oligomerization                           | 0.6749588<br>92 | 0.3679784<br>13 | 1 |
| GO:00226<br>18 | ribonucleoprotein complex assembly                        | 0.6781257<br>62 | 0.3695935<br>91 | 1 |
| GO:00064<br>03 | RNA localization                                          | 0.6828189<br>35 | 0.3720394<br>14 | 1 |

|                |                                                                                        |                 |                 |   |
|----------------|----------------------------------------------------------------------------------------|-----------------|-----------------|---|
| GO:00160<br>72 | rRNA metabolic process                                                                 | 0.6859100<br>52 | 0.3734987<br>03 | 1 |
| GO:00342<br>49 | negative regulation of cellular amide metabolic process                                | 0.6859100<br>52 | 0.3734987<br>03 | 1 |
| GO:00718<br>26 | ribonucleoprotein complex subunit organization                                         | 0.6889713<br>72 | 0.3750528<br>18 | 1 |
| GO:00513<br>21 | meiotic cell cycle                                                                     | 0.7095898<br>26 | 0.3860445<br>33 | 1 |
| GO:00900<br>92 | regulation of transmembrane receptor protein serine/threonine kinase signaling pathway | 0.7095898<br>26 | 0.3860445<br>33 | 1 |
| GO:00159<br>31 | nucleobase-containing compound transport                                               | 0.7193861<br>3  | 0.3912564<br>68 | 1 |
| GO:00450<br>17 | glycerolipid biosynthetic process                                                      | 0.7315024<br>87 | 0.3977267<br>13 | 1 |
| GO:00086<br>54 | phospholipid biosynthetic process                                                      | 0.7328163<br>87 | 0.3983214<br>08 | 1 |
| GO:00988<br>13 | nuclear chromosome segregation                                                         | 0.7341239<br>27 | 0.3989122<br>9  | 1 |
| GO:00987<br>42 | cell-cell adhesion via plasma-membrane adhesion molecules                              | 0.7405672<br>98 | 0.4022927<br>16 | 1 |
| GO:01100<br>53 | regulation of actin filament organization                                              | 0.7418373<br>17 | 0.4028616<br>76 | 1 |
| GO:00315<br>03 | protein-containing complex localization                                                | 0.7577985<br>59 | 0.4114061<br>06 | 1 |
| GO:00485<br>62 | embryonic organ morphogenesis                                                          | 0.7705389<br>9  | 0.4181973<br>68 | 1 |
| GO:00422<br>54 | ribosome biogenesis                                                                    | 0.7793862<br>2  | 0.4228722<br>2  | 1 |
| GO:00986<br>56 | anion transmembrane transport                                                          | 0.7847435<br>25 | 0.4256513<br>06 | 1 |
| GO:00434<br>14 | macromolecule methylation                                                              | 0.7878959<br>35 | 0.4272331<br>32 | 1 |
| GO:00510<br>56 | regulation of small GTPase mediated signal transduction                                | 0.7930487<br>94 | 0.4298984<br>19 | 1 |
| GO:00070<br>59 | chromosome segregation                                                                 | 0.8039533<br>03 | 0.4356790<br>49 | 1 |
| GO:00002<br>09 | protein polyubiquitination                                                             | 0.8096596<br>55 | 0.4385087<br>81 | 1 |
| GO:00065<br>20 | cellular amino acid metabolic process                                                  | 0.8096596<br>55 | 0.4385087<br>81 | 1 |
| GO:00091<br>01 | glycoprotein biosynthetic process                                                      | 0.8115250<br>22 | 0.4393875<br>44 | 1 |
| GO:00329<br>56 | regulation of actin cytoskeleton organization                                          | 0.8275200<br>98 | 0.4479138<br>02 | 1 |

|                |                                      |                 |                 |   |
|----------------|--------------------------------------|-----------------|-----------------|---|
| GO:00067<br>90 | sulfur compound metabolic process    | 0.8366260<br>03 | 0.4527071<br>58 | 1 |
| GO:00481<br>93 | Golgi vesicle transport              | 0.8390258<br>09 | 0.4538699<br>91 | 1 |
| GO:00066<br>05 | protein targeting                    | 0.8861054<br>63 | 0.4791944<br>16 | 1 |
| GO:00076<br>08 | sensory perception of smell          | 0.8905301<br>17 | 0.4814433<br>26 | 1 |
| GO:00226<br>13 | ribonucleoprotein complex biogenesis | 0.9056597<br>7  | 0.4894765<br>6  | 1 |

**Table S2.** Results of CC GO terms enrichment of *Scutellaria baicalensis* in breast cancer.

| ID         | Description                                        | pvalue      | qvalue      | Count |
|------------|----------------------------------------------------|-------------|-------------|-------|
| GO:0045121 | membrane raft                                      | 4.02216E-09 | 3.66649E-07 | 13    |
| GO:0098857 | membrane microdomain                               | 4.17145E-09 | 3.66649E-07 | 13    |
| GO:0098589 | membrane region                                    | 6.62638E-09 | 3.88282E-07 | 13    |
| GO:0042734 | presynaptic membrane                               | 4.64859E-08 | 1.83355E-06 | 10    |
| GO:0099056 | integral component of presynaptic membrane         | 5.21519E-08 | 1.83355E-06 | 9     |
| GO:0098889 | intrinsic component of presynaptic membrane        | 1.16317E-07 | 3.40789E-06 | 9     |
| GO:0099055 | integral component of postsynaptic membrane        | 1.22265E-06 | 3.07043E-05 | 8     |
| GO:0098936 | intrinsic component of postsynaptic membrane       | 1.62059E-06 | 3.56104E-05 | 8     |
| GO:0005901 | caveola                                            | 2.26278E-06 | 4.41969E-05 | 8     |
| GO:0099699 | integral component of synaptic membrane            | 7.61425E-06 | 0.000126047 | 8     |
| GO:0031968 | organelle outer membrane                           | 8.04921E-06 | 0.000126047 | 8     |
| GO:0019867 | outer membrane                                     | 8.60442E-06 | 0.000126047 | 7     |
| GO:0099240 | intrinsic component of synaptic membrane           | 1.24327E-05 | 0.00015894  | 7     |
| GO:0097060 | synaptic membrane                                  | 1.26581E-05 | 0.00015894  | 7     |
| GO:0044853 | plasma membrane raft                               | 1.45482E-05 | 0.000170495 | 7     |
| GO:0005741 | mitochondrial outer membrane                       | 3.17801E-05 | 0.000349163 | 7     |
| GO:0045211 | postsynaptic membrane                              | 4.85648E-05 | 0.000502187 | 7     |
| GO:0005667 | transcription regulator complex                    | 0.000130061 | 0.001270191 | 7     |
| GO:0098978 | glutamatergic synapse                              | 0.000279469 | 0.002585673 | 7     |
| GO:0034399 | nuclear periphery                                  | 0.000366184 | 0.003218569 | 7     |
| GO:0042383 | sarcolemma                                         | 0.00042043  | 0.003519391 | 6     |
| GO:0060205 | cytoplasmic vesicle lumen                          | 0.00081931  | 0.006489825 | 6     |
| GO:0031983 | vesicle lumen                                      | 0.000849118 | 0.006489825 | 6     |
| GO:0090575 | RNA polymerase II transcription regulator complex  | 0.000934121 | 0.006842024 | 6     |
| GO:0000307 | cyclin-dependent protein kinase holoenzyme complex | 0.001050845 | 0.007389098 | 5     |
| GO:0098691 | dopaminergic synapse                               | 0.001615165 | 0.010561098 | 5     |
| GO:0005635 | nuclear envelope                                   | 0.001622109 | 0.010561098 | 5     |
| GO:0030315 | T-tubule                                           | 0.002035625 | 0.012780054 | 5     |
| GO:0031965 | nuclear membrane                                   | 0.002820252 | 0.017095536 | 5     |
| GO:0031093 | platelet alpha granule lumen                       | 0.003764251 | 0.022057189 | 4     |
| GO:0034774 | secretory granule lumen                            | 0.003925275 | 0.022258777 | 4     |
| GO:0046930 | pore complex                                       | 0.005082967 | 0.02792288  | 4     |
| GO:0032809 | neuronal cell body membrane                        | 0.007480715 | 0.039849423 | 4     |
| GO:0120111 | neuron projection cytoplasm                        | 0.007791766 | 0.0402856   | 4     |
| GO:1902554 | serine/threonine protein kinase complex            | 0.008292834 | 0.041651228 | 4     |
| GO:0031091 | platelet alpha granule                             | 0.008812476 | 0.043031682 | 4     |
| GO:0044298 | cell body membrane                                 | 0.009119741 | 0.0433285   | 4     |
| GO:0032839 | dendrite cytoplasm                                 | 0.010903724 | 0.050441049 | 4     |
| GO:1902911 | protein kinase complex                             | 0.012651981 | 0.057027824 | 4     |
| GO:0016363 | nuclear matrix                                     | 0.014345947 | 0.06304666  | 3     |
| GO:0034703 | cation channel complex                             | 0.019752972 | 0.082446891 | 3     |

|            |                                                                |             |             |   |
|------------|----------------------------------------------------------------|-------------|-------------|---|
| GO:0101002 | ficolin-1-rich granule                                         | 0.020167398 | 0.082446891 | 3 |
| GO:1904813 | ficolin-1-rich granule lumen                                   | 0.020167398 | 0.082446891 | 3 |
| GO:0099061 | integral component of postsynaptic density membrane            | 0.023550587 | 0.094089666 | 3 |
| GO:0099146 | intrinsic component of postsynaptic density membrane           | 0.026196402 | 0.102334482 | 3 |
| GO:1904724 | tertiary granule lumen                                         | 0.027103969 | 0.103578097 | 3 |
| GO:0061695 | transferase complex, transferring phosphorus-containing groups | 0.030473829 | 0.113978264 | 3 |
| GO:0072562 | blood microparticle                                            | 0.031811899 | 0.116504104 | 3 |
| GO:0070820 | tertiary granule                                               | 0.041156192 | 0.147649496 | 3 |
| GO:0098981 | cholinergic synapse                                            | 0.045574055 | 0.15703743  | 3 |
| GO:0099060 | integral component of postsynaptic specialization membrane     | 0.046591354 | 0.15703743  | 3 |
| GO:0005775 | vacuolar lumen                                                 | 0.046955673 | 0.15703743  | 3 |
| GO:0017053 | transcription repressor complex                                | 0.048871309 | 0.15703743  | 3 |
| GO:0062023 | collagen-containing extracellular matrix                       | 0.049067084 | 0.15703743  | 3 |
| GO:0005652 | nuclear lamina                                                 | 0.050016879 | 0.15703743  | 3 |
| GO:0098948 | intrinsic component of postsynaptic specialization membrane    | 0.050026295 | 0.15703743  | 3 |
| GO:0034702 | ion channel complex                                            | 0.050927576 | 0.157061962 | 3 |
| GO:0030877 | beta-catenin destruction complex                               | 0.054439247 | 0.159497444 | 3 |
| GO:1990454 | L-type voltage-gated calcium channel complex                   | 0.054439247 | 0.159497444 | 3 |
| GO:1990909 | Wnt signalosome                                                | 0.054439247 | 0.159497444 | 3 |
| GO:0005788 | endoplasmic reticulum lumen                                    | 0.05563261  | 0.160321757 | 3 |
| GO:0098685 | Schaffer collateral - CA1 synapse                              | 0.058380686 | 0.161619892 | 3 |
| GO:0033391 | chromatoid body                                                | 0.058841254 | 0.161619892 | 2 |
| GO:0044292 | dendrite terminus                                              | 0.058841254 | 0.161619892 | 2 |
| GO:0000940 | condensed chromosome outer kinetochore                         | 0.063222992 | 0.168875319 | 2 |
| GO:1902495 | transmembrane transporter complex                              | 0.063404087 | 0.168875319 | 2 |
| GO:0035578 | azurophil granule lumen                                        | 0.067179564 | 0.17444094  | 2 |
| GO:1990351 | transporter complex                                            | 0.06808959  | 0.17444094  | 2 |
| GO:0098839 | postsynaptic density membrane                                  | 0.068470681 | 0.17444094  | 2 |
| GO:0014069 | postsynaptic density                                           | 0.072333495 | 0.176361972 | 2 |
| GO:0032838 | plasma membrane bounded cell projection cytoplasm              | 0.075532841 | 0.176361972 | 2 |
| GO:0032279 | asymmetric synapse                                             | 0.076076985 | 0.176361972 | 2 |
| GO:0000778 | condensed nuclear chromosome kinetochore                       | 0.076247511 | 0.176361972 | 2 |
| GO:0001518 | voltage-gated sodium channel complex                           | 0.076247511 | 0.176361972 | 2 |
| GO:0043083 | synaptic cleft                                                 | 0.076247511 | 0.176361972 | 2 |
| GO:0043194 | axon initial segment                                           | 0.076247511 | 0.176361972 | 2 |
| GO:0005911 | cell-cell junction                                             | 0.080010581 | 0.181534389 | 2 |
| GO:0097440 | apical dendrite                                                | 0.080549091 | 0.181534389 | 2 |
| GO:0000794 | condensed nuclear chromosome                                   | 0.083193345 | 0.182806429 | 2 |
| GO:0005604 | basement membrane                                              | 0.083193345 | 0.182806429 | 2 |
| GO:0000159 | protein phosphatase type 2A complex                            | 0.084830859 | 0.18410336  | 2 |
| GO:0099572 | postsynaptic specialization                                    | 0.08788261  | 0.18840046  | 2 |
| GO:0071682 | endocytic vesicle lumen                                        | 0.089092906 | 0.188693916 | 2 |
| GO:0098984 | neuron to neuron synapse                                       | 0.092701629 | 0.193027846 | 2 |

|            |                                                  |             |             |   |
|------------|--------------------------------------------------|-------------|-------------|---|
| GO:0005697 | telomerase holoenzyme complex                    | 0.093335321 | 0.193027846 | 2 |
| GO:0030687 | preribosome, large subunit precursor             | 0.101761613 | 0.208007214 | 2 |
| GO:0099634 | postsynaptic specialization membrane             | 0.104638306 | 0.211428882 | 2 |
| GO:0035327 | transcriptionally active chromatin               | 0.105945668 | 0.211637877 | 2 |
| GO:0034706 | sodium channel complex                           | 0.114256036 | 0.224644757 | 2 |
| GO:0099568 | cytoplasmic region                               | 0.115012735 | 0.224644757 | 2 |
| GO:0001891 | phagocytic cup                                   | 0.118382524 | 0.226200018 | 2 |
| GO:0034364 | high-density lipoprotein particle                | 0.118382524 | 0.226200018 | 2 |
| GO:0030018 | Z disc                                           | 0.11967757  | 0.226215666 | 2 |
| GO:0005640 | nuclear outer membrane                           | 0.122489999 | 0.227134243 | 2 |
| GO:0043679 | axon terminus                                    | 0.122747697 | 0.227134243 | 2 |
| GO:0031674 | I band                                           | 0.13837551  | 0.251417879 | 2 |
| GO:0000780 | condensed nuclear chromosome, centromeric region | 0.138731482 | 0.251417879 | 2 |
| GO:0005669 | transcription factor TFIID complex               | 0.146740373 | 0.260559727 | 2 |
| GO:0005719 | nuclear euchromatin                              | 0.146740373 | 0.260559727 | 1 |
| GO:0044306 | neuron projection terminus                       | 0.152791731 | 0.266571986 | 1 |
| GO:0034358 | plasma lipoprotein particle                      | 0.154675601 | 0.266571986 | 1 |
| GO:1990777 | lipoprotein particle                             | 0.154675601 | 0.266571986 | 1 |
| GO:0043198 | dendritic shaft                                  | 0.162537836 | 0.272157877 | 1 |
| GO:0005766 | primary lysosome                                 | 0.162561366 | 0.272157877 | 1 |
| GO:0042582 | azurophil granule                                | 0.162561366 | 0.272157877 | 1 |
| GO:0043204 | perikaryon                                       | 0.164200762 | 0.27230911  | 1 |
| GO:0032994 | protein-lipid complex                            | 0.166441788 | 0.273445929 | 1 |
| GO:0150034 | distal axon                                      | 0.174229708 | 0.282940811 | 1 |
| GO:0000781 | chromosome, telomeric region                     | 0.17741905  | 0.282940811 | 1 |
| GO:0000791 | euchromatin                                      | 0.178045975 | 0.282940811 | 1 |
| GO:0000922 | spindle pole                                     | 0.179083314 | 0.282940811 | 1 |
| GO:0005891 | voltage-gated calcium channel complex            | 0.181878419 | 0.282940811 | 1 |
| GO:0032590 | dendrite membrane                                | 0.181878419 | 0.282940811 | 1 |
| GO:0043209 | myelin sheath                                    | 0.197032264 | 0.303826298 | 1 |
| GO:0008287 | protein serine/threonine phosphatase complex     | 0.211908446 | 0.313035917 | 1 |
| GO:0009925 | basal plasma membrane                            | 0.211908446 | 0.313035917 | 1 |
| GO:0014704 | intercalated disc                                | 0.211908446 | 0.313035917 | 1 |
| GO:0098878 | neurotransmitter receptor complex                | 0.211908446 | 0.313035917 | 1 |
| GO:1903293 | phosphatase complex                              | 0.211908446 | 0.313035917 | 1 |
| GO:0005782 | peroxisomal matrix                               | 0.215584698 | 0.31320265  | 1 |
| GO:0031907 | microbody lumen                                  | 0.215584698 | 0.31320265  | 1 |
| GO:0098687 | chromosomal region                               | 0.222883761 | 0.318545385 | 1 |
| GO:0032154 | cleavage furrow                                  | 0.222886397 | 0.318545385 | 1 |
| GO:1904115 | axon cytoplasm                                   | 0.233713084 | 0.331325001 | 1 |
| GO:0005819 | spindle                                          | 0.243818993 | 0.337838653 | 1 |
| GO:0005637 | nuclear inner membrane                           | 0.24439057  | 0.337838653 | 1 |
| GO:0032993 | protein-DNA complex                              | 0.247101393 | 0.337838653 | 1 |



|            |                                             |             |             |   |
|------------|---------------------------------------------|-------------|-------------|---|
| GO:0032589 | neuron projection membrane                  | 0.247916928 | 0.337838653 | 1 |
| GO:0035861 | site of double-strand break                 | 0.247916928 | 0.337838653 | 1 |
| GO:0030017 | sarcomere                                   | 0.250546735 | 0.33879599  | 1 |
| GO:0005769 | early endosome                              | 0.2562852   | 0.343910232 | 1 |
| GO:0016328 | lateral plasma membrane                     | 0.26186033  | 0.348729467 | 1 |
| GO:0034704 | calcium channel complex                     | 0.268735845 | 0.355194984 | 1 |
| GO:0044304 | main axon                                   | 0.272149812 | 0.356834412 | 1 |
| GO:0045178 | basal part of cell                          | 0.275548015 | 0.356834412 | 1 |
| GO:0000793 | condensed chromosome                        | 0.276416242 | 0.356834412 | 1 |
| GO:0005657 | replication fork                            | 0.282297415 | 0.356834412 | 1 |
| GO:0016529 | sarcoplasmic reticulum                      | 0.282297415 | 0.356834412 | 1 |
| GO:0030016 | myofibril                                   | 0.285037082 | 0.356834412 | 1 |
| GO:0032153 | cell division site                          | 0.285648756 | 0.356834412 | 1 |
| GO:0016607 | nuclear speck                               | 0.286540008 | 0.356834412 | 1 |
| GO:0070821 | tertiary granule membrane                   | 0.28898462  | 0.356834412 | 1 |
| GO:0044291 | cell-cell contact zone                      | 0.292305075 | 0.356834412 | 1 |
| GO:0098982 | GABA-ergic synapse                          | 0.292305075 | 0.356834412 | 1 |
| GO:0031594 | neuromuscular junction                      | 0.298900046 | 0.362368839 | 1 |
| GO:0043292 | contractile fiber                           | 0.303966926 | 0.362784608 | 1 |
| GO:0005925 | focal adhesion                              | 0.304336974 | 0.362784608 | 1 |
| GO:0030684 | preribosome                                 | 0.305434227 | 0.362784608 | 1 |
| GO:0016591 | RNA polymerase II, holoenzyme               | 0.308678695 | 0.363113733 | 1 |
| GO:0005758 | mitochondrial intermembrane space           | 0.311908174 | 0.363113733 | 1 |
| GO:0016528 | sarcoplasm                                  | 0.311908174 | 0.363113733 | 1 |
| GO:0030055 | cell-substrate junction                     | 0.314534455 | 0.363361904 | 1 |
| GO:0016323 | basolateral plasma membrane                 | 0.317683524 | 0.363361904 | 1 |
| GO:0090734 | site of DNA damage                          | 0.318322435 | 0.363361904 | 1 |
| GO:0008076 | voltage-gated potassium channel complex     | 0.33721252  | 0.382441364 | 1 |
| GO:0001750 | photoreceptor outer segment                 | 0.340310135 | 0.383480382 | 1 |
| GO:0031970 | organelle envelope lumen                    | 0.343393432 | 0.384490131 | 1 |
| GO:0035579 | specific granule membrane                   | 0.346462475 | 0.385471241 | 1 |
| GO:1905368 | peptidase complex                           | 0.34951733  | 0.386424323 | 1 |
| GO:0034705 | potassium channel complex                   | 0.361596161 | 0.394812415 | 1 |
| GO:0043202 | lysosomal lumen                             | 0.361596161 | 0.394812415 | 1 |
| GO:0070469 | respirasome                                 | 0.376383166 | 0.399442072 | 1 |
| GO:0005759 | mitochondrial matrix                        | 0.378229003 | 0.399442072 | 1 |
| GO:0016605 | PML body                                    | 0.379299659 | 0.399442072 | 1 |
| GO:0005796 | Golgi lumen                                 | 0.382202662 | 0.399442072 | 1 |
| GO:0055029 | nuclear DNA-directed RNA polymerase complex | 0.382202662 | 0.399442072 | 1 |
| GO:0000428 | DNA-directed RNA polymerase complex         | 0.385092237 | 0.399442072 | 1 |
| GO:0042470 | melanosome                                  | 0.387968444 | 0.399442072 | 1 |
| GO:0048770 | pigment granule                             | 0.387968444 | 0.399442072 | 1 |
| GO:0000777 | condensed chromosome kinetochore            | 0.390831344 | 0.399442072 | 1 |

|            |                                                      |             |             |   |
|------------|------------------------------------------------------|-------------|-------------|---|
| GO:0030175 | filopodium                                           | 0.390831344 | 0.399442072 | 1 |
| GO:0030863 | cortical cytoskeleton                                | 0.390831344 | 0.399442072 | 1 |
| GO:0030880 | RNA polymerase complex                               | 0.396517471 | 0.402910968 | 1 |
| GO:0022626 | cytosolic ribosome                                   | 0.402151099 | 0.406286954 | 1 |
| GO:0098802 | plasma membrane signaling receptor complex           | 0.419403855 | 0.420958119 | 1 |
| GO:0097733 | photoreceptor cell cilium                            | 0.42146226  | 0.420958119 | 1 |
| GO:0030665 | clathrin-coated vesicle membrane                     | 0.424170157 | 0.421269201 | 1 |
| GO:0000779 | condensed chromosome, centromeric region             | 0.434876959 | 0.427077049 | 1 |
| GO:0005923 | bicellular tight junction                            | 0.434876959 | 0.427077049 | 1 |
| GO:0070160 | tight junction                                       | 0.453142153 | 0.442542336 | 1 |
| GO:0005793 | endoplasmic reticulum-Golgi intermediate compartment | 0.45570335  | 0.442584818 | 1 |
| GO:0000776 | kinetochore                                          | 0.473302563 | 0.452182654 | 1 |
| GO:0005777 | peroxisome                                           | 0.473302563 | 0.452182654 | 1 |
| GO:0042579 | microbody                                            | 0.473302563 | 0.452182654 | 1 |
| GO:0097731 | 9+0 non-motile cilium                                | 0.478226712 | 0.454285067 | 1 |
| GO:0045335 | phagocytic vesicle                                   | 0.480671684 | 0.454285067 | 1 |
| GO:0043296 | apical junction complex                              | 0.48793882  | 0.458687211 | 1 |
| GO:0016324 | apical plasma membrane                               | 0.502858043 | 0.47019761  | 1 |
| GO:0036064 | ciliary basal body                                   | 0.516015148 | 0.479947255 | 1 |
| GO:0005875 | microtubule associated complex                       | 0.525031252 | 0.485270246 | 1 |
| GO:0042581 | specific granule                                     | 0.527259199 | 0.485270246 | 1 |
| GO:0005912 | adherens junction                                    | 0.540411464 | 0.494185238 | 1 |
| GO:0097730 | non-motile cilium                                    | 0.542568045 | 0.494185238 | 1 |
| GO:0031225 | anchored component of membrane                       | 0.551094734 | 0.499364192 | 1 |
| GO:0031256 | leading edge membrane                                | 0.559464198 | 0.501775086 | 1 |
| GO:0043197 | dendritic spine                                      | 0.559464198 | 0.501775086 | 1 |
| GO:0044309 | neuron spine                                         | 0.563590868 | 0.502910366 | 1 |
| GO:0030662 | coated vesicle membrane                              | 0.575742865 | 0.510350765 | 1 |
| GO:0030426 | growth cone                                          | 0.577735402 | 0.510350765 | 1 |
| GO:0009897 | external side of plasma membrane                     | 0.580974744 | 0.510646222 | 1 |
| GO:0055037 | recycling endosome                                   | 0.589497738 | 0.514685795 | 1 |
| GO:0030427 | site of polarized growth                             | 0.591426371 | 0.514685795 | 1 |
| GO:0030136 | clathrin-coated vesicle                              | 0.597158665 | 0.515881161 | 1 |
| GO:0000775 | chromosome, centromeric region                       | 0.60093593  | 0.515881161 | 1 |
| GO:0045177 | apical part of cell                                  | 0.601603929 | 0.515881161 | 1 |
| GO:0031514 | motile cilium                                        | 0.606536243 | 0.517585859 | 1 |
| GO:0005882 | intermediate filament                                | 0.635117365 | 0.539357234 | 1 |
| GO:0098858 | actin-based cell projection                          | 0.643620454 | 0.543950485 | 1 |
| GO:0036464 | cytoplasmic ribonucleoprotein granule                | 0.664822204 | 0.559180599 | 1 |
| GO:0035770 | ribonucleoprotein granule                            | 0.680277935 | 0.569455715 | 1 |
| GO:0045111 | intermediate filament cytoskeleton                   | 0.69213321  | 0.576633804 | 1 |
| GO:0098798 | mitochondrial protein complex                        | 0.711842886 | 0.590257011 | 1 |
| GO:0005840 | ribosome                                             | 0.718575231 | 0.593042074 | 1 |

|            |                              |             |             |   |
|------------|------------------------------|-------------|-------------|---|
| GO:0030135 | coated vesicle               | 0.753499607 | 0.618959342 | 1 |
| GO:0005938 | cell cortex                  | 0.761538462 | 0.62068781  | 1 |
| GO:0030667 | secretory granule membrane   | 0.762665501 | 0.62068781  | 1 |
| GO:0030139 | endocytic vesicle            | 0.77040861  | 0.624100111 | 1 |
| GO:0031253 | cell projection membrane     | 0.801802754 | 0.646552679 | 1 |
| GO:0031252 | cell leading edge            | 0.862584809 | 0.692389633 | 1 |
| GO:0005874 | microtubule                  | 0.868982236 | 0.694354227 | 1 |
| GO:0005743 | mitochondrial inner membrane | 0.900681688 | 0.716426968 | 1 |

**Table S3.** Results of MF GO terms enrichment of *Scutellaria baicalensis* in breast cancer.

| ID             | Description                                                                  | pvalue          | qvalue          | Count |
|----------------|------------------------------------------------------------------------------|-----------------|-----------------|-------|
| GO:000<br>8227 | G protein-coupled amine receptor activity                                    | 1.4282E<br>-10  | 3.35252<br>E-08 | 11    |
| GO:000<br>1223 | transcription coactivator binding                                            | 5.45016<br>E-09 | 3.81772<br>E-07 | 11    |
| GO:000<br>4879 | nuclear receptor activity                                                    | 6.50553<br>E-09 | 3.81772<br>E-07 | 10    |
| GO:009<br>8531 | ligand-activated transcription factor activity                               | 6.50553<br>E-09 | 3.81772<br>E-07 | 10    |
| GO:009<br>9528 | G protein-coupled neurotransmitter receptor activity                         | 1.16114<br>E-07 | 5.45124<br>E-06 | 10    |
| GO:000<br>3707 | steroid hormone receptor activity                                            | 1.62524<br>E-07 | 6.34906<br>E-06 | 9     |
| GO:000<br>1221 | transcription cofactor binding                                               | 1.89333<br>E-07 | 6.34906<br>E-06 | 8     |
| GO:002<br>0037 | heme binding                                                                 | 4.19123<br>E-07 | 1.2023E<br>-05  | 8     |
| GO:004<br>4389 | ubiquitin-like protein ligase binding                                        | 4.6097E<br>-07  | 1.2023E<br>-05  | 8     |
| GO:004<br>6906 | tetrapyrrole binding                                                         | 7.14631<br>E-07 | 1.6775E<br>-05  | 8     |
| GO:006<br>1629 | RNA polymerase II-specific DNA-binding transcription factor binding          | 8.19321<br>E-07 | 1.74841<br>E-05 | 8     |
| GO:014<br>0297 | DNA-binding transcription factor binding                                     | 1.1571E<br>-06  | 2.26344<br>E-05 | 8     |
| GO:000<br>1091 | RNA polymerase II general transcription initiation factor binding            | 2.07114<br>E-06 | 3.59193<br>E-05 | 7     |
| GO:003<br>1625 | ubiquitin protein ligase binding                                             | 2.14227<br>E-06 | 3.59193<br>E-05 | 7     |
| GO:004<br>6982 | protein heterodimerization activity                                          | 4.27855<br>E-06 | 6.69556<br>E-05 | 7     |
| GO:000<br>2020 | protease binding                                                             | 5.31956<br>E-06 | 7.80436<br>E-05 | 7     |
| GO:000<br>8144 | drug binding                                                                 | 1.29264<br>E-05 | 0.00017<br>8124 | 7     |
| GO:009<br>7199 | cysteine-type endopeptidase activity involved in apoptotic signaling pathway | 1.38015<br>E-05 | 0.00017<br>8124 | 7     |
| GO:000<br>5496 | steroid binding                                                              | 1.44177<br>E-05 | 0.00017<br>8124 | 7     |
| GO:005<br>1721 | protein phosphatase 2A binding                                               | 1.82911<br>E-05 | 0.00019<br>2984 | 7     |
| GO:001         | sodium:chloride symporter activity                                           | 1.8909E         | 0.00019         | 6     |

|                |                                                                                                       |                 |                 |   |
|----------------|-------------------------------------------------------------------------------------------------------|-----------------|-----------------|---|
| 5378           |                                                                                                       | -05             | 2984            |   |
| GO:005<br>1400 | BH domain binding                                                                                     | 1.8909E<br>-05  | 0.00019<br>2984 | 6 |
| GO:007<br>0513 | death domain binding                                                                                  | 1.8909E<br>-05  | 0.00019<br>2984 | 6 |
| GO:001<br>5373 | anion:sodium symporter activity                                                                       | 4.12666<br>E-05 | 0.00038<br>7472 | 6 |
| GO:190<br>1338 | catecholamine binding                                                                                 | 4.12666<br>E-05 | 0.00038<br>7472 | 6 |
| GO:001<br>7171 | serine hydrolase activity                                                                             | 4.58734<br>E-05 | 0.00041<br>416  | 6 |
| GO:009<br>7153 | cysteine-type endopeptidase activity involved in apoptotic process                                    | 5.13981<br>E-05 | 0.00044<br>6853 | 6 |
| GO:005<br>1879 | Hsp90 protein binding                                                                                 | 5.48182<br>E-05 | 0.00045<br>9566 | 6 |
| GO:000<br>5126 | cytokine receptor binding                                                                             | 6.01205<br>E-05 | 0.00048<br>6638 | 6 |
| GO:014<br>0296 | general transcription initiation factor binding                                                       | 6.59834<br>E-05 | 0.00051<br>6291 | 6 |
| GO:001<br>5377 | cation:chloride symporter activity                                                                    | 7.62645<br>E-05 | 0.00055<br>9441 | 6 |
| GO:003<br>5173 | histone kinase activity                                                                               | 7.62645<br>E-05 | 0.00055<br>9441 | 6 |
| GO:003<br>2813 | tumor necrosis factor receptor superfamily binding                                                    | 9.31579<br>E-05 | 0.00066<br>2654 | 6 |
| GO:000<br>5326 | neurotransmitter transmembrane transporter activity                                                   | 0.00010<br>7899 | 0.00073<br>3913 | 6 |
| GO:001<br>6538 | cyclin-dependent protein serine/threonine kinase regulator activity                                   | 0.00010<br>9429 | 0.00073<br>3913 | 6 |
| GO:000<br>5123 | death receptor binding                                                                                | 0.00012<br>6485 | 0.00082<br>4739 | 5 |
| GO:001<br>6705 | oxidoreductase activity, acting on paired donors, with incorporation or reduction of molecular oxygen | 0.00015<br>4792 | 0.00098<br>2039 | 5 |
| GO:001<br>5296 | anion:cation symporter activity                                                                       | 0.00016<br>9643 | 0.00100<br>12   | 5 |
| GO:001<br>5464 | acetylcholine receptor activity                                                                       | 0.00016<br>9643 | 0.00100<br>12   | 5 |
| GO:000<br>1085 | RNA polymerase II transcription factor binding                                                        | 0.00017<br>0608 | 0.00100<br>12   | 5 |
| GO:004<br>7485 | protein N-terminus binding                                                                            | 0.00019<br>1556 | 0.00108<br>8927 | 5 |
| GO:000<br>4252 | serine-type endopeptidase activity                                                                    | 0.00019<br>4835 | 0.00108<br>8927 | 5 |

|                |                                                         |                 |                 |   |
|----------------|---------------------------------------------------------|-----------------|-----------------|---|
| GO:003<br>0594 | neurotransmitter receptor activity                      | 0.00022<br>7377 | 0.00124<br>1251 | 5 |
| GO:009<br>8960 | postsynaptic neurotransmitter receptor activity         | 0.00030<br>3982 | 0.00162<br>1723 | 5 |
| GO:001<br>9887 | protein kinase regulator activity                       | 0.00031<br>7199 | 0.00164<br>3029 | 5 |
| GO:000<br>2039 | p53 binding                                             | 0.00032<br>2375 | 0.00164<br>3029 | 4 |
| GO:000<br>4175 | endopeptidase activity                                  | 0.00033<br>2633 | 0.00164<br>3029 | 4 |
| GO:000<br>8236 | serine-type peptidase activity                          | 0.00033<br>5974 | 0.00164<br>3029 | 4 |
| GO:003<br>1072 | heat shock protein binding                              | 0.00042<br>3871 | 0.00203<br>0577 | 4 |
| GO:000<br>1098 | basal transcription machinery binding                   | 0.00044<br>9878 | 0.00207<br>0644 | 4 |
| GO:000<br>1099 | basal RNA polymerase II transcription machinery binding | 0.00044<br>9878 | 0.00207<br>0644 | 4 |
| GO:000<br>5164 | tumor necrosis factor receptor binding                  | 0.00047<br>9429 | 0.00212<br>3389 | 4 |
| GO:003<br>0291 | protein serine/threonine kinase inhibitor activity      | 0.00047<br>9429 | 0.00212<br>3389 | 4 |
| GO:000<br>4993 | G protein-coupled serotonin receptor activity           | 0.00063<br>142  | 0.00269<br>4865 | 4 |
| GO:009<br>9589 | serotonin receptor activity                             | 0.00063<br>142  | 0.00269<br>4865 | 4 |
| GO:001<br>9207 | kinase regulator activity                               | 0.00071<br>9535 | 0.00301<br>6096 | 4 |
| GO:003<br>5257 | nuclear hormone receptor binding                        | 0.00075<br>0819 | 0.00309<br>2016 | 4 |
| GO:001<br>9903 | protein phosphatase binding                             | 0.00087<br>5542 | 0.00354<br>3482 | 4 |
| GO:000<br>8081 | phosphoric diester hydrolase activity                   | 0.00100<br>1481 | 0.00398<br>4482 | 4 |
| GO:000<br>1094 | TFIID-class transcription factor complex binding        | 0.00106<br>6388 | 0.00403<br>743  | 4 |
| GO:001<br>6725 | oxidoreductase activity, acting on CH or CH2 groups     | 0.00106<br>6388 | 0.00403<br>743  | 4 |
| GO:001<br>6803 | ether hydrolase activity                                | 0.00106<br>6388 | 0.00403<br>743  | 4 |
| GO:005<br>1213 | dioxygenase activity                                    | 0.00108<br>8032 | 0.00405<br>3988 | 4 |
| GO:000<br>5125 | cytokine activity                                       | 0.00111<br>3529 | 0.00408<br>4161 | 4 |

|                |                                                                                          |                 |                 |   |
|----------------|------------------------------------------------------------------------------------------|-----------------|-----------------|---|
| GO:001<br>6801 | hydrolase activity, acting on ether bonds                                                | 0.00129<br>9162 | 0.00469<br>1709 | 4 |
| GO:000<br>1046 | core promoter sequence-specific DNA binding                                              | 0.00153<br>4468 | 0.00528<br>6579 | 4 |
| GO:000<br>4861 | cyclin-dependent protein serine/threonine kinase inhibitor activity                      | 0.00155<br>397  | 0.00528<br>6579 | 4 |
| GO:004<br>3176 | amine binding                                                                            | 0.00155<br>397  | 0.00528<br>6579 | 4 |
| GO:005<br>1378 | serotonin binding                                                                        | 0.00155<br>397  | 0.00528<br>6579 | 4 |
| GO:001<br>6922 | nuclear receptor binding                                                                 | 0.00160<br>0829 | 0.00536<br>8195 | 3 |
| GO:190<br>1618 | organic hydroxy compound transmembrane transporter activity                              | 0.00173<br>5919 | 0.00572<br>9435 | 3 |
| GO:005<br>1087 | chaperone binding                                                                        | 0.00178<br>2633 | 0.00572<br>9435 | 3 |
| GO:000<br>1162 | RNA polymerase II intronic transcription regulatory region sequence-specific DNA binding | 0.00183<br>0593 | 0.00572<br>9435 | 3 |
| GO:003<br>4236 | protein kinase A catalytic subunit binding                                               | 0.00183<br>0593 | 0.00572<br>9435 | 3 |
| GO:004<br>2166 | acetylcholine binding                                                                    | 0.00183<br>0593 | 0.00572<br>9435 | 3 |
| GO:005<br>1427 | hormone receptor binding                                                                 | 0.00187<br>8782 | 0.00580<br>2885 | 3 |
| GO:005<br>0998 | nitric-oxide synthase binding                                                            | 0.00212<br>8814 | 0.00648<br>9755 | 3 |
| GO:000<br>4601 | peroxidase activity                                                                      | 0.00218<br>663  | 0.00658<br>0546 | 3 |
| GO:005<br>0661 | NADP binding                                                                             | 0.00243<br>6724 | 0.00724<br>0366 | 3 |
| GO:004<br>2826 | histone deacetylase binding                                                              | 0.00257<br>185  | 0.00746<br>1089 | 3 |
| GO:001<br>5267 | channel activity                                                                         | 0.00260<br>0455 | 0.00746<br>1089 | 3 |
| GO:002<br>2803 | passive transmembrane transporter activity                                               | 0.00263<br>3959 | 0.00746<br>1089 | 3 |
| GO:001<br>6684 | oxidoreductase activity, acting on peroxide as acceptor                                  | 0.00270<br>3839 | 0.00746<br>1089 | 3 |
| GO:000<br>1161 | intronic transcription regulatory region sequence-specific DNA binding                   | 0.00278<br>9186 | 0.00746<br>1089 | 3 |
| GO:000<br>4697 | protein kinase C activity                                                                | 0.00278<br>9186 | 0.00746<br>1089 | 3 |
| GO:000<br>4698 | calcium-dependent protein kinase C activity                                              | 0.00278<br>9186 | 0.00746<br>1089 | 3 |

|                |                                                                                                                               |                 |                 |   |
|----------------|-------------------------------------------------------------------------------------------------------------------------------|-----------------|-----------------|---|
| GO:001<br>6641 | oxidoreductase activity, acting on the CH-NH2 group of donors, oxygen as acceptor                                             | 0.00278<br>9186 | 0.00746<br>1089 | 3 |
| GO:001<br>9902 | phosphatase binding                                                                                                           | 0.00279<br>7072 | 0.00746<br>1089 | 3 |
| GO:003<br>3218 | amide binding                                                                                                                 | 0.00285<br>7665 | 0.00753<br>707  | 3 |
| GO:009<br>7110 | scaffold protein binding                                                                                                      | 0.00329<br>0617 | 0.00858<br>2546 | 3 |
| GO:000<br>4860 | protein kinase inhibitor activity                                                                                             | 0.00412<br>6195 | 0.01064<br>3625 | 3 |
| GO:001<br>6638 | oxidoreductase activity, acting on the CH-NH2 group of donors                                                                 | 0.00435<br>9691 | 0.01100<br>4088 | 3 |
| GO:003<br>1690 | adrenergic receptor binding                                                                                                   | 0.00435<br>9691 | 0.01100<br>4088 | 3 |
| GO:004<br>2165 | neurotransmitter binding                                                                                                      | 0.00480<br>3129 | 0.01199<br>4376 | 3 |
| GO:001<br>9210 | kinase inhibitor activity                                                                                                     | 0.00487<br>9444 | 0.01205<br>6688 | 3 |
| GO:000<br>5518 | collagen binding                                                                                                              | 0.00507<br>9838 | 0.01242<br>1096 | 3 |
| GO:004<br>6873 | metal ion transmembrane transporter activity                                                                                  | 0.00538<br>6065 | 0.01303<br>4102 | 3 |
| GO:001<br>5370 | solute:sodium symporter activity                                                                                              | 0.00549<br>5362 | 0.01316<br>2896 | 3 |
| GO:000<br>5178 | integrin binding                                                                                                              | 0.00573<br>3607 | 0.01323<br>164  | 3 |
| GO:000<br>4114 | 3',5'-cyclic-nucleotide phosphodiesterase activity                                                                            | 0.00574<br>9533 | 0.01323<br>164  | 3 |
| GO:000<br>9931 | calcium-dependent protein serine/threonine kinase activity                                                                    | 0.00574<br>9533 | 0.01323<br>164  | 3 |
| GO:007<br>0412 | R-SMAD binding                                                                                                                | 0.00574<br>9533 | 0.01323<br>164  | 3 |
| GO:000<br>0979 | RNA polymerase II core promoter sequence-specific DNA binding                                                                 | 0.00625<br>2094 | 0.01411<br>1508 | 3 |
| GO:001<br>0857 | calcium-dependent protein kinase activity                                                                                     | 0.00625<br>2094 | 0.01411<br>1508 | 3 |
| GO:000<br>5261 | cation channel activity                                                                                                       | 0.00634<br>2654 | 0.01417<br>9567 | 3 |
| GO:000<br>5506 | iron ion binding                                                                                                              | 0.00676<br>6927 | 0.01458<br>8053 | 3 |
| GO:000<br>4112 | cyclic-nucleotide phosphodiesterase activity                                                                                  | 0.00677<br>3959 | 0.01458<br>8053 | 3 |
| GO:001<br>6702 | oxidoreductase activity, acting on single donors with incorporation of molecular oxygen, incorporation of two atoms of oxygen | 0.00677<br>3959 | 0.01458<br>8053 | 3 |



|                |                                                                                                                                                                                             |                 |                 |   |
|----------------|---------------------------------------------------------------------------------------------------------------------------------------------------------------------------------------------|-----------------|-----------------|---|
| GO:007<br>0330 | aromatase activity                                                                                                                                                                          | 0.00677<br>3959 | 0.01458<br>8053 | 3 |
| GO:001<br>5081 | sodium ion transmembrane transporter activity                                                                                                                                               | 0.00692<br>394  | 0.01477<br>5489 | 3 |
| GO:000<br>4435 | phosphatidylinositol phospholipase C activity                                                                                                                                               | 0.00731<br>4928 | 0.01515<br>176  | 3 |
| GO:001<br>6701 | oxidoreductase activity, acting on single donors with incorporation of molecular oxygen                                                                                                     | 0.00731<br>4928 | 0.01515<br>176  | 3 |
| GO:001<br>7025 | TBP-class protein binding                                                                                                                                                                   | 0.00731<br>4928 | 0.01515<br>176  | 3 |
| GO:003<br>3613 | activating transcription factor binding                                                                                                                                                     | 0.00735<br>8456 | 0.01515<br>176  | 3 |
| GO:005<br>0660 | flavin adenine dinucleotide binding                                                                                                                                                         | 0.00761<br>4424 | 0.01554<br>2486 | 3 |
| GO:003<br>0295 | protein kinase activator activity                                                                                                                                                           | 0.00787<br>5609 | 0.01593<br>7031 | 3 |
| GO:000<br>4629 | phospholipase C activity                                                                                                                                                                    | 0.00845<br>339  | 0.01681<br>6289 | 3 |
| GO:003<br>5035 | histone acetyltransferase binding                                                                                                                                                           | 0.00845<br>339  | 0.01681<br>6289 | 3 |
| GO:000<br>8013 | beta-catenin binding                                                                                                                                                                        | 0.00869<br>0696 | 0.01714<br>308  | 3 |
| GO:001<br>6209 | antioxidant activity                                                                                                                                                                        | 0.00897<br>2977 | 0.01755<br>2403 | 3 |
| GO:005<br>1117 | ATPase binding                                                                                                                                                                              | 0.00955<br>3547 | 0.01853<br>3631 | 3 |
| GO:001<br>9209 | kinase activator activity                                                                                                                                                                   | 0.00985<br>1875 | 0.01895<br>5721 | 3 |
| GO:004<br>2578 | phosphoric ester hydrolase activity                                                                                                                                                         | 0.01010<br>156  | 0.01927<br>8117 | 3 |
| GO:005<br>1059 | NF-kappaB binding                                                                                                                                                                           | 0.01029<br>9463 | 0.01949<br>7285 | 3 |
| GO:004<br>8018 | receptor ligand activity                                                                                                                                                                    | 0.01059<br>2597 | 0.01989<br>1782 | 3 |
| GO:003<br>0546 | signaling receptor activator activity                                                                                                                                                       | 0.01115<br>9932 | 0.02079<br>085  | 3 |
| GO:005<br>1019 | mitogen-activated protein kinase binding                                                                                                                                                    | 0.01162<br>0189 | 0.02144<br>7154 | 3 |
| GO:001<br>5077 | monovalent inorganic cation transmembrane transporter activity                                                                                                                              | 0.01169<br>495  | 0.02144<br>7154 | 2 |
| GO:001<br>5294 | solute:cation symporter activity                                                                                                                                                            | 0.01278<br>1317 | 0.02325<br>7721 | 2 |
| GO:001<br>6712 | oxidoreductase activity, acting on paired donors, with incorporation or reduction of molecular oxygen, reduced flavin or flavoprotein as one donor, and incorporation of one atom of oxygen | 0.01301<br>1159 | 0.02349<br>3833 | 2 |

|                |                                                                                                                                                                      |                 |                 |   |
|----------------|----------------------------------------------------------------------------------------------------------------------------------------------------------------------|-----------------|-----------------|---|
| GO:009<br>7718 | disordered domain specific binding                                                                                                                                   | 0.01373<br>252  | 0.02460<br>7086 | 2 |
| GO:000<br>4497 | monooxygenase activity                                                                                                                                               | 0.01385<br>6787 | 0.02464<br>1654 | 2 |
| GO:001<br>5108 | chloride transmembrane transporter activity                                                                                                                          | 0.01422<br>6388 | 0.02510<br>8703 | 2 |
| GO:000<br>8395 | steroid hydroxylase activity                                                                                                                                         | 0.01522<br>6074 | 0.02647<br>4967 | 2 |
| GO:004<br>3539 | protein serine/threonine kinase activator activity                                                                                                                   | 0.01522<br>6074 | 0.02647<br>4967 | 2 |
| GO:000<br>5244 | voltage-gated ion channel activity                                                                                                                                   | 0.01667<br>837  | 0.02857<br>6845 | 2 |
| GO:002<br>2832 | voltage-gated channel activity                                                                                                                                       | 0.01667<br>837  | 0.02857<br>6845 | 2 |
| GO:000<br>5516 | calmodulin binding                                                                                                                                                   | 0.01753<br>0026 | 0.02981<br>8428 | 2 |
| GO:000<br>9055 | electron transfer activity                                                                                                                                           | 0.01780<br>4729 | 0.03006<br>7811 | 2 |
| GO:003<br>0331 | estrogen receptor binding                                                                                                                                            | 0.01841<br>145  | 0.03087<br>0325 | 2 |
| GO:004<br>2277 | peptide binding                                                                                                                                                      | 0.01857<br>3441 | 0.03092<br>1069 | 2 |
| GO:000<br>4197 | cysteine-type endopeptidase activity                                                                                                                                 | 0.01909<br>8862 | 0.03157<br>1877 | 2 |
| GO:000<br>5245 | voltage-gated calcium channel activity                                                                                                                               | 0.02010<br>0426 | 0.03299<br>5179 | 2 |
| GO:000<br>5216 | ion channel activity                                                                                                                                                 | 0.02026<br>4799 | 0.03303<br>3992 | 2 |
| GO:000<br>4712 | protein serine/threonine/tyrosine kinase activity                                                                                                                    | 0.02096<br>8375 | 0.03345<br>97   | 2 |
| GO:001<br>6709 | oxidoreductase activity, acting on paired donors, with incorporation or reduction of molecular oxygen, NAD(P)H as one donor, and incorporation of one atom of oxygen | 0.02096<br>8375 | 0.03345<br>97   | 2 |
| GO:004<br>8156 | tau protein binding                                                                                                                                                  | 0.02096<br>8375 | 0.03345<br>97   | 2 |
| GO:000<br>4674 | protein serine/threonine kinase activity                                                                                                                             | 0.02109<br>6116 | 0.03345<br>97   | 2 |
| GO:000<br>1102 | RNA polymerase II activating transcription factor binding                                                                                                            | 0.02275<br>0334 | 0.03584<br>1219 | 2 |
| GO:000<br>8009 | chemokine activity                                                                                                                                                   | 0.02459<br>2577 | 0.03848<br>5226 | 2 |
| GO:007<br>0888 | E-box binding                                                                                                                                                        | 0.02553<br>5886 | 0.03943<br>5614 | 2 |
| GO:009<br>9529 | neurotransmitter receptor activity involved in regulation of postsynaptic membrane potential                                                                         | 0.02553<br>5886 | 0.03943<br>5614 | 2 |

|                |                                                     |                 |                 |   |
|----------------|-----------------------------------------------------|-----------------|-----------------|---|
| GO:002<br>2836 | gated channel activity                              | 0.02615<br>4389 | 0.04012<br>6789 | 2 |
| GO:005<br>1018 | protein kinase A binding                            | 0.02649<br>3766 | 0.04038<br>3525 | 2 |
| GO:003<br>0374 | nuclear receptor transcription coactivator activity | 0.02945<br>3189 | 0.04460<br>483  | 2 |
| GO:000<br>8234 | cysteine-type peptidase activity                    | 0.03186<br>5404 | 0.04794<br>8617 | 2 |
| GO:002<br>2843 | voltage-gated cation channel activity               | 0.03244<br>9462 | 0.04803<br>6764 | 2 |
| GO:004<br>3621 | protein self-association                            | 0.03253<br>7907 | 0.04803<br>6764 | 2 |
| GO:005<br>0840 | extracellular matrix binding                        | 0.03253<br>7907 | 0.04803<br>6764 | 2 |
| GO:001<br>5293 | symporter activity                                  | 0.03423<br>5214 | 0.05022<br>6663 | 2 |
| GO:001<br>9842 | vitamin binding                                     | 0.03484<br>1632 | 0.05079<br>8848 | 2 |
| GO:001<br>5103 | inorganic anion transmembrane transporter activity  | 0.03545<br>3618 | 0.05137<br>2039 | 2 |
| GO:000<br>8083 | growth factor activity                              | 0.04669<br>9463 | 0.06725<br>2051 | 2 |
| GO:004<br>2379 | chemokine receptor binding                          | 0.04725<br>0621 | 0.06737<br>3043 | 2 |
| GO:000<br>2162 | dystroglycan binding                                | 0.04850<br>5569 | 0.06737<br>3043 | 2 |
| GO:000<br>4955 | prostaglandin receptor activity                     | 0.04850<br>5569 | 0.06737<br>3043 | 2 |
| GO:000<br>8603 | cAMP-dependent protein kinase regulator activity    | 0.04850<br>5569 | 0.06737<br>3043 | 2 |
| GO:001<br>8455 | alcohol dehydrogenase [NAD(P)+] activity            | 0.04850<br>5569 | 0.06737<br>3043 | 2 |
| GO:004<br>3560 | insulin receptor substrate binding                  | 0.04850<br>5569 | 0.06737<br>3043 | 2 |
| GO:000<br>8201 | heparin binding                                     | 0.05178<br>3854 | 0.07139<br>5157 | 2 |
| GO:007<br>0491 | repressing transcription factor binding             | 0.05218<br>385  | 0.07139<br>5157 | 2 |
| GO:000<br>4312 | fatty acid synthase activity                        | 0.05322<br>621  | 0.07139<br>5157 | 2 |
| GO:000<br>4954 | prostanoid receptor activity                        | 0.05322<br>621  | 0.07139<br>5157 | 2 |
| GO:000<br>5527 | macrolide binding                                   | 0.05322<br>621  | 0.07139<br>5157 | 2 |

|                |                                                                                                                      |                 |                 |   |
|----------------|----------------------------------------------------------------------------------------------------------------------|-----------------|-----------------|---|
| GO:003<br>1996 | thioesterase binding                                                                                                 | 0.05322<br>621  | 0.07139<br>5157 | 2 |
| GO:000<br>1540 | amyloid-beta binding                                                                                                 | 0.05599<br>928  | 0.07310<br>12   | 2 |
| GO:000<br>1664 | G protein-coupled receptor binding                                                                                   | 0.05791<br>6639 | 0.07310<br>12   | 2 |
| GO:000<br>3964 | RNA-directed DNA polymerase activity                                                                                 | 0.05792<br>3687 | 0.07310<br>12   | 2 |
| GO:000<br>4115 | 3',5'-cyclic-AMP phosphodiesterase activity                                                                          | 0.05792<br>3687 | 0.07310<br>12   | 2 |
| GO:001<br>6004 | phospholipase activator activity                                                                                     | 0.05792<br>3687 | 0.07310<br>12   | 2 |
| GO:003<br>1543 | peptidyl-proline dioxygenase activity                                                                                | 0.05792<br>3687 | 0.07310<br>12   | 2 |
| GO:003<br>4452 | dynactin binding                                                                                                     | 0.05792<br>3687 | 0.07310<br>12   | 2 |
| GO:004<br>2301 | phosphate ion binding                                                                                                | 0.05792<br>3687 | 0.07310<br>12   | 2 |
| GO:004<br>3023 | ribosomal large subunit binding                                                                                      | 0.05792<br>3687 | 0.07310<br>12   | 2 |
| GO:004<br>7555 | 3',5'-cyclic-GMP phosphodiesterase activity                                                                          | 0.05792<br>3687 | 0.07310<br>12   | 2 |
| GO:190<br>2282 | voltage-gated potassium channel activity involved in ventricular cardiac muscle cell action potential repolarization | 0.05792<br>3687 | 0.07310<br>12   | 2 |
| GO:004<br>6332 | SMAD binding                                                                                                         | 0.05859<br>5863 | 0.07355<br>4053 | 2 |
| GO:003<br>5258 | steroid hormone receptor binding                                                                                     | 0.06123<br>3572 | 0.07645<br>6252 | 2 |
| GO:000<br>8179 | adenylate cyclase binding                                                                                            | 0.06259<br>8111 | 0.07653<br>1682 | 2 |
| GO:001<br>6175 | superoxide-generating NAD(P)H oxidase activity                                                                       | 0.06259<br>8111 | 0.07653<br>1682 | 2 |
| GO:001<br>6653 | oxidoreductase activity, acting on NAD(P)H, heme protein as acceptor                                                 | 0.06259<br>8111 | 0.07653<br>1682 | 2 |
| GO:003<br>1005 | filamin binding                                                                                                      | 0.06259<br>8111 | 0.07653<br>1682 | 2 |
| GO:000<br>5172 | vascular endothelial growth factor receptor binding                                                                  | 0.06724<br>9595 | 0.08054<br>06   | 2 |
| GO:003<br>2794 | GTPase activating protein binding                                                                                    | 0.06724<br>9595 | 0.08054<br>06   | 2 |
| GO:003<br>5497 | cAMP response element binding                                                                                        | 0.06724<br>9595 | 0.08054<br>06   | 2 |
| GO:006<br>0229 | lipase activator activity                                                                                            | 0.06724<br>9595 | 0.08054<br>06   | 2 |

|                |                                                                                                          |                 |                 |   |
|----------------|----------------------------------------------------------------------------------------------------------|-----------------|-----------------|---|
| GO:000<br>8237 | metallopeptidase activity                                                                                | 0.06770<br>907  | 0.08067<br>9256 | 2 |
| GO:000<br>4953 | icosanoid receptor activity                                                                              | 0.07187<br>8251 | 0.08352<br>7097 | 2 |
| GO:000<br>5161 | platelet-derived growth factor receptor binding                                                          | 0.07187<br>8251 | 0.08352<br>7097 | 2 |
| GO:003<br>0553 | cGMP binding                                                                                             | 0.07187<br>8251 | 0.08352<br>7097 | 2 |
| GO:004<br>2809 | vitamin D receptor binding                                                                               | 0.07187<br>8251 | 0.08352<br>7097 | 2 |
| GO:008<br>6008 | voltage-gated potassium channel activity involved in cardiac muscle cell action potential repolarization | 0.07187<br>8251 | 0.08352<br>7097 | 2 |
| GO:000<br>5159 | insulin-like growth factor receptor binding                                                              | 0.07648<br>4189 | 0.08673<br>2642 | 2 |
| GO:000<br>8392 | arachidonic acid epoxygenase activity                                                                    | 0.07648<br>4189 | 0.08673<br>2642 | 2 |
| GO:001<br>0181 | FMN binding                                                                                              | 0.07648<br>4189 | 0.08673<br>2642 | 2 |
| GO:007<br>0402 | NADPH binding                                                                                            | 0.07648<br>4189 | 0.08673<br>2642 | 2 |
| GO:007<br>1837 | HMG box domain binding                                                                                   | 0.07648<br>4189 | 0.08673<br>2642 | 2 |
| GO:000<br>4708 | MAP kinase kinase activity                                                                               | 0.08562<br>8351 | 0.09526<br>1273 | 2 |
| GO:004<br>5236 | CXCR chemokine receptor binding                                                                          | 0.08562<br>8351 | 0.09526<br>1273 | 2 |
| GO:004<br>6965 | retinoid X receptor binding                                                                              | 0.08562<br>8351 | 0.09526<br>1273 | 2 |
| GO:007<br>0064 | proline-rich region binding                                                                              | 0.08562<br>8351 | 0.09526<br>1273 | 2 |
| GO:003<br>1406 | carboxylic acid binding                                                                                  | 0.08843<br>0236 | 0.09791<br>4313 | 2 |
| GO:001<br>6722 | oxidoreductase activity, oxidizing metal ions                                                            | 0.09016<br>6794 | 0.09890<br>4059 | 1 |
| GO:005<br>0664 | oxidoreductase activity, acting on NAD(P)H, oxygen as acceptor                                           | 0.09016<br>6794 | 0.09890<br>4059 | 1 |
| GO:000<br>1972 | retinoic acid binding                                                                                    | 0.09468<br>2957 | 0.09966<br>6271 | 1 |
| GO:000<br>4707 | MAP kinase activity                                                                                      | 0.09468<br>2957 | 0.09966<br>6271 | 1 |
| GO:000<br>4745 | retinol dehydrogenase activity                                                                           | 0.09468<br>2957 | 0.09966<br>6271 | 1 |
| GO:000<br>8320 | protein transmembrane transporter activity                                                               | 0.09468<br>2957 | 0.09966<br>6271 | 1 |

|                |                                                  |                 |                 |   |
|----------------|--------------------------------------------------|-----------------|-----------------|---|
| GO:000<br>8391 | arachidonic acid monooxygenase activity          | 0.09468<br>2957 | 0.09966<br>6271 | 1 |
| GO:003<br>0506 | ankyrin binding                                  | 0.09468<br>2957 | 0.09966<br>6271 | 1 |
| GO:003<br>1418 | L-ascorbic acid binding                          | 0.09468<br>2957 | 0.09966<br>6271 | 1 |
| GO:003<br>1681 | G-protein beta-subunit binding                   | 0.09468<br>2957 | 0.09966<br>6271 | 1 |
| GO:014<br>0318 | protein transporter activity                     | 0.09468<br>2957 | 0.09966<br>6271 | 1 |
| GO:000<br>4620 | phospholipase activity                           | 0.09572<br>8593 | 0.09987<br>1233 | 1 |
| GO:001<br>6407 | acetyltransferase activity                       | 0.09572<br>8593 | 0.09987<br>1233 | 1 |
| GO:003<br>1490 | chromatin DNA binding                            | 0.09726<br>6438 | 0.10102<br>6622 | 1 |
| GO:004<br>3177 | organic acid binding                             | 0.10018<br>2299 | 0.10287<br>7514 | 1 |
| GO:000<br>4222 | metalloendopeptidase activity                    | 0.10036<br>3243 | 0.10287<br>7514 | 1 |
| GO:009<br>9094 | ligand-gated cation channel activity             | 0.10036<br>3243 | 0.10287<br>7514 | 1 |
| GO:001<br>6651 | oxidoreductase activity, acting on NAD(P)H       | 0.10192<br>1991 | 0.10397<br>5256 | 1 |
| GO:000<br>5242 | inward rectifier potassium channel activity      | 0.10364<br>8876 | 0.10397<br>5256 | 1 |
| GO:002<br>2884 | macromolecule transmembrane transporter activity | 0.10364<br>8876 | 0.10397<br>5256 | 1 |
| GO:005<br>0321 | tau-protein kinase activity                      | 0.10364<br>8876 | 0.10397<br>5256 | 1 |
| GO:007<br>0034 | telomerase RNA binding                           | 0.10364<br>8876 | 0.10397<br>5256 | 1 |
| GO:002<br>2853 | active ion transmembrane transporter activity    | 0.10525<br>6483 | 0.10513<br>8615 | 1 |
| GO:000<br>5158 | insulin receptor binding                         | 0.10809<br>8846 | 0.10597<br>3127 | 1 |
| GO:000<br>5248 | voltage-gated sodium channel activity            | 0.10809<br>8846 | 0.10597<br>3127 | 1 |
| GO:001<br>7134 | fibroblast growth factor binding                 | 0.10809<br>8846 | 0.10597<br>3127 | 1 |
| GO:003<br>0552 | cAMP binding                                     | 0.10809<br>8846 | 0.10597<br>3127 | 1 |
| GO:000<br>5539 | glycosaminoglycan binding                        | 0.10834<br>9206 | 0.10597<br>3127 | 1 |

|                |                                                                                       |                 |                 |   |
|----------------|---------------------------------------------------------------------------------------|-----------------|-----------------|---|
| GO:001<br>5101 | organic cation transmembrane transporter activity                                     | 0.11252<br>6966 | 0.10870<br>1255 | 1 |
| GO:007<br>0006 | metalloaminopeptidase activity                                                        | 0.11252<br>6966 | 0.10870<br>1255 | 1 |
| GO:001<br>5291 | secondary active transmembrane transporter activity                                   | 0.11252<br>7734 | 0.10870<br>1255 | 1 |
| GO:000<br>5262 | calcium channel activity                                                              | 0.11624<br>2595 | 0.11157<br>9525 | 1 |
| GO:000<br>1671 | ATPase activator activity                                                             | 0.11693<br>3341 | 0.11157<br>9525 | 1 |
| GO:000<br>4190 | aspartic-type endopeptidase activity                                                  | 0.11693<br>3341 | 0.11157<br>9525 | 1 |
| GO:001<br>6616 | oxidoreductase activity, acting on the CH-OH group of donors, NAD or NADP as acceptor | 0.11949<br>1899 | 0.11211<br>7411 | 1 |
| GO:000<br>1965 | G-protein alpha-subunit binding                                                       | 0.12131<br>8078 | 0.11211<br>7411 | 1 |
| GO:000<br>8198 | ferrous iron binding                                                                  | 0.12131<br>8078 | 0.11211<br>7411 | 1 |
| GO:001<br>5252 | proton channel activity                                                               | 0.12131<br>8078 | 0.11211<br>7411 | 1 |
| GO:001<br>6628 | oxidoreductase activity, acting on the CH-CH group of donors, NAD or NADP as acceptor | 0.12131<br>8078 | 0.11211<br>7411 | 1 |
| GO:001<br>7075 | syntaxin-1 binding                                                                    | 0.12131<br>8078 | 0.11211<br>7411 | 1 |
| GO:004<br>2923 | neuropeptide binding                                                                  | 0.12131<br>8078 | 0.11211<br>7411 | 1 |
| GO:007<br>0001 | aspartic-type peptidase activity                                                      | 0.12131<br>8078 | 0.11211<br>7411 | 1 |
| GO:000<br>1968 | fibronectin binding                                                                   | 0.12568<br>128  | 0.11524<br>2293 | 1 |
| GO:004<br>2974 | retinoic acid receptor binding                                                        | 0.12568<br>128  | 0.11524<br>2293 | 1 |
| GO:004<br>3236 | laminin binding                                                                       | 0.13434<br>3503 | 0.12270<br>5718 | 1 |
| GO:001<br>6298 | lipase activity                                                                       | 0.13606<br>3462 | 0.12331<br>7017 | 1 |
| GO:001<br>6614 | oxidoreductase activity, acting on CH-OH group of donors                              | 0.13606<br>3462 | 0.12331<br>7017 | 1 |
| GO:003<br>0332 | cyclin binding                                                                        | 0.13864<br>273  | 0.12469<br>1788 | 1 |
| GO:004<br>3325 | phosphatidylinositol-3,4-bisphosphate binding                                         | 0.13864<br>273  | 0.12469<br>1788 | 1 |
| GO:190<br>1681 | sulfur compound binding                                                               | 0.14111<br>2039 | 0.12642<br>8223 | 1 |

|                |                                                |                 |                 |   |
|----------------|------------------------------------------------|-----------------|-----------------|---|
| GO:001<br>5085 | calcium ion transmembrane transporter activity | 0.14283<br>0226 | 0.12707<br>8736 | 1 |
| GO:190<br>4680 | peptide transmembrane transporter activity     | 0.14292<br>0839 | 0.12707<br>8736 | 1 |
| GO:000<br>4713 | protein tyrosine kinase activity               | 0.14453<br>3157 | 0.12802<br>7385 | 1 |
| GO:001<br>9838 | growth factor binding                          | 0.14624<br>0415 | 0.12843<br>1535 | 1 |
| GO:001<br>6417 | S-acyltransferase activity                     | 0.14717<br>7932 | 0.12843<br>1535 | 1 |
| GO:004<br>8019 | receptor antagonist activity                   | 0.14717<br>7932 | 0.12843<br>1535 | 1 |
| GO:007<br>1889 | 14-3-3 protein binding                         | 0.14717<br>7932 | 0.12843<br>1535 | 1 |
| GO:001<br>5276 | ligand-gated ion channel activity              | 0.15138<br>7316 | 0.13067<br>0847 | 1 |
| GO:002<br>2834 | ligand-gated channel activity                  | 0.15138<br>7316 | 0.13067<br>0847 | 1 |
| GO:000<br>5251 | delayed rectifier potassium channel activity   | 0.15141<br>4112 | 0.13067<br>0847 | 1 |
| GO:007<br>0851 | growth factor receptor binding                 | 0.15483<br>8707 | 0.13313<br>681  | 1 |
| GO:005<br>2689 | carboxylic ester hydrolase activity            | 0.15830<br>5445 | 0.13562<br>0877 | 1 |
| GO:000<br>5501 | retinoid binding                               | 0.16399<br>8182 | 0.13847<br>6314 | 1 |
| GO:003<br>4061 | DNA polymerase activity                        | 0.16399<br>8182 | 0.13847<br>6314 | 1 |
| GO:004<br>2805 | actinin binding                                | 0.16399<br>8182 | 0.13847<br>6314 | 1 |
| GO:004<br>3394 | proteoglycan binding                           | 0.16399<br>8182 | 0.13847<br>6314 | 1 |
| GO:001<br>6247 | channel regulator activity                     | 0.16703<br>5322 | 0.13947<br>4923 | 1 |
| GO:001<br>9840 | isoprenoid binding                             | 0.16815<br>1718 | 0.13947<br>4923 | 1 |
| GO:003<br>0551 | cyclic nucleotide binding                      | 0.16815<br>1718 | 0.13947<br>4923 | 1 |
| GO:004<br>2056 | chemoattractant activity                       | 0.16815<br>1718 | 0.13947<br>4923 | 1 |
| GO:004<br>8487 | beta-tubulin binding                           | 0.16815<br>1718 | 0.13947<br>4923 | 1 |
| GO:003<br>2451 | demethylase activity                           | 0.17228<br>4843 | 0.14190<br>0351 | 1 |



|                |                                                              |                 |                 |   |
|----------------|--------------------------------------------------------------|-----------------|-----------------|---|
| GO:004<br>3014 | alpha-tubulin binding                                        | 0.17228<br>4843 | 0.14190<br>0351 | 1 |
| GO:000<br>5547 | phosphatidylinositol-3,4,5-trisphosphate binding             | 0.17639<br>7657 | 0.14427<br>5363 | 1 |
| GO:001<br>6248 | channel inhibitor activity                                   | 0.17639<br>7657 | 0.14427<br>5363 | 1 |
| GO:001<br>6504 | peptidase activator activity                                 | 0.18049<br>0259 | 0.14660<br>1085 | 1 |
| GO:001<br>6790 | thiolester hydrolase activity                                | 0.18049<br>0259 | 0.14660<br>1085 | 1 |
| GO:003<br>0547 | receptor inhibitor activity                                  | 0.18456<br>2746 | 0.14887<br>8613 | 1 |
| GO:006<br>0590 | ATPase regulator activity                                    | 0.18456<br>2746 | 0.14887<br>8613 | 1 |
| GO:003<br>0544 | Hsp70 protein binding                                        | 0.18861<br>5217 | 0.15162<br>6508 | 1 |
| GO:007<br>2509 | divalent inorganic cation transmembrane transporter activity | 0.19188<br>8526 | 0.15373<br>1422 | 1 |
| GO:000<br>5272 | sodium channel activity                                      | 0.19666<br>0497 | 0.15701<br>8585 | 1 |
| GO:000<br>8188 | neuropeptide receptor activity                               | 0.20065<br>35   | 0.15966<br>3624 | 1 |
| GO:000<br>4177 | aminopeptidase activity                                      | 0.20462<br>6873 | 0.16118<br>6127 | 1 |
| GO:000<br>4715 | non-membrane spanning protein tyrosine kinase activity       | 0.20462<br>6873 | 0.16118<br>6127 | 1 |
| GO:001<br>6706 | 2-oxoglutarate-dependent dioxygenase activity                | 0.20462<br>6873 | 0.16118<br>6127 | 1 |
| GO:004<br>8020 | CCR chemokine receptor binding                               | 0.20858<br>071  | 0.16375<br>1095 | 1 |
| GO:001<br>5485 | cholesterol binding                                          | 0.21643<br>0161 | 0.16934<br>7108 | 1 |
| GO:000<br>3743 | translation initiation factor activity                       | 0.22420<br>2607 | 0.17426<br>6927 | 1 |
| GO:004<br>2887 | amide transmembrane transporter activity                     | 0.22420<br>2607 | 0.17426<br>6927 | 1 |
| GO:004<br>5296 | cadherin binding                                             | 0.22756<br>0059 | 0.17629<br>2837 | 1 |
| GO:001<br>5459 | potassium channel regulator activity                         | 0.23189<br>8794 | 0.17906<br>3127 | 1 |
| GO:000<br>4402 | histone acetyltransferase activity                           | 0.23951<br>9463 | 0.18254<br>5592 | 1 |
| GO:000<br>5080 | protein kinase C binding                                     | 0.23951<br>9463 | 0.18254<br>5592 | 1 |

|                |                                                              |                 |                 |   |
|----------------|--------------------------------------------------------------|-----------------|-----------------|---|
| GO:003<br>0170 | pyridoxal phosphate binding                                  | 0.23951<br>9463 | 0.18254<br>5592 | 1 |
| GO:007<br>0279 | vitamin B6 binding                                           | 0.23951<br>9463 | 0.18254<br>5592 | 1 |
| GO:000<br>8022 | protein C-terminus binding                                   | 0.24095<br>2947 | 0.18304<br>3799 | 1 |
| GO:002<br>2804 | active transmembrane transporter activity                    | 0.24334<br>0179 | 0.18426<br>0984 | 1 |
| GO:004<br>3022 | ribosome binding                                             | 0.24706<br>5347 | 0.18588<br>2498 | 1 |
| GO:006<br>1733 | peptide-lysine-N-acetyltransferase activity                  | 0.24706<br>5347 | 0.18588<br>2498 | 1 |
| GO:199<br>0841 | promoter-specific chromatin binding                          | 0.25081<br>0471 | 0.18809<br>731  | 1 |
| GO:001<br>6597 | amino acid binding                                           | 0.25453<br>7171 | 0.18848<br>3444 | 1 |
| GO:001<br>6627 | oxidoreductase activity, acting on the CH-CH group of donors | 0.25453<br>7171 | 0.18848<br>3444 | 1 |
| GO:001<br>6836 | hydro-lyase activity                                         | 0.25453<br>7171 | 0.18848<br>3444 | 1 |
| GO:003<br>2934 | sterol binding                                               | 0.25453<br>7171 | 0.18848<br>3444 | 1 |
| GO:000<br>5507 | copper ion binding                                           | 0.25824<br>5536 | 0.18943<br>6693 | 1 |
| GO:002<br>2824 | transmitter-gated ion channel activity                       | 0.25824<br>5536 | 0.18943<br>6693 | 1 |
| GO:002<br>2835 | transmitter-gated channel activity                           | 0.25824<br>5536 | 0.18943<br>6693 | 1 |
| GO:000<br>8509 | anion transmembrane transporter activity                     | 0.26063<br>4683 | 0.19059<br>3652 | 1 |
| GO:000<br>4714 | transmembrane receptor protein tyrosine kinase activity      | 0.26193<br>5655 | 0.19095<br>0151 | 1 |
| GO:000<br>8235 | metalloexopeptidase activity                                 | 0.27289<br>7423 | 0.19832<br>5323 | 1 |
| GO:003<br>4212 | peptide N-acetyltransferase activity                         | 0.27651<br>5442 | 0.20033<br>4449 | 1 |
| GO:004<br>8029 | monosaccharide binding                                       | 0.29081<br>0321 | 0.21004<br>2758 | 1 |
| GO:000<br>4857 | enzyme inhibitor activity                                    | 0.29566<br>4851 | 0.21289<br>3968 | 1 |
| GO:003<br>0971 | receptor tyrosine kinase binding                             | 0.30134<br>7827 | 0.21566<br>2918 | 1 |
| GO:003<br>3293 | monocarboxylic acid binding                                  | 0.30134<br>7827 | 0.21566<br>2918 | 1 |

|                |                                                                             |                 |                 |   |
|----------------|-----------------------------------------------------------------------------|-----------------|-----------------|---|
| GO:000<br>5230 | extracellular ligand-gated ion channel activity                             | 0.30828<br>6649 | 0.21929<br>1619 | 1 |
| GO:001<br>6835 | carbon-oxygen lyase activity                                                | 0.30828<br>6649 | 0.21929<br>1619 | 1 |
| GO:000<br>4722 | protein serine/threonine phosphatase activity                               | 0.31173<br>0456 | 0.22107<br>1368 | 1 |
| GO:001<br>6747 | transferase activity, transferring acyl groups other than amino-acyl groups | 0.31437<br>1103 | 0.22227<br>253  | 1 |
| GO:001<br>9905 | syntaxin binding                                                            | 0.32196<br>046  | 0.22695<br>49   | 1 |
| GO:001<br>9199 | transmembrane receptor protein kinase activity                              | 0.32869<br>6769 | 0.23100<br>9705 | 1 |
| GO:000<br>8080 | N-acetyltransferase activity                                                | 0.34197<br>1438 | 0.23819<br>969  | 1 |
| GO:000<br>8135 | translation factor activity, RNA binding                                    | 0.34197<br>1438 | 0.23819<br>969  | 1 |
| GO:004<br>2562 | hormone binding                                                             | 0.34197<br>1438 | 0.23819<br>969  | 1 |
| GO:003<br>0165 | PDZ domain binding                                                          | 0.34524<br>9334 | 0.23977<br>1415 | 1 |
| GO:004<br>3178 | alcohol binding                                                             | 0.34851<br>108  | 0.24132<br>2685 | 1 |
| GO:000<br>5249 | voltage-gated potassium channel activity                                    | 0.35498<br>6436 | 0.24508<br>3514 | 1 |
| GO:007<br>2341 | modified amino acid binding                                                 | 0.36139<br>8132 | 0.24877<br>8464 | 1 |
| GO:001<br>6746 | transferase activity, transferring acyl groups                              | 0.36855<br>1653 | 0.25296<br>0968 | 1 |
| GO:000<br>8238 | exopeptidase activity                                                       | 0.37715<br>2905 | 0.25810<br>986  | 1 |
| GO:000<br>3713 | transcription coactivator activity                                          | 0.38274<br>2805 | 0.26117<br>3946 | 1 |
| GO:199<br>0782 | protein tyrosine kinase binding                                             | 0.38642<br>0602 | 0.26291<br>9281 | 1 |
| GO:001<br>6791 | phosphatase activity                                                        | 0.40029<br>2853 | 0.27157<br>0752 | 1 |
| GO:001<br>6410 | N-acyltransferase activity                                                  | 0.41341<br>3172 | 0.27966<br>3696 | 1 |
| GO:009<br>0079 | translation regulator activity, nucleic acid binding                        | 0.41925<br>0139 | 0.28279<br>7281 | 1 |
| GO:000<br>0149 | SNARE binding                                                               | 0.43641<br>8573 | 0.29269<br>5765 | 1 |
| GO:000<br>5088 | Ras guanyl-nucleotide exchange factor activity                              | 0.43641<br>8573 | 0.29269<br>5765 | 1 |

|                |                                                                          |                 |                 |   |
|----------------|--------------------------------------------------------------------------|-----------------|-----------------|---|
| GO:000<br>3730 | mRNA 3'-UTR binding                                                      | 0.44202<br>9074 | 0.29561<br>3986 | 1 |
| GO:009<br>9106 | ion channel regulator activity                                           | 0.44758<br>433  | 0.29763<br>3236 | 1 |
| GO:190<br>2936 | phosphatidylinositol biphosphate binding                                 | 0.44758<br>433  | 0.29763<br>3236 | 1 |
| GO:000<br>3712 | transcription coregulator activity                                       | 0.45025<br>8379 | 0.29777<br>9494 | 1 |
| GO:000<br>5267 | potassium channel activity                                               | 0.45034<br>1409 | 0.29777<br>9494 | 1 |
| GO:000<br>5179 | hormone activity                                                         | 0.45581<br>4804 | 0.30055<br>2044 | 1 |
| GO:001<br>5078 | proton transmembrane transporter activity                                | 0.46926<br>3583 | 0.30855<br>3086 | 1 |
| GO:001<br>7124 | SH3 domain binding                                                       | 0.47978<br>5482 | 0.31459<br>0304 | 1 |
| GO:004<br>4325 | ion channel binding                                                      | 0.48238<br>3557 | 0.31534<br>6383 | 1 |
| GO:001<br>6779 | nucleotidyltransferase activity                                          | 0.48496<br>8798 | 0.31534<br>6383 | 1 |
| GO:004<br>3021 | ribonucleoprotein complex binding                                        | 0.48496<br>8798 | 0.31534<br>6383 | 1 |
| GO:000<br>5319 | lipid transporter activity                                               | 0.48754<br>1268 | 0.31614<br>3364 | 1 |
| GO:000<br>1227 | DNA-binding transcription repressor activity, RNA polymerase II-specific | 0.49701<br>6593 | 0.32139<br>974  | 1 |
| GO:000<br>1217 | DNA-binding transcription repressor activity                             | 0.49859<br>874  | 0.32153<br>7071 | 1 |
| GO:004<br>5182 | translation regulator activity                                           | 0.50021<br>4231 | 0.32169<br>5093 | 1 |
| GO:006<br>0589 | nucleoside-triphosphatase regulator activity                             | 0.51733<br>9176 | 0.33179<br>9356 | 1 |
| GO:000<br>8528 | G protein-coupled peptide receptor activity                              | 0.52224<br>9314 | 0.33403<br>5844 | 1 |
| GO:000<br>1653 | peptide receptor activity                                                | 0.53173<br>1611 | 0.33917<br>6628 | 1 |
| GO:001<br>5079 | potassium ion transmembrane transporter activity                         | 0.54102<br>7732 | 0.34417<br>1115 | 1 |
| GO:001<br>5631 | tubulin binding                                                          | 0.54309<br>595  | 0.34455<br>3049 | 1 |
| GO:000<br>5201 | extracellular matrix structural constituent                              | 0.56999<br>7583 | 0.36064<br>5371 | 1 |
| GO:000<br>4721 | phosphoprotein phosphatase activity                                      | 0.59104<br>4652 | 0.37195<br>6984 | 1 |

|                |                                                    |                 |                 |   |
|----------------|----------------------------------------------------|-----------------|-----------------|---|
| GO:190<br>1981 | phosphatidylinositol phosphate binding             | 0.59104<br>4652 | 0.37195<br>6984 | 1 |
| GO:001<br>6829 | lyase activity                                     | 0.61107<br>2313 | 0.38353<br>258  | 1 |
| GO:000<br>3714 | transcription corepressor activity                 | 0.62071<br>9223 | 0.38854<br>8454 | 1 |
| GO:001<br>6758 | transferase activity, transferring hexosyl groups  | 0.63382<br>8507 | 0.39569<br>9208 | 1 |
| GO:000<br>3779 | actin binding                                      | 0.64148<br>9924 | 0.39924<br>9438 | 1 |
| GO:005<br>1015 | actin filament binding                             | 0.64291<br>6921 | 0.39924<br>9438 | 1 |
| GO:014<br>0097 | catalytic activity, acting on DNA                  | 0.64826<br>2504 | 0.40150<br>6842 | 1 |
| GO:000<br>5085 | guanyl-nucleotide exchange factor activity         | 0.65871<br>7356 | 0.40690<br>8505 | 1 |
| GO:000<br>5543 | phospholipid binding                               | 0.66217<br>7938 | 0.40797<br>2593 | 1 |
| GO:006<br>1134 | peptidase regulator activity                       | 0.68193<br>183  | 0.41904<br>3257 | 1 |
| GO:003<br>5091 | phosphatidylinositol binding                       | 0.73065<br>3118 | 0.44780<br>9936 | 1 |
| GO:000<br>8017 | microtubule binding                                | 0.73469<br>7698 | 0.44911<br>6192 | 1 |
| GO:003<br>0246 | carbohydrate binding                               | 0.73736<br>0654 | 0.44957<br>3276 | 1 |
| GO:000<br>5096 | GTPase activator activity                          | 0.74775<br>0676 | 0.45355<br>2021 | 1 |
| GO:001<br>6757 | transferase activity, transferring glycosyl groups | 0.74775<br>0676 | 0.45355<br>2021 | 1 |
| GO:003<br>0695 | GTPase regulator activity                          | 0.78539<br>8356 | 0.47515<br>9613 | 1 |
| GO:001<br>9001 | guanyl nucleotide binding                          | 0.86400<br>186  | 0.52003<br>3508 | 1 |
| GO:003<br>2561 | guanyl ribonucleotide binding                      | 0.86400<br>186  | 0.52003<br>3508 | 1 |
| GO:001<br>7016 | Ras GTPase binding                                 | 0.87589<br>3789 | 0.52584<br>2819 | 1 |
| GO:003<br>1267 | small GTPase binding                               | 0.88383<br>6971 | 0.52925<br>7907 | 1 |

**Table S4.** Results of KEGG terms enrichment of *Scutellaria baicalensis* in breast cancer.

| ID       | Description                                          | pvalue      | qvalue      | Count |
|----------|------------------------------------------------------|-------------|-------------|-------|
| hsa05417 | Lipid and atherosclerosis                            | 4.61314E-19 | 3.88475E-17 | 24    |
| hsa05161 | Hepatitis B                                          | 8.59501E-17 | 2.51817E-15 | 22    |
| hsa04933 | AGE-RAGE signaling pathway in diabetic complications | 8.97098E-17 | 2.51817E-15 | 20    |
| hsa05163 | Human cytomegalovirus infection                      | 3.09276E-16 | 6.51108E-15 | 20    |
| hsa05167 | Kaposi sarcoma-associated herpesvirus infection      | 3.05986E-15 | 5.15345E-14 | 18    |
| hsa04657 | IL-17 signaling pathway                              | 1.83733E-14 | 2.57871E-13 | 18    |
| hsa05222 | Small cell lung cancer                               | 2.92941E-13 | 3.5241E-12  | 17    |
| hsa05162 | Measles                                              | 6.74265E-12 | 7.09752E-11 | 17    |
| hsa05205 | Proteoglycans in cancer                              | 1.68193E-11 | 1.57373E-10 | 17    |
| hsa05170 | Human immunodeficiency virus 1 infection             | 2.88299E-11 | 2.20707E-10 | 17    |
| hsa05207 | Chemical carcinogenesis - receptor activation        | 2.88299E-11 | 2.20707E-10 | 15    |
| hsa04932 | Non-alcoholic fatty liver disease                    | 3.30637E-11 | 2.32026E-10 | 15    |
| hsa05210 | Colorectal cancer                                    | 4.80082E-11 | 3.10984E-10 | 15    |
| hsa04210 | Apoptosis                                            | 6.93656E-11 | 4.17237E-10 | 15    |
| hsa04115 | p53 signaling pathway                                | 1.38225E-10 | 7.76001E-10 | 15    |
| hsa01522 | Endocrine resistance                                 | 2.31256E-10 | 1.21714E-09 | 14    |
| hsa05142 | Chagas disease                                       | 3.72245E-10 | 1.84394E-09 | 14    |
| hsa05160 | Hepatitis C                                          | 4.80952E-10 | 2.25007E-09 | 14    |
| hsa04668 | TNF signaling pathway                                | 1.12154E-09 | 4.9708E-09  | 14    |
| hsa05169 | Epstein-Barr virus infection                         | 1.42444E-09 | 5.89244E-09 | 14    |
| hsa05164 | Influenza A                                          | 1.4934E-09  | 5.89244E-09 | 13    |
| hsa04936 | Alcoholic liver disease                              | 1.5394E-09  | 5.89244E-09 | 13    |
| hsa01524 | Platinum drug resistance                             | 2.65084E-09 | 9.70558E-09 | 13    |
| hsa05215 | Prostate cancer                                      | 3.17274E-09 | 1.11324E-08 | 13    |
| hsa05135 | Yersinia infection                                   | 1.15047E-08 | 3.83807E-08 | 13    |
| hsa04151 | PI3K-Akt signaling pathway                           | 1.185E-08   | 3.83807E-08 | 13    |
| hsa04915 | Estrogen signaling pathway                           | 1.24977E-08 | 3.89791E-08 | 12    |
| hsa05418 | Fluid shear stress and atherosclerosis               | 1.3567E-08  | 4.08032E-08 | 12    |
| hsa05224 | Breast cancer                                        | 2.55584E-08 | 7.42168E-08 | 12    |
| hsa04919 | Thyroid hormone signaling pathway                    | 3.34334E-08 | 9.38483E-08 | 12    |
| hsa05133 | Pertussis                                            | 6.43187E-08 | 1.7472E-07  | 12    |
| hsa05130 | Pathogenic Escherichia coli infection                | 8.15295E-08 | 2.14551E-07 | 12    |
| hsa04625 | C-type lectin receptor signaling pathway             | 8.62348E-08 | 2.20057E-07 | 12    |
| hsa05134 | Legionellosis                                        | 9.35542E-08 | 2.31713E-07 | 12    |
| hsa04066 | HIF-1 signaling pathway                              | 1.35165E-07 | 3.25208E-07 | 12    |
| hsa05219 | Bladder cancer                                       | 1.53837E-07 | 3.59852E-07 | 12    |
| hsa05145 | Toxoplasmosis                                        | 1.75034E-07 | 3.98369E-07 | 11    |
| hsa04010 | MAPK signaling pathway                               | 2.24107E-07 | 4.85612E-07 | 11    |
| hsa04726 | Serotonergic synapse                                 | 2.24899E-07 | 4.85612E-07 | 11    |
| hsa05152 | Tuberculosis                                         | 2.4158E-07  | 5.08588E-07 | 11    |
| hsa04722 | Neurotrophin signaling pathway                       | 3.10584E-07 | 6.37913E-07 | 11    |

|          |                                                        |             |             |    |
|----------|--------------------------------------------------------|-------------|-------------|----|
| hsa05166 | Human T-cell leukemia virus 1 infection                | 3.29132E-07 | 6.59913E-07 | 11 |
| hsa04218 | Cellular senescence                                    | 4.56566E-07 | 8.94131E-07 | 11 |
| hsa04917 | Prolactin signaling pathway                            | 4.80073E-07 | 9.18801E-07 | 11 |
| hsa05223 | Non-small cell lung cancer                             | 5.98694E-07 | 1.12036E-06 | 10 |
| hsa04926 | Relaxin signaling pathway                              | 6.60946E-07 | 1.20997E-06 | 10 |
| hsa04215 | Apoptosis - multiple species                           | 6.98678E-07 | 1.25183E-06 | 10 |
| hsa05212 | Pancreatic cancer                                      | 9.12531E-07 | 1.60093E-06 | 10 |
| hsa04620 | Toll-like receptor signaling pathway                   | 9.84121E-07 | 1.69129E-06 | 10 |
| hsa05022 | Pathways of neurodegeneration - multiple diseases      | 1.04326E-06 | 1.75707E-06 | 10 |
| hsa05132 | Salmonella infection                                   | 1.22078E-06 | 1.99461E-06 | 10 |
| hsa01521 | EGFR tyrosine kinase inhibitor resistance              | 1.23167E-06 | 1.99461E-06 | 10 |
| hsa04659 | Th17 cell differentiation                              | 1.35545E-06 | 2.15365E-06 | 10 |
| hsa05213 | Endometrial cancer                                     | 1.78891E-06 | 2.78972E-06 | 10 |
| hsa04370 | VEGF signaling pathway                                 | 2.0131E-06  | 3.08225E-06 | 10 |
| hsa04261 | Adrenergic signaling in cardiomyocytes                 | 2.64281E-06 | 3.97415E-06 | 10 |
| hsa05323 | Rheumatoid arthritis                                   | 4.28311E-06 | 6.32778E-06 | 9  |
| hsa05165 | Human papillomavirus infection                         | 5.5165E-06  | 7.99153E-06 | 9  |
| hsa04380 | Osteoclast differentiation                             | 5.59907E-06 | 7.99153E-06 | 9  |
| hsa05131 | Shigellosis                                            | 6.8843E-06  | 9.66217E-06 | 9  |
| hsa05146 | Amoebiasis                                             | 8.56232E-06 | 1.18203E-05 | 9  |
| hsa04660 | T cell receptor signaling pathway                      | 9.89228E-06 | 1.3436E-05  | 9  |
| hsa05140 | Leishmaniasis                                          | 1.22387E-05 | 1.63591E-05 | 9  |
| hsa04024 | cAMP signaling pathway                                 | 1.37223E-05 | 1.80557E-05 | 9  |
| hsa04621 | NOD-like receptor signaling pathway                    | 1.63037E-05 | 2.11222E-05 | 8  |
| hsa04725 | Cholinergic synapse                                    | 1.82455E-05 | 2.32797E-05 | 8  |
| hsa04923 | Regulation of lipolysis in adipocytes                  | 2.05854E-05 | 2.58733E-05 | 8  |
| hsa05202 | Transcriptional misregulation in cancer                | 2.46873E-05 | 3.05725E-05 | 8  |
| hsa04071 | Sphingolipid signaling pathway                         | 2.66112E-05 | 3.24774E-05 | 8  |
| hsa04020 | Calcium signaling pathway                              | 2.96542E-05 | 3.56743E-05 | 8  |
| hsa05235 | PD-L1 expression and PD-1 checkpoint pathway in cancer | 3.1774E-05  | 3.7686E-05  | 8  |
| hsa05216 | Thyroid cancer                                         | 3.34167E-05 | 3.90838E-05 | 8  |
| hsa04728 | Dopaminergic synapse                                   | 5.61263E-05 | 6.47455E-05 | 8  |
| hsa05031 | Amphetamine addiction                                  | 6.83731E-05 | 7.67698E-05 | 8  |
| hsa05211 | Renal cell carcinoma                                   | 6.83731E-05 | 7.67698E-05 | 8  |
| hsa05208 | Chemical carcinogenesis - reactive oxygen species      | 8.43683E-05 | 9.34828E-05 | 8  |
| hsa05214 | Glioma                                                 | 0.000109378 | 0.000118768 | 8  |
| hsa04931 | Insulin resistance                                     | 0.000110009 | 0.000118768 | 8  |
| hsa05171 | Coronavirus disease - COVID-19                         | 0.00011726  | 0.000123991 | 8  |
| hsa05220 | Chronic myeloid leukemia                               | 0.000117791 | 0.000123991 | 8  |
| hsa05010 | Alzheimer disease                                      | 0.000125842 | 0.00013083  | 7  |
| hsa05226 | Gastric cancer                                         | 0.00013184  | 0.000134731 | 7  |
| hsa05030 | Cocaine addiction                                      | 0.000132794 | 0.000134731 | 7  |
| hsa04921 | Oxytocin signaling pathway                             | 0.000165786 | 0.000166202 | 7  |

|          |                                                            |             |             |   |
|----------|------------------------------------------------------------|-------------|-------------|---|
| hsa04662 | B cell receptor signaling pathway                          | 0.000179687 | 0.000178018 | 7 |
| hsa04510 | Focal adhesion                                             | 0.000197598 | 0.000193486 | 7 |
| hsa05203 | Viral carcinogenesis                                       | 0.000220845 | 0.000213764 | 7 |
| hsa01523 | Antifolate resistance                                      | 0.000227715 | 0.000217909 | 7 |
| hsa04022 | cGMP-PKG signaling pathway                                 | 0.000288997 | 0.000273445 | 7 |
| hsa05206 | MicroRNAs in cancer                                        | 0.000292599 | 0.000273777 | 7 |
| hsa05225 | Hepatocellular carcinoma                                   | 0.000300955 | 0.000278501 | 6 |
| hsa05416 | Viral myocarditis                                          | 0.000348324 | 0.000318832 | 6 |
| hsa04970 | Salivary secretion                                         | 0.000357723 | 0.000323914 | 6 |
| hsa04068 | FoxO signaling pathway                                     | 0.000364607 | 0.000326636 | 6 |
| hsa00590 | Arachidonic acid metabolism                                | 0.000376407 | 0.000333657 | 6 |
| hsa05321 | Inflammatory bowel disease                                 | 0.000506186 | 0.000444022 | 6 |
| hsa05143 | African trypanosomiasis                                    | 0.000519737 | 0.000451209 | 6 |
| hsa04064 | NF-kappa B signaling pathway                               | 0.000651315 | 0.00055967  | 6 |
| hsa04622 | RIG-I-like receptor signaling pathway                      | 0.000712702 | 0.00060017  | 6 |
| hsa05120 | Epithelial cell signaling in Helicobacter pylori infection | 0.000712702 | 0.00060017  | 6 |
| hsa00982 | Drug metabolism - cytochrome P450                          | 0.000810878 | 0.000669455 | 6 |
| hsa05218 | Melanoma                                                   | 0.000810878 | 0.000669455 | 6 |
| hsa04080 | Neuroactive ligand-receptor interaction                    | 0.000874286 | 0.000714797 | 6 |
| hsa05168 | Herpes simplex virus 1 infection                           | 0.001429049 | 0.001157124 | 6 |
| hsa04310 | Wnt signaling pathway                                      | 0.001539529 | 0.00123471  | 5 |
| hsa05144 | Malaria                                                    | 0.001638647 | 0.001301805 | 5 |
| hsa04012 | ErbB signaling pathway                                     | 0.00171407  | 0.001348998 | 5 |
| hsa04110 | Cell cycle                                                 | 0.001769035 | 0.001379364 | 5 |
| hsa05020 | Prion disease                                              | 0.001798459 | 0.001389442 | 5 |
| hsa04658 | Th1 and Th2 cell differentiation                           | 0.002430703 | 0.001860825 | 5 |
| hsa05231 | Choline metabolism in cancer                               | 0.003200496 | 0.002428067 | 5 |
| hsa05217 | Basal cell carcinoma                                       | 0.003833453 | 0.002882295 | 5 |
| hsa04928 | Parathyroid hormone synthesis, secretion and action        | 0.004482388 | 0.003340392 | 5 |
| hsa05415 | Diabetic cardiomyopathy                                    | 0.004603171 | 0.003400311 | 5 |
| hsa05221 | Acute myeloid leukemia                                     | 0.00478303  | 0.003502448 | 5 |
| hsa04664 | Fc epsilon RI signaling pathway                            | 0.005042988 | 0.003660971 | 5 |
| hsa04920 | Adipocytokine signaling pathway                            | 0.005312274 | 0.003823499 | 5 |
| hsa04217 | Necroptosis                                                | 0.005613054 | 0.003998083 | 5 |
| hsa05012 | Parkinson disease                                          | 0.005649791 | 0.003998083 | 5 |
| hsa00350 | Tyrosine metabolism                                        | 0.005776591 | 0.004053748 | 5 |
| hsa04630 | JAK-STAT signaling pathway                                 | 0.006140253 | 0.004264068 | 5 |
| hsa04137 | Mitophagy - animal                                         | 0.006177569 | 0.004264068 | 5 |
| hsa04935 | Growth hormone synthesis, secretion and action             | 0.007288291 | 0.004989844 | 4 |
| hsa00380 | Tryptophan metabolism                                      | 0.008889092 | 0.005988441 | 4 |
| hsa05332 | Graft-versus-host disease                                  | 0.008889092 | 0.005988441 | 4 |
| hsa04014 | Ras signaling pathway                                      | 0.009378244 | 0.006267832 | 4 |
| hsa04650 | Natural killer cell mediated cytotoxicity                  | 0.010802383 | 0.00716279  | 4 |



|          |                                                               |             |             |   |
|----------|---------------------------------------------------------------|-------------|-------------|---|
| hsa00360 | Phenylalanine metabolism                                      | 0.011301709 | 0.007435335 | 4 |
| hsa05014 | Amyotrophic lateral sclerosis                                 | 0.011683758 | 0.007627096 | 4 |
| hsa04211 | Longevity regulating pathway                                  | 0.0128685   | 0.00833587  | 4 |
| hsa04062 | Chemokine signaling pathway                                   | 0.013569946 | 0.008723147 | 4 |
| hsa05032 | Morphine addiction                                            | 0.013872307 | 0.008849957 | 4 |
| hsa04912 | GnRH signaling pathway                                        | 0.01492469  | 0.009449744 | 4 |
| hsa00330 | Arginine and proline metabolism                               | 0.015101139 | 0.009490111 | 4 |
| hsa04750 | Inflammatory mediator regulation of TRP channels              | 0.017772846 | 0.011086376 | 4 |
| hsa04061 | Viral protein interaction with cytokine and cytokine receptor | 0.01900071  | 0.011765145 | 4 |
| hsa04340 | Hedgehog signaling pathway                                    | 0.019383861 | 0.011914782 | 4 |
| hsa04914 | Progesterone-mediated oocyte maturation                       | 0.0202801   | 0.012286316 | 4 |
| hsa04972 | Pancreatic secretion                                          | 0.0202801   | 0.012286316 | 4 |
| hsa00340 | Histidine metabolism                                          | 0.020911778 | 0.012578513 | 4 |
| hsa04929 | GnRH secretion                                                | 0.027494153 | 0.016420547 | 4 |
| hsa00830 | Retinol metabolism                                            | 0.032129778 | 0.019053982 | 4 |
| hsa04924 | Renin secretion                                               | 0.033348755 | 0.019502196 | 4 |
| hsa05204 | Chemical carcinogenesis - DNA adducts                         | 0.033348755 | 0.019502196 | 4 |
| hsa04152 | AMPK signaling pathway                                        | 0.034188768 | 0.019855546 | 4 |
| hsa05230 | Central carbon metabolism in cancer                           | 0.034591638 | 0.019951918 | 4 |
| hsa00591 | Linoleic acid metabolism                                      | 0.035104237 | 0.020109839 | 3 |
| hsa04613 | Neutrophil extracellular trap formation                       | 0.044727514 | 0.025310717 | 3 |
| hsa04114 | Oocyte meiosis                                                | 0.044869847 | 0.025310717 | 3 |
| hsa00980 | Metabolism of xenobiotics by cytochrome P450                  | 0.045385279 | 0.025310717 | 3 |
| hsa04721 | Synaptic vesicle cycle                                        | 0.045385279 | 0.025310717 | 3 |
| hsa04270 | Vascular smooth muscle contraction                            | 0.048073579 | 0.026633562 | 3 |
| hsa04910 | Insulin signaling pathway                                     | 0.051401678 | 0.028291257 | 3 |
| hsa04960 | Aldosterone-regulated sodium reabsorption                     | 0.054657485 | 0.029887893 | 3 |
| hsa04140 | Autophagy - animal                                            | 0.056031875 | 0.030441766 | 3 |
| hsa05330 | Allograft rejection                                           | 0.05732035  | 0.030942159 | 3 |
| hsa00260 | Glycine, serine and threonine metabolism                      | 0.062778544 | 0.033672702 | 3 |
| hsa04015 | Rap1 signaling pathway                                        | 0.063480294 | 0.033833601 | 3 |
| hsa05410 | Hypertrophic cardiomyopathy                                   | 0.064315953 | 0.034063398 | 3 |
| hsa04940 | Type I diabetes mellitus                                      | 0.071279805 | 0.037515687 | 3 |
| hsa04934 | Cushing syndrome                                              | 0.073947977 | 0.038678249 | 3 |
| hsa05414 | Dilated cardiomyopathy                                        | 0.074947168 | 0.038916487 | 3 |
| hsa04150 | mTOR signaling pathway                                        | 0.075327725 | 0.038916487 | 3 |
| hsa04666 | Fc gamma R-mediated phagocytosis                              | 0.076790863 | 0.039430482 | 3 |
| hsa04930 | Type II diabetes mellitus                                     | 0.080131306 | 0.04089636  | 3 |
| hsa05016 | Huntington disease                                            | 0.092545419 | 0.046947581 | 3 |
| hsa04961 | Endocrine and other factor-regulated calcium reabsorption     | 0.101989153 | 0.051428505 | 3 |
| hsa04670 | Leukocyte transendothelial migration                          | 0.111037866 | 0.055658078 | 3 |
| hsa05034 | Alcoholism                                                    | 0.124278678 | 0.061926467 | 2 |
| hsa04611 | Platelet activation                                           | 0.13348481  | 0.066122507 | 2 |

|          |                                                          |             |             |   |
|----------|----------------------------------------------------------|-------------|-------------|---|
| hsa04623 | Cytosolic DNA-sensing pathway                            | 0.135603311 | 0.066779101 | 2 |
| hsa00061 | Fatty acid biosynthesis                                  | 0.169100639 | 0.082644468 | 2 |
| hsa04371 | Apelin signaling pathway                                 | 0.169782728 | 0.082644468 | 2 |
| hsa03320 | PPAR signaling pathway                                   | 0.178593433 | 0.086083161 | 2 |
| hsa04550 | Signaling pathways regulating pluripotency of stem cells | 0.179913806 | 0.086083161 | 2 |
| hsa05017 | Spinocerebellar ataxia                                   | 0.179913806 | 0.086083161 | 2 |
| hsa04971 | Gastric acid secretion                                   | 0.182270379 | 0.086387152 | 2 |
| hsa04810 | Regulation of actin cytoskeleton                         | 0.183583265 | 0.086387152 | 2 |
| hsa04060 | Cytokine-cytokine receptor interaction                   | 0.18362669  | 0.086387152 | 2 |
| hsa04072 | Phospholipase D signaling pathway                        | 0.192805833 | 0.089703208 | 2 |
| hsa04723 | Retrograde endocannabinoid signaling                     | 0.192805833 | 0.089703208 | 2 |
| hsa00220 | Arginine biosynthesis                                    | 0.202655714 | 0.093767826 | 2 |
| hsa04610 | Complement and coagulation cascades                      | 0.215808788 | 0.099308042 | 2 |
| hsa04742 | Taste transduction                                       | 0.219574432 | 0.099948532 | 2 |
| hsa04911 | Insulin secretion                                        | 0.219574432 | 0.099948532 | 2 |
| hsa04540 | Gap junction                                             | 0.227122808 | 0.102828662 | 2 |
| hsa04713 | Circadian entrainment                                    | 0.261276811 | 0.117659133 | 2 |
| hsa04640 | Hematopoietic cell lineage                               | 0.268886457 | 0.120441862 | 2 |
| hsa05310 | Asthma                                                   | 0.273337689 | 0.121787887 | 2 |
| hsa04916 | Melanogenesis                                            | 0.276496053 | 0.122546727 | 2 |
| hsa04974 | Protein digestion and absorption                         | 0.284102485 | 0.125258742 | 2 |
| hsa04922 | Glucagon signaling pathway                               | 0.299294019 | 0.131269307 | 2 |
| hsa00500 | Starch and sucrose metabolism                            | 0.309892276 | 0.135213428 | 2 |
| hsa04216 | Ferroptosis                                              | 0.344629041 | 0.149594809 | 2 |
| hsa00071 | Fatty acid degradation                                   | 0.35803492  | 0.154616969 | 1 |
| hsa00230 | Purine metabolism                                        | 0.377829162 | 0.162332615 | 1 |
| hsa00620 | Pyruvate metabolism                                      | 0.384039132 | 0.163334028 | 1 |
| hsa04973 | Carbohydrate digestion and absorption                    | 0.384039132 | 0.163334028 | 1 |
| hsa04672 | Intestinal immune network for IgA production             | 0.396648184 | 0.167849007 | 1 |
| hsa05110 | Vibrio cholerae infection                                | 0.402856738 | 0.16962389  | 1 |
| hsa04913 | Ovarian steroidogenesis                                  | 0.409002168 | 0.171354666 | 1 |
| hsa05320 | Autoimmune thyroid disease                               | 0.421106183 | 0.175552343 | 1 |
| hsa01212 | Fatty acid metabolism                                    | 0.444584197 | 0.184426942 | 1 |
| hsa04730 | Long-term depression                                     | 0.461572993 | 0.190535807 | 1 |
| hsa00140 | Steroid hormone biosynthesis                             | 0.46712103  | 0.191885404 | 1 |
| hsa04213 | Longevity regulating pathway - multiple species          | 0.472612582 | 0.193198807 | 1 |
| hsa04390 | Hippo signaling pathway                                  | 0.479827553 | 0.195200632 | 1 |
| hsa00010 | Glycolysis / Gluconeogenesis                             | 0.499242736 | 0.201155472 | 1 |
| hsa04720 | Long-term potentiation                                   | 0.499242736 | 0.201155472 | 1 |
| hsa04530 | Tight junction                                           | 0.519044427 | 0.208138116 | 1 |
| hsa04141 | Protein processing in endoplasmic reticulum              | 0.52539125  | 0.20968471  | 1 |
| hsa04918 | Thyroid hormone synthesis                                | 0.539113484 | 0.214146369 | 1 |
| hsa05100 | Bacterial invasion of epithelial cells                   | 0.548580768 | 0.215870445 | 1 |

|          |                                                 |             |             |   |
|----------|-------------------------------------------------|-------------|-------------|---|
| hsa05412 | Arrhythmogenic right ventricular cardiomyopathy | 0.548580768 | 0.215870445 | 1 |
| hsa04612 | Antigen processing and presentation             | 0.553242101 | 0.216692133 | 1 |
| hsa04360 | Axon guidance                                   | 0.559298765 | 0.218050201 | 1 |
| hsa00983 | Drug metabolism - other enzymes                 | 0.562422571 | 0.218257607 | 1 |
| hsa04146 | Peroxisome                                      | 0.571416617 | 0.220730707 | 1 |
| hsa04260 | Cardiac muscle contraction                      | 0.593110493 | 0.228064597 | 1 |
| hsa04512 | ECM-receptor interaction                        | 0.597317248 | 0.228157811 | 1 |
| hsa04727 | GABAergic synapse                               | 0.601481028 | 0.228157811 | 1 |
| hsa04976 | Bile secretion                                  | 0.601481028 | 0.228157811 | 1 |
| hsa04350 | TGF-beta signaling pathway                      | 0.621670349 | 0.234758687 | 1 |
| hsa04070 | Phosphatidylinositol signaling system           | 0.633295351 | 0.237388494 | 1 |
| hsa00564 | Glycerophospholipid metabolism                  | 0.637091371 | 0.237388494 | 1 |
| hsa04925 | Aldosterone synthesis and secretion             | 0.637091371 | 0.237388494 | 1 |
| hsa03008 | Ribosome biogenesis in eukaryotes               | 0.676369431 | 0.25091377  | 1 |
| hsa04724 | Glutamatergic synapse                           | 0.692804957 | 0.255883641 | 1 |
| hsa00190 | Oxidative phosphorylation                       | 0.750695304 | 0.276054352 | 1 |
| hsa05322 | Systemic lupus erythematosus                    | 0.75585405  | 0.276742902 | 1 |
| hsa04145 | Phagosome                                       | 0.793500231 | 0.28926871  | 1 |
| hsa04714 | Thermogenesis                                   | 0.911069204 | 0.330696626 | 1 |
